# Supplementary material
Source: publisher figshare collection journal article supplement (https://gsajournals.figshare.com/ndownloader/files/12947954)
Supplement: Supplementary file 1 [file 12947954]

## Sheet: Dataset1_Koike
Transcript	Isoform	Gene	Proximal/Distal	Chromosome	UTR_start	UTR_end	MISO_psi_CT0	MISO_psi_CT4	MISO_psi_CT8	MISO_psi_CT12	MISO_psi_CT16	MISO_psi_CT20	MISO_psi_CT24	MISO_psi_CT28	MISO_psi_CT32	MISO_psi_CT36	MISO_psi_CT40	MISO_psi_CT44	Average_MISO_psi	MISO_Delta_psi_CT0	MISO_Delta_psi_CT4	MISO_Delta_psi_CT8	MISO_Delta_psi_CT12	MISO_Delta_psi_CT16	MISO_Delta_psi_CT20	MISO_Delta_psi_CT24	MISO_Delta_psi_CT28	MISO_Delta_psi_CT32	MISO_Delta_psi_CT36	MISO_Delta_psi_CT40	MISO_Delta_psi_CT44	Average_delta_psi	meta2d_pvalue	meta2d_BH.Q	meta2d_period	meta2d_phase	meta2d_Base	meta2d_AMP	meta2d_rAMP	HOMER_CT0_tag	HOMER_CT4_tag	HOMER_CT8_tag	HOMER_CT12_tag	HOMER_CT16_tag	HOMER_CT20_tag	HOMER_CT24_tag	HOMER_CT28_tag	HOMER_CT32_tag	HOMER_CT36_tag
1810013L24Rik:8843337.1	1810013L24Rik:8843337	1810013L24Rik	Distal	chr16	8843337	8844226	0	0.78	0.8	0.86	0.44	0.67	0.68	0.83	0.8	0.58	0.31	0.77	0.626667	1	-0.56	-0.6	-0.72	0.12	-0.34	-0.36	-0.66	-0.6	-0.16	0.38	-0.54	-0.253333	0.00161317	0.150522	20.1573	19.4003	-0.30306	0.542754	0.542754	5.597	8.493	14.666	14.8	12.938	14.032	18.458	24.274	31.856	23.005
1810013L24Rik:8843337.2	1810013L24Rik:8843337	1810013L24Rik	Proximal	chr16	8843337	8843494	1	0.22	0.2	0.14	0.56	0.33	0.32	0.17	0.2	0.42	0.69	0.23	0.373333	1	-0.56	-0.6	-0.72	0.12	-0.34	-0.36	-0.66	-0.6	-0.16	0.38	-0.54	-0.253333	0.00161317	0.150522	20.1573	19.4003	-0.30306	0.542754	0.542754	5.597	8.493	14.666	14.8	12.938	14.032	18.458	24.274	31.856	23.005
1810063B05Rik:128948903.3	1810063B05Rik:128948903	1810063B05Rik	Distal	chr8	128948903	128952262	0.06	0.01	0.17	0.25	0.2	0.07	0.18	0.2	0.26	0.18	0	0.05	0.135833	0.32	0	0.05	-0.01	0.24	0.35	0.16	-0.01	-0.04	0.06	0.02	0.31	0.120833	0.000993742	0.104818	24.3676	20.7426	0.123489	0.175133	0.175133	17.535	11.361	14.533	24.8	19.441	18.516	33.506	32.016	45.959	56.088
1810063B05Rik:128948903.4	1810063B05Rik:128948903	1810063B05Rik	Proximal	chr8	128948903	128950286	0.38	0.01	0.22	0.24	0.44	0.42	0.34	0.19	0.22	0.24	0.02	0.36	0.256667	0.32	0	0.05	-0.01	0.24	0.35	0.16	-0.01	-0.04	0.06	0.02	0.31	0.120833	0.000993742	0.104818	24.3676	20.7426	0.123489	0.175133	0.175133	17.535	11.361	14.533	24.8	19.441	18.516	33.506	32.016	45.959	56.088
2010111I01Rik:63400020.1	2010111I01Rik:63400020	2010111I01Rik	Distal	chr13	63400020	63404166	0.61	0.57	0.48	0.64	0.78	0.79	0.6	0.56	0.68	0.84	0.89	0.63	0.6725	-0.32	-0.44	-0.21	-0.42	-0.67	-0.63	-0.23	-0.2	-0.49	-0.72	-0.82	-0.31	-0.455	0.000954129	0.104818	20.4738	7.07132	-0.450968	0.241736	0.241736	1.932	2.207	4.643	6.027	4.906	5.193	4.599	4.956	8.701	7.778
2010111I01Rik:63400020.3	2010111I01Rik:63400020	2010111I01Rik	Proximal	chr13	63400020	63400980	0.29	0.13	0.27	0.22	0.11	0.16	0.37	0.36	0.19	0.12	0.07	0.32	0.2175	-0.32	-0.44	-0.21	-0.42	-0.67	-0.63	-0.23	-0.2	-0.49	-0.72	-0.82	-0.31	-0.455	0.000954129	0.104818	20.4738	7.07132	-0.450968	0.241736	0.241736	1.932	2.207	4.643	6.027	4.906	5.193	4.599	4.956	8.701	7.778
2310035C23Rik:107650080.1	2310035C23Rik:107650080	2310035C23Rik	Distal	chr1	107650080	107651698	0.7	0.87	0.76	0.41	0.5	0.86	0.87	0.89	0.85	0.43	0.87	0.9	0.7425	-0.56	-0.78	-0.6	0.13	-0.08	-0.76	-0.79	-0.83	-0.77	0.02	-0.78	-0.84	-0.553333	0.00619691	0.344768	20.9455	15.0619	-0.530258	0.40334	0.40334	2.178	1.85	2.562	3.197	2.959	4.631	6.148	6.258	6.05	6.375
2310035C23Rik:107650080.3	2310035C23Rik:107650080	2310035C23Rik	Proximal	chr1	107650080	107650351	0.14	0.09	0.16	0.54	0.42	0.1	0.08	0.06	0.08	0.45	0.09	0.06	0.189167	-0.56	-0.78	-0.6	0.13	-0.08	-0.76	-0.79	-0.83	-0.77	0.02	-0.78	-0.84	-0.553333	0.00619691	0.344768	20.9455	15.0619	-0.530258	0.40334	0.40334	2.178	1.85	2.562	3.197	2.959	4.631	6.148	6.258	6.05	6.375
4933439F18Rik:60255481.1	4933439F18Rik:60255481	4933439F18Rik	Distal	chr11	60255481	60258779	0.43	0.33	0.6	0.63	0.46	0.57	0.48	0.45	0.59	0.7	0.57	0.69	0.541667	-0.15	-0.11	-0.37	-0.51	-0.33	-0.42	-0.12	-0.13	-0.38	-0.55	-0.32	-0.47	-0.321667	0.0289457	0.631697	24.5934	1.34927	-0.319423	0.163187	0.163187	1.887	2.892	3.694	4.374	3.516	4.398	6.206	5.354	5.782	5.85
4933439F18Rik:60255481.4	4933439F18Rik:60255481	4933439F18Rik	Proximal	chr11	60255481	60255590	0.28	0.22	0.23	0.12	0.13	0.15	0.36	0.32	0.21	0.15	0.25	0.22	0.22	-0.15	-0.11	-0.37	-0.51	-0.33	-0.42	-0.12	-0.13	-0.38	-0.55	-0.32	-0.47	-0.321667	0.0289457	0.631697	24.5934	1.34927	-0.319423	0.163187	0.163187	1.887	2.892	3.694	4.374	3.516	4.398	6.206	5.354	5.782	5.85
6720456H20Rik:49131578.1	6720456H20Rik:49131578	6720456H20Rik	Distal	chr14	49131578	49134906	0.14	0.21	0.15	0.14	0.08	0.12	0.24	0.11	0.19	0.13	0.1	0.28	0.1575	0.07	-0.05	0.03	0.08	0.12	-0.05	-0.12	0.05	0.04	0.15	-0.07	-0.21	0.00333333	0.00088554	0.104796	20.5261	13.7078	0.0155049	0.116626	0.116626	1.293	1.511	2.427	2.52	2.971	3.517	3.762	3.399	4.1	3.735
6720456H20Rik:49131578.3	6720456H20Rik:49131578	6720456H20Rik	Proximal	chr14	49131578	49134795	0.21	0.16	0.18	0.22	0.2	0.07	0.12	0.16	0.23	0.28	0.03	0.07	0.160833	0.07	-0.05	0.03	0.08	0.12	-0.05	-0.12	0.05	0.04	0.15	-0.07	-0.21	0.00333333	0.00088554	0.104796	20.5261	13.7078	0.0155049	0.116626	0.116626	1.293	1.511	2.427	2.52	2.971	3.517	3.762	3.399	4.1	3.735
Abcc9:142539023.1	Abcc9:142539023	Abcc9	Distal	chr6	142536386	142539023	0.44	0.38	0.3	0.19	0.28	0.42	0.73	0.72	0.6	0.47	0.35	0.58	0.455	-0.08	0.05	0.08	0.39	0.12	-0.23	-0.65	-0.61	-0.5	-0.18	-0.01	-0.4	-0.168333	0.00330093	0.246374	27.9074	11.2376	-0.209302	0.368867	0.368867	1.435	1.529	2.093	1.895	1.821	2.024	1.959	2.147	2.572	1.845
Abcc9:142539023.2	Abcc9:142539023	Abcc9	Proximal	chr6	142536463	142539023	0.36	0.43	0.38	0.58	0.4	0.19	0.08	0.11	0.1	0.29	0.34	0.18	0.286667	-0.08	0.05	0.08	0.39	0.12	-0.23	-0.65	-0.61	-0.5	-0.18	-0.01	-0.4	-0.168333	0.00330093	0.246374	27.9074	11.2376	-0.209302	0.368867	0.368867	1.435	1.529	2.093	1.895	1.821	2.024	1.959	2.147	2.572	1.845
Abcf3:20560430.6	Abcf3:20560430	Abcf3	Distal	chr16	20560430	20561011	0.3	0.33	0.28	0.28	0.23	0.4	0.21	0.26	0.35	0.17	0.23	0.42	0.288333	-0.14	0.09	0.19	-0.06	-0.09	-0.2	0.04	-0.03	0.03	-0.02	-0.07	-0.27	-0.0441667	0.00873456	0.374836	24.0935	7.57078	-0.0446	0.130724	0.130724	8.168	8.602	7.508	9.795	8.692	9.883	8.288	8.721	10.414	9.988
Abcf3:20560430.7	Abcf3:20560430	Abcf3	Proximal	chr16	20560430	20560891	0.16	0.42	0.47	0.22	0.14	0.2	0.25	0.23	0.38	0.15	0.16	0.15	0.244167	-0.14	0.09	0.19	-0.06	-0.09	-0.2	0.04	-0.03	0.03	-0.02	-0.07	-0.27	-0.0441667	0.00873456	0.374836	24.0935	7.57078	-0.0446	0.130724	0.130724	8.168	8.602	7.508	9.795	8.692	9.883	8.288	8.721	10.414	9.988
Acp2:91050764.1	Acp2:91050764	Acp2	Distal	chr2	91050764	91054252	0.43	0.48	0.43	0.32	0.5	0.55	0.38	0.43	0.5	0.46	0.66	0.74	0.49	-0.3	-0.22	-0.1	-0.1	-0.14	-0.3	-0.15	-0.24	-0.14	-0.27	-0.51	-0.63	-0.258333	0.0329155	0.673459	21.0922	11.708	-0.243465	0.131793	0.131793	13.798	14.771	12.299	15.242	18.686	23.255	25.592	25.82	19.995	16.822
Acp2:91050764.2	Acp2:91050764	Acp2	Proximal	chr2	91050764	91052302	0.13	0.26	0.33	0.22	0.36	0.25	0.23	0.19	0.36	0.19	0.15	0.11	0.231667	-0.3	-0.22	-0.1	-0.1	-0.14	-0.3	-0.15	-0.24	-0.14	-0.27	-0.51	-0.63	-0.258333	0.0329155	0.673459	21.0922	11.708	-0.243465	0.131793	0.131793	13.798	14.771	12.299	15.242	18.686	23.255	25.592	25.82	19.995	16.822
Adk:22137800.1	Adk:22137800	Adk	Distal	chr14	22137800	22140505	0.08	0.53	0.56	0.69	0.45	0.44	0.58	0.56	0.71	0.7	0.32	0.56	0.515	0.56	-0.21	-0.25	-0.47	-0.05	-0.01	-0.38	-0.32	-0.54	-0.52	0.15	-0.39	-0.2025	0.038545	0.730549	20.4113	0.0693466	-0.237033	0.300113	0.300113	7.155	6.806	12.366	19.988	16.161	20.441	18.074	19.207	30.095	34.785
Adk:22137800.2	Adk:22137800	Adk	Proximal	chr14	22137800	22138254	0.64	0.32	0.31	0.22	0.4	0.43	0.2	0.24	0.17	0.18	0.47	0.17	0.3125	0.56	-0.21	-0.25	-0.47	-0.05	-0.01	-0.38	-0.32	-0.54	-0.52	0.15	-0.39	-0.2025	0.038545	0.730549	20.4113	0.0693466	-0.237033	0.300113	0.300113	7.155	6.806	12.366	19.988	16.161	20.441	18.074	19.207	30.095	34.785
Ado:67011703.1	Ado:67011703	Ado	Distal	chr10	67007259	67011703	0.63	0.67	0.42	0.28	0.29	0.6	0.88	0.85	0.68	0.56	0.53	0.84	0.6025	-0.46	-0.48	0.01	0.35	0.3	-0.3	-0.82	-0.77	-0.46	-0.24	-0.21	-0.77	-0.320833	0.000296993	0.0664401	23.4776	13.7119	-0.313763	0.514938	0.514938	9.632	12.179	8.395	13.725	12.754	18.024	33.536	29.763	22.396	26.718
Ado:67011703.2	Ado:67011703	Ado	Proximal	chr10	67007879	67011703	0.17	0.19	0.43	0.63	0.59	0.3	0.06	0.08	0.22	0.32	0.32	0.07	0.281667	-0.46	-0.48	0.01	0.35	0.3	-0.3	-0.82	-0.77	-0.46	-0.24	-0.21	-0.77	-0.320833	0.000296993	0.0664401	23.4776	13.7119	-0.313763	0.514938	0.514938	9.632	12.179	8.395	13.725	12.754	18.024	33.536	29.763	22.396	26.718
Aes:81028217.1	Aes:81028217	Aes	Distal	chr10	81028217	81029107	0.51	0.71	0.53	0.38	0.28	0.49	0.85	0.63	0.74	0.44	0.87	0.96	0.615833	-0.02	-0.42	-0.06	0.24	0.44	0.02	-0.7	-0.26	-0.48	0.12	-0.74	-0.92	-0.231667	0.00835785	0.372039	20.088	15.3342	-0.204761	0.408801	0.408801	24.658	31.305	28.998	25.128	32.417	42.59	51.771	59.075	58.167	40.196
Aes:81028217.2	Aes:81028217	Aes	Proximal	chr10	81028217	81028909	0.49	0.29	0.47	0.62	0.72	0.51	0.15	0.37	0.26	0.56	0.13	0.04	0.384167	-0.02	-0.42	-0.06	0.24	0.44	0.02	-0.7	-0.26	-0.48	0.12	-0.74	-0.92	-0.231667	0.00835785	0.372039	20.088	15.3342	-0.204761	0.408801	0.408801	24.658	31.305	28.998	25.128	32.417	42.59	51.771	59.075	58.167	40.196
Agxt2l1:130337467.1	Agxt2l1:130337467	Agxt2l1	Distal	chr3	130337467	130340439	0.09	0.1	0.14	0.25	0.33	0.15	0.21	0.18	0.15	0.17	0.26	0.23	0.188333	0.1	0.04	-0.05	-0.16	-0.25	0.01	0.13	0.04	0.11	0	0.02	-0.06	-0.00583333	0.0207859	0.525277	27.4211	0.493649	-0.0021201	0.130558	0.130558	16.622	18.321	20.564	28.594	27.272	32.028	37.235	34.248	53.347	54.899
Agxt2l1:130337467.2	Agxt2l1:130337467	Agxt2l1	Proximal	chr3	130337467	130338672	0.19	0.14	0.09	0.09	0.08	0.16	0.34	0.22	0.26	0.17	0.28	0.17	0.1825	0.1	0.04	-0.05	-0.16	-0.25	0.01	0.13	0.04	0.11	0	0.02	-0.06	-0.00583333	0.0207859	0.525277	27.4211	0.493649	-0.0021201	0.130558	0.130558	16.622	18.321	20.564	28.594	27.272	32.028	37.235	34.248	53.347	54.899
Akap10:61686523.1	Akap10:61686523	Akap10	Distal	chr11	61684807	61686523	0.13	0.28	0.12	0.34	0.4	0.2	0.1	0.13	0.4	0.42	0.15	0.21	0.24	-0.02	-0.11	0.03	-0.26	-0.3	0.01	0.07	0.04	-0.29	-0.22	-0.04	-0.04	-0.0941667	0.0452236	0.795018	20.9371	3.97561	-0.105595	0.151824	0.151824	1.627	1.441	1.735	2.015	2.039	2.61	2.655	3.114	3.649	3.534
Akap10:61686523.7	Akap10:61686523	Akap10	Proximal	chr11	61686468	61686523	0.11	0.17	0.15	0.08	0.1	0.21	0.17	0.17	0.11	0.2	0.11	0.17	0.145833	-0.02	-0.11	0.03	-0.26	-0.3	0.01	0.07	0.04	-0.29	-0.22	-0.04	-0.04	-0.0941667	0.0452236	0.795018	20.9371	3.97561	-0.105595	0.151824	0.151824	1.627	1.441	1.735	2.015	2.039	2.61	2.655	3.114	3.649	3.534
Aldh5a1:25003635.1	Aldh5a1:25003635	Aldh5a1	Distal	chr13	24999459	25003635	0.45	0.65	0.76	0.73	0.79	0.69	0.64	0.61	0.71	0.56	0.75	0.79	0.6775	-0.18	-0.45	-0.69	-0.63	-0.72	-0.53	-0.4	-0.42	-0.57	-0.44	-0.64	-0.71	-0.531667	0.0333159	0.676354	26.6667	1.15378	-0.528336	0.15585	0.15585	3.174	4.254	5.404	6.83	6.877	8.845	8.823	9.153	9.659	9.117
Aldh5a1:25003635.4	Aldh5a1:25003635	Aldh5a1	Proximal	chr13	25003320	25003635	0.27	0.2	0.07	0.1	0.07	0.16	0.24	0.19	0.14	0.12	0.11	0.08	0.145833	-0.18	-0.45	-0.69	-0.63	-0.72	-0.53	-0.4	-0.42	-0.57	-0.44	-0.64	-0.71	-0.531667	0.0333159	0.676354	26.6667	1.15378	-0.528336	0.15585	0.15585	3.174	4.254	5.404	6.83	6.877	8.845	8.823	9.153	9.659	9.117
Amfr:96497214.2	Amfr:96497214	Amfr	Distal	chr8	96495702	96497214	0.49	0.36	0.12	0.17	0.24	0.59	0.3	0.34	0.15	0.25	0.65	0.33	0.3325	-0.13	0.17	0.59	0.58	0.36	-0.33	0.27	0.19	0.58	0.33	-0.45	0.21	0.1975	0.000347536	0.0726785	20.2045	10.313	0.243011	0.390569	0.390569	27.311	26.455	28.279	32.174	33.417	30.89	40.997	41.596	41.971	41.693
Amfr:96497214.3	Amfr:96497214	Amfr	Proximal	chr8	96495823	96497214	0.36	0.53	0.71	0.75	0.6	0.26	0.57	0.53	0.73	0.58	0.2	0.54	0.53	-0.13	0.17	0.59	0.58	0.36	-0.33	0.27	0.19	0.58	0.33	-0.45	0.21	0.1975	0.000347536	0.0726785	20.2045	10.313	0.243011	0.390569	0.390569	27.311	26.455	28.279	32.174	33.417	30.89	40.997	41.596	41.971	41.693
Ank:27522859.1	Ank:27522859	Ank	Distal	chr15	27522859	27528381	0.04	0.04	0.67	0.73	0.54	0.65	0	0.66	0.78	0.76	0.01	0.57	0.454167	0.65	0.73	-0.57	-0.64	-0.4	-0.56	0.62	-0.54	-0.71	-0.68	0.33	-0.4	-0.180833	0.0198886	0.525277	20.0201	3.24121	-0.247356	0.535577	0.535577	0.334	0.514	0.956	1.104	1.109	1.076	1.417	1.659	2.124	1.765
Ank:27522859.3	Ank:27522859	Ank	Proximal	chr15	27522859	27524664	0.69	0.77	0.1	0.09	0.14	0.09	0.62	0.12	0.07	0.08	0.34	0.17	0.273333	0.65	0.73	-0.57	-0.64	-0.4	-0.56	0.62	-0.54	-0.71	-0.68	0.33	-0.4	-0.180833	0.0198886	0.525277	20.0201	3.24121	-0.247356	0.535577	0.535577	0.334	0.514	0.956	1.104	1.109	1.076	1.417	1.659	2.124	1.765
Ankhd1:36760530.1	Ankhd1:36760530	Ankhd1	Distal	chr18	36760530	36770640	0.76	0.83	0.85	0.77	0.71	0.8	0.86	0.85	0.86	0.81	0.83	0.84	0.814167	-0.52	-0.66	-0.7	-0.54	-0.42	-0.6	-0.72	-0.7	-0.72	-0.62	-0.66	-0.68	-0.628333	0.0264994	0.600819	20.6447	16.8158	-0.628246	0.100352	0.100352	3.412	3.267	5.259	5.541	5.391	6.736	7.708	8.375	9.58	9.662
Ankhd1:36760530.2	Ankhd1:36760530	Ankhd1	Proximal	chr18	36760530	36760648	0.24	0.17	0.15	0.23	0.29	0.2	0.14	0.15	0.14	0.19	0.17	0.16	0.185833	-0.52	-0.66	-0.7	-0.54	-0.42	-0.6	-0.72	-0.7	-0.72	-0.62	-0.66	-0.68	-0.628333	0.0264994	0.600819	20.6447	16.8158	-0.628246	0.100352	0.100352	3.412	3.267	5.259	5.541	5.391	6.736	7.708	8.375	9.58	9.662
Anp32a:62193252.1	Anp32a:62193252	Anp32a	Distal	chr9	62193252	62196652	0.36	0.3	0.79	0.61	0.46	0.36	0.2	0.52	0.55	0.54	0.11	0.29	0.424167	0.28	0.4	-0.58	-0.22	0.08	0.28	0.6	-0.04	-0.1	-0.08	0.78	0.42	0.151667	0.00217772	0.185374	21.7621	21.6266	0.115192	0.399147	0.399147	3.945	2.909	3.45	2.742	4.135	6.955	8.429	8.748	5.042	4.3
Anp32a:62193252.2	Anp32a:62193252	Anp32a	Proximal	chr9	62193252	62194558	0.64	0.7	0.21	0.39	0.54	0.64	0.8	0.48	0.45	0.46	0.89	0.71	0.575833	0.28	0.4	-0.58	-0.22	0.08	0.28	0.6	-0.04	-0.1	-0.08	0.78	0.42	0.151667	0.00217772	0.185374	21.7621	21.6266	0.115192	0.399147	0.399147	3.945	2.909	3.45	2.742	4.135	6.955	8.429	8.748	5.042	4.3
Anxa5:36348328.3	Anxa5:36348328	Anxa5	Distal	chr3	36347845	36348328	0.6	0.55	0.25	0.22	0.25	0.4	0.52	0.4	0.39	0.13	0.31	0.31	0.360833	-0.28	-0.2	0.33	0.5	0.31	0.09	-0.13	0.14	0.15	0.61	0.3	0.34	0.18	0.000677254	0.0938868	24.3414	13.0515	0.177006	0.299143	0.299143	4.518	3.882	6.239	5.635	5.409	6.971	12.673	12.754	10.935	11.64
Anxa5:36348328.4	Anxa5:36348328	Anxa5	Proximal	chr3	36347882	36348328	0.32	0.35	0.58	0.72	0.56	0.49	0.39	0.54	0.54	0.74	0.61	0.65	0.540833	-0.28	-0.2	0.33	0.5	0.31	0.09	-0.13	0.14	0.15	0.61	0.3	0.34	0.18	0.000677254	0.0938868	24.3414	13.0515	0.177006	0.299143	0.299143	4.518	3.882	6.239	5.635	5.409	6.971	12.673	12.754	10.935	11.64
Ar:95512064.1	Ar:95512064	Ar	Distal	chrX	95512064	95518554	0	0.56	0.49	0.39	0.38	0.56	0.5	0.73	0.48	0.45	0.38	0.6	0.46	0	-0.36	-0.34	-0.1	0.08	-0.34	-0.23	-0.65	-0.23	-0.12	-0.29	-0.53	-0.259167	0.0165889	0.484877	20.3368	15.9309	-0.250244	0.228715	0.228715	#N/A	#N/A	#N/A	#N/A	#N/A	#N/A	#N/A	#N/A	#N/A	#N/A
Ar:95512064.2	Ar:95512064	Ar	Proximal	chrX	95512064	95518343	0	0.2	0.15	0.29	0.46	0.22	0.27	0.08	0.25	0.33	0.09	0.07	0.200833	0	-0.36	-0.34	-0.1	0.08	-0.34	-0.23	-0.65	-0.23	-0.12	-0.29	-0.53	-0.259167	0.0165889	0.484877	20.3368	15.9309	-0.250244	0.228715	0.228715	#N/A	#N/A	#N/A	#N/A	#N/A	#N/A	#N/A	#N/A	#N/A	#N/A
Arpc5:154621390.1	Arpc5:154621390	Arpc5	Distal	chr1	154621390	154622710	0.77	0.74	0.89	0.9	0.83	0.71	0.68	0.72	0.87	0.78	0.86	0.68	0.785833	-0.66	-0.59	-0.86	-0.86	-0.78	-0.61	-0.42	-0.57	-0.81	-0.63	-0.82	-0.45	-0.671667	0.0147517	0.467812	25.3653	24.1649	-0.662972	0.173908	0.173908	17.533	13.88	16.696	20.838	19.213	22.069	42.29	43.186	41.029	43.944
Arpc5:154621390.2	Arpc5:154621390	Arpc5	Proximal	chr1	154621390	154621807	0.11	0.15	0.03	0.04	0.05	0.1	0.26	0.15	0.06	0.15	0.04	0.23	0.114167	-0.66	-0.59	-0.86	-0.86	-0.78	-0.61	-0.42	-0.57	-0.81	-0.63	-0.82	-0.45	-0.671667	0.0147517	0.467812	25.3653	24.1649	-0.662972	0.173908	0.173908	17.533	13.88	16.696	20.838	19.213	22.069	42.29	43.186	41.029	43.944
Atg2b:106855513.1	Atg2b:106855513	Atg2b	Distal	chr12	106851749	106855513	0	0.25	0.14	0.19	0.05	0.14	0.38	0.29	0.23	0.12	0.17	0.36	0.193333	0	0.13	0.03	0.18	0.46	0.35	-0.11	0.04	0.25	0.46	0.07	-0.17	0.140833	0.00436227	0.293166	20.6047	15.503	0.152694	0.23759	0.23759	1.538	2.005	3.131	3.054	2.865	3.816	3.29	4.043	4.687	4.29
Atg2b:106855513.2	Atg2b:106855513	Atg2b	Proximal	chr12	106854346	106855513	0	0.38	0.17	0.37	0.51	0.49	0.27	0.33	0.48	0.58	0.24	0.19	0.334167	0	0.13	0.03	0.18	0.46	0.35	-0.11	0.04	0.25	0.46	0.07	-0.17	0.140833	0.00436227	0.293166	20.6047	15.503	0.152694	0.23759	0.23759	1.538	2.005	3.131	3.054	2.865	3.816	3.29	4.043	4.687	4.29
Atp5o:91925636.1	Atp5o:91925636	Atp5o	Distal	chr16	91925459	91925636	0.9	0.87	0.79	0.78	0.82	0.91	0.95	0.95	0.85	0.91	0.86	0.9	0.874167	-0.8	-0.74	-0.58	-0.56	-0.64	-0.82	-0.9	-0.9	-0.7	-0.82	-0.72	-0.8	-0.748333	0.00845329	0.372867	27.4627	11.2693	-0.762297	0.134435	0.134435	11.306	9.51	9.307	15.087	11.776	13.554	23.568	23.172	25.222	25.143
Atp5o:91925636.2	Atp5o:91925636	Atp5o	Proximal	chr16	91925563	91925636	0.1	0.13	0.21	0.22	0.18	0.09	0.05	0.05	0.15	0.09	0.14	0.1	0.125833	-0.8	-0.74	-0.58	-0.56	-0.64	-0.82	-0.9	-0.9	-0.7	-0.82	-0.72	-0.8	-0.748333	0.00845329	0.372867	27.4627	11.2693	-0.762297	0.134435	0.134435	11.306	9.51	9.307	15.087	11.776	13.554	23.568	23.172	25.222	25.143
Atp8b1:64691218.1	Atp8b1:64691218	Atp8b1	Distal	chr18	64688647	64691218	0.55	0.37	0.15	0.23	0.13	0.13	0.42	0.63	0.63	0.18	0.18	0.14	0.311667	-0.17	0.18	0.51	0.48	0.68	0.7	0.14	-0.3	-0.32	0.6	0.6	0.67	0.314167	0.00445177	0.293166	26.6667	15.863	0.320498	0.471399	0.471399	1.827	2.139	2.205	2.118	3.251	4.181	4.098	4.273	4.321	3.508
Atp8b1:64691218.2	Atp8b1:64691218	Atp8b1	Proximal	chr18	64688700	64691218	0.38	0.55	0.66	0.71	0.81	0.83	0.56	0.33	0.31	0.78	0.78	0.81	0.625833	-0.17	0.18	0.51	0.48	0.68	0.7	0.14	-0.3	-0.32	0.6	0.6	0.67	0.314167	0.00445177	0.293166	26.6667	15.863	0.320498	0.471399	0.471399	1.827	2.139	2.205	2.118	3.251	4.181	4.098	4.273	4.321	3.508
AU022252:118899132.1	AU022252:118899132	AU022252	Distal	chr4	118898349	118899132	0.39	0.26	0.49	0.68	0.59	0.51	0.53	0.26	0.33	0.62	0.77	0.56	0.499167	-0.26	-0.03	-0.24	-0.6	-0.53	-0.41	-0.4	0.28	0.13	-0.54	-0.7	-0.4	-0.308333	0.00221667	0.185436	23.9758	4.85196	-0.308246	0.380108	0.380108	8.681	9.261	8.08	7.006	7.852	11.552	10.471	11.315	8.958	7.963
AU022252:118899132.2	AU022252:118899132	AU022252	Proximal	chr4	118898614	118899132	0.13	0.23	0.25	0.08	0.06	0.1	0.13	0.54	0.46	0.08	0.07	0.16	0.190833	-0.26	-0.03	-0.24	-0.6	-0.53	-0.41	-0.4	0.28	0.13	-0.54	-0.7	-0.4	-0.308333	0.00221667	0.185436	23.9758	4.85196	-0.308246	0.380108	0.380108	8.681	9.261	8.08	7.006	7.852	11.552	10.471	11.315	8.958	7.963
B4galt1:40754350.1	B4galt1:40754350	B4galt1	Distal	chr4	40751635	40754350	0.45	0.25	0.25	0.21	0.28	0.23	0.38	0.27	0.36	0.5	0.37	0.27	0.318333	-0.35	-0.09	-0.13	0.17	-0.21	-0.06	0.07	0.26	-0.04	-0.32	-0.26	0.03	-0.0775	0.0450089	0.79412	20.0539	8.45086	-0.0657974	0.193555	0.193555	2.365	2.619	3.054	5.005	5.261	5.763	5.14	6.787	8.023	7.144
B4galt1:40754350.5	B4galt1:40754350	B4galt1	Proximal	chr4	40754173	40754350	0.1	0.16	0.12	0.38	0.07	0.17	0.45	0.53	0.32	0.18	0.11	0.3	0.240833	-0.35	-0.09	-0.13	0.17	-0.21	-0.06	0.07	0.26	-0.04	-0.32	-0.26	0.03	-0.0775	0.0450089	0.79412	20.0539	8.45086	-0.0657974	0.193555	0.193555	2.365	2.619	3.054	5.005	5.261	5.763	5.14	6.787	8.023	7.144
Bach1:87729682.3	Bach1:87729682	Bach1	Distal	chr16	87729682	87733592	0.28	0.36	0.53	0.64	0.55	0.51	0.61	0.67	0.77	0.72	0.71	0.68	0.585833	0.02	-0.1	-0.37	-0.51	-0.32	-0.33	-0.48	-0.59	-0.72	-0.66	-0.59	-0.61	-0.438333	0.00674233	0.359492	21.5686	0.668137	-0.451488	0.133836	0.133836	3.255	4.346	9.599	8.816	7.589	6.238	7.032	8.665	14.781	11.972
Bach1:87729682.5	Bach1:87729682	Bach1	Proximal	chr16	87729682	87733385	0.3	0.26	0.16	0.13	0.23	0.18	0.13	0.08	0.05	0.06	0.12	0.07	0.1475	0.02	-0.1	-0.37	-0.51	-0.32	-0.33	-0.48	-0.59	-0.72	-0.66	-0.59	-0.61	-0.438333	0.00674233	0.359492	21.5686	0.668137	-0.451488	0.133836	0.133836	3.255	4.346	9.599	8.816	7.589	6.238	7.032	8.665	14.781	11.972
BC027231:44735829.3	BC027231:44735829	BC027231	Distal	chr16	44735829	44739746	0.21	0.25	0.3	0.4	0.1	0.18	0.15	0.21	0.22	0.22	0.19	0.11	0.211667	0.21	0	-0.04	-0.08	0.2	0.25	0.24	0.22	0.13	0.12	0.03	0.07	0.1125	0.00236521	0.194508	27.972	23.8154	0.132034	0.142455	0.142455	#N/A	#N/A	#N/A	#N/A	#N/A	#N/A	#N/A	#N/A	#N/A	#N/A
BC027231:44735829.4	BC027231:44735829	BC027231	Proximal	chr16	44735829	44739604	0.42	0.25	0.26	0.32	0.3	0.43	0.39	0.43	0.35	0.34	0.22	0.18	0.324167	0.21	0	-0.04	-0.08	0.2	0.25	0.24	0.22	0.13	0.12	0.03	0.07	0.1125	0.00236521	0.194508	27.972	23.8154	0.132034	0.142455	0.142455	#N/A	#N/A	#N/A	#N/A	#N/A	#N/A	#N/A	#N/A	#N/A	#N/A
Bhlhe40:108614473.2	Bhlhe40:108614473	Bhlhe40	Distal	chr6	108614473	108616773	0.5	0.35	0.79	0.7	0.59	0.47	0.29	0.19	0.64	0.82	0.82	0.72	0.573333	-0.4	-0.11	-0.71	-0.52	-0.52	-0.13	0.23	0.53	-0.32	-0.73	-0.71	-0.54	-0.3275	0.00929496	0.382196	27.6577	25.5036	-0.281863	0.465162	0.465162	4.511	7.059	21.005	24.417	25.975	29.664	16.926	28.468	74.28	64.957
Bhlhe40:108614473.3	Bhlhe40:108614473	Bhlhe40	Proximal	chr6	108614473	108616539	0.1	0.24	0.08	0.18	0.07	0.34	0.52	0.72	0.32	0.09	0.11	0.18	0.245833	-0.4	-0.11	-0.71	-0.52	-0.52	-0.13	0.23	0.53	-0.32	-0.73	-0.71	-0.54	-0.3275	0.00929496	0.382196	27.6577	25.5036	-0.281863	0.465162	0.465162	4.511	7.059	21.005	24.417	25.975	29.664	16.926	28.468	74.28	64.957
Bmp2k:97515762.1	Bmp2k:97515762	Bmp2k	Distal	chr5	97515762	97520969	0.28	0.16	0.22	0.21	0.15	0.31	0.21	0.23	0.19	0.2	0.18	0.27	0.2175	0.03	0.06	0.13	0.19	-0.03	-0.1	0.16	0.03	0.27	0.2	0.09	-0.02	0.0841667	0.0416284	0.77092	25.752	8.16178	0.0759195	0.115078	0.115078	0.904	0.887	1.766	1.964	1.841	1.975	1.689	1.689	2.419	2.201
Bmp2k:97515762.3	Bmp2k:97515762	Bmp2k	Proximal	chr5	97515762	97520886	0.31	0.22	0.35	0.4	0.12	0.21	0.37	0.26	0.46	0.4	0.27	0.25	0.301667	0.03	0.06	0.13	0.19	-0.03	-0.1	0.16	0.03	0.27	0.2	0.09	-0.02	0.0841667	0.0416284	0.77092	25.752	8.16178	0.0759195	0.115078	0.115078	0.904	0.887	1.766	1.964	1.841	1.975	1.689	1.689	2.419	2.201
Brf1:114198569.3	Brf1:114198569	Brf1	Distal	chr12	114198254	114198569	0.42	0.38	0.41	0.28	0.12	0.22	0.34	0.28	0.42	0.31	0.09	0.27	0.295	-0.15	-0.08	-0.24	0.15	0.09	0.07	-0.1	-0.13	-0.21	-0.1	0.06	0.18	-0.0383333	0.00877896	0.374836	27.075	17.1891	-0.0295887	0.163519	0.163519	0.848	1.073	1.349	1.015	1.842	1.683	1.93	2.212	1.943	1.414
Brf1:114198569.4	Brf1:114198569	Brf1	Proximal	chr12	114198296	114198569	0.27	0.3	0.17	0.43	0.21	0.29	0.24	0.15	0.21	0.21	0.15	0.45	0.256667	-0.15	-0.08	-0.24	0.15	0.09	0.07	-0.1	-0.13	-0.21	-0.1	0.06	0.18	-0.0383333	0.00877896	0.374836	27.075	17.1891	-0.0295887	0.163519	0.163519	0.848	1.073	1.349	1.015	1.842	1.683	1.93	2.212	1.943	1.414
C2cd2l:44119350.1	C2cd2l:44119350	C2cd2l	Distal	chr9	44116895	44119350	0.33	0.16	0.08	0.06	0.08	0.06	0.14	0.12	0.08	0.03	0.02	0.08	0.103333	0.34	0.68	0.84	0.88	0.84	0.88	0.72	0.76	0.84	0.94	0.96	0.84	0.793333	0.0190447	0.52315	24.4685	13.776	0.79195	0.13194	0.13194	2.422	2.109	2.925	4.457	3.171	2.98	6.088	5.23	8.575	7.921
C2cd2l:44119350.2	C2cd2l:44119350	C2cd2l	Proximal	chr9	44118298	44119350	0.67	0.84	0.92	0.94	0.92	0.94	0.86	0.88	0.92	0.97	0.98	0.92	0.896667	0.34	0.68	0.84	0.88	0.84	0.88	0.72	0.76	0.84	0.94	0.96	0.84	0.793333	0.0190447	0.52315	24.4685	13.776	0.79195	0.13194	0.13194	2.422	2.109	2.925	4.457	3.171	2.98	6.088	5.23	8.575	7.921
Canx:50109837.2	Canx:50109837	Canx	Distal	chr11	50107969	50109837	0.23	0.23	0.26	0.4	0.25	0.19	0.32	0.36	0.22	0.37	0.21	0.2	0.27	0.24	0.03	0.04	0.07	0.24	0.45	0.24	0.15	0.23	0.1	0.46	0.47	0.226667	0.00160962	0.150522	23.7574	20.2593	0.225171	0.157728	0.157728	41.216	35.689	43.367	50.473	55.798	71.203	94.153	94.828	94.732	93.088
Canx:50109837.4	Canx:50109837	Canx	Proximal	chr11	50108145	50109837	0.47	0.26	0.3	0.47	0.49	0.64	0.56	0.51	0.45	0.47	0.67	0.67	0.496667	0.24	0.03	0.04	0.07	0.24	0.45	0.24	0.15	0.23	0.1	0.46	0.47	0.226667	0.00160962	0.150522	23.7574	20.2593	0.225171	0.157728	0.157728	41.216	35.689	43.367	50.473	55.798	71.203	94.153	94.828	94.732	93.088
Ccdc43:102547810.1	Ccdc43:102547810	Ccdc43	Distal	chr11	102546000	102547810	0.38	0.4	0.61	0.4	0.25	0.48	0.64	0.63	0.53	0.38	0.51	0.6	0.484167	-0.26	-0.26	-0.44	-0.25	-0.15	-0.38	-0.52	-0.49	-0.27	-0.05	-0.38	-0.49	-0.328333	0.00388476	0.269269	20.0201	14.6181	-0.313742	0.159705	0.159705	2.62	2.364	2.121	2.599	2.548	3.559	4.494	4.017	4.802	3.462
Ccdc43:102547810.4	Ccdc43:102547810	Ccdc43	Proximal	chr11	102547471	102547810	0.12	0.14	0.17	0.15	0.1	0.1	0.12	0.14	0.26	0.33	0.13	0.11	0.155833	-0.26	-0.26	-0.44	-0.25	-0.15	-0.38	-0.52	-0.49	-0.27	-0.05	-0.38	-0.49	-0.328333	0.00388476	0.269269	20.0201	14.6181	-0.313742	0.159705	0.159705	2.62	2.364	2.121	2.599	2.548	3.559	4.494	4.017	4.802	3.462
Ccdc82:414447.1	Ccdc82:414447	Ccdc82	Distal	chr9_random	414447	417620	0	0.28	0.05	0.21	0.33	0.49	0.48	0.43	0.25	0.24	0.33	0.49	0.298333	0	0.17	0.06	0.35	0.16	-0.3	-0.22	-0.11	0.28	0.3	0.06	-0.26	0.0408333	0.00296385	0.228263	24.4907	9.94369	0.0352471	0.262377	0.262377	2.684	1.658	2.341	2.585	2.759	3.276	3.716	3.437	4.031	4.573
Ccdc82:414447.2	Ccdc82:414447	Ccdc82	Proximal	chr9_random	414447	417453	0	0.45	0.11	0.56	0.49	0.19	0.26	0.32	0.53	0.54	0.39	0.23	0.339167	0	0.17	0.06	0.35	0.16	-0.3	-0.22	-0.11	0.28	0.3	0.06	-0.26	0.0408333	0.00296385	0.228263	24.4907	9.94369	0.0352471	0.262377	0.262377	2.684	1.658	2.341	2.585	2.759	3.276	3.716	3.437	4.031	4.573
Ccdc93:123397767.1	Ccdc93:123397767	Ccdc93	Distal	chr1	123397767	123403037	0.49	0.57	0.73	0.71	0.43	0.54	0.59	0.62	0.63	0.62	0.33	0.57	0.569167	-0.11	-0.33	-0.56	-0.53	0.01	-0.25	-0.34	-0.43	-0.48	-0.45	0.22	-0.29	-0.295	0.00822923	0.372039	22.1017	19.725	-0.31025	0.240271	0.240271	0.721	0.918	1.118	0.908	1.197	1.488	1.533	1.475	1.434	1.253
Ccdc93:123397767.3	Ccdc93:123397767	Ccdc93	Proximal	chr1	123397767	123397946	0.38	0.24	0.17	0.18	0.44	0.29	0.25	0.19	0.15	0.17	0.55	0.28	0.274167	-0.11	-0.33	-0.56	-0.53	0.01	-0.25	-0.34	-0.43	-0.48	-0.45	0.22	-0.29	-0.295	0.00822923	0.372039	22.1017	19.725	-0.31025	0.240271	0.240271	0.721	0.918	1.118	0.908	1.197	1.488	1.533	1.475	1.434	1.253
Cdc42bpa:182092166.1	Cdc42bpa:182092166	Cdc42bpa	Distal	chr1	182092166	182095734	0.63	0.58	0.58	0.67	0.73	0.74	0.83	0.79	0.65	0.56	0.71	0.8	0.689167	-0.49	-0.43	-0.41	-0.6	-0.64	-0.65	-0.77	-0.73	-0.53	-0.39	-0.64	-0.72	-0.583333	0.00455059	0.294393	27.7808	5.74089	-0.599653	0.131905	0.131905	0.828	0.952	1.47	1.621	1.495	2.083	2.718	3.033	2.978	2.844
Cdc42bpa:182092166.3	Cdc42bpa:182092166	Cdc42bpa	Proximal	chr1	182092166	182092641	0.14	0.15	0.17	0.07	0.09	0.09	0.06	0.06	0.12	0.17	0.07	0.08	0.105833	-0.49	-0.43	-0.41	-0.6	-0.64	-0.65	-0.77	-0.73	-0.53	-0.39	-0.64	-0.72	-0.583333	0.00455059	0.294393	27.7808	5.74089	-0.599653	0.131905	0.131905	0.828	0.952	1.47	1.621	1.495	2.083	2.718	3.033	2.978	2.844
Cdk8:147113152.1	Cdk8:147113152	Cdk8	Distal	chr5	147113152	147114450	0.45	0.66	0.56	0.44	0.25	0.32	0.26	0.68	0.57	0.35	0.28	0.21	0.419167	0.1	-0.32	-0.12	0.12	0.5	0.36	0.48	-0.36	-0.14	0.3	0.44	0.58	0.161667	0.000151633	0.0652538	25.487	18.591	0.177326	0.37195	0.37195	10480.8	10487.7	10299.4	8353.65	10168	10477	10102.6	8845.25	11920.7	6670.74
Cdk8:147113152.2	Cdk8:147113152	Cdk8	Proximal	chr5	147113152	147114415	0.55	0.34	0.44	0.56	0.75	0.68	0.74	0.32	0.43	0.65	0.72	0.79	0.580833	0.1	-0.32	-0.12	0.12	0.5	0.36	0.48	-0.36	-0.14	0.3	0.44	0.58	0.161667	0.000151633	0.0652538	25.487	18.591	0.177326	0.37195	0.37195	10480.8	10487.7	10299.4	8353.65	10168	10477	10102.6	8845.25	11920.7	6670.74
Celf2:6466721.3	Celf2:6466721	Celf2	Distal	chr2	6462915	6466721	0.58	0.34	0.35	0.66	0.8	0.69	0.63	0.68	0.28	0.6	0.66	0.52	0.565833	-0.48	-0.16	-0.13	-0.49	-0.7	-0.57	-0.5	-0.51	0.25	-0.36	-0.49	-0.41	-0.379167	0.0275903	0.619759	26.6433	6.46461	-0.404464	0.272581	0.272581	0.665	0.624	0.956	1.336	1.216	1.334	1.232	1.727	2.137	2.422
Celf2:6466721.6	Celf2:6466721	Celf2	Proximal	chr2	6466450	6466721	0.1	0.18	0.22	0.17	0.1	0.12	0.13	0.17	0.53	0.24	0.17	0.11	0.186667	-0.48	-0.16	-0.13	-0.49	-0.7	-0.57	-0.5	-0.51	0.25	-0.36	-0.49	-0.41	-0.379167	0.0275903	0.619759	26.6433	6.46461	-0.404464	0.272581	0.272581	0.665	0.624	0.956	1.336	1.216	1.334	1.232	1.727	2.137	2.422
Chchd3:32742926.1	Chchd3:32742926	Chchd3	Distal	chr6	32742217	32742926	0.51	0.5	0.52	0.35	0.41	0.36	0.56	0.46	0.46	0.4	0.42	0.61	0.463333	-0.02	0	-0.04	0.3	0.18	0.28	-0.12	0.08	0.08	0.2	0.16	-0.22	0.0733333	0.0231194	0.560753	20.6637	15.5375	0.0814718	0.171056	0.171056	1.642	1.339	2.405	3.698	2.994	3.511	3.77	4.163	4.917	5.725
Chchd3:32742926.2	Chchd3:32742926	Chchd3	Proximal	chr6	32742641	32742926	0.49	0.5	0.48	0.65	0.59	0.64	0.44	0.54	0.54	0.6	0.58	0.39	0.536667	-0.02	0	-0.04	0.3	0.18	0.28	-0.12	0.08	0.08	0.2	0.16	-0.22	0.0733333	0.0231194	0.560753	20.6637	15.5375	0.0814718	0.171056	0.171056	1.642	1.339	2.405	3.698	2.994	3.511	3.77	4.163	4.917	5.725
Chordc1:18117222.5	Chordc1:18117222	Chordc1	Distal	chr9	18117222	18118445	0.37	0.45	0.36	0.27	0.13	0.29	0.53	0.38	0.27	0.21	0.29	0.46	0.334167	-0.25	-0.26	-0.12	-0.2	0.23	-0.16	-0.38	-0.26	0	0.13	0.01	-0.26	-0.126667	0.00126911	0.125668	22.1581	14.8717	-0.119504	0.212571	0.212571	5.303	4.832	4.537	12.063	9.269	11.13	16.555	11.923	17.432	26.869
Chordc1:18117222.6	Chordc1:18117222	Chordc1	Proximal	chr9	18117222	18118210	0.12	0.19	0.24	0.07	0.36	0.13	0.15	0.12	0.27	0.34	0.3	0.2	0.2075	-0.25	-0.26	-0.12	-0.2	0.23	-0.16	-0.38	-0.26	0	0.13	0.01	-0.26	-0.126667	0.00126911	0.125668	22.1581	14.8717	-0.119504	0.212571	0.212571	5.303	4.832	4.537	12.063	9.269	11.13	16.555	11.923	17.432	26.869
Clasp1:120503485.1	Clasp1:120503485	Clasp1	Distal	chr1	120503485	120506039	0.38	0.15	0.03	0.27	0.19	0.28	0.29	0.19	0.48	0.5	0.13	0.17	0.255	-0.18	0.44	0.63	0.08	-0.02	-0.05	0.13	0.15	-0.33	-0.4	0.01	0.08	0.045	0.0131865	0.447419	20.1924	7.47063	0.0514575	0.256371	0.256371	3.587	3.784	3.635	3.685	3.995	3.249	3.377	4.188	3.413	3.55
Clasp1:120503485.2	Clasp1:120503485	Clasp1	Proximal	chr1	120503485	120504316	0.2	0.59	0.66	0.35	0.17	0.23	0.42	0.34	0.15	0.1	0.14	0.25	0.3	-0.18	0.44	0.63	0.08	-0.02	-0.05	0.13	0.15	-0.33	-0.4	0.01	0.08	0.045	0.0131865	0.447419	20.1924	7.47063	0.0514575	0.256371	0.256371	3.587	3.784	3.635	3.685	3.995	3.249	3.377	4.188	3.413	3.55
Clasp2:113827113.3	Clasp2:113827113	Clasp2	Distal	chr9	113827113	113828873	0.24	0.28	0.24	0.3	0.29	0.27	0.22	0.24	0.26	0.23	0.3	0.21	0.256667	0.15	0.12	0.21	-0.01	-0.02	0.08	0.31	0.24	0.19	0.12	-0.08	0.08	0.115833	0.0052607	0.327243	24.0342	4.38461	0.115811	0.137969	0.137969	0.93	0.934	1.415	1.292	1.449	1.377	1.586	1.809	2.318	1.809
Clasp2:113827113.4	Clasp2:113827113	Clasp2	Proximal	chr9	113827113	113828815	0.39	0.4	0.45	0.29	0.27	0.35	0.53	0.48	0.45	0.35	0.22	0.29	0.3725	0.15	0.12	0.21	-0.01	-0.02	0.08	0.31	0.24	0.19	0.12	-0.08	0.08	0.115833	0.0052607	0.327243	24.0342	4.38461	0.115811	0.137969	0.137969	0.93	0.934	1.415	1.292	1.449	1.377	1.586	1.809	2.318	1.809
Clk4:51085525.1	Clk4:51085525	Clk4	Distal	chr11	51085525	51086312	0.59	0.82	0.8	0.32	0.15	0.83	0.81	0.87	0.55	0.6	0.81	0.8	0.6625	-0.18	-0.64	-0.6	0.36	0.7	-0.66	-0.62	-0.74	-0.1	-0.2	-0.62	-0.6	-0.325	0.0440965	0.792958	20.2639	14.6984	-0.28247	0.506626	0.506626	7.369	6.129	12.106	12.007	11.301	13.965	16.272	19.504	25.068	26.165
Clk4:51085525.2	Clk4:51085525	Clk4	Proximal	chr11	51085525	51085650	0.41	0.18	0.2	0.68	0.85	0.17	0.19	0.13	0.45	0.4	0.19	0.2	0.3375	-0.18	-0.64	-0.6	0.36	0.7	-0.66	-0.62	-0.74	-0.1	-0.2	-0.62	-0.6	-0.325	0.0440965	0.792958	20.2639	14.6984	-0.28247	0.506626	0.506626	7.369	6.129	12.106	12.007	11.301	13.965	16.272	19.504	25.068	26.165
Clk4:51094779.1	Clk4:51094779	Clk4	Distal	chr11	51094779	51095266	0.5	0	0.28	0.3	0.35	0.5	0.58	0.5	0.49	0.33	0.5	0.54	0.405833	-0.35	0	0.07	0	-0.17	-0.35	-0.46	-0.3	-0.27	-0.13	-0.29	-0.4	-0.220833	0.000474954	0.0857936	26.9256	9.53368	-0.244133	0.204921	0.204921	7.369	6.129	12.106	12.007	11.301	13.965	16.272	19.504	25.068	26.165
Clk4:51094779.4	Clk4:51094779	Clk4	Proximal	chr11	51094779	51095032	0.15	0	0.35	0.3	0.18	0.15	0.12	0.2	0.22	0.2	0.21	0.14	0.185	-0.35	0	0.07	0	-0.17	-0.35	-0.46	-0.3	-0.27	-0.13	-0.29	-0.4	-0.220833	0.000474954	0.0857936	26.9256	9.53368	-0.244133	0.204921	0.204921	7.369	6.129	12.106	12.007	11.301	13.965	16.272	19.504	25.068	26.165
Cln8:14896531.1	Cln8:14896531	Cln8	Distal	chr8	14896531	14901720	0.14	0.27	0.21	0.28	0.28	0.29	0.25	0.18	0.31	0.3	0.33	0.22	0.255	0.17	0.12	0.09	-0.13	-0.11	-0.1	0.05	0.13	0	-0.05	-0.22	-0.01	-0.005	0.000103236	0.0652538	25.3949	2.41522	-0.00393398	0.135144	0.135144	4.683	4.432	6.191	6.061	5.806	5.986	5.787	5.774	9.173	7.69
Cln8:14896531.3	Cln8:14896531	Cln8	Proximal	chr8	14896531	14898019	0.31	0.39	0.3	0.15	0.17	0.19	0.3	0.31	0.31	0.25	0.11	0.21	0.25	0.17	0.12	0.09	-0.13	-0.11	-0.1	0.05	0.13	0	-0.05	-0.22	-0.01	-0.005	0.000103236	0.0652538	25.3949	2.41522	-0.00393398	0.135144	0.135144	4.683	4.432	6.191	6.061	5.806	5.986	5.787	5.774	9.173	7.69
Cnot7:41579469.1	Cnot7:41579469	Cnot7	Distal	chr8	41577895	41579469	0.4	0.44	0.26	0.13	0.12	0.57	0.38	0.36	0.28	0.29	0.53	0.58	0.361667	-0.28	-0.29	0.15	0.5	0.32	-0.34	0.12	0.13	0.34	0.28	-0.27	-0.31	0.0291667	0.000169554	0.0652538	20.1359	12.95	0.0745802	0.358865	0.358865	4.884	5.167	7.333	9.021	8.68	8.584	13.117	14.693	15.622	17.886
Cnot7:41579469.2	Cnot7:41579469	Cnot7	Proximal	chr8	41577955	41579469	0.12	0.15	0.41	0.63	0.44	0.23	0.5	0.49	0.62	0.57	0.26	0.27	0.390833	-0.28	-0.29	0.15	0.5	0.32	-0.34	0.12	0.13	0.34	0.28	-0.27	-0.31	0.0291667	0.000169554	0.0652538	20.1359	12.95	0.0745802	0.358865	0.358865	4.884	5.167	7.333	9.021	8.68	8.584	13.117	14.693	15.622	17.886
Crcp:130535575.1	Crcp:130535575	Crcp	Distal	chr5	130535575	130536672	0.73	0.45	0.34	0.52	0.82	0.79	0.83	0.69	0.54	0.71	0.8	0.74	0.663333	-0.56	0.04	0.13	-0.1	-0.71	-0.65	-0.73	-0.45	-0.13	-0.49	-0.66	-0.58	-0.4075	0.00566589	0.327273	25.6734	8.24097	-0.429729	0.323153	0.323153	0.915	1.253	1.736	1.824	1.973	1.99	1.999	2.538	2.924	2.978
Crcp:130535575.3	Crcp:130535575	Crcp	Proximal	chr5	130535575	130535869	0.17	0.49	0.47	0.42	0.11	0.14	0.1	0.24	0.41	0.22	0.14	0.16	0.255833	-0.56	0.04	0.13	-0.1	-0.71	-0.65	-0.73	-0.45	-0.13	-0.49	-0.66	-0.58	-0.4075	0.00566589	0.327273	25.6734	8.24097	-0.429729	0.323153	0.323153	0.915	1.253	1.736	1.824	1.973	1.99	1.999	2.538	2.924	2.978
Creb1:64643808.3	Creb1:64643808	Creb1	Distal	chr1	64643808	64649544	0.14	0.22	0.17	0.37	0.23	0.3	0.14	0.17	0.48	0.25	0.43	0.25	0.2625	0.08	-0.02	-0.04	-0.17	-0.11	-0.15	0.16	0	-0.33	-0.14	-0.35	0.04	-0.0858333	0.0445133	0.794039	23.2138	1.49018	-0.0895	0.144305	0.144305	2.048	1.629	2.108	3.326	3.135	3.692	4.379	4.861	5.437	5.458
Creb1:64643808.4	Creb1:64643808	Creb1	Proximal	chr1	64643808	64649434	0.22	0.2	0.13	0.2	0.12	0.15	0.3	0.17	0.15	0.11	0.08	0.29	0.176667	0.08	-0.02	-0.04	-0.17	-0.11	-0.15	0.16	0	-0.33	-0.14	-0.35	0.04	-0.0858333	0.0445133	0.794039	23.2138	1.49018	-0.0895	0.144305	0.144305	2.048	1.629	2.108	3.326	3.135	3.692	4.379	4.861	5.437	5.458
Creb3l3:80547879.1	Creb3l3:80547879	Creb3l3	Distal	chr10	80547048	80547879	0.4	0.6	0.36	0.16	0.08	0.15	0.28	0.4	0.19	0.2	0.13	0.08	0.2525	0.02	-0.33	-0.19	0.54	0.69	0.5	0.36	0.01	0.56	0.11	0.66	0.76	0.3075	0.0161849	0.484877	26.1844	17.3262	0.320172	0.322995	0.322995	16.476	22.163	19.933	17.566	19.219	27.001	29.453	27.997	31.909	27.938
Creb3l3:80547879.2	Creb3l3:80547879	Creb3l3	Proximal	chr10	80547074	80547879	0.42	0.27	0.17	0.7	0.77	0.65	0.64	0.41	0.75	0.31	0.79	0.84	0.56	0.02	-0.33	-0.19	0.54	0.69	0.5	0.36	0.01	0.56	0.11	0.66	0.76	0.3075	0.0161849	0.484877	26.1844	17.3262	0.320172	0.322995	0.322995	16.476	22.163	19.933	17.566	19.219	27.001	29.453	27.997	31.909	27.938
Cript:87434318.4	Cript:87434318	Cript	Distal	chr17	87434318	87435149	0.14	0.22	0.32	0.23	0.33	0.12	0.27	0.15	0.24	0.33	0.16	0.11	0.218333	0.39	0.15	-0.01	0.02	0.01	0.4	0	0.3	-0.14	-0.16	0.04	0.18	0.0983333	0.0348317	0.693419	25.4915	23.2953	0.109336	0.183102	0.183102	6.788	5.841	6.632	7.728	6.306	6.733	12.203	10.8	10.496	13.146
Cript:87434318.5	Cript:87434318	Cript	Proximal	chr17	87434318	87435047	0.53	0.37	0.31	0.25	0.34	0.52	0.27	0.45	0.1	0.17	0.2	0.29	0.316667	0.39	0.15	-0.01	0.02	0.01	0.4	0	0.3	-0.14	-0.16	0.04	0.18	0.0983333	0.0348317	0.693419	25.4915	23.2953	0.109336	0.183102	0.183102	6.788	5.841	6.632	7.728	6.306	6.733	12.203	10.8	10.496	13.146
Crlf3:79861239.1	Crlf3:79861239	Crlf3	Distal	chr11	79860000	79861239	0.72	0.74	0.23	0.4	0.71	0.69	0.83	0.87	0.51	0.55	0.81	0.88	0.661667	-0.44	-0.48	0.54	0.2	-0.42	-0.38	-0.66	-0.74	-0.02	-0.1	-0.62	-0.76	-0.323333	0.031194	0.658059	24.025	10.8778	-0.323782	0.422468	0.422468	1.121	0.904	1.506	1.933	1.737	1.77	1.904	1.8	2.358	2.335
Crlf3:79861239.2	Crlf3:79861239	Crlf3	Proximal	chr11	79860210	79861239	0.28	0.26	0.77	0.6	0.29	0.31	0.17	0.13	0.49	0.45	0.19	0.12	0.338333	-0.44	-0.48	0.54	0.2	-0.42	-0.38	-0.66	-0.74	-0.02	-0.1	-0.62	-0.76	-0.323333	0.031194	0.658059	24.025	10.8778	-0.323782	0.422468	0.422468	1.121	0.904	1.506	1.933	1.737	1.77	1.904	1.8	2.358	2.335
Csl:99222292.4	Csl:99222292	Csl	Distal	chr10	99220338	99222292	0.4	0.41	0.37	0.33	0.39	0.42	0.5	0.45	0.38	0.39	0.39	0.43	0.405	-0.24	-0.17	0.03	0.06	-0.09	-0.07	-0.23	-0.14	0.01	-0.06	-0.16	-0.15	-0.100833	0.000727863	0.0939019	22.9029	11.8967	-0.0959439	0.110707	0.110707	1.264	2.202	4.094	4.201	3.697	8.325	10.873	11.886	8.219	10.31
Csl:99222292.5	Csl:99222292	Csl	Proximal	chr10	99220364	99222292	0.16	0.24	0.4	0.39	0.3	0.35	0.27	0.31	0.39	0.33	0.23	0.28	0.304167	-0.24	-0.17	0.03	0.06	-0.09	-0.07	-0.23	-0.14	0.01	-0.06	-0.16	-0.15	-0.100833	0.000727863	0.0939019	22.9029	11.8967	-0.0959439	0.110707	0.110707	1.264	2.202	4.094	4.201	3.697	8.325	10.873	11.886	8.219	10.31
Ctbs:146126863.1	Ctbs:146126863	Ctbs	Distal	chr3	146126863	146131276	0.07	0.22	0.07	0.33	0.3	0.34	0.28	0.28	0.15	0.22	0.18	0.34	0.231667	0.09	0.01	0.03	-0.13	-0.11	-0.05	-0.06	0	0.37	-0.01	-0.07	-0.13	-0.005	0.0421536	0.773273	26.6667	4.58244	-0.0134572	0.137129	0.137129	1.686	2.26	4.786	4.29	4.6	3.816	5.292	6.564	8.454	6.997
Ctbs:146126863.3	Ctbs:146126863	Ctbs	Proximal	chr3	146126863	146128040	0.16	0.23	0.1	0.2	0.19	0.29	0.22	0.28	0.52	0.21	0.11	0.21	0.226667	0.09	0.01	0.03	-0.13	-0.11	-0.05	-0.06	0	0.37	-0.01	-0.07	-0.13	-0.005	0.0421536	0.773273	26.6667	4.58244	-0.0134572	0.137129	0.137129	1.686	2.26	4.786	4.29	4.6	3.816	5.292	6.564	8.454	6.997
Cyhr1:76477004.2	Cyhr1:76477004	Cyhr1	Distal	chr15	76474208	76477004	0.16	0.09	0.14	0.23	0.43	0.21	0.22	0.27	0.11	0.46	0.27	0.19	0.231667	0.54	0.63	0.65	0.39	-0.03	0.23	0.32	0.37	0.58	-0.12	-0.03	0.23	0.313333	0.00885658	0.374836	22.63	5.89942	0.316952	0.257188	0.257188	10.29	8.289	9.993	10.701	8.712	9.913	17.449	10.122	14.381	14.321
Cyhr1:76477004.3	Cyhr1:76477004	Cyhr1	Proximal	chr15	76476197	76477004	0.7	0.72	0.79	0.62	0.4	0.44	0.54	0.64	0.69	0.34	0.24	0.42	0.545	0.54	0.63	0.65	0.39	-0.03	0.23	0.32	0.37	0.58	-0.12	-0.03	0.23	0.313333	0.00885658	0.374836	22.63	5.89942	0.316952	0.257188	0.257188	10.29	8.289	9.993	10.701	8.712	9.913	17.449	10.122	14.381	14.321
Cyp2c54:40144657.1	Cyp2c54:40144657	Cyp2c54	Distal	chr19	40138250	40144657	0.86	0.78	0.51	0.57	0.88	0.76	0.8	0.6	0.38	0.76	0.79	0.69	0.698333	-0.72	-0.56	-0.02	-0.14	-0.76	-0.52	-0.6	-0.2	0.24	-0.52	-0.58	-0.38	-0.396667	0.00815465	0.372039	20.31	9.40407	-0.362995	0.353951	0.353951	28.546	16.636	23.865	21.407	27.152	32.111	38.618	31.814	28.43	35.44
Cyp2c54:40144657.2	Cyp2c54:40144657	Cyp2c54	Proximal	chr19	40140047	40144657	0.14	0.22	0.49	0.43	0.12	0.24	0.2	0.4	0.62	0.24	0.21	0.31	0.301667	-0.72	-0.56	-0.02	-0.14	-0.76	-0.52	-0.6	-0.2	0.24	-0.52	-0.58	-0.38	-0.396667	0.00815465	0.372039	20.31	9.40407	-0.362995	0.353951	0.353951	28.546	16.636	23.865	21.407	27.152	32.111	38.618	31.814	28.43	35.44
Cyth3:144468702.1	Cyth3:144468702	Cyth3	Distal	chr5	144468702	144471119	0.14	0.11	0.39	0.55	0.22	0.22	0.28	0.17	0.42	0.34	0.14	0.15	0.260833	0.06	0.07	-0.26	-0.47	-0.03	0.01	-0.09	0.08	-0.29	-0.25	0	0.08	-0.0908333	0.00984229	0.397957	22.6564	0.766854	-0.101394	0.198593	0.198593	#N/A	#N/A	#N/A	#N/A	#N/A	#N/A	#N/A	#N/A	#N/A	#N/A
Cyth3:144468702.2	Cyth3:144468702	Cyth3	Proximal	chr5	144468702	144471078	0.2	0.18	0.13	0.08	0.19	0.23	0.19	0.25	0.13	0.09	0.14	0.23	0.17	0.06	0.07	-0.26	-0.47	-0.03	0.01	-0.09	0.08	-0.29	-0.25	0	0.08	-0.0908333	0.00984229	0.397957	22.6564	0.766854	-0.101394	0.198593	0.198593	#N/A	#N/A	#N/A	#N/A	#N/A	#N/A	#N/A	#N/A	#N/A	#N/A
D19Ertd737e:60275390.1	D19Ertd737e:60275390	D19Ertd737e	Distal	chr19	60269156	60275390	0.13	0.08	0.26	0.37	0.41	0.17	0.08	0.15	0.17	0.18	0.16	0.14	0.191667	-0.07	0.08	-0.18	-0.3	-0.3	-0.08	0.11	-0.04	-0.03	-0.05	0.05	0.05	-0.0633333	0.0490573	0.832807	20.1224	4.333	-0.0759281	0.131106	0.131106	0.747	0.765	1.446	1.637	1.631	2.003	2.196	2.669	3.483	2.519
D19Ertd737e:60275390.10	D19Ertd737e:60275390	D19Ertd737e	Proximal	chr19	60274906	60275390	0.06	0.16	0.08	0.07	0.11	0.09	0.19	0.11	0.14	0.13	0.21	0.19	0.128333	-0.07	0.08	-0.18	-0.3	-0.3	-0.08	0.11	-0.04	-0.03	-0.05	0.05	0.05	-0.0633333	0.0490573	0.832807	20.1224	4.333	-0.0759281	0.131106	0.131106	0.747	0.765	1.446	1.637	1.631	2.003	2.196	2.669	3.483	2.519
Dap3:88727835.3	Dap3:88727835	Dap3	Distal	chr3	88727517	88727835	0.49	0.5	0.22	0.29	0.16	0.26	0.4	0.28	0.2	0.36	0.33	0.55	0.336667	-0.08	-0.24	0.47	0.35	0.56	0.4	0.12	0.38	0.54	0.23	0.12	-0.19	0.221667	0.0473525	0.820551	20.2045	14.1689	0.247415	0.255885	0.255885	2.737	2.079	2.836	2.577	2.915	3.726	4.055	4.652	4.61	4.287
Dap3:88727835.4	Dap3:88727835	Dap3	Proximal	chr3	88727557	88727835	0.41	0.26	0.69	0.64	0.72	0.66	0.52	0.66	0.74	0.59	0.45	0.36	0.558333	-0.08	-0.24	0.47	0.35	0.56	0.4	0.12	0.38	0.54	0.23	0.12	-0.19	0.221667	0.0473525	0.820551	20.2045	14.1689	0.247415	0.255885	0.255885	2.737	2.079	2.836	2.577	2.915	3.726	4.055	4.652	4.61	4.287
Dclre1b:103607978.1	Dclre1b:103607978	Dclre1b	Distal	chr3	103604528	103607978	0	0.08	0.09	0.24	0.37	0.28	0.32	0.12	0.32	0.49	0.3	0.05	0.221667	0	0.07	-0.02	-0.09	-0.26	-0.06	-0.07	-0.05	-0.09	-0.37	-0.14	0.19	-0.0741667	0.011574	0.425041	20.2291	5.03785	-0.0851782	0.158151	0.158151	1.172	1.306	1.555	2.153	2.549	1.942	3.179	2.643	2.072	3.163
Dclre1b:103607978.2	Dclre1b:103607978	Dclre1b	Proximal	chr3	103605396	103607978	0	0.15	0.07	0.15	0.11	0.22	0.25	0.07	0.23	0.12	0.16	0.24	0.1475	0	0.07	-0.02	-0.09	-0.26	-0.06	-0.07	-0.05	-0.09	-0.37	-0.14	0.19	-0.0741667	0.011574	0.425041	20.2291	5.03785	-0.0851782	0.158151	0.158151	1.172	1.306	1.555	2.153	2.549	1.942	3.179	2.643	2.072	3.163
Ddx51:111086600.4	Ddx51:111086600	Ddx51	Distal	chr5	111086600	111090755	0.15	0.23	0.14	0.14	0.08	0.05	0.11	0.2	0.07	0.09	0	0.1	0.113333	0.03	-0.11	0.01	0.03	0.14	0.29	0.03	-0.01	0	0.01	0	0.14	0.0466667	0.00626702	0.344768	27.3074	19.2016	0.0587261	0.116523	0.116523	1.694	2.086	2.364	3.038	1.947	2.533	4.689	4.904	4.937	2.267
Ddx51:111086600.8	Ddx51:111086600	Ddx51	Proximal	chr5	111086600	111087217	0.18	0.12	0.15	0.17	0.22	0.34	0.14	0.19	0.07	0.1	0	0.24	0.16	0.03	-0.11	0.01	0.03	0.14	0.29	0.03	-0.01	0	0.01	0	0.14	0.0466667	0.00626702	0.344768	27.3074	19.2016	0.0587261	0.116523	0.116523	1.694	2.086	2.364	3.038	1.947	2.533	4.689	4.904	4.937	2.267
Decr2:26219206.1	Decr2:26219206	Decr2	Distal	chr17	26218153	26219206	0.44	0.58	0.51	0.42	0.42	0.37	0.45	0.52	0.56	0.52	0.57	0.49	0.4875	0.12	-0.16	-0.02	0.16	0.16	0.26	0.1	-0.04	-0.12	-0.04	-0.14	0.02	0.025	0.0378386	0.722806	27.7808	18.9319	0.0419359	0.153115	0.153115	36.088	31.947	42.788	46.135	45.122	58.419	67.023	69.344	73.752	73.212
Decr2:26219206.2	Decr2:26219206	Decr2	Proximal	chr17	26218988	26219206	0.56	0.42	0.49	0.58	0.58	0.63	0.55	0.48	0.44	0.48	0.43	0.51	0.5125	0.12	-0.16	-0.02	0.16	0.16	0.26	0.1	-0.04	-0.12	-0.04	-0.14	0.02	0.025	0.0378386	0.722806	27.7808	18.9319	0.0419359	0.153115	0.153115	36.088	31.947	42.788	46.135	45.122	58.419	67.023	69.344	73.752	73.212
Dnmbp:43922768.1	Dnmbp:43922768	Dnmbp	Distal	chr19	43921005	43922768	0	0.22	0.32	0.3	0.3	0.15	0.21	0.15	0.31	0.27	0.28	0.24	0.229167	1	0.56	0.36	0.4	0.4	0.7	0.58	0.7	0.38	0.46	0.44	0.52	0.541667	0.0394509	0.744808	26.854	25.3601	0.556632	0.185145	0.185145	1.237	1.653	2.163	1.396	2.114	3.189	3.377	3.801	2.89	3.498
Dnmbp:43922768.2	Dnmbp:43922768	Dnmbp	Proximal	chr19	43921310	43922768	1	0.78	0.68	0.7	0.7	0.85	0.79	0.85	0.69	0.73	0.72	0.76	0.770833	1	0.56	0.36	0.4	0.4	0.7	0.58	0.7	0.38	0.46	0.44	0.52	0.541667	0.0394509	0.744808	26.854	25.3601	0.556632	0.185145	0.185145	1.237	1.653	2.163	1.396	2.114	3.189	3.377	3.801	2.89	3.498
Dpy19l4:11193089.1	Dpy19l4:11193089	Dpy19l4	Distal	chr4	11188462	11193089	0.45	0.55	0.49	0.6	0.52	0.47	0.41	0.5	0.69	0.58	0.63	0.56	0.5375	-0.27	-0.4	-0.36	-0.48	-0.33	-0.33	-0.09	-0.29	-0.62	-0.45	-0.49	-0.41	-0.376667	0.0146031	0.466791	27.3826	23.9446	-0.361016	0.131645	0.131645	1.226	1.583	1.839	2.126	2.038	2.384	2.605	2.678	2.514	2.227
Dpy19l4:11193089.4	Dpy19l4:11193089	Dpy19l4	Proximal	chr4	11192898	11193089	0.18	0.15	0.13	0.12	0.19	0.14	0.32	0.21	0.07	0.13	0.14	0.15	0.160833	-0.27	-0.4	-0.36	-0.48	-0.33	-0.33	-0.09	-0.29	-0.62	-0.45	-0.49	-0.41	-0.376667	0.0146031	0.466791	27.3826	23.9446	-0.361016	0.131645	0.131645	1.226	1.583	1.839	2.126	2.038	2.384	2.605	2.678	2.514	2.227
Dst:34364175.1	Dst:34364175	Dst	Distal	chr1	34364175	34365562	0	0.34	0.28	0.28	0.23	0.26	0.49	0.2	0.16	0.21	0.27	0.27	0.249167	0	0.01	0.19	0.29	0.41	0.29	-0.15	0.34	0.52	0.46	0.28	0.29	0.244167	0.0139272	0.457981	20.7645	14.207	0.260386	0.188312	0.188312	0.778	0.972	1.769	2.11	2.103	1.957	1.515	1.817	2.336	2.627
Dst:34364175.2	Dst:34364175	Dst	Proximal	chr1	34364175	34365506	0	0.35	0.47	0.57	0.64	0.55	0.34	0.54	0.68	0.67	0.55	0.56	0.493333	0	0.01	0.19	0.29	0.41	0.29	-0.15	0.34	0.52	0.46	0.28	0.29	0.244167	0.0139272	0.457981	20.7645	14.207	0.260386	0.188312	0.188312	0.778	0.972	1.769	2.11	2.103	1.957	1.515	1.817	2.336	2.627
Dusp19:80470949.5	Dusp19:80470949	Dusp19	Distal	chr2	80470949	80472519	0.11	0.27	0.52	0.17	0.08	0.09	0.32	0.34	0.25	0.08	0.11	0.3	0.22	0.33	-0.01	-0.43	0.12	0.45	0.45	-0.25	-0.18	0	0.2	0.03	0.01	0.06	0.000560413	0.0876154	20.0539	17.275	0.05604	0.32689	0.32689	1.937	1.191	0.968	1.012	1.699	2.113	2.096	2.578	2.445	2.115
Dusp19:80470949.6	Dusp19:80470949	Dusp19	Proximal	chr2	80470949	80471888	0.44	0.26	0.09	0.29	0.53	0.54	0.07	0.16	0.25	0.28	0.14	0.31	0.28	0.33	-0.01	-0.43	0.12	0.45	0.45	-0.25	-0.18	0	0.2	0.03	0.01	0.06	0.000560413	0.0876154	20.0539	17.275	0.05604	0.32689	0.32689	1.937	1.191	0.968	1.012	1.699	2.113	2.096	2.578	2.445	2.115
Dusp28:94804142.1	Dusp28:94804142	Dusp28	Distal	chr1	94804142	94805239	0.06	0.27	0.21	0.17	0.1	0.08	0.1	0.12	0.43	0.24	0.35	0.16	0.190833	0.88	0.46	0.58	0.66	0.8	0.84	0.8	0.76	0.14	0.52	0.3	0.68	0.618333	0.0441259	0.792958	27.8158	20.9269	0.653062	0.246888	0.246888	16.908	6.153	8.578	9.841	14.166	13.858	15.671	13.902	15.419	10.643
Dusp28:94804142.2	Dusp28:94804142	Dusp28	Proximal	chr1	94804142	94805012	0.94	0.73	0.79	0.83	0.9	0.92	0.9	0.88	0.57	0.76	0.65	0.84	0.809167	0.88	0.46	0.58	0.66	0.8	0.84	0.8	0.76	0.14	0.52	0.3	0.68	0.618333	0.0441259	0.792958	27.8158	20.9269	0.653062	0.246888	0.246888	16.908	6.153	8.578	9.841	14.166	13.858	15.671	13.902	15.419	10.643
Dync1li2:106944582.1	Dync1li2:106944582	Dync1li2	Distal	chr8	106941580	106944582	0.27	0.41	0.23	0.66	0.54	0.57	0.23	0.25	0.27	0.36	0.58	0.61	0.415	0.26	0.01	0.45	-0.39	-0.35	-0.25	0.51	0.42	0.39	0.17	-0.26	-0.29	0.0558333	0.0190381	0.52315	26.6547	2.45182	0.0512301	0.411074	0.411074	2.871	3.277	4.044	3.599	4.112	5.704	5.455	6.447	5.926	4.871
Dync1li2:106944582.3	Dync1li2:106944582	Dync1li2	Proximal	chr8	106944406	106944582	0.53	0.42	0.68	0.27	0.19	0.32	0.74	0.67	0.66	0.53	0.32	0.32	0.470833	0.26	0.01	0.45	-0.39	-0.35	-0.25	0.51	0.42	0.39	0.17	-0.26	-0.29	0.0558333	0.0190381	0.52315	26.6547	2.45182	0.0512301	0.411074	0.411074	2.871	3.277	4.044	3.599	4.112	5.704	5.455	6.447	5.926	4.871
E2f3:30002034.1	E2f3:30002034	E2f3	Distal	chr13	29998449	30002034	0.61	0.42	0.78	0.75	0.81	0.59	0.59	0.53	0.81	0.61	0.57	0.51	0.631667	-0.22	0.16	-0.56	-0.5	-0.62	-0.18	-0.18	-0.06	-0.62	-0.22	-0.14	-0.02	-0.263333	0.00802205	0.372039	20.1224	3.70215	-0.292903	0.263265	0.263265	0.645	0.562	0.852	1.118	1.062	1.554	1.294	1.88	2.029	2.418
E2f3:30002034.2	E2f3:30002034	E2f3	Proximal	chr13	30001639	30002034	0.39	0.58	0.22	0.25	0.19	0.41	0.41	0.47	0.19	0.39	0.43	0.49	0.368333	-0.22	0.16	-0.56	-0.5	-0.62	-0.18	-0.18	-0.06	-0.62	-0.22	-0.14	-0.02	-0.263333	0.00802205	0.372039	20.1224	3.70215	-0.292903	0.263265	0.263265	0.645	0.562	0.852	1.118	1.062	1.554	1.294	1.88	2.029	2.418
Echdc1:29064147.1	Echdc1:29064147	Echdc1	Distal	chr10	29064147	29065757	0.75	0.43	0.44	0.59	0.72	0.69	0.41	0.6	0.77	0.69	0.57	0.55	0.600833	-0.7	-0.27	-0.3	-0.49	-0.64	-0.55	-0.26	-0.52	-0.69	-0.61	-0.45	-0.42	-0.491667	0.0151176	0.476304	20.1224	4.93859	-0.5042	0.162853	0.162853	10.215	8.529	11.765	13.247	11.565	17.829	29.123	24.827	27.286	24.791
Echdc1:29064147.2	Echdc1:29064147	Echdc1	Proximal	chr10	29064147	29065465	0.05	0.16	0.14	0.1	0.08	0.14	0.15	0.08	0.08	0.08	0.12	0.13	0.109167	-0.7	-0.27	-0.3	-0.49	-0.64	-0.55	-0.26	-0.52	-0.69	-0.61	-0.45	-0.42	-0.491667	0.0151176	0.476304	20.1224	4.93859	-0.5042	0.162853	0.162853	10.215	8.529	11.765	13.247	11.565	17.829	29.123	24.827	27.286	24.791
Ednra:80189015.5	Ednra:80189015	Ednra	Distal	chr8	80186927	80189015	0.13	0.14	0.53	0.45	0.52	0.07	0.33	0.31	0.43	0.17	0.26	0.14	0.29	0.06	0.17	-0.44	-0.33	-0.42	0.03	-0.2	-0.19	-0.38	-0.02	-0.01	0.14	-0.1325	0.0414352	0.770282	21.4213	1.36378	-0.153632	0.210084	0.210084	#N/A	#N/A	#N/A	#N/A	#N/A	#N/A	#N/A	#N/A	#N/A	#N/A
Ednra:80189015.6	Ednra:80189015	Ednra	Proximal	chr8	80187393	80189015	0.19	0.31	0.09	0.12	0.1	0.1	0.13	0.12	0.05	0.15	0.25	0.28	0.1575	0.06	0.17	-0.44	-0.33	-0.42	0.03	-0.2	-0.19	-0.38	-0.02	-0.01	0.14	-0.1325	0.0414352	0.770282	21.4213	1.36378	-0.153632	0.210084	0.210084	#N/A	#N/A	#N/A	#N/A	#N/A	#N/A	#N/A	#N/A	#N/A	#N/A
Eif1ad:5369926.2	Eif1ad:5369926	Eif1ad	Distal	chr19	5369926	5371507	0.19	0.09	0.13	0.1	0.1	0.17	0.2	0.08	0.07	0.07	0.11	0.2	0.125833	0.49	0.74	0.63	0.71	0.73	0.51	0.48	0.77	0.79	0.78	0.7	0.46	0.649167	0.00776447	0.371887	23.8388	9.88405	0.650151	0.140068	0.140068	7.272	6.409	6.452	9.111	11.757	7.09	10.965	11.721	12.87	11.972
Eif1ad:5369926.3	Eif1ad:5369926	Eif1ad	Proximal	chr19	5369926	5370248	0.68	0.83	0.76	0.81	0.83	0.68	0.68	0.85	0.86	0.85	0.81	0.66	0.775	0.49	0.74	0.63	0.71	0.73	0.51	0.48	0.77	0.79	0.78	0.7	0.46	0.649167	0.00776447	0.371887	23.8388	9.88405	0.650151	0.140068	0.140068	7.272	6.409	6.452	9.111	11.757	7.09	10.965	11.721	12.87	11.972
Eif4b:101925684.1	Eif4b:101925684	Eif4b	Distal	chr15	101925684	101927604	0.46	0.32	0.5	0.58	0.63	0.63	0.4	0.38	0.49	0.4	0.5	0.48	0.480833	-0.21	0.03	-0.31	-0.39	-0.5	-0.46	-0.3	-0.2	-0.29	-0.2	-0.39	-0.39	-0.300833	0.00285	0.223035	27.8437	3.5655	-0.312798	0.156464	0.156464	16.411	16.558	22.407	22.651	18.544	24.453	31.424	32.876	37.136	28.753
Eif4b:101925684.2	Eif4b:101925684	Eif4b	Proximal	chr15	101925684	101927020	0.25	0.35	0.19	0.19	0.13	0.17	0.1	0.18	0.2	0.2	0.11	0.09	0.18	-0.21	0.03	-0.31	-0.39	-0.5	-0.46	-0.3	-0.2	-0.29	-0.2	-0.39	-0.39	-0.300833	0.00285	0.223035	27.8437	3.5655	-0.312798	0.156464	0.156464	16.411	16.558	22.407	22.651	18.544	24.453	31.424	32.876	37.136	28.753
Eps15:109057924.2	Eps15:109057924	Eps15	Distal	chr4	109057924	109060260	0.52	0.23	0.38	0.53	0.77	0.81	0.38	0.34	0.38	0.43	0.57	0.53	0.489167	-0.17	0.1	-0.1	-0.31	-0.58	-0.71	-0.08	0.03	0.09	-0.09	-0.48	-0.09	-0.199167	0.00804816	0.372039	25.1388	4.98053	-0.20633	0.331488	0.331488	3.715	4.252	5.924	6.845	6.186	7.052	8.662	10.168	9.468	10.331
Eps15:109057924.3	Eps15:109057924	Eps15	Proximal	chr4	109057924	109058300	0.35	0.33	0.28	0.22	0.19	0.1	0.3	0.37	0.47	0.34	0.09	0.44	0.29	-0.17	0.1	-0.1	-0.31	-0.58	-0.71	-0.08	0.03	0.09	-0.09	-0.48	-0.09	-0.199167	0.00804816	0.372039	25.1388	4.98053	-0.20633	0.331488	0.331488	3.715	4.252	5.924	6.845	6.186	7.052	8.662	10.168	9.468	10.331
Etf1:35064724.1	Etf1:35064724	Etf1	Distal	chr18	35062439	35064724	0.25	0.23	0.18	0.24	0.29	0.28	0.24	0.24	0.27	0.28	0.32	0.21	0.2525	-0.06	0.23	0.38	0.43	-0.1	0	0.42	0.41	0.33	0.35	0.14	0.41	0.245	0.00896106	0.374836	20.0539	8.93831	0.261711	0.214266	0.214266	10.931	8.98	13.43	18.361	14.395	17.955	21.641	24.112	25.877	26.022
Etf1:35064724.3	Etf1:35064724	Etf1	Proximal	chr18	35064133	35064724	0.19	0.46	0.56	0.67	0.19	0.28	0.66	0.65	0.6	0.63	0.46	0.62	0.4975	-0.06	0.23	0.38	0.43	-0.1	0	0.42	0.41	0.33	0.35	0.14	0.41	0.245	0.00896106	0.374836	20.0539	8.93831	0.261711	0.214266	0.214266	10.931	8.98	13.43	18.361	14.395	17.955	21.641	24.112	25.877	26.022
Exoc2:30907260.1	Exoc2:30907260	Exoc2	Distal	chr13	30905789	30907260	0.14	0.16	0.6	0.71	0.64	0.4	0.62	0.79	0.6	0.75	0.41	0.51	0.5275	0.13	0.17	-0.48	-0.61	-0.53	-0.23	-0.45	-0.71	-0.51	-0.64	-0.07	-0.37	-0.358333	0.0319147	0.668844	20.3002	0.818011	-0.394971	0.290865	0.290865	0.753	0.642	1.032	1.283	1.109	1.577	1.741	1.878	1.998	2.038
Exoc2:30907260.2	Exoc2:30907260	Exoc2	Proximal	chr13	30905906	30907260	0.27	0.33	0.12	0.1	0.11	0.17	0.17	0.08	0.09	0.11	0.34	0.14	0.169167	0.13	0.17	-0.48	-0.61	-0.53	-0.23	-0.45	-0.71	-0.51	-0.64	-0.07	-0.37	-0.358333	0.0319147	0.668844	20.3002	0.818011	-0.394971	0.290865	0.290865	0.753	0.642	1.032	1.283	1.109	1.577	1.741	1.878	1.998	2.038
Extl3:65673659.2	Extl3:65673659	Extl3	Distal	chr14	65670900	65673659	0.48	0.65	0.39	0.22	0.42	0.34	0.67	0.63	0.55	0.46	0.34	0.67	0.485	-0.23	-0.52	0.09	0.45	-0.02	-0.09	-0.43	-0.49	-0.26	-0.22	-0.14	-0.51	-0.1975	0.0372446	0.714273	23.51	14.5293	-0.194559	0.333353	0.333353	0.867	0.864	1.563	1.387	1.231	1.464	1.614	2.04	2.371	2.051
Extl3:65673659.4	Extl3:65673659	Extl3	Proximal	chr14	65673117	65673659	0.25	0.13	0.48	0.67	0.4	0.25	0.24	0.14	0.29	0.24	0.2	0.16	0.2875	-0.23	-0.52	0.09	0.45	-0.02	-0.09	-0.43	-0.49	-0.26	-0.22	-0.14	-0.51	-0.1975	0.0372446	0.714273	23.51	14.5293	-0.194559	0.333353	0.333353	0.867	0.864	1.563	1.387	1.231	1.464	1.614	2.04	2.371	2.051
Faah:115671220.1	Faah:115671220	Faah	Distal	chr4	115669275	115671220	0.72	0.9	0.9	0.89	0.88	0.81	0.8	0.65	0.85	0.92	0.85	0.85	0.835	-0.53	-0.84	-0.84	-0.82	-0.79	-0.68	-0.66	-0.44	-0.78	-0.87	-0.75	-0.75	-0.729167	0.0109804	0.410799	27.7512	24.3989	-0.710901	0.149193	0.149193	3.933	3.813	5.394	4.247	5.353	7.764	12.252	13.264	13.474	12.942
Faah:115671220.3	Faah:115671220	Faah	Proximal	chr4	115670797	115671220	0.19	0.06	0.06	0.07	0.09	0.13	0.14	0.21	0.07	0.05	0.1	0.1	0.105833	-0.53	-0.84	-0.84	-0.82	-0.79	-0.68	-0.66	-0.44	-0.78	-0.87	-0.75	-0.75	-0.729167	0.0109804	0.410799	27.7512	24.3989	-0.710901	0.149193	0.149193	3.933	3.813	5.394	4.247	5.353	7.764	12.252	13.264	13.474	12.942
Fadd:151766765.2	Fadd:151766765	Fadd	Distal	chr7	151764227	151766765	0.1	0.07	0.36	0.11	0.35	0.17	0.18	0.28	0.38	0.39	0	0.22	0.2175	0.26	0.1	-0.23	0.06	-0.25	0.3	0.34	0.13	-0.05	-0.18	0	0.05	0.0441667	0.00605146	0.344565	26.499	23.8305	0.0651106	0.226509	0.226509	3.803	6.972	6.236	3.989	4.038	7.424	8.318	8.269	10.408	6.246
Fadd:151766765.3	Fadd:151766765	Fadd	Proximal	chr7	151765433	151766765	0.36	0.17	0.13	0.17	0.1	0.47	0.52	0.41	0.33	0.21	0	0.27	0.261667	0.26	0.1	-0.23	0.06	-0.25	0.3	0.34	0.13	-0.05	-0.18	0	0.05	0.0441667	0.00605146	0.344565	26.499	23.8305	0.0651106	0.226509	0.226509	3.803	6.972	6.236	3.989	4.038	7.424	8.318	8.269	10.408	6.246
Faf2:54762315.4	Faf2:54762315	Faf2	Distal	chr13	54762315	54762963	0.5	0.34	0.34	0.66	0.52	0.25	0.23	0.3	0.5	0.39	0.18	0.22	0.369167	-0.17	0.08	-0.11	-0.52	-0.31	0.22	0.32	0.02	-0.38	-0.11	0.35	0.29	-0.0266667	0.00335133	0.246374	20.9371	2.89966	-0.0582652	0.31619	0.31619	2.979	3.289	3.829	2.936	2.989	4.84	5.832	6.729	5.86	4.73
Faf2:54762315.5	Faf2:54762315	Faf2	Proximal	chr13	54762315	54762589	0.33	0.42	0.23	0.14	0.21	0.47	0.55	0.32	0.12	0.28	0.53	0.51	0.3425	-0.17	0.08	-0.11	-0.52	-0.31	0.22	0.32	0.02	-0.38	-0.11	0.35	0.29	-0.0266667	0.00335133	0.246374	20.9371	2.89966	-0.0582652	0.31619	0.31619	2.979	3.289	3.829	2.936	2.989	4.84	5.832	6.729	5.86	4.73
Fam149a:46424726.1	Fam149a:46424726	Fam149a	Distal	chr8	46422069	46424726	0.24	0.2	0.36	0.48	0.33	0.38	0.19	0.25	0.14	0.24	0.38	0.2	0.2825	0.09	0.49	-0.1	-0.13	-0.16	-0.01	0.45	0.32	0.62	0.11	-0.13	0.19	0.145	0.0249263	0.578672	25.3665	2.71143	0.146256	0.330645	0.330645	0.722	1.203	0.877	1.354	1.172	2.227	3.546	4.288	2.7	2.285
Fam149a:46424726.4	Fam149a:46424726	Fam149a	Proximal	chr8	46424429	46424726	0.33	0.69	0.26	0.35	0.17	0.37	0.64	0.57	0.76	0.35	0.25	0.39	0.4275	0.09	0.49	-0.1	-0.13	-0.16	-0.01	0.45	0.32	0.62	0.11	-0.13	0.19	0.145	0.0249263	0.578672	25.3665	2.71143	0.146256	0.330645	0.330645	0.722	1.203	0.877	1.354	1.172	2.227	3.546	4.288	2.7	2.285
Fam53c:34930252.1	Fam53c:34930252	Fam53c	Distal	chr18	34930252	34933414	0.32	0.31	0.6	0.62	0.25	0.27	0.65	0.74	0.67	0.43	0.32	0.69	0.489167	0.14	0.18	-0.36	-0.37	0.38	0.34	-0.44	-0.61	-0.48	-0.03	0.16	-0.53	-0.135	0.0232299	0.560753	20.5261	18.7673	-0.164022	0.417056	0.417056	1.275	1.641	1.929	2.473	3.378	3.817	2.886	4.18	2.954	3.553
Fam53c:34930252.2	Fam53c:34930252	Fam53c	Proximal	chr18	34930252	34933328	0.46	0.49	0.24	0.25	0.63	0.61	0.21	0.13	0.19	0.4	0.48	0.16	0.354167	0.14	0.18	-0.36	-0.37	0.38	0.34	-0.44	-0.61	-0.48	-0.03	0.16	-0.53	-0.135	0.0232299	0.560753	20.5261	18.7673	-0.164022	0.417056	0.417056	1.275	1.641	1.929	2.473	3.378	3.817	2.886	4.18	2.954	3.553
Fam54b:134082427.1	Fam54b:134082427	Fam54b	Distal	chr4	134081477	134082427	0.4	0.38	0.58	0.51	0.55	0.41	0.53	0.89	0.7	0.51	0.35	0.45	0.521667	0.2	0.24	-0.16	-0.02	-0.1	0.18	-0.06	-0.78	-0.4	-0.02	0.3	0.1	-0.0433333	0.00858686	0.374836	20.0201	0.0582413	-0.0787796	0.319715	0.319715	7.924	9.041	8.265	10.099	9.998	13.268	21.052	20.343	22.311	21.732
Fam54b:134082427.2	Fam54b:134082427	Fam54b	Proximal	chr4	134082020	134082427	0.6	0.62	0.42	0.49	0.45	0.59	0.47	0.11	0.3	0.49	0.65	0.55	0.478333	0.2	0.24	-0.16	-0.02	-0.1	0.18	-0.06	-0.78	-0.4	-0.02	0.3	0.1	-0.0433333	0.00858686	0.374836	20.0201	0.0582413	-0.0787796	0.319715	0.319715	7.924	9.041	8.265	10.099	9.998	13.268	21.052	20.343	22.311	21.732
Fam73b:30239449.4	Fam73b:30239449	Fam73b	Distal	chr2	30239449	30241647	0.06	0.07	0.23	0.07	0.29	0.06	0.05	0.11	0.13	0.15	0.23	0.07	0.126667	0.59	0.7	0.24	0.41	0.13	0.53	0.68	0.56	0.41	0.4	0.23	0.73	0.4675	0.0156704	0.484285	23.15	2.46641	0.462819	0.228314	0.228314	2.759	3.638	4.403	5.338	4.686	6.439	6.218	5.938	6.82	7.834
Fam73b:30239449.5	Fam73b:30239449	Fam73b	Proximal	chr2	30239449	30241039	0.65	0.77	0.47	0.48	0.42	0.59	0.73	0.67	0.54	0.55	0.46	0.8	0.594167	0.59	0.7	0.24	0.41	0.13	0.53	0.68	0.56	0.41	0.4	0.23	0.73	0.4675	0.0156704	0.484285	23.15	2.46641	0.462819	0.228314	0.228314	2.759	3.638	4.403	5.338	4.686	6.439	6.218	5.938	6.82	7.834
Fbxo22:55071047.1	Fbxo22:55071047	Fbxo22	Distal	chr9	55071047	55072688	0.04	0.02	0.72	0.6	0.02	0.02	0.04	0.07	0.67	0.05	0.18	0.06	0.2075	0.86	0.79	-0.6	-0.34	0.93	0.85	0.9	0.83	-0.51	0.8	0.61	0.82	0.495	0.0212822	0.533112	24.0206	21.5137	0.495531	0.593829	0.593829	9.348	8.465	13.369	17.791	15.444	14.021	17.126	15.048	23.133	23.88
Fbxo22:55071047.2	Fbxo22:55071047	Fbxo22	Proximal	chr9	55071047	55072240	0.9	0.81	0.12	0.26	0.95	0.87	0.94	0.9	0.16	0.85	0.79	0.88	0.7025	0.86	0.79	-0.6	-0.34	0.93	0.85	0.9	0.83	-0.51	0.8	0.61	0.82	0.495	0.0212822	0.533112	24.0206	21.5137	0.495531	0.593829	0.593829	9.348	8.465	13.369	17.791	15.444	14.021	17.126	15.048	23.133	23.88
Fermt2:46079698.2	Fermt2:46079698	Fermt2	Distal	chr14	46078498	46079698	0.11	0.15	0.09	0.17	0.16	0.31	0.32	0.36	0.32	0.22	0.28	0.42	0.2425	0.15	0.15	0.22	0.07	0.04	-0.13	-0.16	-0.05	-0.1	0.15	-0.02	-0.31	0.000833333	0.047916	0.826236	26.6993	6.54044	-0.0108194	0.121544	0.121544	9.014	8.267	8.941	7.036	10.657	13.442	21.031	18.277	12.568	10.921
Fermt2:46079698.6	Fermt2:46079698	Fermt2	Proximal	chr14	46079427	46079698	0.26	0.3	0.31	0.24	0.2	0.18	0.16	0.31	0.22	0.37	0.26	0.11	0.243333	0.15	0.15	0.22	0.07	0.04	-0.13	-0.16	-0.05	-0.1	0.15	-0.02	-0.31	0.000833333	0.047916	0.826236	26.6993	6.54044	-0.0108194	0.121544	0.121544	9.014	8.267	8.941	7.036	10.657	13.442	21.031	18.277	12.568	10.921
Fgg:82818230.1	Fgg:82818230	Fgg	Distal	chr3	82818230	82818728	0.16	0.15	0.1	0.16	0.2	0.23	0.25	0.25	0.14	0.2	0.24	0.36	0.203333	0.68	0.7	0.8	0.68	0.6	0.54	0.5	0.5	0.72	0.6	0.52	0.28	0.593333	0.00711281	0.368262	26.0536	7.47734	0.583739	0.120101	0.120101	2051.97	1851.27	1716.64	1329.75	1403.23	2003.98	3020.19	3079.9	2294.2	1865.14
Fgg:82818230.2	Fgg:82818230	Fgg	Proximal	chr3	82818230	82818640	0.84	0.85	0.9	0.84	0.8	0.77	0.75	0.75	0.86	0.8	0.76	0.64	0.796667	0.68	0.7	0.8	0.68	0.6	0.54	0.5	0.5	0.72	0.6	0.52	0.28	0.593333	0.00711281	0.368262	26.0536	7.47734	0.583739	0.120101	0.120101	2051.97	1851.27	1716.64	1329.75	1403.23	2003.98	3020.19	3079.9	2294.2	1865.14
Fmo5:97455405.1	Fmo5:97455405	Fmo5	Distal	chr3	97455405	97459208	0.28	0.32	0.39	0.57	0.5	0.41	0.39	0.43	0.46	0.58	0.56	0.45	0.445	0.1	0.08	0.09	-0.18	-0.05	-0.02	0.21	0.11	0.06	-0.18	-0.13	0.08	0.0141667	0.000125399	0.0652538	23.1602	2.55867	0.0110934	0.158232	0.158232	58.542	49.992	69.434	156.692	147.96	161.168	135.916	116.467	165.105	235.72
Fmo5:97455405.3	Fmo5:97455405	Fmo5	Proximal	chr3	97455405	97456529	0.38	0.4	0.48	0.39	0.45	0.39	0.6	0.54	0.52	0.4	0.43	0.53	0.459167	0.1	0.08	0.09	-0.18	-0.05	-0.02	0.21	0.11	0.06	-0.18	-0.13	0.08	0.0141667	0.000125399	0.0652538	23.1602	2.55867	0.0110934	0.158232	0.158232	58.542	49.992	69.434	156.692	147.96	161.168	135.916	116.467	165.105	235.72
Fosl2:32455044.1	Fosl2:32455044	Fosl2	Distal	chr5	32455044	32460213	0.4	0.25	0.21	0.36	0.35	0.48	0.4	0.52	0.31	0.36	0.58	0.74	0.413333	-0.03	0.14	0.17	0.09	0.05	-0.19	-0.07	-0.17	0.05	-0.01	-0.38	-0.67	-0.085	0.0207004	0.525277	23.6541	9.55154	-0.0822436	0.185147	0.185147	1.329	1.006	0.826	1.369	1.419	1.967	1.693	2.173	1.427	1.527
Fosl2:32455044.2	Fosl2:32455044	Fosl2	Proximal	chr5	32455044	32460118	0.37	0.39	0.38	0.45	0.4	0.29	0.33	0.35	0.36	0.35	0.2	0.07	0.328333	-0.03	0.14	0.17	0.09	0.05	-0.19	-0.07	-0.17	0.05	-0.01	-0.38	-0.67	-0.085	0.0207004	0.525277	23.6541	9.55154	-0.0822436	0.185147	0.185147	1.329	1.006	0.826	1.369	1.419	1.967	1.693	2.173	1.427	1.527
Ftsjd1:112744940.1	Ftsjd1:112744940	Ftsjd1	Distal	chr8	112744940	112748388	0.2	0.18	0.57	0.3	0.31	0.23	0.3	0.32	0.54	0.45	0	0.29	0.3075	0.26	0.17	-0.27	0.33	0.3	0.35	0.33	0.19	-0.25	-0.04	0	0.33	0.141667	0.000477417	0.0857936	27.3189	20.7777	0.175134	0.268427	0.268427	3.656	1.757	2.194	2.786	2.378	3.766	4.095	2.894	2.541	5.105
Ftsjd1:112744940.2	Ftsjd1:112744940	Ftsjd1	Proximal	chr8	112744940	112748195	0.46	0.35	0.3	0.63	0.61	0.58	0.63	0.51	0.29	0.41	0	0.62	0.449167	0.26	0.17	-0.27	0.33	0.3	0.35	0.33	0.19	-0.25	-0.04	0	0.33	0.141667	0.000477417	0.0857936	27.3189	20.7777	0.175134	0.268427	0.268427	3.656	1.757	2.194	2.786	2.378	3.766	4.095	2.894	2.541	5.105
Fxn:24336543.6	Fxn:24336543	Fxn	Distal	chr19	24336246	24336543	0.6	0.66	0.7	0.6	0.33	0.48	0.69	0.8	0.62	0.51	0.26	0.5	0.5625	-0.39	-0.49	-0.57	-0.39	-0.03	-0.27	-0.56	-0.73	-0.38	-0.41	-0.15	-0.24	-0.384167	0.00126728	0.125668	23.1179	17.0381	-0.386234	0.24521	0.24521	1.14	0.656	1.097	1.044	1.019	1.72	1.665	1.919	1.175	1.343
Fxn:24336543.7	Fxn:24336543	Fxn	Proximal	chr19	24336344	24336543	0.21	0.17	0.13	0.21	0.3	0.21	0.13	0.07	0.24	0.1	0.11	0.26	0.178333	-0.39	-0.49	-0.57	-0.39	-0.03	-0.27	-0.56	-0.73	-0.38	-0.41	-0.15	-0.24	-0.384167	0.00126728	0.125668	23.1179	17.0381	-0.386234	0.24521	0.24521	1.14	0.656	1.097	1.044	1.019	1.72	1.665	1.919	1.175	1.343
Gdi1:71556126.1	Gdi1:71556126	Gdi1	Distal	chrX	71556126	71557206	0.43	0.4	0.35	0.26	0.22	0.32	0.26	0.41	0.41	0.35	0.37	0.2	0.331667	-0.01	-0.04	0.15	0.42	0.49	0.27	0.23	-0.07	-0.25	0.2	0.16	0.51	0.171667	0.000256005	0.0653756	26.6667	17.1453	0.18473	0.292404	0.292404	14.83	14.797	17.591	17.691	16.379	22.155	23.634	24.571	25.681	24.512
Gdi1:71556126.2	Gdi1:71556126	Gdi1	Proximal	chrX	71556126	71556250	0.42	0.36	0.5	0.68	0.71	0.59	0.49	0.34	0.16	0.55	0.53	0.71	0.503333	-0.01	-0.04	0.15	0.42	0.49	0.27	0.23	-0.07	-0.25	0.2	0.16	0.51	0.171667	0.000256005	0.0653756	26.6667	17.1453	0.18473	0.292404	0.292404	14.83	14.797	17.591	17.691	16.379	22.155	23.634	24.571	25.681	24.512
Ggnbp2:84646715.2	Ggnbp2:84646715	Ggnbp2	Distal	chr11	84646084	84646715	0.22	0.5	0.75	0.35	0.23	0.43	0.66	0.71	0.45	0.46	0.42	0.53	0.475833	-0.12	-0.27	-0.66	0.02	0.38	-0.19	-0.44	-0.48	0.02	-0.06	0.04	-0.16	-0.16	0.0101535	0.400567	22.041	16.0988	-0.157032	0.326108	0.326108	4.933	4.941	7.717	7.863	8.382	11.81	15.308	16.754	16.955	17.442
Ggnbp2:84646715.3	Ggnbp2:84646715	Ggnbp2	Proximal	chr11	84646481	84646715	0.1	0.23	0.09	0.37	0.61	0.24	0.22	0.23	0.47	0.4	0.46	0.37	0.315833	-0.12	-0.27	-0.66	0.02	0.38	-0.19	-0.44	-0.48	0.02	-0.06	0.04	-0.16	-0.16	0.0101535	0.400567	22.041	16.0988	-0.157032	0.326108	0.326108	4.933	4.941	7.717	7.863	8.382	11.81	15.308	16.754	16.955	17.442
Gm5631:8191094.1	Gm5631:8191094	Gm5631	Distal	chr19	8189373	8191094	0.12	0.68	0.65	0.56	0.59	0.31	0.52	0.6	0.31	0.13	0.28	0.68	0.4525	0.76	-0.36	-0.3	-0.12	-0.18	0.38	-0.04	-0.2	0.38	0.74	0.44	-0.36	0.095	0.0243642	0.568536	20.5652	16.6216	0.0985604	0.390632	0.390632	1.262	0.976	1.284	1.743	2.163	2.529	3.72	4.519	4.624	3.294
Gm5631:8191094.2	Gm5631:8191094	Gm5631	Proximal	chr19	8191007	8191094	0.88	0.32	0.35	0.44	0.41	0.69	0.48	0.4	0.69	0.87	0.72	0.32	0.5475	0.76	-0.36	-0.3	-0.12	-0.18	0.38	-0.04	-0.2	0.38	0.74	0.44	-0.36	0.095	0.0243642	0.568536	20.5652	16.6216	0.0985604	0.390632	0.390632	1.262	0.976	1.284	1.743	2.163	2.529	3.72	4.519	4.624	3.294
Gm608:44215528.2	Gm608:44215528	Gm608	Distal	chr16	44215528	44227578	0.62	0.45	0.8	0.84	0.78	0.68	0.65	0.64	0.78	0.73	0.61	0.58	0.68	-0.45	-0.13	-0.69	-0.78	-0.66	-0.51	-0.4	-0.36	-0.65	-0.58	-0.34	-0.3	-0.4875	0.00267784	0.212998	20.2393	3.6764	-0.510726	0.212828	0.212828	2.261	3.991	5.582	6.425	6.724	8.155	7.44	9.845	10.57	9.927
Gm608:44215528.4	Gm608:44215528	Gm608	Proximal	chr16	44215528	44215669	0.17	0.32	0.11	0.06	0.12	0.17	0.25	0.28	0.13	0.15	0.27	0.28	0.1925	-0.45	-0.13	-0.69	-0.78	-0.66	-0.51	-0.4	-0.36	-0.65	-0.58	-0.34	-0.3	-0.4875	0.00267784	0.212998	20.2393	3.6764	-0.510726	0.212828	0.212828	2.261	3.991	5.582	6.425	6.724	8.155	7.44	9.845	10.57	9.927
Gnaq:16457694.1	Gnaq:16457694	Gnaq	Distal	chr19	16457694	16463010	0.35	0.52	0.34	0.22	0.02	0.34	0.51	0.67	0.47	0.29	0.42	0.33	0.373333	-0.18	-0.41	-0.1	0.19	0.43	0.09	-0.32	-0.57	-0.32	0	-0.14	0.03	-0.108333	0.000540447	0.0876154	25.7868	15.8607	-0.106264	0.368488	0.368488	0.816	0.904	1.485	2.132	2.161	2.685	2.29	2.445	3.226	3.139
Gnaq:16457694.2	Gnaq:16457694	Gnaq	Proximal	chr19	16457694	16461953	0.17	0.11	0.24	0.41	0.45	0.43	0.19	0.1	0.15	0.29	0.28	0.36	0.265	-0.18	-0.41	-0.1	0.19	0.43	0.09	-0.32	-0.57	-0.32	0	-0.14	0.03	-0.108333	0.000540447	0.0876154	25.7868	15.8607	-0.106264	0.368488	0.368488	0.816	0.904	1.485	2.132	2.161	2.685	2.29	2.445	3.226	3.139
Gpr89:96675517.5	Gpr89:96675517	Gpr89	Distal	chr3	96674831	96675517	0.15	0.09	0.1	0.56	0.24	0.14	0.17	0.21	0.34	0.45	0.13	0.1	0.223333	0.49	0.4	0.3	-0.47	-0.06	0.05	0.24	0.14	-0.08	-0.32	-0.02	0.49	0.0966667	0.000217498	0.0652538	22.3546	1.80682	0.0763933	0.35396	0.35396	1.936	1.906	1.606	1.5	1.751	2.351	3.343	3.438	2.907	2.819
Gpr89:96675517.6	Gpr89:96675517	Gpr89	Proximal	chr3	96674986	96675517	0.64	0.49	0.4	0.09	0.18	0.19	0.41	0.35	0.26	0.13	0.11	0.59	0.32	0.49	0.4	0.3	-0.47	-0.06	0.05	0.24	0.14	-0.08	-0.32	-0.02	0.49	0.0966667	0.000217498	0.0652538	22.3546	1.80682	0.0763933	0.35396	0.35396	1.936	1.906	1.606	1.5	1.751	2.351	3.343	3.438	2.907	2.819
Grtp1:13177142.1	Grtp1:13177142	Grtp1	Distal	chr8	13172761	13177142	0.98	0.05	0.06	0.63	0.98	0.98	0.01	0.02	0.04	0.98	0.97	0.98	0.556667	-0.97	0.43	0.58	-0.41	-0.97	-0.97	0.64	0.48	0.55	-0.96	-0.95	-0.97	-0.293333	0.000576151	0.0876154	22.4514	7.03529	-0.262484	0.934775	0.934775	1.473	2.444	1.893	1.757	1.55	2.387	2.93	2.932	3.221	2.105
Grtp1:13177142.3	Grtp1:13177142	Grtp1	Proximal	chr8	13176925	13177142	0.01	0.48	0.64	0.22	0.01	0.01	0.65	0.5	0.59	0.02	0.02	0.01	0.263333	-0.97	0.43	0.58	-0.41	-0.97	-0.97	0.64	0.48	0.55	-0.96	-0.95	-0.97	-0.293333	0.000576151	0.0876154	22.4514	7.03529	-0.262484	0.934775	0.934775	1.473	2.444	1.893	1.757	1.55	2.387	2.93	2.932	3.221	2.105
Gypc:32689855.1	Gypc:32689855	Gypc	Distal	chr18	32685779	32689855	0.05	0.05	0.22	0.26	0.31	0.03	0.07	0.05	0.09	0.11	0.02	0.06	0.11	0.9	0.9	0.56	0.48	0.38	0.94	0.86	0.9	0.82	0.78	0.96	0.88	0.78	0.0439104	0.792958	20.9751	2.73394	0.762153	0.175998	0.175998	#N/A	#N/A	#N/A	#N/A	#N/A	#N/A	#N/A	#N/A	#N/A	#N/A
Gypc:32689855.2	Gypc:32689855	Gypc	Proximal	chr18	32687974	32689855	0.95	0.95	0.78	0.74	0.69	0.97	0.93	0.95	0.91	0.89	0.98	0.94	0.89	0.9	0.9	0.56	0.48	0.38	0.94	0.86	0.9	0.82	0.78	0.96	0.88	0.78	0.0439104	0.792958	20.9751	2.73394	0.762153	0.175998	0.175998	#N/A	#N/A	#N/A	#N/A	#N/A	#N/A	#N/A	#N/A	#N/A	#N/A
Hal:92978927.1	Hal:92978927	Hal	Distal	chr10	92978927	92982047	0.18	0.2	0.23	0.29	0.26	0.28	0.16	0.18	0.22	0.23	0.23	0.18	0.22	0.24	0.33	0.05	0.18	-0.01	0.2	0.52	0.42	0.05	0.08	-0.13	0.28	0.184167	0.0205543	0.525277	23.8388	1.64288	0.183264	0.21121	0.21121	30.024	34.161	31.642	20.999	24.929	47.1	63.409	63.469	57.02	37.256
Hal:92978927.6	Hal:92978927	Hal	Proximal	chr10	92978927	92979337	0.42	0.53	0.28	0.47	0.25	0.48	0.68	0.6	0.27	0.31	0.1	0.46	0.404167	0.24	0.33	0.05	0.18	-0.01	0.2	0.52	0.42	0.05	0.08	-0.13	0.28	0.184167	0.0205543	0.525277	23.8388	1.64288	0.183264	0.21121	0.21121	30.024	34.161	31.642	20.999	24.929	47.1	63.409	63.469	57.02	37.256
Hdhd3:62161127.2	Hdhd3:62161127	Hdhd3	Distal	chr4	62160041	62161127	0.26	0.25	0.19	0.34	0.35	0.17	0.35	0.34	0.39	0.38	0.26	0.17	0.2875	-0.03	0.08	-0.1	-0.14	-0.23	0.05	-0.17	-0.11	-0.21	-0.31	-0.08	0.04	-0.100833	0.0480211	0.826236	20.4729	2.2611	-0.115245	0.115718	0.115718	13.475	8.317	4.13	10.091	8.147	12.73	16.749	10.983	12.246	7.725
Hdhd3:62161127.4	Hdhd3:62161127	Hdhd3	Proximal	chr4	62160140	62161127	0.23	0.33	0.09	0.2	0.12	0.22	0.18	0.23	0.18	0.07	0.18	0.21	0.186667	-0.03	0.08	-0.1	-0.14	-0.23	0.05	-0.17	-0.11	-0.21	-0.31	-0.08	0.04	-0.100833	0.0480211	0.826236	20.4729	2.2611	-0.115245	0.115718	0.115718	13.475	8.317	4.13	10.091	8.147	12.73	16.749	10.983	12.246	7.725
Hfe2:96331987.1	Hfe2:96331987	Hfe2	Distal	chr3	96331987	96333291	0.12	0.03	0.08	0.5	0.22	0.03	0.06	0.19	0.19	0.19	0.38	0.05	0.17	0.72	0.86	0.68	-0.18	0.5	0.87	0.87	0.59	0.59	0.56	0.21	0.86	0.594167	0.0352247	0.693419	24.6874	0.314699	0.601065	0.320997	0.320997	31.959	31.743	22.147	18.759	26.51	39.84	61.554	51.294	35.31	33.417
Hfe2:96331987.2	Hfe2:96331987	Hfe2	Proximal	chr3	96331987	96333134	0.84	0.89	0.76	0.32	0.72	0.9	0.93	0.78	0.78	0.75	0.59	0.91	0.764167	0.72	0.86	0.68	-0.18	0.5	0.87	0.87	0.59	0.59	0.56	0.21	0.86	0.594167	0.0352247	0.693419	24.6874	0.314699	0.601065	0.320997	0.320997	31.959	31.743	22.147	18.759	26.51	39.84	61.554	51.294	35.31	33.417
Hibch:52977107.1	Hibch:52977107	Hibch	Distal	chr1	52977107	52978080	0.11	0.15	0.17	0.39	0.32	0.26	0.15	0.24	0.15	0.24	0.47	0.22	0.239167	0.78	0.7	0.66	0.22	0.36	0.48	0.7	0.52	0.7	0.52	0.06	0.56	0.521667	0.01563	0.484285	25.673	1.97108	0.524571	0.218558	0.218558	1.951	2.284	2.93	3.677	3.133	4.234	5.897	6.433	6.285	6.884
Hibch:52977107.2	Hibch:52977107	Hibch	Proximal	chr1	52977107	52977704	0.89	0.85	0.83	0.61	0.68	0.74	0.85	0.76	0.85	0.76	0.53	0.78	0.760833	0.78	0.7	0.66	0.22	0.36	0.48	0.7	0.52	0.7	0.52	0.06	0.56	0.521667	0.01563	0.484285	25.673	1.97108	0.524571	0.218558	0.218558	1.951	2.284	2.93	3.677	3.133	4.234	5.897	6.433	6.285	6.884
Hist1h1e:23714427.2	Hist1h1e:23714427	Hist1h1e	Distal	chr13	23713094	23714427	0.06	0.04	0.05	0.17	0.4	0.14	0.08	0.07	0.12	0.14	0.11	0.14	0.126667	0.84	0.89	0.8	0.5	0.08	0.62	0.77	0.84	0.72	0.65	0.59	0.7	0.666667	0.00022863	0.0652538	23.6165	4.23133	0.6666	0.264983	0.264983	63.767	69.298	53.315	48.868	48.536	69.558	65.453	80.875	44.534	36.451
Hist1h1e:23714427.3	Hist1h1e:23714427	Hist1h1e	Proximal	chr13	23713250	23714427	0.9	0.93	0.85	0.67	0.48	0.76	0.85	0.91	0.84	0.79	0.7	0.84	0.793333	0.84	0.89	0.8	0.5	0.08	0.62	0.77	0.84	0.72	0.65	0.59	0.7	0.666667	0.00022863	0.0652538	23.6165	4.23133	0.6666	0.264983	0.264983	63.767	69.298	53.315	48.868	48.536	69.558	65.453	80.875	44.534	36.451
Hnrnpc:52694835.2	Hnrnpc:52694835	Hnrnpc	Distal	chr14	52693223	52694835	0.22	0.3	0.2	0.51	0.4	0.2	0.29	0.49	0.46	0.54	0.51	0.17	0.3575	0.03	-0.21	-0.07	-0.23	0.03	0.22	0.28	-0.22	-0.11	-0.24	-0.18	0.29	-0.0341667	0.00896146	0.374836	25.4237	21.3081	-0.0202749	0.232864	0.232864	6.446	6.046	8.402	8.95	9.329	12.848	13.51	13.563	14.578	14.681
Hnrnpc:52694835.4	Hnrnpc:52694835	Hnrnpc	Proximal	chr14	52693827	52694835	0.25	0.09	0.13	0.28	0.43	0.42	0.57	0.27	0.35	0.3	0.33	0.46	0.323333	0.03	-0.21	-0.07	-0.23	0.03	0.22	0.28	-0.22	-0.11	-0.24	-0.18	0.29	-0.0341667	0.00896146	0.374836	25.4237	21.3081	-0.0202749	0.232864	0.232864	6.446	6.046	8.402	8.95	9.329	12.848	13.51	13.563	14.578	14.681
Hs2st1:144097678.2	Hs2st1:144097678	Hs2st1	Distal	chr3	144094067	144097678	0.09	0.09	0.15	0.07	0.15	0.25	0.35	0.38	0.2	0.11	0.14	0.31	0.190833	0.02	0.06	0.2	0.1	0.02	-0.04	-0.22	-0.26	-0.14	0.02	0.19	-0.23	-0.0233333	0.0494683	0.836307	27.7808	9.81756	-0.0460892	0.170738	0.170738	0.462	0.526	0.75	1.082	1.012	1.3	1.283	1.234	1.592	1.632
Hs2st1:144097678.3	Hs2st1:144097678	Hs2st1	Proximal	chr3	144094630	144097678	0.11	0.15	0.35	0.17	0.17	0.21	0.13	0.12	0.06	0.13	0.33	0.08	0.1675	0.02	0.06	0.2	0.1	0.02	-0.04	-0.22	-0.26	-0.14	0.02	0.19	-0.23	-0.0233333	0.0494683	0.836307	27.7808	9.81756	-0.0460892	0.170738	0.170738	0.462	0.526	0.75	1.082	1.012	1.3	1.283	1.234	1.592	1.632
Hsd17b4:50289838.1	Hsd17b4:50289838	Hsd17b4	Distal	chr18	50289838	50295254	0.5	0.69	0.7	0.4	0.35	0.41	0.44	0.54	0.66	0.43	0.46	0	0.465	0	-0.38	-0.4	0.2	0.3	0.18	0.12	-0.08	-0.32	0.14	0.08	1	0.07	0.00188508	0.166298	26.6318	18.3081	0.0954196	0.370042	0.370042	9.56	10.41	14.627	15.746	17.741	22.044	24.459	26.141	28.41	28.746
Hsd17b4:50289838.2	Hsd17b4:50289838	Hsd17b4	Proximal	chr18	50289838	50295053	0.5	0.31	0.3	0.6	0.65	0.59	0.56	0.46	0.34	0.57	0.54	1	0.535	0	-0.38	-0.4	0.2	0.3	0.18	0.12	-0.08	-0.32	0.14	0.08	1	0.07	0.00188508	0.166298	26.6318	18.3081	0.0954196	0.370042	0.370042	9.56	10.41	14.627	15.746	17.741	22.044	24.459	26.141	28.41	28.746
Ibtk:85582121.1	Ibtk:85582121	Ibtk	Distal	chr9	85580963	85582121	0.23	0.38	0.32	0.24	0.12	0.37	0.63	0.5	0.34	0.4	0.42	0.46	0.3675	0.46	0.18	0.17	0.48	0.72	0.23	-0.28	-0.03	0.28	0.17	0.07	0.04	0.2075	0.0267038	0.602637	20.3368	15.5054	0.222084	0.265376	0.265376	2.437	3.291	4.15	5.548	4.975	6.002	7.868	8.859	8.954	9.501
Ibtk:85582121.2	Ibtk:85582121	Ibtk	Proximal	chr9	85581149	85582121	0.69	0.56	0.49	0.72	0.84	0.6	0.35	0.47	0.62	0.57	0.49	0.5	0.575	0.46	0.18	0.17	0.48	0.72	0.23	-0.28	-0.03	0.28	0.17	0.07	0.04	0.2075	0.0267038	0.602637	20.3368	15.5054	0.222084	0.265376	0.265376	2.437	3.291	4.15	5.548	4.975	6.002	7.868	8.859	8.954	9.501
Ids:67599848.4	Ids:67599848	Ids	Distal	chrX	67598279	67599848	0.28	0.31	0.32	0.6	0.48	0.39	0.2	0.18	0.41	0.4	0.63	0.22	0.368333	-0.05	0.08	0.03	-0.47	-0.28	-0.17	0.09	-0.02	-0.21	-0.11	-0.5	0.12	-0.124167	0.0143513	0.465438	21.0185	4.83243	-0.13468	0.224071	0.224071	2.617	1.937	2.224	3.419	3.575	4.143	6.627	5.444	6.222	6.497
Ids:67599848.5	Ids:67599848	Ids	Proximal	chrX	67598329	67599848	0.23	0.39	0.35	0.13	0.2	0.22	0.29	0.16	0.2	0.29	0.13	0.34	0.244167	-0.05	0.08	0.03	-0.47	-0.28	-0.17	0.09	-0.02	-0.21	-0.11	-0.5	0.12	-0.124167	0.0143513	0.465438	21.0185	4.83243	-0.13468	0.224071	0.224071	2.617	1.937	2.224	3.419	3.575	4.143	6.627	5.444	6.222	6.497
Igf1:87393420.1.1	Igf1:87393420.1	Igf1	Distal	chr10	87393420	87399792	0.09	0.12	0.11	0.15	0.14	0.15	0.16	0.19	0.28	0.26	0.25	0.19	0.174167	0.58	0.43	0.34	0.2	0.34	0.3	0.5	0.46	0.25	0.28	0.33	0.42	0.369167	0.000853193	0.104796	23.5978	1.08663	0.367471	0.127988	0.127988	17.066	21.626	28.944	45.128	38.39	38.975	56.976	64.739	79.105	85.066
Igf1:87393420.7.1	Igf1:87393420.1	Igf1	Proximal	chr10	87393420	87393649	0.67	0.55	0.45	0.35	0.48	0.45	0.66	0.65	0.53	0.54	0.58	0.61	0.543333	0.58	0.43	0.34	0.2	0.34	0.3	0.5	0.46	0.25	0.28	0.33	0.42	0.369167	0.000853193	0.104796	23.5978	1.08663	0.367471	0.127988	0.127988	17.066	21.626	28.944	45.128	38.39	38.975	56.976	64.739	79.105	85.066
Il17rb:30810375.7	Il17rb:30810375	Il17rb	Distal	chr14	30809312	30810375	0.16	0.11	0.28	0.2	0.12	0.14	0.09	0.24	0.34	0.09	0.1	0.09	0.163333	-0.01	0.02	-0.15	-0.03	0.3	0.04	0.04	-0.06	-0.22	-0.02	0.02	0.05	-0.00166667	0.0161526	0.484877	24.7616	19.9362	0.00186177	0.123723	0.123723	1.649	2.168	3.664	3.027	3.772	2.679	2.41	3.181	3.069	2.782
Il17rb:30810375.8	Il17rb:30810375	Il17rb	Proximal	chr14	30809385	30810375	0.15	0.13	0.13	0.17	0.42	0.18	0.13	0.18	0.12	0.07	0.12	0.14	0.161667	-0.01	0.02	-0.15	-0.03	0.3	0.04	0.04	-0.06	-0.22	-0.02	0.02	0.05	-0.00166667	0.0161526	0.484877	24.7616	19.9362	0.00186177	0.123723	0.123723	1.649	2.168	3.664	3.027	3.772	2.679	2.41	3.181	3.069	2.782
Irf6:194995476.1	Irf6:194995476	Irf6	Distal	chr1	194995476	194998230	0.2	0.46	0.69	0.09	0.06	0.13	0.61	0.55	0.65	0.45	0.25	0.82	0.413333	0.41	-0.18	-0.52	0.45	0.69	0.62	-0.32	-0.16	-0.39	0.01	0.3	-0.7	0.0175	0.013169	0.447419	20.4113	16.3565	0.0285483	0.517349	0.517349	12.528	11.914	10.897	6.729	11.58	17.246	23.939	22.338	14.619	12.953
Irf6:194995476.2	Irf6:194995476	Irf6	Proximal	chr1	194995476	194998166	0.61	0.28	0.17	0.54	0.75	0.75	0.29	0.39	0.26	0.46	0.55	0.12	0.430833	0.41	-0.18	-0.52	0.45	0.69	0.62	-0.32	-0.16	-0.39	0.01	0.3	-0.7	0.0175	0.013169	0.447419	20.4113	16.3565	0.0285483	0.517349	0.517349	12.528	11.914	10.897	6.729	11.58	17.246	23.939	22.338	14.619	12.953
Irgm2:58032966.1	Irgm2:58032966	Irgm2	Distal	chr11	58032966	58036281	0.56	0.31	0.28	0.36	0.45	0.49	0.64	0.57	0.63	0.43	0.38	0.55	0.470833	-0.45	0.13	0.14	0.17	-0.18	-0.3	-0.56	-0.3	-0.57	-0.12	-0.18	-0.22	-0.203333	0.020271	0.525277	27.9074	10.6777	-0.237989	0.283142	0.283142	12.707	14.923	18.606	15.902	15.724	22.91	33.751	47.236	36.536	21.971
Irgm2:58032966.4	Irgm2:58032966	Irgm2	Proximal	chr11	58032966	58033199	0.11	0.44	0.42	0.53	0.27	0.19	0.08	0.27	0.06	0.31	0.2	0.33	0.2675	-0.45	0.13	0.14	0.17	-0.18	-0.3	-0.56	-0.3	-0.57	-0.12	-0.18	-0.22	-0.203333	0.020271	0.525277	27.9074	10.6777	-0.237989	0.283142	0.283142	12.707	14.923	18.606	15.902	15.724	22.91	33.751	47.236	36.536	21.971
Itga1:115750342.1	Itga1:115750342	Itga1	Distal	chr13	115743304	115750342	0.21	0.25	0.26	0.38	0.25	0.22	0.22	0.23	0.28	0.26	0.14	0.21	0.2425	0.28	0.15	0.3	-0.28	0.01	0.32	0.25	0.24	0.15	-0.12	0.17	0.34	0.150833	0.0177895	0.507734	22.5187	1.64494	0.140098	0.206313	0.206313	1.648	1.627	2.118	2.62	2.401	3.045	3.75	3.459	3.808	3.996
Itga1:115750342.7	Itga1:115750342	Itga1	Proximal	chr13	115749889	115750342	0.49	0.4	0.56	0.1	0.26	0.54	0.47	0.47	0.43	0.14	0.31	0.55	0.393333	0.28	0.15	0.3	-0.28	0.01	0.32	0.25	0.24	0.15	-0.12	0.17	0.34	0.150833	0.0177895	0.507734	22.5187	1.64494	0.140098	0.206313	0.206313	1.648	1.627	2.118	2.62	2.401	3.045	3.75	3.459	3.808	3.996
Iws1:32256804.5	Iws1:32256804	Iws1	Distal	chr18	32256804	32263982	0.37	0.52	0.56	0.37	0.2	0.25	0.48	0.38	0.33	0.38	0.16	0.38	0.365	-0.22	-0.43	-0.51	-0.26	0.12	-0.01	-0.37	-0.17	-0.18	-0.02	0.25	-0.22	-0.168333	0.00562957	0.327273	21.9255	17.4398	-0.173534	0.231569	0.231569	2.879	3.359	5.652	5.936	3.847	5.407	8.22	9.323	9.387	7.324
Iws1:32256804.7	Iws1:32256804	Iws1	Proximal	chr18	32256804	32258105	0.15	0.09	0.05	0.11	0.32	0.24	0.11	0.21	0.15	0.36	0.41	0.16	0.196667	-0.22	-0.43	-0.51	-0.26	0.12	-0.01	-0.37	-0.17	-0.18	-0.02	0.25	-0.22	-0.168333	0.00562957	0.327273	21.9255	17.4398	-0.173534	0.231569	0.231569	2.879	3.359	5.652	5.936	3.847	5.407	8.22	9.323	9.387	7.324
Jak1:100826195.2	Jak1:100826195	Jak1	Distal	chr4	100824972	100826195	0.67	0.65	0.7	0.52	0.49	0.62	0.81	0.88	0.71	0.68	0.63	0.74	0.675	-0.43	-0.41	-0.5	-0.13	-0.17	-0.37	-0.69	-0.83	-0.63	-0.44	-0.43	-0.58	-0.4675	0.0284648	0.630645	24.41	15.6779	-0.467756	0.25449	0.25449	5.866	5.915	8.605	8.285	9.511	9.655	10.154	10.196	11.792	11.086
Jak1:100826195.3	Jak1:100826195	Jak1	Proximal	chr4	100825734	100826195	0.24	0.24	0.2	0.39	0.32	0.25	0.12	0.05	0.08	0.24	0.2	0.16	0.2075	-0.43	-0.41	-0.5	-0.13	-0.17	-0.37	-0.69	-0.83	-0.63	-0.44	-0.43	-0.58	-0.4675	0.0284648	0.630645	24.41	15.6779	-0.467756	0.25449	0.25449	5.866	5.915	8.605	8.285	9.511	9.655	10.154	10.196	11.792	11.086
Jtb:90039305.1	Jtb:90039305	Jtb	Distal	chr3	90039305	90039760	0.51	0.72	0.72	0.89	0.67	0.62	0.7	0.48	0.77	0.84	0.85	0.87	0.72	-0.02	-0.44	-0.44	-0.78	-0.34	-0.24	-0.4	0.04	-0.54	-0.68	-0.7	-0.74	-0.44	0.0263509	0.600257	27.3074	24.9629	-0.41313	0.267413	0.267413	16.103	15.543	14.132	15.552	14.72	26.074	38.739	39.443	32.537	29.293
Jtb:90039305.2	Jtb:90039305	Jtb	Proximal	chr3	90039305	90039626	0.49	0.28	0.28	0.11	0.33	0.38	0.3	0.52	0.23	0.16	0.15	0.13	0.28	-0.02	-0.44	-0.44	-0.78	-0.34	-0.24	-0.4	0.04	-0.54	-0.68	-0.7	-0.74	-0.44	0.0263509	0.600257	27.3074	24.9629	-0.41313	0.267413	0.267413	16.103	15.543	14.132	15.552	14.72	26.074	38.739	39.443	32.537	29.293
Kif2a:107752304.2	Kif2a:107752304	Kif2a	Distal	chr13	107750665	107752304	0.18	0.38	0.51	0.65	0.19	0.3	0.54	0.58	0.45	0.39	0.5	0.47	0.428333	0.18	-0.12	-0.36	-0.58	0	0.17	-0.32	-0.49	-0.14	-0.25	-0.3	-0.33	-0.211667	0.0259297	0.593447	20.088	19.0792	-0.230833	0.234438	0.234438	0.696	0.577	1.299	1.681	1.719	2.011	1.764	2.158	2.757	2.686
Kif2a:107752304.3	Kif2a:107752304	Kif2a	Proximal	chr13	107751654	107752304	0.36	0.26	0.15	0.07	0.19	0.47	0.22	0.09	0.31	0.14	0.2	0.14	0.216667	0.18	-0.12	-0.36	-0.58	0	0.17	-0.32	-0.49	-0.14	-0.25	-0.3	-0.33	-0.211667	0.0259297	0.593447	20.088	19.0792	-0.230833	0.234438	0.234438	0.696	0.577	1.299	1.681	1.719	2.011	1.764	2.158	2.757	2.686
Klhl21:151389444.1	Klhl21:151389444	Klhl21	Distal	chr4	151389444	151391789	0.67	0.91	0.92	0.91	0.71	0.7	0.91	0.89	0.94	0.92	0.69	0.69	0.821667	-0.34	-0.82	-0.84	-0.82	-0.42	-0.4	-0.82	-0.78	-0.88	-0.84	-0.38	-0.38	-0.643333	0.000510854	0.0876154	23.065	20.0773	-0.652825	0.270555	0.270555	2.295	2.57	6.559	3.735	3.123	4.333	4.923	4.916	9.866	8.772
Klhl21:151389444.2	Klhl21:151389444	Klhl21	Proximal	chr4	151389444	151391574	0.33	0.09	0.08	0.09	0.29	0.3	0.09	0.11	0.06	0.08	0.31	0.31	0.178333	-0.34	-0.82	-0.84	-0.82	-0.42	-0.4	-0.82	-0.78	-0.88	-0.84	-0.38	-0.38	-0.643333	0.000510854	0.0876154	23.065	20.0773	-0.652825	0.270555	0.270555	2.295	2.57	6.559	3.735	3.123	4.333	4.923	4.916	9.866	8.772
Leprot:101330443.3	Leprot:101330443	Leprot	Distal	chr4	101330443	101332006	0.24	0.25	0.2	0.19	0.21	0.23	0.21	0.2	0.19	0.33	0.29	0.21	0.229167	0.41	0.44	0.53	0.39	0.42	0.35	0.48	0.51	0.56	0.21	0.29	0.45	0.42	0.0366763	0.711394	20.3502	7.54727	0.423407	0.105913	0.105913	4.836	4.087	4.864	4.129	3.337	3.631	6.013	6.53	5.686	4.079
Leprot:101330443.4	Leprot:101330443	Leprot	Proximal	chr4	101330443	101331969	0.65	0.69	0.73	0.58	0.63	0.58	0.69	0.71	0.75	0.54	0.58	0.66	0.649167	0.41	0.44	0.53	0.39	0.42	0.35	0.48	0.51	0.56	0.21	0.29	0.45	0.42	0.0366763	0.711394	20.3502	7.54727	0.423407	0.105913	0.105913	4.836	4.087	4.864	4.129	3.337	3.631	6.013	6.53	5.686	4.079
Lgr4:109851408.1	Lgr4:109851408	Lgr4	Distal	chr2	109851408	109854409	0.29	0.36	0.13	0.32	0.26	0.52	0.71	0.44	0.43	0.66	0.82	0.86	0.483333	0.21	-0.07	0.56	0.16	-0.13	-0.38	-0.48	0.01	0.04	-0.45	-0.71	-0.79	-0.169167	0.0104073	0.403971	22.7723	7.7352	-0.158368	0.291722	0.291722	3.263	3.61	6.106	6.077	6.278	7.355	8.609	10.723	10.274	8.984
Lgr4:109851408.2	Lgr4:109851408	Lgr4	Proximal	chr2	109851408	109854382	0.5	0.29	0.69	0.48	0.13	0.14	0.23	0.45	0.47	0.21	0.11	0.07	0.314167	0.21	-0.07	0.56	0.16	-0.13	-0.38	-0.48	0.01	0.04	-0.45	-0.71	-0.79	-0.169167	0.0104073	0.403971	22.7723	7.7352	-0.158368	0.291722	0.291722	3.263	3.61	6.106	6.077	6.278	7.355	8.609	10.723	10.274	8.984
Lin54:100873296.2	Lin54:100873296	Lin54	Distal	chr5	100871052	100873296	0.2	0.18	0.4	0.07	0.15	0.15	0.18	0.48	0.33	0.19	0.17	0.23	0.2275	-0.12	-0.09	-0.29	0.02	0.03	-0.01	0.04	-0.32	-0.12	0	0.07	0.07	-0.06	0.0252361	0.583075	24.6567	17.7312	-0.0582361	0.133495	0.133495	0.437	0.653	1.237	1.394	0.894	1.059	1.593	1.814	1.969	1.67
Lin54:100873296.3	Lin54:100873296	Lin54	Proximal	chr5	100871077	100873296	0.08	0.09	0.11	0.09	0.18	0.14	0.22	0.16	0.21	0.19	0.24	0.3	0.1675	-0.12	-0.09	-0.29	0.02	0.03	-0.01	0.04	-0.32	-0.12	0	0.07	0.07	-0.06	0.0252361	0.583075	24.6567	17.7312	-0.0582361	0.133495	0.133495	0.437	0.653	1.237	1.394	0.894	1.059	1.593	1.814	1.969	1.67
Lpar6:73637698.1	Lpar6:73637698	Lpar6	Distal	chr14	73637698	73640151	0.04	0.1	0.22	0.19	0.28	0.2	0.04	0.11	0.11	0.27	0.18	0.27	0.1675	0.69	0.45	0.29	0.05	-0.03	0.38	0.69	0.67	0.25	0.05	0.4	0.32	0.350833	0.000205722	0.0652538	23.9438	1.25253	0.350315	0.316023	0.316023	27.027	29.784	29.436	37.013	21.951	43.559	77.943	73.966	68.974	66.986
Lpar6:73637698.4	Lpar6:73637698	Lpar6	Proximal	chr14	73637698	73639589	0.73	0.55	0.51	0.24	0.25	0.58	0.73	0.78	0.36	0.32	0.58	0.59	0.518333	0.69	0.45	0.29	0.05	-0.03	0.38	0.69	0.67	0.25	0.05	0.4	0.32	0.350833	0.000205722	0.0652538	23.9438	1.25253	0.350315	0.316023	0.316023	27.027	29.784	29.436	37.013	21.951	43.559	77.943	73.966	68.974	66.986
Lphn2:148480892.2	Lphn2:148480892	Lphn2	Distal	chr3	148478819	148480892	0.5	0.56	0.69	0.33	0.1	0.54	0.68	0.79	0.58	0.49	0.33	0.58	0.514167	-0.18	-0.27	-0.48	0.28	0.59	-0.16	-0.4	-0.67	-0.45	-0.26	-0.16	-0.22	-0.198333	0.00465521	0.297199	23.4697	16.5759	-0.199509	0.429749	0.429749	1.578	1.472	2.784	3.986	3.287	3.801	4.499	5.292	6.115	5.673
Lphn2:148480892.3	Lphn2:148480892	Lphn2	Proximal	chr3	148479385	148480892	0.32	0.29	0.21	0.61	0.69	0.38	0.28	0.12	0.13	0.23	0.17	0.36	0.315833	-0.18	-0.27	-0.48	0.28	0.59	-0.16	-0.4	-0.67	-0.45	-0.26	-0.16	-0.22	-0.198333	0.00465521	0.297199	23.4697	16.5759	-0.199509	0.429749	0.429749	1.578	1.472	2.784	3.986	3.287	3.801	4.499	5.292	6.115	5.673
Luc7l:26418570.1	Luc7l:26418570	Luc7l	Distal	chr17	26418570	26422449	0.73	0.43	0.46	0.72	0.78	0.69	0.66	0.63	0.69	0.72	0.73	0.7	0.661667	-0.6	-0.31	-0.34	-0.58	-0.68	-0.54	-0.57	-0.42	-0.6	-0.63	-0.64	-0.57	-0.54	0.00438526	0.293166	22.0859	5.39013	-0.540131	0.126668	0.126668	2.879	2.463	3.495	4.574	4.142	4.793	5.851	6.261	7.732	8.009
Luc7l:26418570.4	Luc7l:26418570	Luc7l	Proximal	chr17	26418570	26418826	0.13	0.12	0.12	0.14	0.1	0.15	0.09	0.21	0.09	0.09	0.09	0.13	0.121667	-0.6	-0.31	-0.34	-0.58	-0.68	-0.54	-0.57	-0.42	-0.6	-0.63	-0.64	-0.57	-0.54	0.00438526	0.293166	22.0859	5.39013	-0.540131	0.126668	0.126668	2.879	2.463	3.495	4.574	4.142	4.793	5.851	6.261	7.732	8.009
Magi1:93628996.1	Magi1:93628996	Magi1	Distal	chr6	93625447	93628996	0.64	0.52	0.59	0.52	0.44	0.59	0.77	0.83	0.5	0.51	0.6	0.8	0.609167	-0.56	-0.4	-0.46	-0.38	-0.13	-0.5	-0.7	-0.79	-0.3	-0.4	-0.48	-0.75	-0.4875	0.0447563	0.79412	22.1831	13.5739	-0.475923	0.207975	0.207975	0.804	0.853	1.385	1.74	2.033	3.292	2.549	2.349	2.626	2.912
Magi1:93628996.3	Magi1:93628996	Magi1	Proximal	chr6	93626441	93628996	0.08	0.12	0.13	0.14	0.31	0.09	0.07	0.04	0.2	0.11	0.12	0.05	0.121667	-0.56	-0.4	-0.46	-0.38	-0.13	-0.5	-0.7	-0.79	-0.3	-0.4	-0.48	-0.75	-0.4875	0.0447563	0.79412	22.1831	13.5739	-0.475923	0.207975	0.207975	0.804	0.853	1.385	1.74	2.033	3.292	2.549	2.349	2.626	2.912
Mal2:54432226.1	Mal2:54432226	Mal2	Distal	chr15	54432226	54434397	0.61	0.43	0.29	0.34	0.1	0.6	0.63	0.75	0.8	0.48	0.37	0.42	0.485	-0.33	0.04	0.24	0.21	0.75	-0.29	-0.31	-0.53	-0.63	-0.01	0.22	0.13	-0.0425	0.0352998	0.693419	26.6667	13.8563	-0.0598319	0.471035	0.471035	5.792	4.725	2.751	7.784	9.255	11.047	17.125	15.28	12.731	18.748
Mal2:54432226.2	Mal2:54432226	Mal2	Proximal	chr15	54432226	54434366	0.28	0.47	0.53	0.55	0.85	0.31	0.32	0.22	0.17	0.47	0.59	0.55	0.4425	-0.33	0.04	0.24	0.21	0.75	-0.29	-0.31	-0.53	-0.63	-0.01	0.22	0.13	-0.0425	0.0352998	0.693419	26.6667	13.8563	-0.0598319	0.471035	0.471035	5.792	4.725	2.751	7.784	9.255	11.047	17.125	15.28	12.731	18.748
Map4k3:80981275.1	Map4k3:80981275	Map4k3	Distal	chr17	80979857	80981275	0.52	0.48	0.79	0.62	0.85	0.55	0.72	0.85	0.85	0.77	0.73	0.45	0.681667	-0.37	-0.39	-0.66	-0.51	-0.75	-0.26	-0.47	-0.74	-0.73	-0.62	-0.51	-0.02	-0.5025	0.0352743	0.693419	22.5982	21.288	-0.514924	0.211245	0.211245	0.977	1.154	2.755	2.631	2.582	3.188	2.655	2.935	3.932	3.865
Map4k3:80981275.3	Map4k3:80981275	Map4k3	Proximal	chr17	80980989	80981275	0.15	0.09	0.13	0.11	0.1	0.29	0.25	0.11	0.12	0.15	0.22	0.43	0.179167	-0.37	-0.39	-0.66	-0.51	-0.75	-0.26	-0.47	-0.74	-0.73	-0.62	-0.51	-0.02	-0.5025	0.0352743	0.693419	22.5982	21.288	-0.514924	0.211245	0.211245	0.977	1.154	2.755	2.631	2.582	3.188	2.655	2.935	3.932	3.865
Mapk8:34195510.1	Mapk8:34195510	Mapk8	Distal	chr14	34191084	34195510	0.31	0.14	0.19	0.02	0.17	0.25	0.29	0.14	0.3	0.27	0.42	0.27	0.230833	0.06	0.28	0.3	0.28	-0.05	0.09	0.28	0.36	0.19	0.27	-0.04	0.04	0.171667	0.00244751	0.197922	22.8375	6.43618	0.175224	0.170188	0.170188	3.144	3.3	4.324	5.492	5.613	5.698	6.909	7.301	9.127	9.978
Mapk8:34195510.4	Mapk8:34195510	Mapk8	Proximal	chr14	34193978	34195510	0.37	0.42	0.49	0.3	0.12	0.34	0.57	0.5	0.49	0.54	0.38	0.31	0.4025	0.06	0.28	0.3	0.28	-0.05	0.09	0.28	0.36	0.19	0.27	-0.04	0.04	0.171667	0.00244751	0.197922	22.8375	6.43618	0.175224	0.170188	0.170188	3.144	3.3	4.324	5.492	5.613	5.698	6.909	7.301	9.127	9.978
Mars:126733496.3	Mars:126733496	Mars	Distal	chr10	126733277	126733496	0.13	0.25	0.4	0.58	0.67	0.36	0.09	0.28	0.6	0.64	0.72	0.63	0.445833	0.71	0.49	0.17	-0.17	-0.36	0.25	0.81	0.42	-0.21	-0.31	-0.47	-0.26	0.0891667	0.000190434	0.0652538	24.7616	0.982863	0.0984127	0.482767	0.482767	6.399	6.954	8.646	9.418	11.667	10.827	14.021	14.81	13.098	12.758
Mars:126733496.4	Mars:126733496	Mars	Proximal	chr10	126733352	126733496	0.84	0.74	0.57	0.41	0.31	0.61	0.9	0.7	0.39	0.33	0.25	0.37	0.535	0.71	0.49	0.17	-0.17	-0.36	0.25	0.81	0.42	-0.21	-0.31	-0.47	-0.26	0.0891667	0.000190434	0.0652538	24.7616	0.982863	0.0984127	0.482767	0.482767	6.399	6.954	8.646	9.418	11.667	10.827	14.021	14.81	13.098	12.758
Mcts1:35966398.1	Mcts1:35966398	Mcts1	Distal	chrX	35966398	35966701	0.33	0.13	0.09	0.06	0.29	0.39	0.2	0.18	0.12	0.14	0.04	0.13	0.175	0.34	0.74	0.82	0.88	0.42	0.22	0.6	0.64	0.76	0.72	0.92	0.74	0.65	0.0324439	0.669862	27.7021	9.92794	0.622092	0.214363	0.214363	8.319	6.687	6.396	10.647	8.139	10.388	16.507	17.29	16.93	20.511
Mcts1:35966398.2	Mcts1:35966398	Mcts1	Proximal	chrX	35966398	35966603	0.67	0.87	0.91	0.94	0.71	0.61	0.8	0.82	0.88	0.86	0.96	0.87	0.825	0.34	0.74	0.82	0.88	0.42	0.22	0.6	0.64	0.76	0.72	0.92	0.74	0.65	0.0324439	0.669862	27.7021	9.92794	0.622092	0.214363	0.214363	8.319	6.687	6.396	10.647	8.139	10.388	16.507	17.29	16.93	20.511
Med1:98014439.1	Med1:98014439	Med1	Distal	chr11	98013468	98014439	0	0.54	0.75	0.58	0.66	0.44	0.84	0.86	0.85	0.66	0.54	0.78	0.625	1	-0.08	-0.5	-0.16	-0.32	0.12	-0.68	-0.72	-0.7	-0.32	-0.08	-0.56	-0.25	0.0166933	0.485005	20.4113	18.2538	-0.273653	0.452409	0.452409	1.751	2.318	3.441	4.084	3.879	4.511	5.315	5.131	6.256	5.114
Med1:98014439.2	Med1:98014439	Med1	Proximal	chr11	98013604	98014439	1	0.46	0.25	0.42	0.34	0.56	0.16	0.14	0.15	0.34	0.46	0.22	0.375	1	-0.08	-0.5	-0.16	-0.32	0.12	-0.68	-0.72	-0.7	-0.32	-0.08	-0.56	-0.25	0.0166933	0.485005	20.4113	18.2538	-0.273653	0.452409	0.452409	1.751	2.318	3.441	4.084	3.879	4.511	5.315	5.131	6.256	5.114
Med6:82674947.2	Med6:82674947	Med6	Distal	chr12	82674426	82674947	0.16	0.19	0.46	0.35	0.21	0.21	0.06	0.1	0.15	0.2	0.5	0.17	0.23	0.66	0.61	0.03	0.26	0.54	0.55	0.86	0.79	0.68	0.58	0	0.65	0.5175	0.0106431	0.406615	27.7808	26.1147	0.544033	0.308709	0.308709	1.77	1.659	1.863	1.796	1.401	2.699	3.455	3.18	3.126	3.667
Med6:82674947.3	Med6:82674947	Med6	Proximal	chr12	82674551	82674947	0.82	0.8	0.49	0.61	0.75	0.76	0.92	0.89	0.83	0.78	0.5	0.82	0.7475	0.66	0.61	0.03	0.26	0.54	0.55	0.86	0.79	0.68	0.58	0	0.65	0.5175	0.0106431	0.406615	27.7808	26.1147	0.544033	0.308709	0.308709	1.77	1.659	1.863	1.796	1.401	2.699	3.455	3.18	3.126	3.667
Memo1:74600665.8	Memo1:74600665	Memo1	Distal	chr17	74600024	74600665	0.32	0.5	0.29	0.21	0.14	0.3	0.37	0.27	0.16	0.21	0.46	0.5	0.310833	0.13	-0.33	0.14	0.06	0.43	0.09	0.02	0.2	0.4	0.24	-0.3	-0.27	0.0675	0.0349638	0.693419	20.7259	14.2067	0.0873655	0.227954	0.227954	1.552	1.302	1.765	2.784	2.507	3.091	3.525	3.182	3.796	4.269
Memo1:74600665.9	Memo1:74600665	Memo1	Proximal	chr17	74600148	74600665	0.45	0.17	0.43	0.27	0.57	0.39	0.39	0.47	0.56	0.45	0.16	0.23	0.378333	0.13	-0.33	0.14	0.06	0.43	0.09	0.02	0.2	0.4	0.24	-0.3	-0.27	0.0675	0.0349638	0.693419	20.7259	14.2067	0.0873655	0.227954	0.227954	1.552	1.302	1.765	2.784	2.507	3.091	3.525	3.182	3.796	4.269
Mfap1a:121320583.1	Mfap1a:121320583	Mfap1a	Distal	chr2	121316360	121320583	0.19	0.16	0.19	0.11	0.1	0.2	0.2	0.13	0.11	0.15	0.17	0.21	0.16	0.11	0.09	0.37	0.16	0.43	0.11	-0.01	0.35	0.4	0.27	0.14	-0.08	0.195	0.0204833	0.525277	20.5243	12.8038	0.215455	0.170339	0.170339	0.471	0.462	0.715	1.302	0.542	1.305	2.504	2.125	2.106	2.981
Mfap1a:121320583.7	Mfap1a:121320583	Mfap1a	Proximal	chr2	121319489	121320583	0.3	0.25	0.56	0.27	0.53	0.31	0.19	0.48	0.51	0.42	0.31	0.13	0.355	0.11	0.09	0.37	0.16	0.43	0.11	-0.01	0.35	0.4	0.27	0.14	-0.08	0.195	0.0204833	0.525277	20.5243	12.8038	0.215455	0.170339	0.170339	0.471	0.462	0.715	1.302	0.542	1.305	2.504	2.125	2.106	2.981
Mff:82748160.1	Mff:82748160	Mff	Distal	chr1	82748160	82748965	0.48	0.65	0.78	0.62	0.27	0.57	0.74	0.68	0.64	0.61	0.64	0.72	0.616667	-0.15	-0.48	-0.7	-0.4	0.29	-0.36	-0.65	-0.57	-0.42	-0.35	-0.54	-0.57	-0.408333	0.0061073	0.344565	20.7259	16.8387	-0.408546	0.283609	0.283609	4.655	4.34	6.021	7.199	7.312	7.441	8.237	10.758	11.909	10.529
Mff:82748160.2	Mff:82748160	Mff	Proximal	chr1	82748160	82748356	0.33	0.17	0.08	0.22	0.56	0.21	0.09	0.11	0.22	0.26	0.1	0.15	0.208333	-0.15	-0.48	-0.7	-0.4	0.29	-0.36	-0.65	-0.57	-0.42	-0.35	-0.54	-0.57	-0.408333	0.0061073	0.344565	20.7259	16.8387	-0.408546	0.283609	0.283609	4.655	4.34	6.021	7.199	7.312	7.441	8.237	10.758	11.909	10.529
Mgat5:129379104.1	Mgat5:129379104	Mgat5	Distal	chr1	129379104	129384911	0.34	0.4	0.19	0.05	0.04	0.33	0.39	0.38	0.26	0.25	0.06	0.25	0.245	-0.13	-0.22	0.01	0.28	0.66	-0.04	-0.25	-0.17	0.11	0.03	0.35	0.21	0.07	0.000735423	0.0939019	24.2147	15.3873	0.0695669	0.320223	0.320223	#N/A	#N/A	#N/A	#N/A	#N/A	#N/A	#N/A	#N/A	#N/A	#N/A
Mgat5:129379104.3	Mgat5:129379104	Mgat5	Proximal	chr1	129379104	129383814	0.21	0.18	0.2	0.33	0.7	0.29	0.14	0.21	0.37	0.28	0.41	0.46	0.315	-0.13	-0.22	0.01	0.28	0.66	-0.04	-0.25	-0.17	0.11	0.03	0.35	0.21	0.07	0.000735423	0.0939019	24.2147	15.3873	0.0695669	0.320223	0.320223	#N/A	#N/A	#N/A	#N/A	#N/A	#N/A	#N/A	#N/A	#N/A	#N/A
Mlxipl:135613112.1	Mlxipl:135613112	Mlxipl	Distal	chr5	135613112	135615638	0.36	0.62	0.59	0.72	0.52	0.46	0.38	0.44	0.54	0.71	0.6	0.41	0.529167	-0.17	-0.51	-0.44	-0.65	-0.47	-0.17	-0.03	-0.34	-0.33	-0.64	-0.46	-0.11	-0.36	0.00092979	0.104818	26.2125	23.7659	-0.338569	0.257208	0.257208	4.182	4.462	6.241	5.437	5.64	9.381	10.189	10.475	9.77	8.908
Mlxipl:135613112.4	Mlxipl:135613112	Mlxipl	Proximal	chr5	135613112	135613792	0.19	0.11	0.15	0.07	0.05	0.29	0.35	0.1	0.21	0.07	0.14	0.3	0.169167	-0.17	-0.51	-0.44	-0.65	-0.47	-0.17	-0.03	-0.34	-0.33	-0.64	-0.46	-0.11	-0.36	0.00092979	0.104818	26.2125	23.7659	-0.338569	0.257208	0.257208	4.182	4.462	6.241	5.437	5.64	9.381	10.189	10.475	9.77	8.908
Mmgt1:53842480.1	Mmgt1:53842480	Mmgt1	Distal	chrX	53838687	53842480	0.38	0.53	0.42	0.31	0.11	0.49	0.75	0.62	0.56	0.59	0.48	0.68	0.493333	-0.19	-0.2	0	0.18	0.02	-0.3	-0.55	-0.3	-0.17	-0.26	-0.01	-0.46	-0.186667	0.0201366	0.525277	25.856	11.5115	-0.202238	0.241434	0.241434	10.35	10.833	10.632	18.342	17.109	17.77	22.693	22.409	20.96	29.213
Mmgt1:53842480.3	Mmgt1:53842480	Mmgt1	Proximal	chrX	53841659	53842480	0.19	0.33	0.42	0.49	0.13	0.19	0.2	0.32	0.39	0.33	0.47	0.22	0.306667	-0.19	-0.2	0	0.18	0.02	-0.3	-0.55	-0.3	-0.17	-0.26	-0.01	-0.46	-0.186667	0.0201366	0.525277	25.856	11.5115	-0.202238	0.241434	0.241434	10.35	10.833	10.632	18.342	17.109	17.77	22.693	22.409	20.96	29.213
Mpi:57392745.3	Mpi:57392745	Mpi	Distal	chr9	57392068	57392745	0.48	0.09	0.41	0.47	0.19	0.24	0.33	0.46	0.59	0.67	0.61	0.15	0.390833	-0.01	0.04	0.14	-0.02	0.44	0.42	0.29	0.04	-0.24	-0.47	-0.33	0.68	0.0816667	0.0242585	0.568536	27.8437	19.7239	0.130305	0.383251	0.383251	2.765	2.662	3.298	2.396	2.936	2.898	4.635	3.309	5.613	5.156
Mpi:57392745.4	Mpi:57392745	Mpi	Proximal	chr9	57392387	57392745	0.47	0.13	0.55	0.45	0.63	0.66	0.62	0.5	0.35	0.2	0.28	0.83	0.4725	-0.01	0.04	0.14	-0.02	0.44	0.42	0.29	0.04	-0.24	-0.47	-0.33	0.68	0.0816667	0.0242585	0.568536	27.8437	19.7239	0.130305	0.383251	0.383251	2.765	2.662	3.298	2.396	2.936	2.898	4.635	3.309	5.613	5.156
Mrps14:162129559.1	Mrps14:162129559	Mrps14	Distal	chr1	162129559	162130200	0.55	0.29	0.34	0.46	0.84	0.41	0.44	0.4	0.54	0.59	0.81	0.75	0.535	-0.1	0.42	0.32	0.08	-0.68	0.18	0.12	0.2	-0.08	-0.18	-0.62	-0.5	-0.07	0.022203	0.550947	22.9822	5.49476	-0.0670155	0.341296	0.341296	12.821	7.715	9.038	7.799	9.867	13.083	16.464	18.813	13.802	18.148
Mrps14:162129559.2	Mrps14:162129559	Mrps14	Proximal	chr1	162129559	162129951	0.45	0.71	0.66	0.54	0.16	0.59	0.56	0.6	0.46	0.41	0.19	0.25	0.465	-0.1	0.42	0.32	0.08	-0.68	0.18	0.12	0.2	-0.08	-0.18	-0.62	-0.5	-0.07	0.022203	0.550947	22.9822	5.49476	-0.0670155	0.341296	0.341296	12.821	7.715	9.038	7.799	9.867	13.083	16.464	18.813	13.802	18.148
Mrps5:127429365.1	Mrps5:127429365	Mrps5	Distal	chr2	127429365	127432565	0	0.31	0.13	0.18	0.34	0.21	0.38	0.17	0.25	0.32	0.56	0.38	0.269167	0	-0.03	0.35	0.1	-0.14	-0.02	-0.24	0.07	0.02	-0.21	-0.42	-0.25	-0.0641667	0.0425408	0.77597	22.1595	7.82067	-0.0560948	0.163596	0.163596	1.367	1.212	1.629	1.723	1.984	1.676	2.588	2.575	2.456	3.061
Mrps5:127429365.5	Mrps5:127429365	Mrps5	Proximal	chr2	127429365	127429722	0	0.28	0.48	0.28	0.2	0.19	0.14	0.24	0.27	0.11	0.14	0.13	0.205	0	-0.03	0.35	0.1	-0.14	-0.02	-0.24	0.07	0.02	-0.21	-0.42	-0.25	-0.0641667	0.0425408	0.77597	22.1595	7.82067	-0.0560948	0.163596	0.163596	1.367	1.212	1.629	1.723	1.984	1.676	2.588	2.575	2.456	3.061
Msl3:165092900.2	Msl3:165092900	Msl3	Distal	chrX	165092046	165092900	0.2	0.3	0.08	0.09	0.36	0.26	0.45	0.1	0.2	0.25	0.37	0.62	0.273333	0	-0.08	0.23	0.14	-0.18	-0.13	-0.05	0.67	0.49	0.27	0.09	-0.5	0.0791667	0.0280636	0.627486	23.9758	8.32208	0.0794807	0.328512	0.328512	4.392	3.498	5.14	5.109	5.831	6.214	9.338	8.875	7.819	8.011
Msl3:165092900.4	Msl3:165092900	Msl3	Proximal	chrX	165092776	165092900	0.2	0.22	0.31	0.23	0.18	0.13	0.4	0.77	0.69	0.52	0.46	0.12	0.3525	0	-0.08	0.23	0.14	-0.18	-0.13	-0.05	0.67	0.49	0.27	0.09	-0.5	0.0791667	0.0280636	0.627486	23.9758	8.32208	0.0794807	0.328512	0.328512	4.392	3.498	5.14	5.109	5.831	6.214	9.338	8.875	7.819	8.011
Msn:93361809.2	Msn:93361809	Msn	Distal	chrX	93361809	93363898	0.51	0.67	0.75	0.52	0.39	0.54	0.79	0.88	0.86	0.78	0.53	0.71	0.660833	-0.13	-0.43	-0.59	-0.11	0.15	-0.33	-0.63	-0.82	-0.8	-0.65	-0.17	-0.59	-0.425	0.0439354	0.792958	22.9729	16.896	-0.42797	0.384433	0.384433	1.97	2.373	2.389	2.204	2.255	2.631	2.966	3.306	2.967	2.72
Msn:93361809.3	Msn:93361809	Msn	Proximal	chrX	93361809	93363427	0.38	0.24	0.16	0.41	0.54	0.21	0.16	0.06	0.06	0.13	0.36	0.12	0.235833	-0.13	-0.43	-0.59	-0.11	0.15	-0.33	-0.63	-0.82	-0.8	-0.65	-0.17	-0.59	-0.425	0.0439354	0.792958	22.9729	16.896	-0.42797	0.384433	0.384433	1.97	2.373	2.389	2.204	2.255	2.631	2.966	3.306	2.967	2.72
Mtx3:93622739.1	Mtx3:93622739	Mtx3	Distal	chr13	93622739	93628185	0.26	0.39	0.48	0.58	0.47	0.52	0.52	0.56	0.63	0.55	0.51	0.59	0.505	-0.11	-0.21	-0.36	-0.51	-0.42	-0.38	-0.37	-0.49	-0.57	-0.49	-0.43	-0.52	-0.405	0.0224308	0.552457	20.1224	1.04501	-0.418734	0.106543	0.106543	3.521	4.879	6.74	5.917	5.317	7.728	11.086	14.176	12.777	9.091
Mtx3:93622739.2	Mtx3:93622739	Mtx3	Proximal	chr13	93622739	93626522	0.15	0.18	0.12	0.07	0.05	0.14	0.15	0.07	0.06	0.06	0.08	0.07	0.1	-0.11	-0.21	-0.36	-0.51	-0.42	-0.38	-0.37	-0.49	-0.57	-0.49	-0.43	-0.52	-0.405	0.0224308	0.552457	20.1224	1.04501	-0.418734	0.106543	0.106543	3.521	4.879	6.74	5.917	5.317	7.728	11.086	14.176	12.777	9.091
Mul1:137994866.3	Mul1:137994866	Mul1	Distal	chr4	137994866	137998160	0.69	0.35	0.36	0.42	0.52	0.61	0.64	0.41	0.48	0.2	0.45	0.49	0.468333	-0.58	-0.04	-0.11	-0.2	-0.31	-0.49	-0.54	-0.25	-0.23	-0.1	-0.29	-0.36	-0.291667	0.00072019	0.0939019	26.815	9.32752	-0.315398	0.213051	0.213051	7.372	5.57	5.835	5.684	5.135	7.207	10.358	8.959	11.205	9.236
Mul1:137994866.7	Mul1:137994866	Mul1	Proximal	chr4	137994866	137995818	0.11	0.31	0.25	0.22	0.21	0.12	0.1	0.16	0.25	0.1	0.16	0.13	0.176667	-0.58	-0.04	-0.11	-0.2	-0.31	-0.49	-0.54	-0.25	-0.23	-0.1	-0.29	-0.36	-0.291667	0.00072019	0.0939019	26.815	9.32752	-0.315398	0.213051	0.213051	7.372	5.57	5.835	5.684	5.135	7.207	10.358	8.959	11.205	9.236
Nags:102010232.2	Nags:102010232	Nags	Distal	chr11	102010232	102010847	0.24	0.27	0.49	0.62	0.49	0.1	0.42	0.16	0.56	0.47	0.17	0.47	0.371667	0.09	0.21	-0.19	-0.46	-0.23	0.55	0.06	0.54	-0.33	-0.11	0.51	0	0.0533333	0.0469679	0.816804	20.5261	2.39516	0.0173375	0.2957	0.2957	15.069	11.962	11.284	10.483	16.275	21.333	33.299	30.388	25.189	24.211
Nags:102010232.3	Nags:102010232	Nags	Proximal	chr11	102010232	102010791	0.33	0.48	0.3	0.16	0.26	0.65	0.48	0.7	0.23	0.36	0.68	0.47	0.425	0.09	0.21	-0.19	-0.46	-0.23	0.55	0.06	0.54	-0.33	-0.11	0.51	0	0.0533333	0.0469679	0.816804	20.5261	2.39516	0.0173375	0.2957	0.2957	15.069	11.962	11.284	10.483	16.275	21.333	33.299	30.388	25.189	24.211
Narg2:69279848.3	Narg2:69279848	Narg2	Distal	chr9	69279848	69280881	0	0.29	0.33	0.18	0.19	0.3	0.48	0.21	0.39	0.28	0.13	0.26	0.253333	0	-0.04	-0.1	0.38	0.34	0.12	-0.32	-0.09	-0.2	0.02	0.49	0	0.05	0.0284372	0.630645	25.3091	15.1019	0.0477063	0.290727	0.290727	1.784	1.635	2.27	2.898	3.211	3.109	4.697	5.094	5.553	6.057
Narg2:69279848.4	Narg2:69279848	Narg2	Proximal	chr9	69279848	69280445	0	0.25	0.23	0.56	0.53	0.42	0.16	0.12	0.19	0.3	0.62	0.26	0.303333	0	-0.04	-0.1	0.38	0.34	0.12	-0.32	-0.09	-0.2	0.02	0.49	0	0.05	0.0284372	0.630645	25.3091	15.1019	0.0477063	0.290727	0.290727	1.784	1.635	2.27	2.898	3.211	3.109	4.697	5.094	5.553	6.057
Ncaph2:89201742.1	Ncaph2:89201742	Ncaph2	Distal	chr15	89201742	89203284	0.31	0.34	0.3	0.35	0.38	0.24	0.17	0.21	0.36	0.31	0.34	0.26	0.2975	0.33	0.27	0.34	0.16	0.16	0.45	0.63	0.54	0.21	0.27	0.17	0.41	0.328333	0.0143891	0.465438	27.1859	24.8304	0.34586	0.176	0.176	8.481	8.767	7.953	5.747	6.744	8.819	12.785	12.858	9.058	7.782
Ncaph2:89201742.2	Ncaph2:89201742	Ncaph2	Proximal	chr15	89201742	89203258	0.64	0.61	0.64	0.51	0.54	0.69	0.8	0.75	0.57	0.58	0.51	0.67	0.625833	0.33	0.27	0.34	0.16	0.16	0.45	0.63	0.54	0.21	0.27	0.17	0.41	0.328333	0.0143891	0.465438	27.1859	24.8304	0.34586	0.176	0.176	8.481	8.767	7.953	5.747	6.744	8.819	12.785	12.858	9.058	7.782
Ncoa1:4249750.1	Ncoa1:4249750	Ncoa1	Distal	chr12	4247362	4249750	0.45	0.48	0.7	0.65	0.73	0.71	0.56	0.41	0.58	0.68	0.58	0.68	0.600833	-0.27	-0.09	-0.55	-0.55	-0.57	-0.6	-0.38	0.09	-0.35	-0.54	-0.43	-0.54	-0.398333	0.0163099	0.484877	26.9256	1.90953	-0.398994	0.233669	0.233669	0.471	0.669	1.023	1.299	1.251	1.36	1.613	1.777	1.976	1.728
Ncoa1:4249750.4	Ncoa1:4249750	Ncoa1	Proximal	chr12	4249525	4249750	0.18	0.39	0.15	0.1	0.16	0.11	0.18	0.5	0.23	0.14	0.15	0.14	0.2025	-0.27	-0.09	-0.55	-0.55	-0.57	-0.6	-0.38	0.09	-0.35	-0.54	-0.43	-0.54	-0.398333	0.0163099	0.484877	26.9256	1.90953	-0.398994	0.233669	0.233669	0.471	0.669	1.023	1.299	1.251	1.36	1.613	1.777	1.976	1.728
Nfya:48528667.1	Nfya:48528667	Nfya	Distal	chr17	48526214	48528667	0.3	0.2	0.25	0.16	0.29	0.58	0.4	0.32	0.35	0.67	0.39	0.6	0.375833	0.07	0.19	0.14	0.04	-0.19	-0.49	-0.24	0.1	0.18	-0.52	-0.07	-0.49	-0.106667	0.025906	0.593447	25.487	5.81001	-0.116041	0.225002	0.225002	2.615	1.675	3.016	3.282	3.928	3.04	3.417	3.351	3.673	4.918
Nfya:48528667.4	Nfya:48528667	Nfya	Proximal	chr17	48528357	48528667	0.37	0.39	0.39	0.2	0.1	0.09	0.16	0.42	0.53	0.15	0.32	0.11	0.269167	0.07	0.19	0.14	0.04	-0.19	-0.49	-0.24	0.1	0.18	-0.52	-0.07	-0.49	-0.106667	0.025906	0.593447	25.487	5.81001	-0.116041	0.225002	0.225002	2.615	1.675	3.016	3.282	3.928	3.04	3.417	3.351	3.673	4.918
Nr3c2:79766274.1	Nr3c2:79766274	Nr3c2	Distal	chr8	79766274	79769131	0.22	0.11	0.03	0.06	0.18	0.45	0.37	0.08	0.08	0.1	0.16	0.1	0.161667	0.34	0.51	0.59	0.51	0.5	-0.09	0.13	0.67	0.66	0.51	0.29	0.45	0.4225	0.0117614	0.425869	22.5778	10.3987	0.435108	0.208104	0.208104	0.658	0.78	1.901	1.73	1.584	1.941	2.342	2.637	4.23	2.642
Nr3c2:79766274.2	Nr3c2:79766274	Nr3c2	Proximal	chr8	79766274	79768908	0.56	0.62	0.62	0.57	0.68	0.36	0.5	0.75	0.74	0.61	0.45	0.55	0.584167	0.34	0.51	0.59	0.51	0.5	-0.09	0.13	0.67	0.66	0.51	0.29	0.45	0.4225	0.0117614	0.425869	22.5778	10.3987	0.435108	0.208104	0.208104	0.658	0.78	1.901	1.73	1.584	1.941	2.342	2.637	4.23	2.642
Nrxn1:90436724.1	Nrxn1:90436724	Nrxn1	Distal	chr17	90432981	90436724	0.31	0.27	0.22	0.21	0.22	0.32	0.28	0.22	0.19	0.27	0.35	0.19	0.254167	0.38	0.46	0.56	0.58	0.56	0.36	0.44	0.56	0.62	0.46	0.3	0.62	0.491667	0.0064118	0.345667	20.088	10.0484	0.504572	0.116581	0.116581	#N/A	#N/A	#N/A	#N/A	#N/A	#N/A	#N/A	#N/A	#N/A	#N/A
Nrxn1:90436724.2	Nrxn1:90436724	Nrxn1	Proximal	chr17	90433292	90436724	0.69	0.73	0.78	0.79	0.78	0.68	0.72	0.78	0.81	0.73	0.65	0.81	0.745833	0.38	0.46	0.56	0.58	0.56	0.36	0.44	0.56	0.62	0.46	0.3	0.62	0.491667	0.0064118	0.345667	20.088	10.0484	0.504572	0.116581	0.116581	#N/A	#N/A	#N/A	#N/A	#N/A	#N/A	#N/A	#N/A	#N/A	#N/A
Olfml1:114733662.2	Olfml1:114733662	Olfml1	Distal	chr7	114733662	114734881	0.56	0.22	0.11	0.11	0.54	0.48	0.49	0.38	0.22	0.11	0.38	0.27	0.3225	-0.23	0.26	0.66	0.62	-0.17	-0.17	-0.32	-0.25	0.14	0.29	-0.13	0.02	0.06	0.00173632	0.156012	27.1239	10.2363	0.0149993	0.398565	0.398565	4.093	2.816	5.136	3.175	3.228	3.446	5.077	4.873	6.551	5.919
Olfml1:114733662.3	Olfml1:114733662	Olfml1	Proximal	chr7	114733662	114734603	0.33	0.48	0.77	0.73	0.37	0.31	0.17	0.13	0.36	0.4	0.25	0.29	0.3825	-0.23	0.26	0.66	0.62	-0.17	-0.17	-0.32	-0.25	0.14	0.29	-0.13	0.02	0.06	0.00173632	0.156012	27.1239	10.2363	0.0149993	0.398565	0.398565	4.093	2.816	5.136	3.175	3.228	3.446	5.077	4.873	6.551	5.919
Orc3:34518267.1	Orc3:34518267	Orc3	Distal	chr4	34516544	34518267	0.24	0.25	0.42	0.17	0.24	0.18	0.57	0.46	0.37	0.21	0.29	0.32	0.31	0.15	-0.08	-0.04	0.24	0.2	0.38	-0.27	-0.17	0.01	0.35	-0.14	-0.09	0.045	0.036357	0.708451	20.088	15.9011	0.0552616	0.232015	0.232015	3.837	3.959	6.011	7.495	7.061	7.904	9.43	10.391	9.711	7.929
Orc3:34518267.4	Orc3:34518267	Orc3	Proximal	chr4	34518045	34518267	0.39	0.17	0.38	0.41	0.44	0.56	0.3	0.29	0.38	0.56	0.15	0.23	0.355	0.15	-0.08	-0.04	0.24	0.2	0.38	-0.27	-0.17	0.01	0.35	-0.14	-0.09	0.045	0.036357	0.708451	20.088	15.9011	0.0552616	0.232015	0.232015	3.837	3.959	6.011	7.495	7.061	7.904	9.43	10.391	9.711	7.929
Oxnad1:32915443.2	Oxnad1:32915443	Oxnad1	Distal	chr14	32915443	32916389	0.29	0.13	0.28	0.54	0.07	0.19	0.33	0.61	0.37	0.22	0.39	0.07	0.290833	0.21	0.45	0.28	-0.27	0.07	0.53	0.22	-0.32	-0.11	0.14	0.17	0.57	0.161667	0.0490896	0.832807	20.4113	1.43302	0.124614	0.287768	0.287768	4.216	4.02	3.45	3.205	3.223	5.038	6.796	5.87	6.032	6
Oxnad1:32915443.3	Oxnad1:32915443	Oxnad1	Proximal	chr14	32915443	32916297	0.5	0.58	0.56	0.27	0.14	0.72	0.55	0.29	0.26	0.36	0.56	0.64	0.4525	0.21	0.45	0.28	-0.27	0.07	0.53	0.22	-0.32	-0.11	0.14	0.17	0.57	0.161667	0.0490896	0.832807	20.4113	1.43302	0.124614	0.287768	0.287768	4.216	4.02	3.45	3.205	3.223	5.038	6.796	5.87	6.032	6
Oxr1:41690704.1	Oxr1:41690704	Oxr1	Distal	chr15	41690704	41692594	0.41	0.27	0.2	0.21	0.15	0.31	0.67	0.62	0.52	0.39	0.54	0.69	0.415	-0.34	-0.16	0.04	0.29	0.25	-0.18	-0.62	-0.57	-0.49	-0.28	-0.51	-0.65	-0.268333	0.0403388	0.75569	24.7183	12.5771	-0.275884	0.330853	0.330853	5.649	5.432	8.104	8.689	8.927	10.675	17.146	17.404	18.104	15.577
Oxr1:41690704.2	Oxr1:41690704	Oxr1	Proximal	chr15	41690704	41692462	0.07	0.11	0.24	0.5	0.4	0.13	0.05	0.05	0.03	0.11	0.03	0.04	0.146667	-0.34	-0.16	0.04	0.29	0.25	-0.18	-0.62	-0.57	-0.49	-0.28	-0.51	-0.65	-0.268333	0.0403388	0.75569	24.7183	12.5771	-0.275884	0.330853	0.330853	5.649	5.432	8.104	8.689	8.927	10.675	17.146	17.404	18.104	15.577
P2ry2:108147614.1	P2ry2:108147614	P2ry2	Distal	chr7	108143649	108147614	0	0.35	0.22	0.15	0.13	0.34	0.36	0.33	0.23	0.29	0.25	0.52	0.264167	0	-0.24	0.16	0.17	0.27	-0.17	-0.09	-0.09	0.33	-0.07	0.06	-0.36	-0.0025	0.0108184	0.410085	20.2045	13.7164	0.0218163	0.217752	0.217752	0.187	0.72	1.015	0.994	0.842	0.874	0.892	1.05	2.982	1.665
P2ry2:108147614.2	P2ry2:108147614	P2ry2	Proximal	chr7	108145082	108147614	0	0.11	0.38	0.32	0.4	0.17	0.27	0.24	0.56	0.22	0.31	0.16	0.261667	0	-0.24	0.16	0.17	0.27	-0.17	-0.09	-0.09	0.33	-0.07	0.06	-0.36	-0.0025	0.0108184	0.410085	20.2045	13.7164	0.0218163	0.217752	0.217752	0.187	0.72	1.015	0.994	0.842	0.874	0.892	1.05	2.982	1.665
Pank2:131122009.1	Pank2:131122009	Pank2	Distal	chr2	131122009	131124924	0.07	0.24	0.19	0.05	0.09	0.11	0.33	0.49	0.45	0.14	0.25	0.41	0.235	0.3	-0.14	0.13	0.02	0.13	0.21	-0.12	-0.32	-0.17	0.24	0.11	-0.15	0.02	0.0194943	0.525277	20.0539	17.7347	0.0134346	0.210573	0.210573	2.311	2.599	3.995	4.142	3.946	4.853	5.691	5.268	5.353	5.224
Pank2:131122009.4	Pank2:131122009	Pank2	Proximal	chr2	131122009	131122428	0.37	0.1	0.32	0.07	0.22	0.32	0.21	0.17	0.28	0.38	0.36	0.26	0.255	0.3	-0.14	0.13	0.02	0.13	0.21	-0.12	-0.32	-0.17	0.24	0.11	-0.15	0.02	0.0194943	0.525277	20.0539	17.7347	0.0134346	0.210573	0.210573	2.311	2.599	3.995	4.142	3.946	4.853	5.691	5.268	5.353	5.224
Paqr9:95460236.1	Paqr9:95460236	Paqr9	Distal	chr9	95460236	95468441	0.69	0.69	0.97	0.98	0.77	0.81	0.72	0.81	0.97	0.97	0.9	0.82	0.841667	-0.38	-0.39	-0.95	-0.97	-0.54	-0.62	-0.44	-0.62	-0.94	-0.95	-0.8	-0.64	-0.686667	0.000394535	0.0765714	24.0023	22.9051	-0.686642	0.256612	0.256612	126.477	143.121	112.195	150.013	255.718	283.46	407.048	352.175	227.134	243.806
Paqr9:95460236.2	Paqr9:95460236	Paqr9	Proximal	chr9	95460236	95462466	0.31	0.3	0.02	0.01	0.23	0.19	0.28	0.19	0.03	0.02	0.1	0.18	0.155	-0.38	-0.39	-0.95	-0.97	-0.54	-0.62	-0.44	-0.62	-0.94	-0.95	-0.8	-0.64	-0.686667	0.000394535	0.0765714	24.0023	22.9051	-0.686642	0.256612	0.256612	126.477	143.121	112.195	150.013	255.718	283.46	407.048	352.175	227.134	243.806
Pcf11:99793287.1	Pcf11:99793287	Pcf11	Distal	chr7	99791968	99793287	0.27	0.24	0.4	0.67	0.64	0.24	0.11	0.1	0.37	0.42	0.38	0.27	0.3425	0.08	0.12	0.15	-0.42	-0.34	-0.04	0.48	0.46	0.21	-0.14	0.14	0.08	0.065	0.020529	0.525277	23.3132	4.02729	0.0636253	0.350983	0.350983	3.44	3.051	8.366	7.12	8.391	9.081	10.491	12.672	16.931	12.085
Pcf11:99793287.2	Pcf11:99793287	Pcf11	Proximal	chr7	99792222	99793287	0.35	0.36	0.55	0.25	0.3	0.2	0.59	0.56	0.58	0.28	0.52	0.35	0.4075	0.08	0.12	0.15	-0.42	-0.34	-0.04	0.48	0.46	0.21	-0.14	0.14	0.08	0.065	0.020529	0.525277	23.3132	4.02729	0.0636253	0.350983	0.350983	3.44	3.051	8.366	7.12	8.391	9.081	10.491	12.672	16.931	12.085
Pcmtd2:181589643.1	Pcmtd2:181589643	Pcmtd2	Distal	chr2	181589643	181592152	0.41	0.57	0.39	0.39	0.3	0.17	0.39	0.47	0.76	0.69	0.77	0.46	0.480833	-0.06	-0.39	0.04	0.13	0.21	0.31	0.13	-0.16	-0.7	-0.57	-0.66	-0.01	-0.144167	0.0113929	0.421973	27.972	19.3417	-0.0946842	0.400577	0.400577	6.088	7.623	12.42	10.934	8.212	12.277	15.925	17.32	16.812	15.689
Pcmtd2:181589643.2	Pcmtd2:181589643	Pcmtd2	Proximal	chr2	181589643	181592065	0.35	0.18	0.43	0.52	0.51	0.48	0.52	0.31	0.06	0.12	0.11	0.45	0.336667	-0.06	-0.39	0.04	0.13	0.21	0.31	0.13	-0.16	-0.7	-0.57	-0.66	-0.01	-0.144167	0.0113929	0.421973	27.972	19.3417	-0.0946842	0.400577	0.400577	6.088	7.623	12.42	10.934	8.212	12.277	15.925	17.32	16.812	15.689
Pecam1:106516476.1	Pecam1:106516476	Pecam1	Distal	chr11	106515531	106516476	0.52	0.45	0.26	0.6	0.49	0.31	0.23	0.44	0.59	0.86	0.46	0.41	0.468333	-0.04	0.1	0.48	-0.2	0.02	0.38	0.54	0.12	-0.18	-0.72	0.08	0.18	0.0633333	0.0467989	0.816804	20.1573	4.61725	0.034867	0.330093	0.330093	1.766	1.978	1.756	1.606	1.756	1.682	1.5	1.406	1.183	1.501
Pecam1:106516476.2	Pecam1:106516476	Pecam1	Proximal	chr11	106515734	106516476	0.48	0.55	0.74	0.4	0.51	0.69	0.77	0.56	0.41	0.14	0.54	0.59	0.531667	-0.04	0.1	0.48	-0.2	0.02	0.38	0.54	0.12	-0.18	-0.72	0.08	0.18	0.0633333	0.0467989	0.816804	20.1573	4.61725	0.034867	0.330093	0.330093	1.766	1.978	1.756	1.606	1.756	1.682	1.5	1.406	1.183	1.501
Pfdn2:173287981.1	Pfdn2:173287981	Pfdn2	Distal	chr1	173287981	173289385	0.47	0.52	0.66	0.77	0.76	0.72	0.23	0.56	0.8	0.72	0.7	0.59	0.625	-0.16	-0.36	-0.44	-0.68	-0.66	-0.57	0.11	-0.26	-0.69	-0.6	-0.52	-0.3	-0.4275	0.000992694	0.104818	23.2811	1.63596	-0.433902	0.29016	0.29016	1.386	1.667	1.71	2.66	1.245	2.448	1.986	3.03	1.802	2.338
Pfdn2:173287981.2	Pfdn2:173287981	Pfdn2	Proximal	chr1	173287981	173288301	0.31	0.16	0.22	0.09	0.1	0.15	0.34	0.3	0.11	0.12	0.18	0.29	0.1975	-0.16	-0.36	-0.44	-0.68	-0.66	-0.57	0.11	-0.26	-0.69	-0.6	-0.52	-0.3	-0.4275	0.000992694	0.104818	23.2811	1.63596	-0.433902	0.29016	0.29016	1.386	1.667	1.71	2.66	1.245	2.448	1.986	3.03	1.802	2.338
Phc2:128428744.2	Phc2:128428744	Phc2	Distal	chr4	128428744	128430286	0.22	0.2	0.14	0.15	0.26	0.2	0.14	0.12	0.18	0.22	0.23	0.2	0.188333	0.43	0.48	0.5	0.52	0.29	0.46	0.64	0.62	0.5	0.43	0.41	0.47	0.479167	0.0370286	0.712948	20.4096	7.25299	0.481382	0.100111	0.100111	1.236	1.359	1.514	1.931	1.598	2.851	1.911	2.453	2.6	2.908
Phc2:128428744.3	Phc2:128428744	Phc2	Proximal	chr4	128428744	128430118	0.65	0.68	0.64	0.67	0.55	0.66	0.78	0.74	0.68	0.65	0.64	0.67	0.6675	0.43	0.48	0.5	0.52	0.29	0.46	0.64	0.62	0.5	0.43	0.41	0.47	0.479167	0.0370286	0.712948	20.4096	7.25299	0.481382	0.100111	0.100111	1.236	1.359	1.514	1.931	1.598	2.851	1.911	2.453	2.6	2.908
Pigy:57639872.6	Pigy:57639872	Pigy	Distal	chr6	57639338	57639872	0.61	0.63	0.82	0.61	0.45	0.43	0.66	0.69	0.7	0.51	0.69	0.62	0.618333	-0.49	-0.48	-0.78	-0.51	-0.16	-0.22	-0.58	-0.64	-0.62	-0.47	-0.56	-0.55	-0.505	0.0286201	0.631203	20.5312	17.9649	-0.512515	0.180012	0.180012	#N/A	#N/A	#N/A	#N/A	#N/A	#N/A	#N/A	#N/A	#N/A	#N/A
Pigy:57639872.7	Pigy:57639872	Pigy	Proximal	chr6	57639365	57639872	0.12	0.15	0.04	0.1	0.29	0.21	0.08	0.05	0.08	0.04	0.13	0.07	0.113333	-0.49	-0.48	-0.78	-0.51	-0.16	-0.22	-0.58	-0.64	-0.62	-0.47	-0.56	-0.55	-0.505	0.0286201	0.631203	20.5312	17.9649	-0.512515	0.180012	0.180012	#N/A	#N/A	#N/A	#N/A	#N/A	#N/A	#N/A	#N/A	#N/A	#N/A
Pion:20796356.2	Pion:20796356	Pion	Distal	chr5	20796356	20797542	0.55	0.28	0.08	0.15	0.24	0.12	0.67	0.41	0.36	0.35	0.45	0.56	0.351667	-0.34	0.03	0.1	0.17	0.01	0.09	-0.46	0.01	0.19	-0.01	-0.23	-0.36	-0.0666667	0.0241295	0.568536	22.5778	11.2448	-0.0531839	0.224162	0.224162	#N/A	#N/A	#N/A	#N/A	#N/A	#N/A	#N/A	#N/A	#N/A	#N/A
Pion:20796356.4	Pion:20796356	Pion	Proximal	chr5	20796356	20796555	0.21	0.31	0.18	0.32	0.25	0.21	0.21	0.42	0.55	0.34	0.22	0.2	0.285	-0.34	0.03	0.1	0.17	0.01	0.09	-0.46	0.01	0.19	-0.01	-0.23	-0.36	-0.0666667	0.0241295	0.568536	22.5778	11.2448	-0.0531839	0.224162	0.224162	#N/A	#N/A	#N/A	#N/A	#N/A	#N/A	#N/A	#N/A	#N/A	#N/A
Pitrm1:6578896.3	Pitrm1:6578896	Pitrm1	Distal	chr13	6578896	6579288	0.61	0.48	0.35	0.29	0.4	0.75	0.68	0.62	0.61	0.75	0.8	0.57	0.575833	-0.48	-0.18	0.1	-0.08	-0.26	-0.63	-0.5	-0.47	-0.4	-0.67	-0.74	-0.41	-0.393333	0.020733	0.525277	21.1912	9.15533	-0.37697	0.188762	0.188762	2.65	2.33	3.259	3.066	3.013	4.338	5.777	5.231	5.486	5.686
Pitrm1:6578896.4	Pitrm1:6578896	Pitrm1	Proximal	chr13	6578896	6579222	0.13	0.3	0.45	0.21	0.14	0.12	0.18	0.15	0.21	0.08	0.06	0.16	0.1825	-0.48	-0.18	0.1	-0.08	-0.26	-0.63	-0.5	-0.47	-0.4	-0.67	-0.74	-0.41	-0.393333	0.020733	0.525277	21.1912	9.15533	-0.37697	0.188762	0.188762	2.65	2.33	3.259	3.066	3.013	4.338	5.777	5.231	5.486	5.686
Pld1:28030436.2	Pld1:28030436	Pld1	Distal	chr3	28030436	28032161	0.21	0.48	0.46	0.25	0.21	0.33	0.48	0.65	0.57	0.42	0.45	0.5	0.4175	0.1	-0.31	-0.34	0.16	0.32	-0.03	-0.24	-0.52	-0.45	-0.17	-0.25	-0.37	-0.175	0.0243725	0.568536	20.31	16.8976	-0.174729	0.270026	0.270026	#N/A	#N/A	#N/A	#N/A	#N/A	#N/A	#N/A	#N/A	#N/A	#N/A
Pld1:28030436.3	Pld1:28030436	Pld1	Proximal	chr3	28030436	28031994	0.31	0.17	0.12	0.41	0.53	0.3	0.24	0.13	0.12	0.25	0.2	0.13	0.2425	0.1	-0.31	-0.34	0.16	0.32	-0.03	-0.24	-0.52	-0.45	-0.17	-0.25	-0.37	-0.175	0.0243725	0.568536	20.31	16.8976	-0.174729	0.270026	0.270026	#N/A	#N/A	#N/A	#N/A	#N/A	#N/A	#N/A	#N/A	#N/A	#N/A
Plxna2:196638260.1	Plxna2:196638260	Plxna2	Distal	chr1	196638260	196643056	0.87	0.83	0.76	0.79	0.87	0.93	0.92	0.87	0.83	0.71	0.88	0.89	0.845833	-0.74	-0.66	-0.52	-0.58	-0.74	-0.86	-0.84	-0.74	-0.66	-0.42	-0.76	-0.78	-0.691667	4.48e-05	0.0362431	26.747	8.37886	-0.710156	0.167292	0.167292	1.174	0.95	1.104	1.296	2.127	3.409	2.784	2.71	1.947	1.857
Plxna2:196638260.2	Plxna2:196638260	Plxna2	Proximal	chr1	196638260	196638765	0.13	0.17	0.24	0.21	0.13	0.07	0.08	0.13	0.17	0.29	0.12	0.11	0.154167	-0.74	-0.66	-0.52	-0.58	-0.74	-0.86	-0.84	-0.74	-0.66	-0.42	-0.76	-0.78	-0.691667	4.48e-05	0.0362431	26.747	8.37886	-0.710156	0.167292	0.167292	1.174	0.95	1.104	1.296	2.127	3.409	2.784	2.71	1.947	1.857
Plxnb1:109020354.1	Plxnb1:109020354	Plxnb1	Distal	chr9	109020354	109022544	0.19	0.21	0.16	0.27	0.1	0.14	0.12	0.19	0.3	0.31	0.18	0.22	0.199167	0.11	0.08	0.22	-0.01	0.25	0.3	0.36	0.24	-0.02	-0.19	0.09	0.16	0.1325	0.0122955	0.438661	27.972	22.2444	0.158088	0.171558	0.171558	1.765	2.401	3.552	3.016	3.687	3.855	4.144	4.742	5.202	4.113
Plxnb1:109020354.2	Plxnb1:109020354	Plxnb1	Proximal	chr9	109020354	109022423	0.3	0.29	0.38	0.26	0.35	0.44	0.48	0.43	0.28	0.12	0.27	0.38	0.331667	0.11	0.08	0.22	-0.01	0.25	0.3	0.36	0.24	-0.02	-0.19	0.09	0.16	0.1325	0.0122955	0.438661	27.972	22.2444	0.158088	0.171558	0.171558	1.765	2.401	3.552	3.016	3.687	3.855	4.144	4.742	5.202	4.113
Polg:86594923.4	Polg:86594923	Polg	Distal	chr7	86594268	86594923	0.46	0.41	0.38	0.16	0.12	0.47	0.62	0.25	0.07	0.37	0.21	0.26	0.315	-0.19	-0.11	0.05	0.47	0.26	-0.2	-0.36	0.24	0.58	0.05	0.37	0.1	0.105	0.0468119	0.816804	21.6281	12.6024	0.128926	0.270433	0.270433	2.875	4.308	5.759	4.878	4.296	6.081	7.427	7.831	8.744	6.989
Polg:86594923.5	Polg:86594923	Polg	Proximal	chr7	86594458	86594923	0.27	0.3	0.43	0.63	0.38	0.27	0.26	0.49	0.65	0.42	0.58	0.36	0.42	-0.19	-0.11	0.05	0.47	0.26	-0.2	-0.36	0.24	0.58	0.05	0.37	0.1	0.105	0.0468119	0.816804	21.6281	12.6024	0.128926	0.270433	0.270433	2.875	4.308	5.759	4.878	4.296	6.081	7.427	7.831	8.744	6.989
Ppm1k:57460843.1	Ppm1k:57460843	Ppm1k	Distal	chr6	57456494	57460843	0.73	0.7	0.58	0.43	0.66	0.65	0.86	0.77	0.67	0.73	0.79	0.8	0.6975	-0.64	-0.58	-0.51	-0.33	-0.46	-0.42	-0.83	-0.65	-0.37	-0.56	-0.76	-0.73	-0.57	0.0295571	0.640228	20.0201	13.7494	-0.55164	0.160193	0.160193	15.397	18.39	22.884	14.86	20.944	28.009	34.518	34.25	33.559	30.656
Ppm1k:57460843.2	Ppm1k:57460843	Ppm1k	Proximal	chr6	57459327	57460843	0.09	0.12	0.07	0.1	0.2	0.23	0.03	0.12	0.3	0.17	0.03	0.07	0.1275	-0.64	-0.58	-0.51	-0.33	-0.46	-0.42	-0.83	-0.65	-0.37	-0.56	-0.76	-0.73	-0.57	0.0295571	0.640228	20.0201	13.7494	-0.55164	0.160193	0.160193	15.397	18.39	22.884	14.86	20.944	28.009	34.518	34.25	33.559	30.656
Ppp1r7:95261467.2	Ppp1r7:95261467	Ppp1r7	Distal	chr1	95261467	95264199	0.49	0.36	0.48	0.26	0.46	0.64	0.56	0.41	0.36	0.41	0.54	0.61	0.465	-0.32	-0.14	-0.34	-0.01	-0.31	-0.54	-0.36	-0.23	-0.12	-0.17	-0.34	-0.49	-0.280833	0.0122755	0.438661	24.0935	8.96728	-0.281465	0.160157	0.160157	1.683	1.286	1.57	1.622	0.858	2.398	4.166	3.693	4.152	3.07
Ppp1r7:95261467.4	Ppp1r7:95261467	Ppp1r7	Proximal	chr1	95261467	95261884	0.17	0.22	0.14	0.25	0.15	0.1	0.2	0.18	0.24	0.24	0.2	0.12	0.184167	-0.32	-0.14	-0.34	-0.01	-0.31	-0.54	-0.36	-0.23	-0.12	-0.17	-0.34	-0.49	-0.280833	0.0122755	0.438661	24.0935	8.96728	-0.281465	0.160157	0.160157	1.683	1.286	1.57	1.622	0.858	2.398	4.166	3.693	4.152	3.07
Ppp3ca:136597993.1	Ppp3ca:136597993	Ppp3ca	Distal	chr3	136597993	136600688	0.56	0.65	0.6	0.08	0.23	0.68	0.55	0.31	0.44	0.37	0.41	0.61	0.4575	-0.47	-0.59	-0.41	0.13	0.09	-0.61	-0.43	-0.01	-0.25	-0.12	-0.27	-0.47	-0.284167	0.0159778	0.484877	20.0201	13.9846	-0.256027	0.257944	0.257944	0.826	0.836	1.571	1.906	1.809	2.441	2.571	2.894	3.419	3.601
Ppp3ca:136597993.3	Ppp3ca:136597993	Ppp3ca	Proximal	chr3	136597993	136600352	0.09	0.06	0.19	0.21	0.32	0.07	0.12	0.3	0.19	0.25	0.14	0.14	0.173333	-0.47	-0.59	-0.41	0.13	0.09	-0.61	-0.43	-0.01	-0.25	-0.12	-0.27	-0.47	-0.284167	0.0159778	0.484877	20.0201	13.9846	-0.256027	0.257944	0.257944	0.826	0.836	1.571	1.906	1.809	2.441	2.571	2.894	3.419	3.601
Ppp4r2:100816251.1	Ppp4r2:100816251	Ppp4r2	Distal	chr6	100816251	100819924	0.06	0.13	0.21	0.05	0.13	0.1	0.18	0.26	0.36	0.24	0.23	0.22	0.180833	0.29	0.18	0.11	0.1	0.25	0.15	0.37	0.17	-0.12	-0.05	-0.01	0.2	0.136667	0.00632407	0.344768	24.9804	22.2829	0.142841	0.146697	0.146697	1.666	1.676	2.554	3.488	3.129	3.606	4.484	4.925	5.842	6.195
Ppp4r2:100816251.6	Ppp4r2:100816251	Ppp4r2	Proximal	chr6	100816251	100818011	0.35	0.31	0.32	0.15	0.38	0.25	0.55	0.43	0.24	0.19	0.22	0.42	0.3175	0.29	0.18	0.11	0.1	0.25	0.15	0.37	0.17	-0.12	-0.05	-0.01	0.2	0.136667	0.00632407	0.344768	24.9804	22.2829	0.142841	0.146697	0.146697	1.666	1.676	2.554	3.488	3.129	3.606	4.484	4.925	5.842	6.195
Ppt1:122534753.1	Ppt1:122534753	Ppt1	Distal	chr4	122534753	122536234	0.11	0.11	0.42	0.33	0.25	0.21	0.26	0.35	0.27	0.36	0.05	0.06	0.231667	0.06	0.14	-0.26	-0.29	0.06	-0.08	0.01	-0.18	-0.19	-0.22	0.42	0.41	-0.01	0.0345687	0.693419	20.5888	0.745718	-0.0394353	0.239535	0.239535	3.856	3.327	4.094	2.984	3.445	5.288	5.895	6.799	6.272	5.507
Ppt1:122534753.3	Ppt1:122534753	Ppt1	Proximal	chr4	122534753	122535941	0.17	0.25	0.16	0.04	0.31	0.13	0.27	0.17	0.08	0.14	0.47	0.47	0.221667	0.06	0.14	-0.26	-0.29	0.06	-0.08	0.01	-0.18	-0.19	-0.22	0.42	0.41	-0.01	0.0345687	0.693419	20.5888	0.745718	-0.0394353	0.239535	0.239535	3.856	3.327	4.094	2.984	3.445	5.288	5.895	6.799	6.272	5.507
Prcp:100081482.2	Prcp:100081482	Prcp	Distal	chr7	100081482	100082524	0.32	0.35	0.17	0.19	0.06	0.3	0.28	0.22	0.18	0	0.17	0.3	0.211667	-0.09	-0.14	0.21	0.29	0.57	-0.11	-0.07	0.06	0.29	0	0.28	-0.11	0.0983333	0.048654	0.832807	21.5201	13.7563	0.115271	0.227972	0.227972	1.013	0.598	0.707	1.022	0.907	1.13	1.14	1.228	1.209	0.925
Prcp:100081482.4	Prcp:100081482	Prcp	Proximal	chr7	100081482	100081707	0.23	0.21	0.38	0.48	0.63	0.19	0.21	0.28	0.47	0	0.45	0.19	0.31	-0.09	-0.14	0.21	0.29	0.57	-0.11	-0.07	0.06	0.29	0	0.28	-0.11	0.0983333	0.048654	0.832807	21.5201	13.7563	0.115271	0.227972	0.227972	1.013	0.598	0.707	1.022	0.907	1.13	1.14	1.228	1.209	0.925
Preb:31258110.1	Preb:31258110	Preb	Distal	chr5	31254044	31258110	0.26	0.2	0.37	0.32	0.28	0.13	0.07	0.08	0.09	0.09	0.17	0.06	0.176667	0.39	0.45	0.2	0.25	0.4	0.69	0.85	0.8	0.78	0.67	0.61	0.83	0.576667	0.0139697	0.457981	27.5378	24.5686	0.600368	0.208254	0.208254	7.034	8.402	7.809	9.103	8.838	13.325	17.754	16.271	21.07	14.913
Preb:31258110.3	Preb:31258110	Preb	Proximal	chr5	31257415	31258110	0.65	0.65	0.57	0.57	0.68	0.82	0.92	0.88	0.87	0.76	0.78	0.89	0.753333	0.39	0.45	0.2	0.25	0.4	0.69	0.85	0.8	0.78	0.67	0.61	0.83	0.576667	0.0139697	0.457981	27.5378	24.5686	0.600368	0.208254	0.208254	7.034	8.402	7.809	9.103	8.838	13.325	17.754	16.271	21.07	14.913
Prrc1:57548874.1	Prrc1:57548874	Prrc1	Distal	chr18	57548874	57552610	0.73	0.65	0.25	0.19	0.51	0.51	0.7	0.39	0.32	0.45	0.65	0.73	0.506667	-0.63	-0.52	-0.05	0.17	-0.26	-0.38	-0.55	-0.1	0.18	-0.15	-0.5	-0.58	-0.280833	2.19e-07	0.00106133	21.7781	10.8752	-0.248006	0.360187	0.360187	1.159	1.038	1.622	2.357	2.271	2.276	3.54	3.34	3.55	3.692
Prrc1:57548874.3	Prrc1:57548874	Prrc1	Proximal	chr18	57548874	57549378	0.1	0.13	0.2	0.36	0.25	0.13	0.15	0.29	0.5	0.3	0.15	0.15	0.225833	-0.63	-0.52	-0.05	0.17	-0.26	-0.38	-0.55	-0.1	0.18	-0.15	-0.5	-0.58	-0.280833	2.19e-07	0.00106133	21.7781	10.8752	-0.248006	0.360187	0.360187	1.159	1.038	1.622	2.357	2.271	2.276	3.54	3.34	3.55	3.692
Pstpip2:78120541.1	Pstpip2:78120541	Pstpip2	Distal	chr18	78120541	78121555	0.37	0.18	0.41	0.46	0.74	0.38	0.23	0.15	0.19	0.5	0.54	0.06	0.350833	0.15	0.47	-0.03	-0.02	-0.53	0.03	0.26	0.59	0.52	-0.21	-0.11	0.7	0.151667	0.00958402	0.39077	22.4962	5.06035	0.151118	0.453619	0.453619	#N/A	#N/A	#N/A	#N/A	#N/A	#N/A	#N/A	#N/A	#N/A	#N/A
Pstpip2:78120541.3	Pstpip2:78120541	Pstpip2	Proximal	chr18	78120541	78120702	0.52	0.65	0.38	0.44	0.21	0.41	0.49	0.74	0.71	0.29	0.43	0.76	0.5025	0.15	0.47	-0.03	-0.02	-0.53	0.03	0.26	0.59	0.52	-0.21	-0.11	0.7	0.151667	0.00958402	0.39077	22.4962	5.06035	0.151118	0.453619	0.453619	#N/A	#N/A	#N/A	#N/A	#N/A	#N/A	#N/A	#N/A	#N/A	#N/A
Ptpmt1:90751476.1	Ptpmt1:90751476	Ptpmt1	Distal	chr2	90750872	90751476	0.21	0.41	0.26	0.21	0.21	0.25	0.34	0.3	0.29	0.24	0.17	0.3	0.265833	0.16	0	-0.13	0.35	0.44	0.37	0.27	0.12	0.36	0.43	0.61	0.32	0.275	0.000248966	0.0653756	22.2241	16.7014	0.27387	0.20771	0.20771	21.205	17.929	19.841	25.96	23.126	24.483	31.621	33.921	37.413	35.016
Ptpmt1:90751476.4	Ptpmt1:90751476	Ptpmt1	Proximal	chr2	90751144	90751476	0.37	0.41	0.13	0.56	0.65	0.62	0.61	0.42	0.65	0.67	0.78	0.62	0.540833	0.16	0	-0.13	0.35	0.44	0.37	0.27	0.12	0.36	0.43	0.61	0.32	0.275	0.000248966	0.0653756	22.2241	16.7014	0.27387	0.20771	0.20771	21.205	17.929	19.841	25.96	23.126	24.483	31.621	33.921	37.413	35.016
Qprt:134251755.3	Qprt:134251755	Qprt	Distal	chr7	134250782	134251755	0.49	0.52	0.39	0.31	0.34	0.32	0.56	0.52	0.45	0.36	0.45	0.52	0.435833	-0.12	-0.17	0.02	0.22	0.18	0.16	-0.23	-0.15	-0.03	0.08	-0.11	-0.27	-0.035	0.000868551	0.104796	20.8224	15.2647	-0.0247615	0.191278	0.191278	11.806	10.055	11.214	11.082	9.292	13.098	18.229	16.583	19.851	15.534
Qprt:134251755.5	Qprt:134251755	Qprt	Proximal	chr7	134251311	134251755	0.37	0.35	0.41	0.53	0.52	0.48	0.33	0.37	0.42	0.44	0.34	0.25	0.400833	-0.12	-0.17	0.02	0.22	0.18	0.16	-0.23	-0.15	-0.03	0.08	-0.11	-0.27	-0.035	0.000868551	0.104796	20.8224	15.2647	-0.0247615	0.191278	0.191278	11.806	10.055	11.214	11.082	9.292	13.098	18.229	16.583	19.851	15.534
Rangap1:81535688.1	Rangap1:81535688	Rangap1	Distal	chr15	81534683	81535688	0.34	0.62	0.54	0.45	0.45	0.46	0.42	0.67	0.75	0.78	0.31	0.36	0.5125	0.08	-0.33	-0.24	0	0.03	-0.02	0.07	-0.4	-0.57	-0.69	0.21	0.17	-0.140833	0.0237562	0.568384	24.5934	20.0373	-0.133298	0.333891	0.333891	1.78	1.773	2.154	2.418	3.263	3.12	3.11	3.344	4.002	4.355
Rangap1:81535688.2	Rangap1:81535688	Rangap1	Proximal	chr15	81535319	81535688	0.42	0.29	0.3	0.45	0.48	0.44	0.49	0.27	0.18	0.09	0.52	0.53	0.371667	0.08	-0.33	-0.24	0	0.03	-0.02	0.07	-0.4	-0.57	-0.69	0.21	0.17	-0.140833	0.0237562	0.568384	24.5934	20.0373	-0.133298	0.333891	0.333891	1.78	1.773	2.154	2.418	3.263	3.12	3.11	3.344	4.002	4.355
Rbm12b:12071149.1	Rbm12b:12071149	Rbm12b	Distal	chr4	12071149	12076069	0.17	0.47	0.28	0.1	0.17	0.2	0.35	0.3	0.24	0.19	0.12	0.15	0.228333	0.66	0.06	0.44	0.8	0.66	0.6	0.3	0.4	0.52	0.62	0.76	0.7	0.543333	0.0237803	0.568384	22.9673	15.9808	0.544117	0.231409	0.231409	#N/A	#N/A	#N/A	#N/A	#N/A	#N/A	#N/A	#N/A	#N/A	#N/A
Rbm12b:12071149.2	Rbm12b:12071149	Rbm12b	Proximal	chr4	12071149	12073892	0.83	0.53	0.72	0.9	0.83	0.8	0.65	0.7	0.76	0.81	0.88	0.85	0.771667	0.66	0.06	0.44	0.8	0.66	0.6	0.3	0.4	0.52	0.62	0.76	0.7	0.543333	0.0237803	0.568384	22.9673	15.9808	0.544117	0.231409	0.231409	#N/A	#N/A	#N/A	#N/A	#N/A	#N/A	#N/A	#N/A	#N/A	#N/A
Rbm18:35973494.1	Rbm18:35973494	Rbm18	Distal	chr2	35971599	35973494	0.74	0.4	0.79	0.81	0.87	0.81	0.73	0.63	0.8	0.81	0.66	0.48	0.710833	-0.48	0.2	-0.58	-0.62	-0.74	-0.62	-0.46	-0.26	-0.6	-0.62	-0.32	0.04	-0.421667	0.0165382	0.484877	20.3739	6.00078	-0.429208	0.264717	0.264717	1.836	1.964	3.004	2.75	4.061	3.941	5.281	6.151	6.045	7.474
Rbm18:35973494.2	Rbm18:35973494	Rbm18	Proximal	chr2	35973105	35973494	0.26	0.6	0.21	0.19	0.13	0.19	0.27	0.37	0.2	0.19	0.34	0.52	0.289167	-0.48	0.2	-0.58	-0.62	-0.74	-0.62	-0.46	-0.26	-0.6	-0.62	-0.32	0.04	-0.421667	0.0165382	0.484877	20.3739	6.00078	-0.429208	0.264717	0.264717	1.836	1.964	3.004	2.75	4.061	3.941	5.281	6.151	6.045	7.474
Rbms1:60591039.2	Rbms1:60591039	Rbms1	Distal	chr2	60588251	60591039	0.29	0.28	0.3	0.38	0.48	0.22	0.3	0.48	0.59	0.51	0.23	0.29	0.3625	-0.11	-0.07	-0.17	-0.22	-0.39	-0.09	-0.13	-0.28	-0.48	-0.38	0.09	0.01	-0.185	0.00213992	0.185374	20.228	1.96405	-0.209441	0.185604	0.185604	0.996	1.293	2.376	1.824	1.924	3.129	3.029	3.018	3.268	2.84
Rbms1:60591039.7	Rbms1:60591039	Rbms1	Proximal	chr2	60590851	60591039	0.18	0.21	0.13	0.16	0.09	0.13	0.17	0.2	0.11	0.13	0.32	0.3	0.1775	-0.11	-0.07	-0.17	-0.22	-0.39	-0.09	-0.13	-0.28	-0.48	-0.38	0.09	0.01	-0.185	0.00213992	0.185374	20.228	1.96405	-0.209441	0.185604	0.185604	0.996	1.293	2.376	1.824	1.924	3.129	3.029	3.018	3.268	2.84
Rcor1:112350085.2	Rcor1:112350085	Rcor1	Distal	chr12	112350085	112354107	0.24	0.32	0.46	0.54	0.43	0.23	0.44	0.66	0.41	0.39	0.45	0.37	0.411667	0.12	0.01	-0.22	-0.28	-0.16	0.17	-0.11	-0.54	-0.2	-0.04	-0.12	0.05	-0.11	0.00752689	0.371887	20.1224	0.436373	-0.134695	0.205604	0.205604	0.716	0.872	1.028	1.28	0.971	2.102	1.459	1.372	1.752	2.302
Rcor1:112350085.3	Rcor1:112350085	Rcor1	Proximal	chr12	112350085	112354078	0.36	0.33	0.24	0.26	0.27	0.4	0.33	0.12	0.21	0.35	0.33	0.42	0.301667	0.12	0.01	-0.22	-0.28	-0.16	0.17	-0.11	-0.54	-0.2	-0.04	-0.12	0.05	-0.11	0.00752689	0.371887	20.1224	0.436373	-0.134695	0.205604	0.205604	0.716	0.872	1.028	1.28	0.971	2.102	1.459	1.372	1.752	2.302
Rev3l:39593890.1	Rev3l:39593890	Rev3l	Distal	chr10	39593890	39595016	0	0.14	0.11	0.29	0.59	0.34	0.16	0.28	0.32	0.44	0.57	0.34	0.298333	0	-0.02	0.17	-0.09	-0.49	-0.21	0.27	-0.04	-0.02	-0.29	-0.51	0	-0.1025	0.011651	0.425041	22.1693	5.43356	-0.102143	0.270506	0.270506	1.088	1.323	1.719	2.351	2.1	2.847	3.653	3.77	4.077	4.636
Rev3l:39593890.3	Rev3l:39593890	Rev3l	Proximal	chr10	39593890	39594765	0	0.12	0.28	0.2	0.1	0.13	0.43	0.24	0.3	0.15	0.06	0.34	0.195833	0	-0.02	0.17	-0.09	-0.49	-0.21	0.27	-0.04	-0.02	-0.29	-0.51	0	-0.1025	0.011651	0.425041	22.1693	5.43356	-0.102143	0.270506	0.270506	1.088	1.323	1.719	2.351	2.1	2.847	3.653	3.77	4.077	4.636
Rhog:109388826.1	Rhog:109388826	Rhog	Distal	chr7	109383011	109388826	0.8	0.04	0.06	0.06	0.58	0.08	0.04	0.02	0.07	0.86	0.72	0.9	0.3525	-0.75	0.53	0.76	0.24	-0.54	0.26	0.72	0.81	0.64	-0.83	-0.68	-0.87	0.0241667	0.0322906	0.669547	22.1334	6.52435	0.0426265	0.751042	0.751042	#N/A	#N/A	#N/A	#N/A	#N/A	#N/A	#N/A	#N/A	#N/A	#N/A
Rhog:109388826.4	Rhog:109388826	Rhog	Proximal	chr7	109387637	109388826	0.05	0.57	0.82	0.3	0.04	0.34	0.76	0.83	0.71	0.03	0.04	0.03	0.376667	-0.75	0.53	0.76	0.24	-0.54	0.26	0.72	0.81	0.64	-0.83	-0.68	-0.87	0.0241667	0.0322906	0.669547	22.1334	6.52435	0.0426265	0.751042	0.751042	#N/A	#N/A	#N/A	#N/A	#N/A	#N/A	#N/A	#N/A	#N/A	#N/A
Rnf24:131129316.2	Rnf24:131129316	Rnf24	Distal	chr2	131124224	131129316	0.35	0.35	0.34	0.3	0.35	0.46	0.39	0.44	0.46	0.12	0.27	0.29	0.343333	-0.28	-0.13	-0.03	-0.19	-0.15	-0.37	-0.29	-0.35	-0.27	0.25	-0.02	-0.1	-0.160833	0.0240204	0.568536	27.7188	9.46519	-0.186249	0.187289	0.187289	0.757	1.087	1.163	0.944	1.108	1.421	1.655	1.717	2.223	1.519
Rnf24:131129316.3	Rnf24:131129316	Rnf24	Proximal	chr2	131126555	131129316	0.07	0.22	0.31	0.11	0.2	0.09	0.1	0.09	0.19	0.37	0.25	0.19	0.1825	-0.28	-0.13	-0.03	-0.19	-0.15	-0.37	-0.29	-0.35	-0.27	0.25	-0.02	-0.1	-0.160833	0.0240204	0.568536	27.7188	9.46519	-0.186249	0.187289	0.187289	0.757	1.087	1.163	0.944	1.108	1.421	1.655	1.717	2.223	1.519
Rpl7l1:46912685.2	Rpl7l1:46912685	Rpl7l1	Distal	chr17	46910849	46912685	0.29	0.22	0.23	0.33	0.46	0.24	0.35	0.35	0.33	0.23	0.33	0.42	0.315	-0.2	0.09	0.2	-0.18	-0.31	-0.21	-0.12	-0.04	-0.03	-0.01	0.05	-0.3	-0.0883333	0.0180345	0.510557	27.2164	7.04197	-0.109357	0.174628	0.174628	17.077	12.536	12.717	16.185	17.001	19.081	19.192	21.412	20.427	23.333
Rpl7l1:46912685.3	Rpl7l1:46912685	Rpl7l1	Proximal	chr17	46912050	46912685	0.09	0.31	0.43	0.15	0.15	0.03	0.23	0.31	0.3	0.22	0.38	0.12	0.226667	-0.2	0.09	0.2	-0.18	-0.31	-0.21	-0.12	-0.04	-0.03	-0.01	0.05	-0.3	-0.0883333	0.0180345	0.510557	27.2164	7.04197	-0.109357	0.174628	0.174628	17.077	12.536	12.717	16.185	17.001	19.081	19.192	21.412	20.427	23.333
Rps3:106627461.2	Rps3:106627461	Rps3	Distal	chr7	106627359	106627461	0.11	0.13	0.18	0.6	0.1	0.02	0.05	0.14	0.15	0.49	0.12	0.14	0.185833	0.75	0.72	0.62	-0.26	0.79	0.94	0.9	0.71	0.67	-0.03	0.76	0.71	0.606667	0.0408686	0.762671	25.3091	23.2947	0.625838	0.361747	0.361747	898.731	826.99	758.621	738.967	637.612	606.263	397.419	493.139	475.983	413.719
Rps3:106627461.3	Rps3:106627461	Rps3	Proximal	chr7	106627392	106627461	0.86	0.85	0.8	0.34	0.89	0.96	0.95	0.85	0.82	0.46	0.88	0.85	0.7925	0.75	0.72	0.62	-0.26	0.79	0.94	0.9	0.71	0.67	-0.03	0.76	0.71	0.606667	0.0408686	0.762671	25.3091	23.2947	0.625838	0.361747	0.361747	898.731	826.99	758.621	738.967	637.612	606.263	397.419	493.139	475.983	413.719
Rps6kb1:86316464.1	Rps6kb1:86316464	Rps6kb1	Distal	chr11	86312511	86316464	0.33	0.43	0.44	0.34	0.23	0.33	0.37	0.5	0.58	0.4	0.29	0.35	0.3825	-0.2	-0.34	-0.35	-0.21	-0.13	-0.02	-0.18	-0.33	-0.46	-0.2	0.17	-0.08	-0.194167	1.95e-05	0.0189634	23.102	19.4312	-0.199728	0.186532	0.186532	2.543	2.465	4.415	6.137	4.966	6.26	8.174	8.653	9.943	10.568
Rps6kb1:86316464.7	Rps6kb1:86316464	Rps6kb1	Proximal	chr11	86315657	86316464	0.13	0.09	0.09	0.13	0.1	0.31	0.19	0.17	0.12	0.2	0.46	0.27	0.188333	-0.2	-0.34	-0.35	-0.21	-0.13	-0.02	-0.18	-0.33	-0.46	-0.2	0.17	-0.08	-0.194167	1.95e-05	0.0189634	23.102	19.4312	-0.199728	0.186532	0.186532	2.543	2.465	4.415	6.137	4.966	6.26	8.174	8.653	9.943	10.568
Rsrc1:67160143.1	Rsrc1:67160143	Rsrc1	Distal	chr3	67160143	67162318	0.68	0.56	0.28	0.1	0.11	0.22	0.62	0.71	0.68	0.51	0.2	0.44	0.425833	-0.59	-0.35	-0.08	0.45	0.54	0.19	-0.48	-0.63	-0.62	-0.32	0.3	-0.26	-0.154167	0.00019372	0.0652538	27.8437	15.348	-0.1487	0.538622	0.538622	0.393	0.388	0.619	0.782	0.661	0.948	1.176	1.315	1.556	1.397
Rsrc1:67160143.2	Rsrc1:67160143	Rsrc1	Proximal	chr3	67160143	67161921	0.09	0.21	0.2	0.55	0.65	0.41	0.14	0.08	0.06	0.19	0.5	0.18	0.271667	-0.59	-0.35	-0.08	0.45	0.54	0.19	-0.48	-0.63	-0.62	-0.32	0.3	-0.26	-0.154167	0.00019372	0.0652538	27.8437	15.348	-0.1487	0.538622	0.538622	0.393	0.388	0.619	0.782	0.661	0.948	1.176	1.315	1.556	1.397
Scai:38930676.1	Scai:38930676	Scai	Distal	chr2	38921734	38930676	0.24	0.17	0.13	0.17	0.22	0.25	0.46	0.38	0.12	0.28	0.22	0.29	0.244167	-0.1	-0.01	0	0	-0.03	-0.15	-0.39	-0.17	0.12	-0.01	-0.1	-0.15	-0.0825	0.00520809	0.327243	25.242	9.41838	-0.0898412	0.138269	0.138269	0.496	0.463	0.615	0.857	0.713	0.863	1.206	1.435	1.925	1.277
Scai:38930676.2	Scai:38930676	Scai	Proximal	chr2	38921854	38930676	0.14	0.16	0.13	0.17	0.19	0.1	0.07	0.21	0.24	0.27	0.12	0.14	0.161667	-0.1	-0.01	0	0	-0.03	-0.15	-0.39	-0.17	0.12	-0.01	-0.1	-0.15	-0.0825	0.00520809	0.327243	25.242	9.41838	-0.0898412	0.138269	0.138269	0.496	0.463	0.615	0.857	0.713	0.863	1.206	1.435	1.925	1.277
Scpep1:88786038.1	Scpep1:88786038	Scpep1	Distal	chr11	88785334	88786038	0.6	0.21	0.25	0.19	0.66	0.47	0.41	0.3	0.13	0.68	0.55	0.29	0.395	-0.2	0.58	0.5	0.62	-0.32	0.06	0.18	0.4	0.74	-0.36	-0.1	0.42	0.21	0.0229405	0.560753	20.198	7.93217	0.22942	0.444783	0.444783	1.022	1.266	2.131	1.453	1.436	2.372	4.68	5.412	5.024	3.514
Scpep1:88786038.2	Scpep1:88786038	Scpep1	Proximal	chr11	88785413	88786038	0.4	0.79	0.75	0.81	0.34	0.53	0.59	0.7	0.87	0.32	0.45	0.71	0.605	-0.2	0.58	0.5	0.62	-0.32	0.06	0.18	0.4	0.74	-0.36	-0.1	0.42	0.21	0.0229405	0.560753	20.198	7.93217	0.22942	0.444783	0.444783	1.022	1.266	2.131	1.453	1.436	2.372	4.68	5.412	5.024	3.514
Sdccag3:26239214.1	Sdccag3:26239214	Sdccag3	Distal	chr2	26238322	26239214	0.46	0.64	0.63	0.34	0.21	0.44	0.46	0.25	0.21	0.15	0.24	0.37	0.366667	0.08	-0.28	-0.26	0.32	0.58	0.12	0.08	0.5	0.58	0.7	0.52	0.26	0.266667	0.0362166	0.708451	21.8576	14.3102	0.279955	0.251443	0.251443	6.948	5.611	5.266	7.883	7.48	9.859	17.018	14.499	16.506	16.304
Sdccag3:26239214.2	Sdccag3:26239214	Sdccag3	Proximal	chr2	26238878	26239214	0.54	0.36	0.37	0.66	0.79	0.56	0.54	0.75	0.79	0.85	0.76	0.63	0.633333	0.08	-0.28	-0.26	0.32	0.58	0.12	0.08	0.5	0.58	0.7	0.52	0.26	0.266667	0.0362166	0.708451	21.8576	14.3102	0.279955	0.251443	0.251443	6.948	5.611	5.266	7.883	7.48	9.859	17.018	14.499	16.506	16.304
Sel1l:93048493.1	Sel1l:93048493	Sel1l	Distal	chr12	93044483	93048493	0.58	0.55	0.59	0.78	0.84	0.7	0.59	0.56	0.65	0.8	0.83	0.57	0.67	-0.48	-0.22	-0.29	-0.65	-0.73	-0.56	-0.25	-0.43	-0.46	-0.71	-0.73	-0.28	-0.4825	1.37e-05	0.0166503	21.9472	5.09193	-0.485249	0.252184	0.252184	6.444	10.309	10.971	15.247	18.958	19.37	25.045	24.53	25.368	29.231
Sel1l:93048493.2	Sel1l:93048493	Sel1l	Proximal	chr12	93046777	93048493	0.1	0.33	0.3	0.13	0.11	0.14	0.34	0.13	0.19	0.09	0.1	0.29	0.1875	-0.48	-0.22	-0.29	-0.65	-0.73	-0.56	-0.25	-0.43	-0.46	-0.71	-0.73	-0.28	-0.4825	1.37e-05	0.0166503	21.9472	5.09193	-0.485249	0.252184	0.252184	6.444	10.309	10.971	15.247	18.958	19.37	25.045	24.53	25.368	29.231
Sept10:58627692.3	Sept10:58627692	Sept10	Distal	chr10	58626864	58627692	0.39	0.24	0.46	0.22	0	0.26	0.45	0.58	0.46	0.45	0.19	0.38	0.34	-0.23	-0.02	-0.36	0	0	-0.01	-0.31	-0.49	-0.39	-0.27	0	-0.2	-0.19	0.0380668	0.724315	23.6959	16.8562	-0.190568	0.20837	0.20837	1.34	1.471	1.846	1.915	1.601	2.596	3.126	3.301	3.151	2.959
Sept10:58627692.5	Sept10:58627692	Sept10	Proximal	chr10	58627132	58627692	0.16	0.22	0.1	0.22	0	0.25	0.14	0.09	0.07	0.18	0.19	0.18	0.15	-0.23	-0.02	-0.36	0	0	-0.01	-0.31	-0.49	-0.39	-0.27	0	-0.2	-0.19	0.0380668	0.724315	23.6959	16.8562	-0.190568	0.20837	0.20837	1.34	1.471	1.846	1.915	1.601	2.596	3.126	3.301	3.151	2.959
Serinc5:93477948.1	Serinc5:93477948	Serinc5	Distal	chr13	93477948	93482062	0.12	0.07	0.07	0.06	0.07	0.22	0.12	0.11	0.05	0.08	0.09	0.14	0.1	0.6	0.73	0.8	0.81	0.78	0.5	0.7	0.73	0.82	0.78	0.74	0.64	0.719167	0.000150974	0.0652538	23.7919	10.6829	0.720139	0.108322	0.108322	1.057	1.525	1.689	1.794	1.984	2.128	3.327	3.556	3.344	2.858
Serinc5:93477948.2	Serinc5:93477948	Serinc5	Proximal	chr13	93477948	93481902	0.72	0.8	0.87	0.87	0.85	0.72	0.82	0.84	0.87	0.86	0.83	0.78	0.819167	0.6	0.73	0.8	0.81	0.78	0.5	0.7	0.73	0.82	0.78	0.74	0.64	0.719167	0.000150974	0.0652538	23.7919	10.6829	0.720139	0.108322	0.108322	1.057	1.525	1.689	1.794	1.984	2.128	3.327	3.556	3.344	2.858
Sf3b2:5274527.1	Sf3b2:5274527	Sf3b2	Distal	chr19	5273932	5274527	0.78	0.51	0.86	0.93	0.89	0.69	0.7	0.82	0.86	0.91	0.83	0.61	0.7825	-0.56	-0.02	-0.72	-0.86	-0.78	-0.38	-0.4	-0.64	-0.72	-0.82	-0.66	-0.22	-0.565	0.000925738	0.104818	20.2725	3.51321	-0.598205	0.297399	0.297399	3.211	2.913	4.997	3.545	5.046	6.206	5.734	7.245	6.784	6.578
Sf3b2:5274527.2	Sf3b2:5274527	Sf3b2	Proximal	chr19	5274306	5274527	0.22	0.49	0.14	0.07	0.11	0.31	0.3	0.18	0.14	0.09	0.17	0.39	0.2175	-0.56	-0.02	-0.72	-0.86	-0.78	-0.38	-0.4	-0.64	-0.72	-0.82	-0.66	-0.22	-0.565	0.000925738	0.104818	20.2725	3.51321	-0.598205	0.297399	0.297399	3.211	2.913	4.997	3.545	5.046	6.206	5.734	7.245	6.784	6.578
Sfpq:126707071.1	Sfpq:126707071	Sfpq	Distal	chr4	126707071	126708476	0.54	0.71	0.55	0.59	0.6	0.65	0.68	0.66	0.43	0.37	0.73	0.83	0.611667	-0.44	-0.61	-0.38	-0.29	-0.31	-0.44	-0.54	-0.51	-0.09	-0.05	-0.58	-0.78	-0.418333	0.000148571	0.0652538	20.0201	14.354	-0.393266	0.25261	0.25261	8.696	9.741	16.197	23.875	25.364	24.666	25.176	29.204	41.58	45.338
Sfpq:126707071.2	Sfpq:126707071	Sfpq	Proximal	chr4	126707071	126708040	0.1	0.1	0.17	0.3	0.29	0.21	0.14	0.15	0.34	0.32	0.15	0.05	0.193333	-0.44	-0.61	-0.38	-0.29	-0.31	-0.44	-0.54	-0.51	-0.09	-0.05	-0.58	-0.78	-0.418333	0.000148571	0.0652538	20.0201	14.354	-0.393266	0.25261	0.25261	8.696	9.741	16.197	23.875	25.364	24.666	25.176	29.204	41.58	45.338
Sgms1:32199014.1	Sgms1:32199014	Sgms1	Distal	chr19	32197220	32199014	0.31	0.22	0.45	0.19	0.11	0.27	0.5	0.65	0.51	0.4	0.21	0.15	0.330833	-0.12	-0.12	-0.09	0.18	-0.01	-0.03	-0.36	-0.53	-0.41	-0.25	0.18	0.16	-0.116667	0.00560998	0.327273	27.6577	14.4846	-0.122043	0.281692	0.281692	0.648	0.788	1.524	1.64	1.157	1.365	1.358	1.633	1.764	1.943
Sgms1:32199014.2	Sgms1:32199014	Sgms1	Proximal	chr19	32197335	32199014	0.19	0.1	0.36	0.37	0.1	0.24	0.14	0.12	0.1	0.15	0.39	0.31	0.214167	-0.12	-0.12	-0.09	0.18	-0.01	-0.03	-0.36	-0.53	-0.41	-0.25	0.18	0.16	-0.116667	0.00560998	0.327273	27.6577	14.4846	-0.122043	0.281692	0.281692	0.648	0.788	1.524	1.64	1.157	1.365	1.358	1.633	1.764	1.943
Sik2:50701494.1	Sik2:50701494	Sik2	Distal	chr9	50697749	50701494	0.32	0.31	0.2	0.26	0.29	0.32	0.49	0.4	0.24	0.28	0.59	0.57	0.355833	0.09	0.21	0.46	0.41	0.24	0.25	-0.03	0.1	0.45	0.29	-0.31	-0.25	0.159167	0.0078179	0.371887	22.4136	10.8886	0.175162	0.237329	0.237329	0.542	0.694	1.037	1.347	1.357	1.872	1.721	1.792	3.07	2.144
Sik2:50701494.2	Sik2:50701494	Sik2	Proximal	chr9	50697846	50701494	0.41	0.52	0.66	0.67	0.53	0.57	0.46	0.5	0.69	0.57	0.28	0.32	0.515	0.09	0.21	0.46	0.41	0.24	0.25	-0.03	0.1	0.45	0.29	-0.31	-0.25	0.159167	0.0078179	0.371887	22.4136	10.8886	0.175162	0.237329	0.237329	0.542	0.694	1.037	1.347	1.357	1.872	1.721	1.792	3.07	2.144
Slc17a5:78386106.1	Slc17a5:78386106	Slc17a5	Distal	chr9	78384294	78386106	0.51	0.43	0.16	0.4	0.28	0.22	0.44	0.6	0.53	0.42	0.33	0.22	0.378333	-0.23	0.01	0.55	0.16	0.4	0.36	0.04	-0.25	-0.27	0.07	0.28	0.48	0.133333	0.0326197	0.670639	26.6667	15.9835	0.138543	0.316426	0.316426	1.03	1.126	1.492	2.179	1.673	2.315	3.6	3.12	3.975	3.057
Slc17a5:78386106.3	Slc17a5:78386106	Slc17a5	Proximal	chr9	78385799	78386106	0.28	0.44	0.71	0.56	0.68	0.58	0.48	0.35	0.26	0.49	0.61	0.7	0.511667	-0.23	0.01	0.55	0.16	0.4	0.36	0.04	-0.25	-0.27	0.07	0.28	0.48	0.133333	0.0326197	0.670639	26.6667	15.9835	0.138543	0.316426	0.316426	1.03	1.126	1.492	2.179	1.673	2.315	3.6	3.12	3.975	3.057
Slc1a2:102617813.1	Slc1a2:102617813	Slc1a2	Distal	chr2	102617813	102619715	0.31	0.46	0.67	0.58	0.32	0.41	0.28	0.51	0.71	0.54	0.35	0.31	0.454167	0.38	0.08	-0.34	-0.16	0.36	0.18	0.44	-0.02	-0.42	-0.08	0.3	0.38	0.0916667	1.26e-05	0.0166503	23.1716	20.9804	0.0791402	0.362037	0.362037	5.075	8.078	14.471	17.372	15.229	12.825	11.054	15.457	23.289	24.976
Slc1a2:102617813.2	Slc1a2:102617813	Slc1a2	Proximal	chr2	102617813	102618263	0.69	0.54	0.33	0.42	0.68	0.59	0.72	0.49	0.29	0.46	0.65	0.69	0.545833	0.38	0.08	-0.34	-0.16	0.36	0.18	0.44	-0.02	-0.42	-0.08	0.3	0.38	0.0916667	1.26e-05	0.0166503	23.1716	20.9804	0.0791402	0.362037	0.362037	5.075	8.078	14.471	17.372	15.229	12.825	11.054	15.457	23.289	24.976
Slc35d2:64198992.1	Slc35d2:64198992	Slc35d2	Distal	chr13	64197616	64198992	0.39	0.36	0.3	0.33	0.28	0.3	0.39	0.43	0.31	0.23	0.26	0.37	0.329167	0.22	0.28	0.4	0.34	0.44	0.4	0.22	0.14	0.38	0.54	0.48	0.26	0.341667	0.00775182	0.371887	23.6241	14.0616	0.342848	0.139975	0.139975	7.267	6.708	7.092	6.33	8.058	11.024	14.838	15.042	10.63	11.271
Slc35d2:64198992.2	Slc35d2:64198992	Slc35d2	Proximal	chr13	64198453	64198992	0.61	0.64	0.7	0.67	0.72	0.7	0.61	0.57	0.69	0.77	0.74	0.63	0.670833	0.22	0.28	0.4	0.34	0.44	0.4	0.22	0.14	0.38	0.54	0.48	0.26	0.341667	0.00775182	0.371887	23.6241	14.0616	0.342848	0.139975	0.139975	7.267	6.708	7.092	6.33	8.058	11.024	14.838	15.042	10.63	11.271
Slc6a6:91704908.1	Slc6a6:91704908	Slc6a6	Distal	chr6	91704908	91709060	0.45	0.25	0.2	0.22	0.4	0.33	0.57	0.42	0.38	0.27	0.42	0.42	0.360833	-0.39	-0.16	-0.04	-0.06	-0.35	-0.25	-0.49	-0.34	-0.25	-0.2	-0.16	-0.31	-0.25	0.00157033	0.150522	27.7397	9.64721	-0.272576	0.16806	0.16806	2.201	3.159	4.131	4.651	4.592	5.203	5.558	5.996	8.184	5.787
Slc6a6:91704908.4	Slc6a6:91704908	Slc6a6	Proximal	chr6	91704908	91705442	0.06	0.09	0.16	0.16	0.05	0.08	0.08	0.08	0.13	0.07	0.26	0.11	0.110833	-0.39	-0.16	-0.04	-0.06	-0.35	-0.25	-0.49	-0.34	-0.25	-0.2	-0.16	-0.31	-0.25	0.00157033	0.150522	27.7397	9.64721	-0.272576	0.16806	0.16806	2.201	3.159	4.131	4.651	4.592	5.203	5.558	5.996	8.184	5.787
Slmo2:174291437.1	Slmo2:174291437	Slmo2	Distal	chr2	174290564	174291437	0.18	0.54	0.52	0.14	0.18	0.22	0.33	0.17	0.13	0.15	0.21	0.3	0.255833	0.5	-0.31	-0.32	0.26	0.53	0.44	0.21	0.58	0.6	0.61	0.45	0.15	0.308333	0.0129782	0.447419	20.7259	14.695	0.32632	0.244705	0.244705	8.756	8.447	9.124	12.813	10.577	12.376	16.28	14.373	15.473	19.99
Slmo2:174291437.2	Slmo2:174291437	Slmo2	Proximal	chr2	174290599	174291437	0.68	0.23	0.2	0.4	0.71	0.66	0.54	0.75	0.73	0.76	0.66	0.45	0.564167	0.5	-0.31	-0.32	0.26	0.53	0.44	0.21	0.58	0.6	0.61	0.45	0.15	0.308333	0.0129782	0.447419	20.7259	14.695	0.32632	0.244705	0.244705	8.756	8.447	9.124	12.813	10.577	12.376	16.28	14.373	15.473	19.99
Smc5:23283458.5	Smc5:23283458	Smc5	Distal	chr19	23281418	23283458	0.32	0.23	0.24	0.13	0.22	0.18	0.26	0.13	0.11	0.09	0.11	0.11	0.1775	-0.18	-0.1	-0.02	0.09	0.07	-0.09	-0.16	0.04	0	0.13	0.03	0.01	-0.015	0.000359498	0.0726785	23.7122	12.8857	-0.0140368	0.102597	0.102597	1.244	0.956	1.138	1.634	1.873	2.451	4.238	4.455	3.446	3.547
Smc5:23283458.6	Smc5:23283458	Smc5	Proximal	chr19	23281520	23283458	0.14	0.13	0.22	0.22	0.29	0.09	0.1	0.17	0.11	0.22	0.14	0.12	0.1625	-0.18	-0.1	-0.02	0.09	0.07	-0.09	-0.16	0.04	0	0.13	0.03	0.01	-0.015	0.000359498	0.0726785	23.7122	12.8857	-0.0140368	0.102597	0.102597	1.244	0.956	1.138	1.634	1.873	2.451	4.238	4.455	3.446	3.547
Snx33:56766511.7	Snx33:56766511	Snx33	Distal	chr9	56765009	56766511	0.16	0.14	0.14	0.16	0.15	0.33	0.28	0.18	0.11	0.23	0.19	0.25	0.193333	0.11	0.24	0.33	0.06	0	-0.21	-0.04	0.07	-0.01	-0.06	-0.03	-0.17	0.0241667	0.0422336	0.773273	25.3909	7.1198	0.0179142	0.123176	0.123176	3.39	4.203	3.519	2.938	3.296	5.573	5.702	4.784	3.832	3.419
Snx33:56766511.8	Snx33:56766511	Snx33	Proximal	chr9	56765635	56766511	0.27	0.38	0.47	0.22	0.15	0.12	0.24	0.25	0.1	0.17	0.16	0.08	0.2175	0.11	0.24	0.33	0.06	0	-0.21	-0.04	0.07	-0.01	-0.06	-0.03	-0.17	0.0241667	0.0422336	0.773273	25.3909	7.1198	0.0179142	0.123176	0.123176	3.39	4.203	3.519	2.938	3.296	5.573	5.702	4.784	3.832	3.419
Sppl3:115547135.1	Sppl3:115547135	Sppl3	Distal	chr5	115547135	115548799	0.36	0.51	0.18	0.05	0.29	0.34	0.5	0.34	0.32	0.16	0.34	0.33	0.31	0.06	-0.12	0.42	0.82	0.35	0.22	-0.06	0.27	0.17	0.57	0.21	0.08	0.249167	0.00303877	0.230377	22.9614	12.6611	0.260604	0.305753	0.305753	0.844	0.883	1.122	1.243	1.87	2.167	1.861	1.961	2.042	2.061
Sppl3:115547135.2	Sppl3:115547135	Sppl3	Proximal	chr5	115547135	115548263	0.42	0.39	0.6	0.87	0.64	0.56	0.44	0.61	0.49	0.73	0.55	0.41	0.559167	0.06	-0.12	0.42	0.82	0.35	0.22	-0.06	0.27	0.17	0.57	0.21	0.08	0.249167	0.00303877	0.230377	22.9614	12.6611	0.260604	0.305753	0.305753	0.844	0.883	1.122	1.243	1.87	2.167	1.861	1.961	2.042	2.061
Srsf10:135419644.1	Srsf10:135419644	Srsf10	Distal	chr4	135419644	135422210	0.05	0.29	0.52	0.46	0.19	0.17	0.18	0.34	0.33	0.35	0.65	0.29	0.318333	0.9	0.42	-0.04	0.08	0.62	0.66	0.64	0.32	0.34	0.3	-0.3	0.42	0.363333	0.0213157	0.533112	27.6001	22.5208	0.411501	0.350231	0.350231	4.822	4.666	5.854	7.919	8.067	10.639	13.593	13.001	13.892	16.169
Srsf10:135419644.2	Srsf10:135419644	Srsf10	Proximal	chr4	135419644	135421746	0.95	0.71	0.48	0.54	0.81	0.83	0.82	0.66	0.67	0.65	0.35	0.71	0.681667	0.9	0.42	-0.04	0.08	0.62	0.66	0.64	0.32	0.34	0.3	-0.3	0.42	0.363333	0.0213157	0.533112	27.6001	22.5208	0.411501	0.350231	0.350231	4.822	4.666	5.854	7.919	8.067	10.639	13.593	13.001	13.892	16.169
Ssh1:114393474.1	Ssh1:114393474	Ssh1	Distal	chr5	114387106	114393474	0.37	0.47	0.5	0.31	0.29	0.26	0.45	0.58	0.69	0.34	0.43	0.45	0.428333	-0.19	-0.4	-0.36	-0.09	-0.02	0.09	-0.33	-0.52	-0.64	-0.26	-0.26	-0.34	-0.276667	0.00833615	0.372039	23.5629	17.2376	-0.278195	0.270509	0.270509	#N/A	#N/A	#N/A	#N/A	#N/A	#N/A	#N/A	#N/A	#N/A	#N/A
Ssh1:114393474.2	Ssh1:114393474	Ssh1	Proximal	chr5	114389341	114393474	0.18	0.07	0.14	0.22	0.27	0.35	0.12	0.06	0.05	0.08	0.17	0.11	0.151667	-0.19	-0.4	-0.36	-0.09	-0.02	0.09	-0.33	-0.52	-0.64	-0.26	-0.26	-0.34	-0.276667	0.00833615	0.372039	23.5629	17.2376	-0.278195	0.270509	0.270509	#N/A	#N/A	#N/A	#N/A	#N/A	#N/A	#N/A	#N/A	#N/A	#N/A
Stim2:54509511.2	Stim2:54509511	Stim2	Distal	chr5	54509511	54511173	0.36	0.41	0.11	0.07	0.1	0.36	0.3	0.2	0.08	0.07	0.45	0.56	0.255833	-0.08	-0.15	0.32	0.65	0.45	-0.16	-0.08	0.15	0.39	0.51	-0.23	-0.33	0.12	3.12e-06	0.00757031	20.3314	13.0112	0.171242	0.420818	0.420818	1.031	0.878	1.783	3.115	2.557	2.993	2.715	3.56	6.004	5.474
Stim2:54509511.3	Stim2:54509511	Stim2	Proximal	chr5	54509511	54510940	0.28	0.26	0.43	0.72	0.55	0.2	0.22	0.35	0.47	0.58	0.22	0.23	0.375833	-0.08	-0.15	0.32	0.65	0.45	-0.16	-0.08	0.15	0.39	0.51	-0.23	-0.33	0.12	3.12e-06	0.00757031	20.3314	13.0112	0.171242	0.420818	0.420818	1.031	0.878	1.783	3.115	2.557	2.993	2.715	3.56	6.004	5.474
Stom:35171575.1	Stom:35171575	Stom	Distal	chr2	35169505	35171575	0.82	0.74	0.64	0.77	0.9	0.81	0.62	0.58	0.75	0.72	0.82	0.47	0.72	-0.68	-0.52	-0.36	-0.58	-0.84	-0.7	-0.41	-0.25	-0.56	-0.59	-0.73	-0.11	-0.5275	0.000301254	0.0664401	20.1573	7.507	-0.52112	0.247963	0.247963	8.225	7.443	7.597	5.857	6.916	7.666	14.418	13.532	11.321	8.355
Stom:35171575.2	Stom:35171575	Stom	Proximal	chr2	35170281	35171575	0.14	0.22	0.28	0.19	0.06	0.11	0.21	0.33	0.19	0.13	0.09	0.36	0.1925	-0.68	-0.52	-0.36	-0.58	-0.84	-0.7	-0.41	-0.25	-0.56	-0.59	-0.73	-0.11	-0.5275	0.000301254	0.0664401	20.1573	7.507	-0.52112	0.247963	0.247963	8.225	7.443	7.597	5.857	6.916	7.666	14.418	13.532	11.321	8.355
Stxbp5:9480752.5	Stxbp5:9480752	Stxbp5	Distal	chr10	9479751	9480752	0.21	0	0.16	0.15	0.46	0.36	0.44	0.28	0.32	0.53	0.23	0.39	0.294167	0	0	0.01	-0.08	-0.3	-0.28	-0.2	0.07	-0.16	-0.39	-0.14	-0.01	-0.123333	0.0300407	0.643975	20.4448	7.09967	-0.120894	0.14321	0.14321	1.024	0.902	1.564	1.736	1.595	1.984	2.024	2.189	2.505	2.797
Stxbp5:9480752.6	Stxbp5:9480752	Stxbp5	Proximal	chr10	9480293	9480752	0.21	0	0.17	0.07	0.16	0.08	0.24	0.35	0.16	0.14	0.09	0.38	0.170833	0	0	0.01	-0.08	-0.3	-0.28	-0.2	0.07	-0.16	-0.39	-0.14	-0.01	-0.123333	0.0300407	0.643975	20.4448	7.09967	-0.120894	0.14321	0.14321	1.024	0.902	1.564	1.736	1.595	1.984	2.024	2.189	2.505	2.797
Tank:61491436.2	Tank:61491436	Tank	Distal	chr2	61491436	61492172	0.41	0.33	0.4	0.27	0.3	0.34	0.4	0.42	0.05	0.3	0.25	0.24	0.309167	-0.07	0.18	0.03	0.36	0.25	0.17	0.08	0.03	0.03	0.25	0.4	0.29	0.166667	0.00381382	0.268184	26.2857	14.7998	0.164496	0.154045	0.154045	1.334	1.297	2.116	3.557	2.323	3.143	3.986	5.056	5.748	6.071
Tank:61491436.3	Tank:61491436	Tank	Proximal	chr2	61491436	61492147	0.34	0.51	0.43	0.63	0.55	0.51	0.48	0.45	0.08	0.55	0.65	0.53	0.475833	-0.07	0.18	0.03	0.36	0.25	0.17	0.08	0.03	0.03	0.25	0.4	0.29	0.166667	0.00381382	0.268184	26.2857	14.7998	0.164496	0.154045	0.154045	1.334	1.297	2.116	3.557	2.323	3.143	3.986	5.056	5.748	6.071
Tardbp:147991744.1	Tardbp:147991744	Tardbp	Distal	chr4	147986496	147991744	0.2	0.27	0.36	0.28	0.3	0.18	0.2	0.2	0.35	0.36	0.17	0.19	0.255	0.05	-0.08	-0.2	-0.01	-0.15	0.2	0.13	0.17	-0.04	-0.25	0.02	0.1	-0.005	0.00354566	0.256769	27.013	22.9749	0.014771	0.169384	0.169384	20.7	17.904	23.706	24.871	30.163	42.247	64.201	59.328	61.806	54.972
Tardbp:147991744.6	Tardbp:147991744	Tardbp	Proximal	chr4	147990103	147991744	0.25	0.19	0.16	0.27	0.15	0.38	0.33	0.37	0.31	0.11	0.19	0.29	0.25	0.05	-0.08	-0.2	-0.01	-0.15	0.2	0.13	0.17	-0.04	-0.25	0.02	0.1	-0.005	0.00354566	0.256769	27.013	22.9749	0.014771	0.169384	0.169384	20.7	17.904	23.706	24.871	30.163	42.247	64.201	59.328	61.806	54.972
Taz:71534638.3	Taz:71534638	Taz	Distal	chrX	71534638	71535488	0.93	0.89	0.76	0.84	0.78	0.85	0.97	0.91	0.9	0.8	0.9	0.91	0.87	-0.89	-0.79	-0.54	-0.72	-0.57	-0.72	-0.94	-0.84	-0.81	-0.62	-0.81	-0.82	-0.755833	0.0488037	0.832807	24.1537	12.905	-0.756481	0.135517	0.135517	7.254	7.619	6.14	6.382	6.994	9.923	14.337	12.347	12.814	8.594
Taz:71534638.4	Taz:71534638	Taz	Proximal	chrX	71534638	71534931	0.04	0.1	0.22	0.12	0.21	0.13	0.03	0.07	0.09	0.18	0.09	0.09	0.114167	-0.89	-0.79	-0.54	-0.72	-0.57	-0.72	-0.94	-0.84	-0.81	-0.62	-0.81	-0.82	-0.755833	0.0488037	0.832807	24.1537	12.905	-0.756481	0.135517	0.135517	7.254	7.619	6.14	6.382	6.994	9.923	14.337	12.347	12.814	8.594
Tbc1d14:36835763.1	Tbc1d14:36835763	Tbc1d14	Distal	chr5	36833257	36835763	0.62	0.77	0.92	0.89	0.75	0.91	0.83	0.93	0.81	0.74	0.69	0.87	0.810833	-0.24	-0.54	-0.84	-0.78	-0.5	-0.82	-0.66	-0.86	-0.62	-0.48	-0.38	-0.74	-0.621667	0.0198004	0.525277	20.1924	19.1102	-0.636828	0.183983	0.183983	1.347	1.639	1.873	1.845	2.481	2.239	2.113	2.792	2.581	2.29
Tbc1d14:36835763.2	Tbc1d14:36835763	Tbc1d14	Proximal	chr5	36835391	36835763	0.38	0.23	0.08	0.11	0.25	0.09	0.17	0.07	0.19	0.26	0.31	0.13	0.189167	-0.24	-0.54	-0.84	-0.78	-0.5	-0.82	-0.66	-0.86	-0.62	-0.48	-0.38	-0.74	-0.621667	0.0198004	0.525277	20.1924	19.1102	-0.636828	0.183983	0.183983	1.347	1.639	1.873	1.845	2.481	2.239	2.113	2.792	2.581	2.29
Tbcel:42224232.1	Tbcel:42224232	Tbcel	Distal	chr9	42220399	42224232	0.42	0.61	0.66	0.24	0.09	0.6	0.8	0.81	0.82	0.31	0.32	0.67	0.529167	-0.3	-0.37	-0.42	0.39	0.57	-0.35	-0.72	-0.73	-0.78	0.2	0.14	-0.51	-0.24	0.00757455	0.371887	23.2289	15.4549	-0.235874	0.621078	0.621078	2.528	3.177	7.273	4.477	4.11	6.096	7.384	7.93	12.094	5.923
Tbcel:42224232.2	Tbcel:42224232	Tbcel	Proximal	chr9	42220471	42224232	0.12	0.24	0.24	0.63	0.66	0.25	0.08	0.08	0.04	0.51	0.46	0.16	0.289167	-0.3	-0.37	-0.42	0.39	0.57	-0.35	-0.72	-0.73	-0.78	0.2	0.14	-0.51	-0.24	0.00757455	0.371887	23.2289	15.4549	-0.235874	0.621078	0.621078	2.528	3.177	7.273	4.477	4.11	6.096	7.384	7.93	12.094	5.923
Tcea1:4886437.3	Tcea1:4886437	Tcea1	Distal	chr1	4886437	4888866	0.7	0.74	0.53	0.5	0.55	0.69	0.86	0.73	0.67	0.68	0.72	0.66	0.669167	-0.41	-0.51	-0.11	-0.01	-0.15	-0.41	-0.75	-0.5	-0.38	-0.38	-0.46	-0.36	-0.369167	0.0449358	0.79412	25.7369	12.2145	-0.38133	0.227999	0.227999	1.071	1.213	1.919	2.073	2.153	2.705	2.98	3.628	4.164	3.912
Tcea1:4886437.4	Tcea1:4886437	Tcea1	Proximal	chr1	4886437	4886842	0.29	0.23	0.42	0.49	0.4	0.28	0.11	0.23	0.29	0.3	0.26	0.3	0.3	-0.41	-0.51	-0.11	-0.01	-0.15	-0.41	-0.75	-0.5	-0.38	-0.38	-0.46	-0.36	-0.369167	0.0449358	0.79412	25.7369	12.2145	-0.38133	0.227999	0.227999	1.071	1.213	1.919	2.073	2.153	2.705	2.98	3.628	4.164	3.912
Tet3:83319819.1	Tet3:83319819	Tet3	Distal	chr6	83312367	83319819	0.48	0.44	0.45	0.39	0.42	0.37	0.57	0.8	0.54	0.47	0.44	0.38	0.479167	-0.04	0.01	0.04	0.04	0.11	0.1	-0.16	-0.62	-0.11	0.03	0.04	0.12	-0.0366667	0.0289916	0.631697	26.6667	15.794	-0.034285	0.203752	0.203752	0.74	0.74	1.205	0.976	1.044	1.704	1.354	2.035	2.362	1.9
Tet3:83319819.2	Tet3:83319819	Tet3	Proximal	chr6	83312414	83319819	0.44	0.45	0.49	0.43	0.53	0.47	0.41	0.18	0.43	0.5	0.48	0.5	0.4425	-0.04	0.01	0.04	0.04	0.11	0.1	-0.16	-0.62	-0.11	0.03	0.04	0.12	-0.0366667	0.0289916	0.631697	26.6667	15.794	-0.034285	0.203752	0.203752	0.74	0.74	1.205	0.976	1.044	1.704	1.354	2.035	2.362	1.9
Tgfa:86221942.1	Tgfa:86221942	Tgfa	Distal	chr6	86221942	86225713	0.4	0.47	0.56	0.21	0.33	0.46	0.54	0.7	0.64	0.32	0.42	0.27	0.443333	-0.01	-0.17	-0.23	0.13	0.16	-0.07	-0.23	-0.57	-0.4	-0.05	-0.09	0.16	-0.114167	0.0301283	0.643975	25.6101	16.2919	-0.110988	0.275475	0.275475	#N/A	#N/A	#N/A	#N/A	#N/A	#N/A	#N/A	#N/A	#N/A	#N/A
Tgfa:86221942.2	Tgfa:86221942	Tgfa	Proximal	chr6	86221942	86225636	0.39	0.3	0.33	0.34	0.49	0.39	0.31	0.13	0.24	0.27	0.33	0.43	0.329167	-0.01	-0.17	-0.23	0.13	0.16	-0.07	-0.23	-0.57	-0.4	-0.05	-0.09	0.16	-0.114167	0.0301283	0.643975	25.6101	16.2919	-0.110988	0.275475	0.275475	#N/A	#N/A	#N/A	#N/A	#N/A	#N/A	#N/A	#N/A	#N/A	#N/A
Tgfbr2:115999675.1	Tgfbr2:115999675	Tgfbr2	Distal	chr9	115996813	115999675	0.76	0.87	0.73	0.75	0.32	0.21	0.93	0.87	0.92	0.87	0.67	0.69	0.715833	-0.58	-0.79	-0.49	-0.53	0.01	0.54	-0.88	-0.77	-0.87	-0.76	-0.43	-0.41	-0.496667	0.0299381	0.643975	27.9074	17.5331	-0.461204	0.448846	0.448846	1	1.202	2.166	1.941	1.565	1.782	2.122	2.223	3.333	3.121
Tgfbr2:115999675.2	Tgfbr2:115999675	Tgfbr2	Proximal	chr9	115996878	115999675	0.18	0.08	0.24	0.22	0.33	0.75	0.05	0.1	0.05	0.11	0.24	0.28	0.219167	-0.58	-0.79	-0.49	-0.53	0.01	0.54	-0.88	-0.77	-0.87	-0.76	-0.43	-0.41	-0.496667	0.0299381	0.643975	27.9074	17.5331	-0.461204	0.448846	0.448846	1	1.202	2.166	1.941	1.565	1.782	2.122	2.223	3.333	3.121
Thoc3:54561598.2	Thoc3:54561598	Thoc3	Distal	chr13	54560198	54561598	0.55	0.66	0.64	0.46	0.52	0.51	0.64	0.47	0.47	0.39	0.52	0.62	0.5375	-0.43	-0.61	-0.53	-0.3	-0.36	-0.43	-0.56	-0.3	-0.31	-0.22	-0.41	-0.53	-0.415833	0.0187475	0.522776	20.809	14.3567	-0.405058	0.133034	0.133034	3.045	3.655	4.362	3.994	5.053	4.4	5.425	5.937	7.222	5.137
Thoc3:54561598.6	Thoc3:54561598	Thoc3	Proximal	chr13	54561219	54561598	0.12	0.05	0.11	0.16	0.16	0.08	0.08	0.17	0.16	0.17	0.11	0.09	0.121667	-0.43	-0.61	-0.53	-0.3	-0.36	-0.43	-0.56	-0.3	-0.31	-0.22	-0.41	-0.53	-0.415833	0.0187475	0.522776	20.809	14.3567	-0.405058	0.133034	0.133034	3.045	3.655	4.362	3.994	5.053	4.4	5.425	5.937	7.222	5.137
Tlk1:70552222.1	Tlk1:70552222	Tlk1	Distal	chr2	70550470	70552222	0.41	0.47	0.73	0.75	0.53	0.49	0.42	0.51	0.6	0.63	0.64	0.57	0.5625	-0.33	-0.36	-0.67	-0.68	-0.31	-0.28	-0.16	-0.44	-0.52	-0.46	-0.55	-0.41	-0.430833	0.00164734	0.150809	27.0627	22.6006	-0.408027	0.189633	0.189633	1.543	1.88	3.214	3.83	3.809	4.664	4.855	5.061	6.583	6.122
Tlk1:70552222.6	Tlk1:70552222	Tlk1	Proximal	chr2	70551754	70552222	0.08	0.11	0.06	0.07	0.22	0.21	0.26	0.07	0.08	0.17	0.09	0.16	0.131667	-0.33	-0.36	-0.67	-0.68	-0.31	-0.28	-0.16	-0.44	-0.52	-0.46	-0.55	-0.41	-0.430833	0.00164734	0.150809	27.0627	22.6006	-0.408027	0.189633	0.189633	1.543	1.88	3.214	3.83	3.809	4.664	4.855	5.061	6.583	6.122
Tln2:67069325.1	Tln2:67069325	Tln2	Distal	chr9	67064896	67069325	0	0.11	0.23	0.41	0.31	0.45	0.16	0.14	0.39	0.33	0.31	0.41	0.270833	0	0.28	0.02	-0.29	-0.2	-0.36	0.22	0.3	-0.06	-0.2	-0.08	-0.26	-0.0525	0.0198269	0.525277	23.9182	4.63868	-0.0523614	0.256856	0.256856	#N/A	#N/A	#N/A	#N/A	#N/A	#N/A	#N/A	#N/A	#N/A	#N/A
Tln2:67069325.4	Tln2:67069325	Tln2	Proximal	chr9	67068716	67069325	0	0.39	0.25	0.12	0.11	0.09	0.38	0.44	0.33	0.13	0.23	0.15	0.218333	0	0.28	0.02	-0.29	-0.2	-0.36	0.22	0.3	-0.06	-0.2	-0.08	-0.26	-0.0525	0.0198269	0.525277	23.9182	4.63868	-0.0523614	0.256856	0.256856	#N/A	#N/A	#N/A	#N/A	#N/A	#N/A	#N/A	#N/A	#N/A	#N/A
Tm4sf4:57244996.1	Tm4sf4:57244996	Tm4sf4	Distal	chr3	57244996	57245599	0.41	0.72	0.84	0.74	0.45	0.43	0.73	0.86	0.87	0.74	0.77	0.78	0.695	-0.14	-0.59	-0.78	-0.63	-0.18	0.03	-0.59	-0.8	-0.84	-0.67	-0.63	-0.66	-0.54	0.00536105	0.327273	20.891	19.4743	-0.566168	0.304572	0.304572	6.402	4.562	6.308	4.211	5.86	9.289	17.262	20.712	19.64	12.465
Tm4sf4:57244996.2	Tm4sf4:57244996	Tm4sf4	Proximal	chr3	57244996	57245483	0.27	0.13	0.06	0.11	0.27	0.46	0.14	0.06	0.03	0.07	0.14	0.12	0.155	-0.14	-0.59	-0.78	-0.63	-0.18	0.03	-0.59	-0.8	-0.84	-0.67	-0.63	-0.66	-0.54	0.00536105	0.327273	20.891	19.4743	-0.566168	0.304572	0.304572	6.402	4.562	6.308	4.211	5.86	9.289	17.262	20.712	19.64	12.465
Tmed4:6171803.3	Tmed4:6171803	Tmed4	Distal	chr11	6170372	6171803	0.05	0.05	0.07	0.15	0.14	0.1	0.15	0.07	0.04	0.15	0.14	0.24	0.1125	0.58	0.64	0.69	0.34	0.34	0.48	0.56	0.71	0.59	0.55	0.55	0.1	0.510833	0.00926706	0.382196	26.5105	4.49878	0.501217	0.17566	0.17566	12.977	16.43	15.997	16.437	18.738	20.293	30.043	34.83	31.277	39.071
Tmed4:6171803.4	Tmed4:6171803	Tmed4	Proximal	chr11	6170717	6171803	0.63	0.69	0.76	0.49	0.48	0.58	0.71	0.78	0.63	0.7	0.69	0.34	0.623333	0.58	0.64	0.69	0.34	0.34	0.48	0.56	0.71	0.59	0.55	0.55	0.1	0.510833	0.00926706	0.382196	26.5105	4.49878	0.501217	0.17566	0.17566	12.977	16.43	15.997	16.437	18.738	20.293	30.043	34.83	31.277	39.071
Tmem126b:97617671.6	Tmem126b:97617671	Tmem126b	Distal	chr7	97616107	97617671	0.48	0.3	0.19	0.17	0.57	0.38	0.46	0.35	0.21	0.15	0.31	0.49	0.338333	-0.28	-0.08	0.43	0.36	-0.32	-0.06	-0.12	0.11	0.4	0.09	0.05	-0.35	0.0191667	0.000585219	0.0876154	23.2138	9.45419	0.0295111	0.312912	0.312912	7.696	5.052	8.832	10.403	8.413	9.794	13.279	14.013	15.233	12.306
Tmem126b:97617671.7	Tmem126b:97617671	Tmem126b	Proximal	chr7	97617333	97617671	0.2	0.22	0.62	0.53	0.25	0.32	0.34	0.46	0.61	0.24	0.36	0.14	0.3575	-0.28	-0.08	0.43	0.36	-0.32	-0.06	-0.12	0.11	0.4	0.09	0.05	-0.35	0.0191667	0.000585219	0.0876154	23.2138	9.45419	0.0295111	0.312912	0.312912	7.696	5.052	8.832	10.403	8.413	9.794	13.279	14.013	15.233	12.306
Tmem167:90243980.1	Tmem167:90243980	Tmem167	Distal	chr13	90243980	90247489	0.07	0.07	0.05	0.12	0.03	0.1	0.14	0.15	0.18	0.22	0.14	0.12	0.115833	0.19	0.15	0.1	0.06	0.27	0.2	0.2	0.05	0.05	-0.09	0.18	0.24	0.133333	0.0100488	0.400567	24.2794	20.7802	0.134636	0.112602	0.112602	13.902	11.624	10.803	14.223	13.995	16.613	23.979	22.04	23.689	28.732
Tmem167:90243980.14	Tmem167:90243980	Tmem167	Proximal	chr13	90243980	90244307	0.26	0.22	0.15	0.18	0.3	0.3	0.34	0.2	0.23	0.13	0.32	0.36	0.249167	0.19	0.15	0.1	0.06	0.27	0.2	0.2	0.05	0.05	-0.09	0.18	0.24	0.133333	0.0100488	0.400567	24.2794	20.7802	0.134636	0.112602	0.112602	13.902	11.624	10.803	14.223	13.995	16.613	23.979	22.04	23.689	28.732
Tmem176a:48795103.1	Tmem176a:48795103	Tmem176a	Distal	chr6	48795103	48797096	0.26	0.29	0.3	0.52	0.49	0.49	0.27	0.32	0.42	0.73	0.37	0.27	0.394167	0.21	-0.05	-0.01	-0.44	-0.14	-0.31	0.34	0.24	-0.03	-0.65	-0.01	0.29	-0.0466667	0.0169183	0.485726	22.5674	2.79417	-0.0592783	0.347268	0.347268	48.618	37.698	36.822	29.628	43.033	42.027	53.342	56.636	44.014	30.057
Tmem176a:48795103.6	Tmem176a:48795103	Tmem176a	Proximal	chr6	48795103	48795364	0.47	0.24	0.29	0.08	0.35	0.18	0.61	0.56	0.39	0.08	0.36	0.56	0.3475	0.21	-0.05	-0.01	-0.44	-0.14	-0.31	0.34	0.24	-0.03	-0.65	-0.01	0.29	-0.0466667	0.0169183	0.485726	22.5674	2.79417	-0.0592783	0.347268	0.347268	48.618	37.698	36.822	29.628	43.033	42.027	53.342	56.636	44.014	30.057
Tnfaip2:112691632.1	Tnfaip2:112691632	Tnfaip2	Distal	chr12	112691632	112693229	0.5	0.8	0.71	0.52	0.45	0.55	0.85	0.81	0.72	0.71	0.61	0.8	0.669167	-0.28	-0.67	-0.59	-0.22	-0.31	-0.36	-0.76	-0.68	-0.56	-0.52	-0.35	-0.7	-0.5	0.0125963	0.440637	20.1439	16.0013	-0.491898	0.205777	0.205777	6.795	6.729	3.585	2.425	5.58	6.611	12.474	9.044	3.811	3.147
Tnfaip2:112691632.3	Tnfaip2:112691632	Tnfaip2	Proximal	chr12	112691632	112691779	0.22	0.13	0.12	0.3	0.14	0.19	0.09	0.13	0.16	0.19	0.26	0.1	0.169167	-0.28	-0.67	-0.59	-0.22	-0.31	-0.36	-0.76	-0.68	-0.56	-0.52	-0.35	-0.7	-0.5	0.0125963	0.440637	20.1439	16.0013	-0.491898	0.205777	0.205777	6.795	6.729	3.585	2.425	5.58	6.611	12.474	9.044	3.811	3.147
Tnpo3:29491866.2	Tnpo3:29491866	Tnpo3	Distal	chr6	29491082	29491866	0.49	0.59	0.5	0.15	0.33	0.29	0.3	0.58	0.76	0.76	0.41	0.41	0.464167	-0.16	-0.4	-0.31	0.42	0.03	0.34	-0.1	-0.5	-0.69	-0.61	-0.14	-0.21	-0.194167	0.0350031	0.693419	26.6667	18.1393	-0.167323	0.405201	0.405201	3.094	3.429	4.494	6.171	5.716	6.936	5.957	6.311	7.507	7.077
Tnpo3:29491866.3	Tnpo3:29491866	Tnpo3	Proximal	chr6	29491128	29491866	0.33	0.19	0.19	0.57	0.36	0.63	0.2	0.08	0.07	0.15	0.27	0.2	0.27	-0.16	-0.4	-0.31	0.42	0.03	0.34	-0.1	-0.5	-0.69	-0.61	-0.14	-0.21	-0.194167	0.0350031	0.693419	26.6667	18.1393	-0.167323	0.405201	0.405201	3.094	3.429	4.494	6.171	5.716	6.936	5.957	6.311	7.507	7.077
Tob1:94074800.1	Tob1:94074800	Tob1	Distal	chr11	94074800	94076835	0.18	0.2	0.1	0.15	0.14	0.1	0.35	0.13	0.18	0.08	0.15	0.13	0.1575	0.22	0.45	0.51	0.63	0.59	0.52	0.2	0.69	0.6	0.65	0.64	0.42	0.51	0.0202954	0.525277	23.453	12.6481	0.512928	0.152725	0.152725	30.782	34.884	44.382	87.184	55.609	66.875	69.335	91.982	129.201	145.129
Tob1:94074800.2	Tob1:94074800	Tob1	Proximal	chr11	94074800	94076809	0.4	0.65	0.61	0.78	0.73	0.62	0.55	0.82	0.78	0.73	0.79	0.55	0.6675	0.22	0.45	0.51	0.63	0.59	0.52	0.2	0.69	0.6	0.65	0.64	0.42	0.51	0.0202954	0.525277	23.453	12.6481	0.512928	0.152725	0.152725	30.782	34.884	44.382	87.184	55.609	66.875	69.335	91.982	129.201	145.129
Top2b:17262813.1	Top2b:17262813	Top2b	Distal	chr14	17262813	17263301	0.73	0.73	0.64	0.49	0.28	0.7	0.97	0.9	0.89	0.81	0.57	0.69	0.7	-0.46	-0.46	-0.28	0.02	0.44	-0.4	-0.94	-0.8	-0.78	-0.62	-0.14	-0.38	-0.4	0.0155088	0.484285	26.6667	14.801	-0.406437	0.476935	0.476935	3.91	4.154	5.379	5.918	5.653	7.691	10.667	11.5	12.728	11.202
Top2b:17262813.2	Top2b:17262813	Top2b	Proximal	chr14	17262813	17263168	0.27	0.27	0.36	0.51	0.72	0.3	0.03	0.1	0.11	0.19	0.43	0.31	0.3	-0.46	-0.46	-0.28	0.02	0.44	-0.4	-0.94	-0.8	-0.78	-0.62	-0.14	-0.38	-0.4	0.0155088	0.484285	26.6667	14.801	-0.406437	0.476935	0.476935	3.91	4.154	5.379	5.918	5.653	7.691	10.667	11.5	12.728	11.202
Tpd52:8931174.6	Tpd52:8931174	Tpd52	Distal	chr3	8929434	8931174	0.11	0.23	0.34	0.18	0.11	0.26	0.44	0.44	0.46	0.09	0.17	0.37	0.266667	0.54	0.22	0.11	0.16	0.57	0.09	-0.1	-0.24	-0.22	0.43	0.37	-0.05	0.156667	0.0197181	0.525277	20.1924	17.003	0.156031	0.301843	0.301843	0.999	0.89	1.27	1.267	1.387	1.512	2.692	2.885	3.122	1.946
Tpd52:8931174.7	Tpd52:8931174	Tpd52	Proximal	chr3	8929597	8931174	0.65	0.45	0.45	0.34	0.68	0.35	0.34	0.2	0.24	0.52	0.54	0.32	0.423333	0.54	0.22	0.11	0.16	0.57	0.09	-0.1	-0.24	-0.22	0.43	0.37	-0.05	0.156667	0.0197181	0.525277	20.1924	17.003	0.156031	0.301843	0.301843	0.999	0.89	1.27	1.267	1.387	1.512	2.692	2.885	3.122	1.946
Tpp1:112895286.1	Tpp1:112895286	Tpp1	Distal	chr7	112893526	112895286	0.25	0.3	0.31	0.35	0.57	0.39	0.29	0.28	0.38	0.34	0.53	0.27	0.355	0.03	0.22	-0.04	-0.18	-0.46	0.02	-0.09	0.33	-0.21	-0.11	-0.45	0.26	-0.0566667	0.031981	0.668844	22.4409	4.7378	-0.0588988	0.279224	0.279224	9.209	10.918	13.38	14.712	18.929	21.272	37.261	35.802	37.144	30.885
Tpp1:112895286.3	Tpp1:112895286	Tpp1	Proximal	chr7	112894598	112895286	0.28	0.52	0.27	0.17	0.11	0.41	0.2	0.61	0.17	0.23	0.08	0.53	0.298333	0.03	0.22	-0.04	-0.18	-0.46	0.02	-0.09	0.33	-0.21	-0.11	-0.45	0.26	-0.0566667	0.031981	0.668844	22.4409	4.7378	-0.0588988	0.279224	0.279224	9.209	10.918	13.38	14.712	18.929	21.272	37.261	35.802	37.144	30.885
Trim35:66927572.1	Trim35:66927572	Trim35	Distal	chr14	66927572	66930257	0.39	0.28	0.4	0.23	0.2	0.23	0.64	0.46	0.36	0.37	0.37	0.59	0.376667	0.04	-0.02	-0.19	0.02	0.05	0.05	-0.44	-0.1	0.05	0.04	-0.07	-0.44	-0.0841667	0.00755422	0.371887	20.2639	15.4884	-0.0733444	0.190071	0.190071	1.458	2.116	1.296	1.313	1.805	1.79	1.639	2.55	2.267	1.688
Trim35:66927572.2	Trim35:66927572	Trim35	Proximal	chr14	66927572	66930228	0.43	0.26	0.21	0.25	0.25	0.28	0.2	0.36	0.41	0.41	0.3	0.15	0.2925	0.04	-0.02	-0.19	0.02	0.05	0.05	-0.44	-0.1	0.05	0.04	-0.07	-0.44	-0.0841667	0.00755422	0.371887	20.2639	15.4884	-0.0733444	0.190071	0.190071	1.458	2.116	1.296	1.313	1.805	1.79	1.639	2.55	2.267	1.688
Trub1:57562499.3	Trub1:57562499	Trub1	Distal	chr19	57562499	57563504	0.25	0.19	0.2	0.1	0.13	0.12	0.23	0.17	0.21	0.22	0.29	0.28	0.199167	0.05	0.18	0.2	0.02	0.1	0.04	0.12	0.18	0.27	0.31	0.11	-0.02	0.13	0.0130255	0.447419	25.2985	7.50034	0.124325	0.114261	0.114261	0.702	0.734	0.909	1.311	1.033	1.301	1.558	2.111	1.868	2.697
Trub1:57562499.4	Trub1:57562499	Trub1	Proximal	chr19	57562499	57563400	0.3	0.37	0.4	0.12	0.23	0.16	0.35	0.35	0.48	0.53	0.4	0.26	0.329167	0.05	0.18	0.2	0.02	0.1	0.04	0.12	0.18	0.27	0.31	0.11	-0.02	0.13	0.0130255	0.447419	25.2985	7.50034	0.124325	0.114261	0.114261	0.702	0.734	0.909	1.311	1.033	1.301	1.558	2.111	1.868	2.697
Tsc22d1:76906224.1	Tsc22d1:76906224	Tsc22d1	Distal	chr14	76906224	76907620	0.05	0.11	0.06	0.18	0.07	0.06	0.13	0.06	0.31	0.24	0.06	0.06	0.115833	0.72	0.42	0.52	0.48	0.49	0.66	0.69	0.7	0.28	0.37	0.72	0.77	0.568333	0.0190844	0.52315	23.6998	22.5034	0.566135	0.169309	0.169309	68.281	86.881	50.556	69.146	44.142	66.759	185.317	127.377	110.634	76.155
Tsc22d1:76906224.2	Tsc22d1:76906224	Tsc22d1	Proximal	chr14	76906224	76907566	0.77	0.53	0.58	0.66	0.56	0.72	0.82	0.76	0.59	0.61	0.78	0.83	0.684167	0.72	0.42	0.52	0.48	0.49	0.66	0.69	0.7	0.28	0.37	0.72	0.77	0.568333	0.0190844	0.52315	23.6998	22.5034	0.566135	0.169309	0.169309	68.281	86.881	50.556	69.146	44.142	66.759	185.317	127.377	110.634	76.155
Ttpal:163441099.1	Ttpal:163441099	Ttpal	Distal	chr2	163441099	163444749	0.63	0.68	0.71	0.68	0.59	0.66	0.78	0.91	0.68	0.75	0.65	0.85	0.714167	-0.49	-0.58	-0.64	-0.56	-0.33	-0.54	-0.69	-0.88	-0.57	-0.67	-0.5	-0.8	-0.604167	0.0125518	0.440637	20.1573	16.8354	-0.60338	0.151523	0.151523	6.941	8.322	7.791	13.118	11.655	9.476	11.463	12.077	12.106	13.945
Ttpal:163441099.2	Ttpal:163441099	Ttpal	Proximal	chr2	163441099	163442933	0.14	0.1	0.07	0.12	0.26	0.12	0.09	0.03	0.11	0.08	0.15	0.05	0.11	-0.49	-0.58	-0.64	-0.56	-0.33	-0.54	-0.69	-0.88	-0.57	-0.67	-0.5	-0.8	-0.604167	0.0125518	0.440637	20.1573	16.8354	-0.60338	0.151523	0.151523	6.941	8.322	7.791	13.118	11.655	9.476	11.463	12.077	12.106	13.945
Ubqln4:88372003.1	Ubqln4:88372003	Ubqln4	Distal	chr3	88372003	88373647	0.66	0.81	0.86	0.87	0.67	0.79	0.86	0.85	0.84	0.83	0.81	0.81	0.805	-0.43	-0.71	-0.79	-0.77	-0.46	-0.66	-0.78	-0.77	-0.75	-0.74	-0.67	-0.68	-0.684167	0.0169161	0.485726	20.3739	18.2909	-0.690659	0.121011	0.121011	1.543	1.567	1.956	2.429	3.337	3.17	3.365	3.946	3.744	2.949
Ubqln4:88372003.2	Ubqln4:88372003	Ubqln4	Proximal	chr3	88372003	88373093	0.23	0.1	0.07	0.1	0.21	0.13	0.08	0.08	0.09	0.09	0.14	0.13	0.120833	-0.43	-0.71	-0.79	-0.77	-0.46	-0.66	-0.78	-0.77	-0.75	-0.74	-0.67	-0.68	-0.684167	0.0169161	0.485726	20.3739	18.2909	-0.690659	0.121011	0.121011	1.543	1.567	1.956	2.429	3.337	3.17	3.365	3.946	3.744	2.949
Ugt2b38:87839512.1	Ugt2b38:87839512	Ugt2b38	Distal	chr5	87838969	87839512	0.46	0.11	0.6	0.79	0.76	0.28	0.08	0.06	0.51	0.56	0.17	0.22	0.383333	0.08	0.78	-0.2	-0.58	-0.52	0.44	0.84	0.88	-0.02	-0.12	0.66	0.56	0.233333	0.00546428	0.327273	20.9779	3.51214	0.18153	0.606693	0.606693	2.251	2.94	3.97	4.476	3.088	3.058	6.369	7.646	9.154	6.329
Ugt2b38:87839512.2	Ugt2b38:87839512	Ugt2b38	Proximal	chr5	87839079	87839512	0.54	0.89	0.4	0.21	0.24	0.72	0.92	0.94	0.49	0.44	0.83	0.78	0.616667	0.08	0.78	-0.2	-0.58	-0.52	0.44	0.84	0.88	-0.02	-0.12	0.66	0.56	0.233333	0.00546428	0.327273	20.9779	3.51214	0.18153	0.606693	0.606693	2.251	2.94	3.97	4.476	3.088	3.058	6.369	7.646	9.154	6.329
Usp25:77115635.1	Usp25:77115635	Usp25	Distal	chr16	77115635	77117028	0.5	0.21	0.28	0.13	0.37	0.41	0.49	0.38	0.34	0.27	0.52	0.44	0.361667	-0.22	0.18	0.2	0.1	-0.27	-0.23	-0.3	-0.15	-0.16	0.02	-0.27	-0.26	-0.113333	0.0126233	0.440637	26.1185	8.79344	-0.130366	0.194009	0.194009	1.399	1.57	2.802	3.292	2.78	3.448	3.794	4.794	5.47	5.679
Usp25:77115635.2	Usp25:77115635	Usp25	Proximal	chr16	77115635	77116994	0.28	0.39	0.48	0.23	0.1	0.18	0.19	0.23	0.18	0.29	0.25	0.18	0.248333	-0.22	0.18	0.2	0.1	-0.27	-0.23	-0.3	-0.15	-0.16	0.02	-0.27	-0.26	-0.113333	0.0126233	0.440637	26.1185	8.79344	-0.130366	0.194009	0.194009	1.399	1.57	2.802	3.292	2.78	3.448	3.794	4.794	5.47	5.679
Vezf1:87894900.1	Vezf1:87894900	Vezf1	Distal	chr11	87894900	87898229	0.22	0.1	0.16	0.29	0.14	0.25	0.41	0.27	0.33	0.11	0.21	0.36	0.2375	0.04	0.26	0.29	-0.01	-0.02	-0.05	-0.2	-0.03	-0.05	0.35	0.21	-0.12	0.0558333	0.0110066	0.410799	27.6577	7.01517	0.0295782	0.193869	0.193869	3.052	2.789	3.868	5.096	5.333	4.845	5.785	7.253	7.644	5.825
Vezf1:87894900.3	Vezf1:87894900	Vezf1	Proximal	chr11	87894900	87897230	0.26	0.36	0.45	0.28	0.12	0.2	0.21	0.24	0.28	0.46	0.42	0.24	0.293333	0.04	0.26	0.29	-0.01	-0.02	-0.05	-0.2	-0.03	-0.05	0.35	0.21	-0.12	0.0558333	0.0110066	0.410799	27.6577	7.01517	0.0295782	0.193869	0.193869	3.052	2.789	3.868	5.096	5.333	4.845	5.785	7.253	7.644	5.825
Vezt:93433449.1	Vezt:93433449	Vezt	Distal	chr10	93424267	93433449	0.36	0.23	0.15	0.1	0.3	0.42	0.21	0.26	0.11	0.05	0.27	0.25	0.225833	0	0.12	0.31	0.49	-0.04	-0.13	0.23	0.3	0.54	0.58	0.14	0.32	0.238333	0.0398242	0.748942	22.0835	10.7052	0.255457	0.214024	0.214024	1.359	1.449	1.773	1.994	1.808	2.324	2.395	2.958	2.833	1.862
Vezt:93433449.4	Vezt:93433449	Vezt	Proximal	chr10	93432431	93433449	0.36	0.35	0.46	0.59	0.26	0.29	0.44	0.56	0.65	0.63	0.41	0.57	0.464167	0	0.12	0.31	0.49	-0.04	-0.13	0.23	0.3	0.54	0.58	0.14	0.32	0.238333	0.0398242	0.748942	22.0835	10.7052	0.255457	0.214024	0.214024	1.359	1.449	1.773	1.994	1.808	2.324	2.395	2.958	2.833	1.862
Vps26a:61919606.3	Vps26a:61919606	Vps26a	Distal	chr10	61918015	61919606	0.29	0.5	0.33	0.38	0.19	0.44	0.6	0.48	0.5	0.27	0.42	0.56	0.413333	0.11	-0.41	0.06	-0.01	0.17	-0.2	-0.48	-0.26	-0.32	0.13	-0.23	-0.49	-0.160833	0.00768665	0.371887	20.5261	15.2417	-0.145577	0.252035	0.252035	4.316	3.77	5.979	7.279	5.332	7.018	8.284	9.469	10.06	9.184
Vps26a:61919606.4	Vps26a:61919606	Vps26a	Proximal	chr10	61918718	61919606	0.4	0.09	0.39	0.37	0.36	0.24	0.12	0.22	0.18	0.4	0.19	0.07	0.2525	0.11	-0.41	0.06	-0.01	0.17	-0.2	-0.48	-0.26	-0.32	0.13	-0.23	-0.49	-0.160833	0.00768665	0.371887	20.5261	15.2417	-0.145577	0.252035	0.252035	4.316	3.77	5.979	7.279	5.332	7.018	8.284	9.469	10.06	9.184
Wdr18:79430216.1	Wdr18:79430216	Wdr18	Distal	chr10	79430216	79431992	0.59	0.45	0.62	0.72	0.84	0.52	0.53	0.32	0.78	0.78	0.54	0.36	0.5875	-0.18	0.1	-0.24	-0.44	-0.68	-0.04	-0.06	0.36	-0.56	-0.56	-0.08	0.28	-0.175	0.000287019	0.0664401	20.2393	4.7654	-0.206781	0.405009	0.405009	4.028	3.468	4.652	5.883	7.463	5.974	5.491	4.215	6.943	5.039
Wdr18:79430216.2	Wdr18:79430216	Wdr18	Proximal	chr10	79430216	79430437	0.41	0.55	0.38	0.28	0.16	0.48	0.47	0.68	0.22	0.22	0.46	0.64	0.4125	-0.18	0.1	-0.24	-0.44	-0.68	-0.04	-0.06	0.36	-0.56	-0.56	-0.08	0.28	-0.175	0.000287019	0.0664401	20.2393	4.7654	-0.206781	0.405009	0.405009	4.028	3.468	4.652	5.883	7.463	5.974	5.491	4.215	6.943	5.039
Wdr5:27390277.1	Wdr5:27390277	Wdr5	Distal	chr2	27390277	27392055	0.38	0.46	0.48	0.25	0.24	0.48	0.31	0.44	0.42	0.26	0.27	0.37	0.363333	-0.11	-0.28	-0.24	0.04	0.19	-0.21	-0.18	-0.33	-0.19	-0.13	0.05	-0.25	-0.136667	0.0103494	0.403971	22.8112	16.4742	-0.137152	0.194572	0.194572	3.214	3.301	4.797	4.586	3.393	4.375	3.916	4.241	6.28	5.324
Wdr5:27390277.3	Wdr5:27390277	Wdr5	Proximal	chr2	27390277	27390902	0.27	0.18	0.24	0.29	0.43	0.27	0.13	0.11	0.23	0.13	0.32	0.12	0.226667	-0.11	-0.28	-0.24	0.04	0.19	-0.21	-0.18	-0.33	-0.19	-0.13	0.05	-0.25	-0.136667	0.0103494	0.403971	22.8112	16.4742	-0.137152	0.194572	0.194572	3.214	3.301	4.797	4.586	3.393	4.375	3.916	4.241	6.28	5.324
Wdr73:88036795.1	Wdr73:88036795	Wdr73	Distal	chr7	88035609	88036795	0.03	0.05	0.25	0.1	0.44	0.12	0.08	0.05	0.35	0.39	0.67	0.39	0.243333	0.94	0.9	0.5	0.8	0.12	0.76	0.84	0.9	0.3	0.22	-0.34	0.22	0.513333	0.0137411	0.457981	26.8508	26.3943	0.531458	0.307158	0.307158	3.708	3.399	3.096	3.585	3.047	3.121	3.58	3.788	2.841	4.016
Wdr73:88036795.2	Wdr73:88036795	Wdr73	Proximal	chr7	88036149	88036795	0.97	0.95	0.75	0.9	0.56	0.88	0.92	0.95	0.65	0.61	0.33	0.61	0.756667	0.94	0.9	0.5	0.8	0.12	0.76	0.84	0.9	0.3	0.22	-0.34	0.22	0.513333	0.0137411	0.457981	26.8508	26.3943	0.531458	0.307158	0.307158	3.708	3.399	3.096	3.585	3.047	3.121	3.58	3.788	2.841	4.016
Wipf1:73270522.1	Wipf1:73270522	Wipf1	Distal	chr2	73267674	73270522	0.48	0.54	0.46	0.4	0.58	0.56	0.72	0.7	0.5	0.35	0.51	0.56	0.53	-0.34	-0.38	-0.26	-0.02	-0.38	-0.41	-0.63	-0.6	-0.44	0	-0.37	-0.43	-0.355	0.0182041	0.510557	26.8737	10.2866	-0.377951	0.216797	0.216797	0.797	0.901	1.166	1.19	1.368	1.633	1.749	1.757	2.402	1.401
Wipf1:73270522.2	Wipf1:73270522	Wipf1	Proximal	chr2	73268073	73270522	0.14	0.16	0.2	0.38	0.2	0.15	0.09	0.1	0.06	0.35	0.14	0.13	0.175	-0.34	-0.38	-0.26	-0.02	-0.38	-0.41	-0.63	-0.6	-0.44	0	-0.37	-0.43	-0.355	0.0182041	0.510557	26.8737	10.2866	-0.377951	0.216797	0.216797	0.797	0.901	1.166	1.19	1.368	1.633	1.749	1.757	2.402	1.401
Zbtb4:69590974.1	Zbtb4:69590974	Zbtb4	Distal	chr11	69590974	69596227	0.34	0.58	0.69	0.65	0.64	0.49	0.23	0.2	0.57	0.71	0.55	0.3	0.495833	0.16	-0.3	-0.5	-0.39	-0.43	-0.12	0.39	0.44	-0.34	-0.54	-0.3	0.25	-0.14	0.000614045	0.0876278	26.0536	24.2756	-0.107165	0.450747	0.450747	1.863	1.761	2.446	2.717	2.312	2.714	2.909	3.636	3.515	2.837
Zbtb4:69590974.2	Zbtb4:69590974	Zbtb4	Proximal	chr11	69590974	69595452	0.5	0.28	0.19	0.26	0.21	0.37	0.62	0.64	0.23	0.17	0.25	0.55	0.355833	0.16	-0.3	-0.5	-0.39	-0.43	-0.12	0.39	0.44	-0.34	-0.54	-0.3	0.25	-0.14	0.000614045	0.0876278	26.0536	24.2756	-0.107165	0.450747	0.450747	1.863	1.761	2.446	2.717	2.312	2.714	2.909	3.636	3.515	2.837
Zbtb8os:129024048.7	Zbtb8os:129024048	Zbtb8os	Distal	chr4	129024048	129024397	0.3	0.33	0.3	0.28	0.19	0.17	0.13	0.46	0.25	0.06	0.04	0.11	0.218333	0.3	0.21	0.18	0.33	0.54	0.56	0.68	-0.02	0.43	0.83	0.89	0.71	0.47	0.0146233	0.466791	22.4485	18.8077	0.460788	0.222632	0.222632	2.731	1.629	1.514	2.269	3.019	2.667	4.36	4.71	4.328	4.607
Zbtb8os:129024048.8	Zbtb8os:129024048	Zbtb8os	Proximal	chr4	129024048	129024327	0.6	0.54	0.48	0.61	0.73	0.73	0.81	0.44	0.68	0.89	0.93	0.82	0.688333	0.3	0.21	0.18	0.33	0.54	0.56	0.68	-0.02	0.43	0.83	0.89	0.71	0.47	0.0146233	0.466791	22.4485	18.8077	0.460788	0.222632	0.222632	2.731	1.629	1.514	2.269	3.019	2.667	4.36	4.71	4.328	4.607
Zc3h15:83503977.1	Zc3h15:83503977	Zc3h15	Distal	chr2	83503977	83504764	0.44	0.67	0.47	0.69	0.46	0.48	0.53	0.74	0.67	0.15	0.19	0.65	0.511667	-0.17	-0.53	-0.32	-0.46	-0.09	-0.08	-0.21	-0.65	-0.47	0.59	0.43	-0.48	-0.203333	0.0330345	0.673459	21.8859	18.1838	-0.216591	0.331134	0.331134	2.301	2.075	2.859	4.521	4.558	6.194	9.145	9.591	9.774	10.465
Zc3h15:83503977.2	Zc3h15:83503977	Zc3h15	Proximal	chr2	83503977	83504620	0.27	0.14	0.15	0.23	0.37	0.4	0.32	0.09	0.2	0.74	0.62	0.17	0.308333	-0.17	-0.53	-0.32	-0.46	-0.09	-0.08	-0.21	-0.65	-0.47	0.59	0.43	-0.48	-0.203333	0.0330345	0.673459	21.8859	18.1838	-0.216591	0.331134	0.331134	2.301	2.075	2.859	4.521	4.558	6.194	9.145	9.591	9.774	10.465
Zdhhc20:58455483.3	Zdhhc20:58455483	Zdhhc20	Distal	chr14	58451612	58455483	0.2	0.06	0.1	0.11	0.24	0.15	0.21	0.27	0.1	0.28	0.11	0.21	0.17	-0.14	0.12	0.27	-0.04	-0.21	-0.07	-0.03	-0.02	0.17	-0.21	-0.04	-0.02	-0.0183333	0.00551375	0.327273	20.6047	7.49456	-0.0129165	0.151844	0.151844	1.53	1.6	1.956	2.46	1.85	2.714	3.648	4.267	4.499	3.209
Zdhhc20:58455483.6	Zdhhc20:58455483	Zdhhc20	Proximal	chr14	58454426	58455483	0.06	0.18	0.37	0.07	0.03	0.08	0.18	0.25	0.27	0.07	0.07	0.19	0.151667	-0.14	0.12	0.27	-0.04	-0.21	-0.07	-0.03	-0.02	0.17	-0.21	-0.04	-0.02	-0.0183333	0.00551375	0.327273	20.6047	7.49456	-0.0129165	0.151844	0.151844	1.53	1.6	1.956	2.46	1.85	2.714	3.648	4.267	4.499	3.209
Zeb2:44844673.1	Zeb2:44844673	Zeb2	Distal	chr2	44839156	44844673	0.26	0.32	0.39	0.33	0.33	0.27	0.5	0.39	0.22	0.11	0.26	0.69	0.339167	0.02	0.06	-0.18	0.02	0.04	0.06	-0.36	-0.13	0.1	0.52	0.19	-0.56	-0.0183333	0.00830577	0.372039	20.0539	16.4644	-0.0122417	0.278662	0.278662	2.334	2.542	3.495	3.337	3.358	4.311	4.42	4.365	5.26	5.001
Zeb2:44844673.4	Zeb2:44844673	Zeb2	Proximal	chr2	44842638	44844673	0.28	0.38	0.21	0.35	0.37	0.33	0.14	0.26	0.32	0.63	0.45	0.13	0.320833	0.02	0.06	-0.18	0.02	0.04	0.06	-0.36	-0.13	0.1	0.52	0.19	-0.56	-0.0183333	0.00830577	0.372039	20.0539	16.4644	-0.0122417	0.278662	0.278662	2.334	2.542	3.495	3.337	3.358	4.311	4.42	4.365	5.26	5.001
Zfc3h1:114822864.1	Zfc3h1:114822864	Zfc3h1	Distal	chr10	114822864	114826322	0	0.14	0.17	0.64	0.55	0.42	0.39	0.38	0.64	0.6	0.25	0.25	0.369167	0	0.45	0.28	-0.47	-0.25	-0.12	0.03	-0.11	-0.54	-0.52	0.18	0.12	-0.0791667	0.00773553	0.371887	20.4492	3.49273	-0.11672	0.354073	0.354073	2.505	3.463	5.17	6.252	6.69	8.219	9.178	11.122	12.993	12.257
Zfc3h1:114822864.2	Zfc3h1:114822864	Zfc3h1	Proximal	chr10	114822864	114824698	0	0.59	0.45	0.17	0.3	0.3	0.42	0.27	0.1	0.08	0.43	0.37	0.29	0	0.45	0.28	-0.47	-0.25	-0.12	0.03	-0.11	-0.54	-0.52	0.18	0.12	-0.0791667	0.00773553	0.371887	20.4492	3.49273	-0.11672	0.354073	0.354073	2.505	3.463	5.17	6.252	6.69	8.219	9.178	11.122	12.993	12.257
Zfp120:149943936.5	Zfp120:149943936	Zfp120	Distal	chr2	149942544	149943936	0.19	0.28	0.27	0.35	0.47	0.15	0.14	0.09	0.15	0.27	0.25	0.16	0.230833	0.04	-0.01	-0.17	-0.1	-0.16	0.33	0.14	0.12	0.18	-0.2	-0.03	0.1	0.02	0.0162342	0.484877	27.5015	24.0256	0.0417222	0.179171	0.179171	1.996	1.223	2.184	1.409	2.529	3.294	4.485	4.703	3.7	3.71
Zfp120:149943936.6	Zfp120:149943936	Zfp120	Proximal	chr2	149942896	149943936	0.23	0.27	0.1	0.25	0.31	0.48	0.28	0.21	0.33	0.07	0.22	0.26	0.250833	0.04	-0.01	-0.17	-0.1	-0.16	0.33	0.14	0.12	0.18	-0.2	-0.03	0.1	0.02	0.0162342	0.484877	27.5015	24.0256	0.0417222	0.179171	0.179171	1.996	1.223	2.184	1.409	2.529	3.294	4.485	4.703	3.7	3.71
Zfp259:46089121.1	Zfp259:46089121	Zfp259	Distal	chr9	46089121	46090726	0.17	0.43	0.36	0.41	0.48	0.33	0.34	0.28	0.64	0.57	0.39	0.21	0.384167	0.31	-0.07	-0.03	-0.32	-0.08	0.01	0.16	0.23	-0.41	-0.3	0.04	0.47	0.000833333	0.00109609	0.113154	23.0978	0.520581	-0.00982082	0.301088	0.301088	8.38	9.505	13.251	12.699	9.235	11.385	10.839	15.669	16.76	18.994
Zfp259:46089121.2	Zfp259:46089121	Zfp259	Proximal	chr9	46089121	46089685	0.48	0.36	0.33	0.09	0.4	0.34	0.5	0.51	0.23	0.27	0.43	0.68	0.385	0.31	-0.07	-0.03	-0.32	-0.08	0.01	0.16	0.23	-0.41	-0.3	0.04	0.47	0.000833333	0.00109609	0.113154	23.0978	0.520581	-0.00982082	0.301088	0.301088	8.38	9.505	13.251	12.699	9.235	11.385	10.839	15.669	16.76	18.994
Zfp54:21570367.1	Zfp54:21570367	Zfp54	Distal	chr17	21570367	21572122	0.49	0.69	0.41	0.36	0.41	0.42	0.7	0.7	0.35	0.41	0.49	0.43	0.488333	0.02	-0.38	0.18	0.28	0.18	0.16	-0.4	-0.4	0.3	0.18	0.02	0.14	0.0233333	0.0322204	0.669547	21.9478	14.4255	0.0365612	0.27574	0.27574	0.982	0.914	1.37	1.203	1.544	1.598	3.784	3.331	2.333	4.969
Zfp54:21570367.2	Zfp54:21570367	Zfp54	Proximal	chr17	21570367	21572077	0.51	0.31	0.59	0.64	0.59	0.58	0.3	0.3	0.65	0.59	0.51	0.57	0.511667	0.02	-0.38	0.18	0.28	0.18	0.16	-0.4	-0.4	0.3	0.18	0.02	0.14	0.0233333	0.0322204	0.669547	21.9478	14.4255	0.0365612	0.27574	0.27574	0.982	0.914	1.37	1.203	1.544	1.598	3.784	3.331	2.333	4.969
Zfp790:30613140.1	Zfp790:30613140	Zfp790	Distal	chr7	30613140	30617051	0.22	0.27	0.05	0.15	0.2	0.32	0.61	0.56	0.44	0.09	0.17	0.46	0.295	-0.1	-0.05	0.22	0.02	0.18	-0.15	-0.53	-0.47	-0.36	0.44	-0.1	-0.29	-0.0991667	0.034719	0.693419	26.6888	10.7996	-0.129077	0.314454	0.314454	3.067	3.075	3.609	3.35	2.871	4.37	4.801	5.003	3.451	5.478
Zfp790:30613140.5	Zfp790:30613140	Zfp790	Proximal	chr7	30613140	30616024	0.12	0.22	0.27	0.17	0.38	0.17	0.08	0.09	0.08	0.53	0.07	0.17	0.195833	-0.1	-0.05	0.22	0.02	0.18	-0.15	-0.53	-0.47	-0.36	0.44	-0.1	-0.29	-0.0991667	0.034719	0.693419	26.6888	10.7996	-0.129077	0.314454	0.314454	3.067	3.075	3.609	3.35	2.871	4.37	4.801	5.003	3.451	5.478
Zfp870:33021110.6	Zfp870:33021110	Zfp870	Distal	chr17	33018276	33021110	0.09	0.21	0.15	0.12	0.13	0.04	0.1	0.25	0.35	0.29	0.15	0.09	0.164167	0.6	0.21	0.4	0.62	0.49	0.63	0.65	0.27	0.12	0.26	0.39	0.58	0.435	0.0044712	0.293166	27.3999	19.3562	0.459288	0.223347	0.223347	2.127	1.447	2.475	3.025	2.362	3.363	4.541	4.709	4.278	3.757
Zfp870:33021110.7	Zfp870:33021110	Zfp870	Proximal	chr17	33018944	33021110	0.69	0.42	0.55	0.74	0.62	0.67	0.75	0.52	0.47	0.55	0.54	0.67	0.599167	0.6	0.21	0.4	0.62	0.49	0.63	0.65	0.27	0.12	0.26	0.39	0.58	0.435	0.0044712	0.293166	27.3999	19.3562	0.459288	0.223347	0.223347	2.127	1.447	2.475	3.025	2.362	3.363	4.541	4.709	4.278	3.757
Zfyve21:113066029.1	Zfyve21:113066029	Zfyve21	Distal	chr12	113066029	113066597	0.2	0.42	0.61	0.38	0.37	0.16	0.22	0.47	0.53	0.24	0.21	0.46	0.355833	0.49	0	-0.33	-0.1	0.16	0.27	0.31	-0.06	-0.25	-0.08	0.48	-0.22	0.0558333	0.0181376	0.510557	21.9788	20.6921	0.0339617	0.279318	0.279318	3.155	3.202	3.257	2.76	4.596	5.996	8.629	6.379	8.995	5.86
Zfyve21:113066029.2	Zfyve21:113066029	Zfyve21	Proximal	chr12	113066029	113066556	0.69	0.42	0.28	0.28	0.53	0.43	0.53	0.41	0.28	0.16	0.69	0.24	0.411667	0.49	0	-0.33	-0.1	0.16	0.27	0.31	-0.06	-0.25	-0.08	0.48	-0.22	0.0558333	0.0181376	0.510557	21.9788	20.6921	0.0339617	0.279318	0.279318	3.155	3.202	3.257	2.76	4.596	5.996	8.629	6.379	8.995	5.86
Zhx1:57880340.1	Zhx1:57880340	Zhx1	Distal	chr15	57878559	57880340	0.12	0.07	0.11	0.13	0.28	0.09	0.24	0.18	0.3	0.11	0.32	0.43	0.198333	0.32	0.36	0.37	0.15	-0.15	0.17	0.3	0.49	0.16	0.45	0.11	-0.12	0.2175	0.0290331	0.631697	26.6483	3.51804	0.209552	0.213408	0.213408	6.291	4.896	7.022	7.689	6.265	11.168	15.06	15.37	16.685	16.497
Zhx1:57880340.2	Zhx1:57880340	Zhx1	Proximal	chr15	57878860	57880340	0.44	0.43	0.48	0.28	0.13	0.26	0.54	0.67	0.46	0.56	0.43	0.31	0.415833	0.32	0.36	0.37	0.15	-0.15	0.17	0.3	0.49	0.16	0.45	0.11	-0.12	0.2175	0.0290331	0.631697	26.6483	3.51804	0.209552	0.213408	0.213408	6.291	4.896	7.022	7.689	6.265	11.168	15.06	15.37	16.685	16.497
																																								9 A1	9 A1	protein-coding
																																								protein-coding	protein-coding
																																								7 A3	7 A3	7 13.84 cM	protein-coding
																																								POH	POH	SCG6	-	2 H4	2 97.89 cM	protein-coding
																																								protein-coding	protein-coding
[truncated: 10 more columns]

## Sheet: Dataset2_Vollmers
Transcript	Isoform	Gene	Proximal/Distal	Chromosome	UTR_start	UTR_end	CT_0_MISO_psi	CT_3_MISO_psi	CT_6_MISO_psi	CT_9_MISO_psi	CT_12_MISO_psi	CT_15_MISO_psi	CT_18_MISO_psi	CT_21_MISO_psi	Average_MISO_psi	CT_0_MISO_delta psi	CT_3_MISO_delta psi	CT_6_MISO_delta psi	CT_9_MISO_delta psi	CT_12_MISO_delta psi	CT_15_MISO_delta psi	CT_18_MISO_delta psi	CT_21_MISO_delta psi	Average_MISO_delta_psi	meta2d_pvalue	meta2d_BH.Q	meta2d_period	meta2d_phase	meta2d_Base	meta2d_AMP	meta2d_rAMP	Vollmer_CT0_tag	Vollmer_CT3_tag	Vollmer_CT6_tag	Vollmer_CT9_tag	Vollmer_CT12_tag	Vollmer_CT15_tag	Vollmer_CT18_tag	Vollmer_CT21_tag	AVG_TPM	meta2d_pvalue	meta2d_BH.Q	meta2d_period	meta2d_phase	meta2d_Base	meta2d_AMP	meta2d_rAMP
1110034B05Rik:57445596.1	1110034B05Rik:57445596	1110034B05Rik	Distal	chr1	57445090	57445596	0.22	0.11	0.16	0.46	0.55	0.61	0.31	0.14	0.32	0.56	0.78	0.68	0.08	-0.1	-0.22	0.38	0.72	0.36	0.00285334	0.707086	20.7447	2.72281	0.309346	0.531753	0.531753	5.173	4.846	4.535	4.228	3.444	3.194	5.761	5.164	4.54312	0.178047	1	21.7952	0.253531	4.46039	0.903595	0.202582
1110034B05Rik:57445596.2	1110034B05Rik:57445596	1110034B05Rik	Proximal	chr1	57445269	57445596	0.78	0.89	0.84	0.54	0.45	0.39	0.69	0.86	0.68	0.56	0.78	0.68	0.08	-0.1	-0.22	0.38	0.72	0.36	0.00285334	0.707086	20.7447	2.72281	0.309346	0.531753	0.531753	5.173	4.846	4.535	4.228	3.444	3.194	5.761	5.164	4.54312	0.178047	1	21.7952	0.253531	4.46039	0.903595	0.202582
2210016F16Rik:58483370.5	2210016F16Rik:58483370	2210016F16Rik	Distal	chr13	58482876	58483370	0.13	0.14	0.17	0.16	0.23	0.28	0.18	0.21	0.1875	0.59	0.55	0.55	0.51	0.31	0.19	0.43	0.47	0.45	0.0301032	1	22.2722	2.68868	0.443504	0.149528	0.149528	23.096	21.076	24.55	26.385	20.561	22.978	20.804	26.284	23.2168	0.992386	1	21.6667	5.71929	23.2587	2.32208	0.0998373
2210016F16Rik:58483370.6	2210016F16Rik:58483370	2210016F16Rik	Proximal	chr13	58483040	58483370	0.72	0.69	0.72	0.67	0.54	0.47	0.61	0.68	0.6375	0.59	0.55	0.55	0.51	0.31	0.19	0.43	0.47	0.45	0.0301032	1	22.2722	2.68868	0.443504	0.149528	0.149528	23.096	21.076	24.55	26.385	20.561	22.978	20.804	26.284	23.2168	0.992386	1	21.6667	5.71929	23.2587	2.32208	0.0998373
2510003E04Rik:62022631.1	2510003E04Rik:62022631	2510003E04Rik	Distal	chr10	62021218	62022631	0.14	0.15	0.26	0.4	0.46	0.36	0.37	0.27	0.30125	0.31	0.28	0.01	-0.19	-0.27	-0.03	-0.16	0.03	-0.0025	0.00385806	0.707086	23.6185	0.717343	-0.00542236	0.20868	0.20868	5.638	5.351	5.027	4.916	4.559	5.442	4.688	5.123	5.093	0.740358	1	24.2639	22.3663	5.09594	0.260958	0.051209
2510003E04Rik:62022631.4	2510003E04Rik:62022631	2510003E04Rik	Proximal	chr10	62022075	62022631	0.45	0.43	0.27	0.21	0.19	0.33	0.21	0.3	0.29875	0.31	0.28	0.01	-0.19	-0.27	-0.03	-0.16	0.03	-0.0025	0.00385806	0.707086	23.6185	0.717343	-0.00542236	0.20868	0.20868	5.638	5.351	5.027	4.916	4.559	5.442	4.688	5.123	5.093	0.740358	1	24.2639	22.3663	5.09594	0.260958	0.051209
2610101N10Rik:95361962.2	2610101N10Rik:95361962	2610101N10Rik	Distal	chr9	95357313	95361962	0.51	0.34	0.28	0.29	0.17	0.22	0.24	0.5	0.31875	-0.41	-0.21	-0.04	-0.1	0.24	0.11	-0.01	-0.32	-0.0925	0.0167011	0.896864	24.3622	13.0072	-0.0959568	0.279961	0.279961	4.467	5.302	4.05	5.944	4.237	4.134	5.016	4.198	4.6685	0.99961	1	21.7409	7.3139	4.68257	0.243655	0.0520345
2610101N10Rik:95361962.6	2610101N10Rik:95361962	2610101N10Rik	Proximal	chr9	95361393	95361962	0.1	0.13	0.24	0.19	0.41	0.33	0.23	0.18	0.22625	-0.41	-0.21	-0.04	-0.1	0.24	0.11	-0.01	-0.32	-0.0925	0.0167011	0.896864	24.3622	13.0072	-0.0959568	0.279961	0.279961	4.467	5.302	4.05	5.944	4.237	4.134	5.016	4.198	4.6685	0.99961	1	21.7409	7.3139	4.68257	0.243655	0.0520345
4833439L19Rik:54654178.4	4833439L19Rik:54654178	4833439L19Rik	Distal	chr13	54652487	54654178	0.46	0.29	0.25	0.16	0.21	0.19	0.22	0.21	0.24875	-0.05	0.28	0.42	0.6	0.5	0.51	0.46	0.46	0.3975	0.0278094	0.947076	25.0698	11.4579	0.389768	0.17494	0.17494	28.395	28.879	24.859	32.85	41.205	48.332	43.657	34.105	35.2852	0.0275737	0.539226	23.4957	15.3894	35.3507	11.6565	0.329739
4833439L19Rik:54654178.5	4833439L19Rik:54654178	4833439L19Rik	Proximal	chr13	54652579	54654178	0.41	0.57	0.67	0.76	0.71	0.7	0.68	0.67	0.64625	-0.05	0.28	0.42	0.6	0.5	0.51	0.46	0.46	0.3975	0.0278094	0.947076	25.0698	11.4579	0.389768	0.17494	0.17494	28.395	28.879	24.859	32.85	41.205	48.332	43.657	34.105	35.2852	0.0275737	0.539226	23.4957	15.3894	35.3507	11.6565	0.329739
Abhd12:150658876.1	Abhd12:150658876	Abhd12	Distal	chr2	150658222	150658876	0.34	0.41	0.23	0.21	0.23	0.33	0.37	0.38	0.3125	0.32	0.18	0.54	0.58	0.54	0.34	0.26	0.24	0.375	0.0473671	1	21.7952	9.92648	0.390866	0.172577	0.172577	2.256	3.344	2.93	3.44	2.524	2.534	3.114	2.953	2.88687	0.95682	1	21.6667	6.047	2.90019	0.490328	0.169067
Abhd12:150658876.2	Abhd12:150658876	Abhd12	Proximal	chr2	150658251	150658876	0.66	0.59	0.77	0.79	0.77	0.67	0.63	0.62	0.6875	0.32	0.18	0.54	0.58	0.54	0.34	0.26	0.24	0.375	0.0473671	1	21.7952	9.92648	0.390866	0.172577	0.172577	2.256	3.344	2.93	3.44	2.524	2.534	3.114	2.953	2.88687	0.95682	1	21.6667	6.047	2.90019	0.490328	0.169067
Abl1:31655726.4	Abl1:31655726	Abl1	Distal	chr2	31655726	31659753	0.13	0.13	0.07	0.1	0.08	0.11	0.22	0.18	0.1275	0.46	0.42	0.72	0.63	0.64	0.53	0.25	0.22	0.48375	0.0115904	0.806085	23.3906	9.51714	0.488624	0.193706	0.193706	2.589	2.121	3.38	3.552	3.059	3.649	2.58	2.181	2.88888	0.133038	1	21.916	11.5506	2.9442	0.65653	0.222991
Abl1:31655726.5	Abl1:31655726	Abl1	Proximal	chr2	31655726	31659055	0.59	0.55	0.79	0.73	0.72	0.64	0.47	0.4	0.61125	0.46	0.42	0.72	0.63	0.64	0.53	0.25	0.22	0.48375	0.0115904	0.806085	23.3906	9.51714	0.488624	0.193706	0.193706	2.589	2.121	3.38	3.552	3.059	3.649	2.58	2.181	2.88888	0.133038	1	21.916	11.5506	2.9442	0.65653	0.222991
Acad9:35989753.4	Acad9:35989753	Acad9	Distal	chr3	35989753	35990382	0.56	0.45	0.38	0.21	0.34	0.36	0.45	0.48	0.40375	-0.22	-0.15	0.18	0.47	0.09	0.08	-0.21	-0.16	0.01	0.00248893	0.706358	20.4898	9.71322	0.0497493	0.283613	0.283613	5.486	7.677	9.501	7.863	6.977	7.29	9.186	7.491	7.68388	0.965224	1	20.5972	6.22998	7.72658	1.14822	0.148606
Acad9:35989753.5	Acad9:35989753	Acad9	Proximal	chr3	35989753	35990308	0.34	0.3	0.56	0.68	0.43	0.44	0.24	0.32	0.41375	-0.22	-0.15	0.18	0.47	0.09	0.08	-0.21	-0.16	0.01	0.00248893	0.706358	20.4898	9.71322	0.0497493	0.283613	0.283613	5.486	7.677	9.501	7.863	6.977	7.29	9.186	7.491	7.68388	0.965224	1	20.5972	6.22998	7.72658	1.14822	0.148606
Acvr1:58300084.2	Acvr1:58300084	Acvr1	Distal	chr2	58298904	58300084	0.28	0.24	0.35	0.44	0.31	0.27	0.15	0.18	0.2775	0.26	0.39	0.09	-0.14	0.19	0.28	0.61	0.52	0.275	0.0309184	1	21.5253	20.0898	0.251331	0.241187	0.241187	1.31	0.952	1.174	1.238	0.944	1.307	1.621	0.72	1.15825	0.992175	1	21.6667	16.9252	1.15156	0.235528	0.204529
Acvr1:58300084.3	Acvr1:58300084	Acvr1	Proximal	chr2	58299942	58300084	0.54	0.63	0.44	0.3	0.5	0.55	0.76	0.7	0.5525	0.26	0.39	0.09	-0.14	0.19	0.28	0.61	0.52	0.275	0.0309184	1	21.5253	20.0898	0.251331	0.241187	0.241187	1.31	0.952	1.174	1.238	0.944	1.307	1.621	0.72	1.15825	0.992175	1	21.6667	16.9252	1.15156	0.235528	0.204529
Adarb1:76757706.1	Adarb1:76757706	Adarb1	Distal	chr10	76753472	76757706	0.46	0.53	0.74	0.69	0.72	0.76	0.65	0.59	0.6425	-0.15	-0.34	-0.67	-0.61	-0.65	-0.71	-0.52	-0.45	-0.5125	0.0151273	0.896864	25.5154	25.2204	-0.500356	0.213537	0.213537	#N/A	#N/A	#N/A	#N/A	#N/A	#N/A	#N/A	#N/A	#N/A	#N/A	#N/A	#N/A	#N/A	#N/A	#N/A	#N/A
Adarb1:76757706.2	Adarb1:76757706	Adarb1	Proximal	chr10	76754574	76757706	0.31	0.19	0.07	0.08	0.07	0.05	0.13	0.14	0.13	-0.15	-0.34	-0.67	-0.61	-0.65	-0.71	-0.52	-0.45	-0.5125	0.0151273	0.896864	25.5154	25.2204	-0.500356	0.213537	0.213537	#N/A	#N/A	#N/A	#N/A	#N/A	#N/A	#N/A	#N/A	#N/A	#N/A	#N/A	#N/A	#N/A	#N/A	#N/A	#N/A
Adi1:29365831.1	Adi1:29365831	Adi1	Distal	chr12	29365831	29367040	0.95	0.89	0.99	0.98	0.94	0.87	0.72	0.79	0.89125	-0.9	-0.78	-0.98	-0.96	-0.88	-0.74	-0.44	-0.58	-0.7825	0.0469648	1	24.9855	20.5701	-0.777079	0.157598	0.157598	52.252	51.907	64.065	87.208	75.539	50.324	71.049	64.322	64.5833	0.678457	1	20.6457	9.10202	66.0236	11.4145	0.172886
Adi1:29365831.2	Adi1:29365831	Adi1	Proximal	chr12	29365831	29366473	0.05	0.11	0.01	0.02	0.06	0.13	0.28	0.21	0.10875	-0.9	-0.78	-0.98	-0.96	-0.88	-0.74	-0.44	-0.58	-0.7825	0.0469648	1	24.9855	20.5701	-0.777079	0.157598	0.157598	52.252	51.907	64.065	87.208	75.539	50.324	71.049	64.322	64.5833	0.678457	1	20.6457	9.10202	66.0236	11.4145	0.172886
AI317395:39723395.1	AI317395:39723395	AI317395	Distal	chr10	39721377	39723395	0.83	0.73	0.48	0.74	0.81	0.91	0.85	0.8	0.76875	-0.75	-0.56	-0.22	-0.63	-0.72	-0.87	-0.77	-0.7	-0.6525	0.01859	0.896864	21.6667	5.95899	-0.645731	0.273664	0.273664	13.608	10.935	13.546	15.252	17.976	14.473	15.157	13.473	14.3025	0.0826149	0.926534	21.9887	12.5857	14.449	2.07693	0.143742
AI317395:39723395.2	AI317395:39723395	AI317395	Proximal	chr10	39722150	39723395	0.08	0.17	0.26	0.11	0.09	0.04	0.08	0.1	0.11625	-0.75	-0.56	-0.22	-0.63	-0.72	-0.87	-0.77	-0.7	-0.6525	0.01859	0.896864	21.6667	5.95899	-0.645731	0.273664	0.273664	13.608	10.935	13.546	15.252	17.976	14.473	15.157	13.473	14.3025	0.0826149	0.926534	21.9887	12.5857	14.449	2.07693	0.143742
Akr1c6:4456395.1	Akr1c6:4456395	Akr1c6	Distal	chr13	4456395	4456772	0.63	0.72	0.59	0.56	0.43	0.53	0.76	0.81	0.62875	-0.26	-0.44	-0.18	-0.12	0.14	-0.06	-0.52	-0.62	-0.2575	0.0135679	0.851553	20.5023	11.8514	-0.217199	0.305978	0.305978	606.555	605.84	649.392	614.566	733.38	616.862	644.415	487.532	619.818	0.472674	1	22.4429	13.2563	623.551	78.563	0.125993
Akr1c6:4456395.2	Akr1c6:4456395	Akr1c6	Proximal	chr13	4456395	4456643	0.37	0.28	0.41	0.44	0.57	0.47	0.24	0.19	0.37125	-0.26	-0.44	-0.18	-0.12	0.14	-0.06	-0.52	-0.62	-0.2575	0.0135679	0.851553	20.5023	11.8514	-0.217199	0.305978	0.305978	606.555	605.84	649.392	614.566	733.38	616.862	644.415	487.532	619.818	0.472674	1	22.4429	13.2563	623.551	78.563	0.125993
Arglu1:8667416.3	Arglu1:8667416	Arglu1	Distal	chr8	8666307	8667416	0.14	0.12	0.05	0.08	0.08	0.12	0.22	0.36	0.14625	0.58	0.52	0.73	0.59	0.64	0.5	0.29	0.02	0.48375	0.0159436	0.896864	25.3333	9.60536	0.473271	0.18979	0.18979	6.873	7.73	8.72	11.123	7.905	6.355	9.058	7.139	8.11288	0.765788	1	20.4558	8.64731	8.27029	1.2835	0.155194
Arglu1:8667416.4	Arglu1:8667416	Arglu1	Proximal	chr8	8666576	8667416	0.72	0.64	0.78	0.67	0.72	0.62	0.51	0.38	0.63	0.58	0.52	0.73	0.59	0.64	0.5	0.29	0.02	0.48375	0.0159436	0.896864	25.3333	9.60536	0.473271	0.18979	0.18979	6.873	7.73	8.72	11.123	7.905	6.355	9.058	7.139	8.11288	0.765788	1	20.4558	8.64731	8.27029	1.2835	0.155194
Arl8a:137051799.1	Arl8a:137051799	Arl8a	Distal	chr1	137051799	137052844	0.32	0.57	0.52	0.65	0.57	0.38	0.33	0.27	0.45125	0.07	-0.27	-0.16	-0.4	-0.22	0.12	0.16	0.13	-0.07125	0.0229068	0.896864	22.7323	19.1981	-0.0813869	0.253211	0.253211	4.778	8.415	11.498	9.577	10.962	6.239	8.607	4.086	8.02025	0.166142	1	24.3622	9.0458	7.97603	3.07218	0.385177
Arl8a:137051799.2	Arl8a:137051799	Arl8a	Proximal	chr1	137051799	137052776	0.39	0.3	0.36	0.25	0.35	0.5	0.49	0.4	0.38	0.07	-0.27	-0.16	-0.4	-0.22	0.12	0.16	0.13	-0.07125	0.0229068	0.896864	22.7323	19.1981	-0.0813869	0.253211	0.253211	4.778	8.415	11.498	9.577	10.962	6.239	8.607	4.086	8.02025	0.166142	1	24.3622	9.0458	7.97603	3.07218	0.385177
Atg4b:95684263.3	Atg4b:95684263	Atg4b	Distal	chr1	95684263	95686011	0.18	0.23	0.28	0.25	0.29	0.27	0.28	0.2	0.2475	0.56	0.44	0.33	0.32	0.19	0.27	0.16	0.39	0.3325	0.0435246	1	25.2144	0.21833	0.337851	0.123921	0.123921	5.578	6.968	5.954	4.878	5.996	5.898	5.794	5.413	5.80987	0.999636	1	24.4619	10.4793	5.81203	0.109262	0.0187993
Atg4b:95684263.4	Atg4b:95684263	Atg4b	Proximal	chr1	95684263	95684762	0.74	0.67	0.61	0.57	0.48	0.54	0.44	0.59	0.58	0.56	0.44	0.33	0.32	0.19	0.27	0.16	0.39	0.3325	0.0435246	1	25.2144	0.21833	0.337851	0.123921	0.123921	5.578	6.968	5.954	4.878	5.996	5.898	5.794	5.413	5.80987	0.999636	1	24.4619	10.4793	5.81203	0.109262	0.0187993
Atp13a3:30315987.1	Atp13a3:30315987	Atp13a3	Distal	chr16	30312509	30315987	0.48	0.45	0.25	0.35	0.19	0.33	0.35	0.43	0.35375	-0.28	-0.18	0	-0.05	0.13	0.08	-0.18	-0.21	-0.08625	0.00603703	0.759369	24.0819	11.5964	-0.0868561	0.18037	0.18037	16.15	16.124	15.001	22.318	22.535	19.587	23.964	15.496	18.8969	0.516391	1	22.5742	13.6063	19.0538	3.97907	0.208833
Atp13a3:30315987.4	Atp13a3:30315987	Atp13a3	Proximal	chr16	30313253	30315987	0.2	0.27	0.25	0.3	0.32	0.41	0.17	0.22	0.2675	-0.28	-0.18	0	-0.05	0.13	0.08	-0.18	-0.21	-0.08625	0.00603703	0.759369	24.0819	11.5964	-0.0868561	0.18037	0.18037	16.15	16.124	15.001	22.318	22.535	19.587	23.964	15.496	18.8969	0.516391	1	22.5742	13.6063	19.0538	3.97907	0.208833
Atp5j2:145944736.1	Atp5j2:145944736	Atp5j2	Distal	chr5	145944573	145944736	0.54	0.54	0.51	0.4	0.38	0.43	0.39	0.59	0.4725	-0.08	-0.08	-0.02	0.2	0.24	0.14	0.22	-0.18	0.055	0.0433439	1	21.4747	12.6223	0.0718011	0.194474	0.194474	87.49	85.704	78.924	42.962	68.165	82.266	68.313	82.795	74.5774	0.245184	1	21.7447	21.7232	73.3869	12.56	0.171148
Atp5j2:145944736.2	Atp5j2:145944736	Atp5j2	Proximal	chr5	145944688	145944736	0.46	0.46	0.49	0.6	0.62	0.57	0.61	0.41	0.5275	-0.08	-0.08	-0.02	0.2	0.24	0.14	0.22	-0.18	0.055	0.0433439	1	21.4747	12.6223	0.0718011	0.194474	0.194474	87.49	85.704	78.924	42.962	68.165	82.266	68.313	82.795	74.5774	0.245184	1	21.7447	21.7232	73.3869	12.56	0.171148
Bccip:140912390.2	Bccip:140912390	Bccip	Distal	chr7	140912390	140912787	0.08	0.15	0.17	0.26	0.46	0.22	0.32	0.13	0.22375	0.8	0.69	0.64	0.38	0.07	0.54	0.33	0.73	0.5225	0.0435673	1	22.8282	0.500915	0.510742	0.254083	0.254083	74.701	70.566	59.767	46.848	77.841	70.197	54.862	61.191	64.4966	0.987872	1	21.0049	15.9629	64.4215	9.51468	0.147694
Bccip:140912390.3	Bccip:140912390	Bccip	Proximal	chr7	140912390	140912638	0.88	0.84	0.81	0.64	0.53	0.76	0.65	0.86	0.74625	0.8	0.69	0.64	0.38	0.07	0.54	0.33	0.73	0.5225	0.0435673	1	22.8282	0.500915	0.510742	0.254083	0.254083	74.701	70.566	59.767	46.848	77.841	70.197	54.862	61.191	64.4966	0.987872	1	21.0049	15.9629	64.4215	9.51468	0.147694
Btg2:135974280.1	Btg2:135974280	Btg2	Distal	chr1	135971879	135974280	0.3	0.26	0.23	0.24	0.37	0.34	0.36	0.24	0.2925	0.16	0.09	0	0.01	-0.03	-0.01	0.07	0.21	0.0625	0.00139265	0.670953	23.46	0.20003	0.0601187	0.111162	0.111162	24.649	25.7	8.29	10.267	13.604	14.317	19.291	12.355	16.0591	0.56477	1	21.6667	19.6511	15.5067	6.35203	0.409632
Btg2:135974280.2	Btg2:135974280	Btg2	Proximal	chr1	135971904	135974280	0.46	0.35	0.23	0.25	0.34	0.33	0.43	0.45	0.355	0.16	0.09	0	0.01	-0.03	-0.01	0.07	0.21	0.0625	0.00139265	0.670953	23.46	0.20003	0.0601187	0.111162	0.111162	24.649	25.7	8.29	10.267	13.604	14.317	19.291	12.355	16.0591	0.56477	1	21.6667	19.6511	15.5067	6.35203	0.409632
Cald1:34723223.1	Cald1:34723223	Cald1	Distal	chr6	34723223	34725469	0.33	0.39	0.3	0.56	0.74	0.48	0.42	0.17	0.42375	0.34	0.22	0.4	-0.12	-0.48	0.04	0.16	0.66	0.1525	0.0183452	0.896864	20.5023	1.98374	0.100321	0.420753	0.420753	20.296	24.965	21.385	24.887	18.718	18.237	25.613	21.767	21.9835	0.991307	1	21.6667	4.82449	21.9654	2.45149	0.111607
Cald1:34723223.2	Cald1:34723223	Cald1	Proximal	chr6	34723223	34725443	0.67	0.61	0.7	0.44	0.26	0.52	0.58	0.83	0.57625	0.34	0.22	0.4	-0.12	-0.48	0.04	0.16	0.66	0.1525	0.0183452	0.896864	20.5023	1.98374	0.100321	0.420753	0.420753	20.296	24.965	21.385	24.887	18.718	18.237	25.613	21.767	21.9835	0.991307	1	21.6667	4.82449	21.9654	2.45149	0.111607
Cast:74832281.1	Cast:74832281	Cast	Distal	chr13	74829814	74832281	0.6	0.54	0.21	0.32	0.45	0.61	0.66	0.57	0.495	-0.36	-0.3	0.5	0.27	-0.12	-0.4	-0.51	-0.36	-0.16	0.0133333	0.851553	21.6667	7.95298	-0.128114	0.438017	0.438017	6.474	6.486	6.381	7.636	7.798	6.278	6.785	6.028	6.73325	0.370849	1	21.4558	11.9889	6.796	0.647121	0.0952209
Cast:74832281.2	Cast:74832281	Cast	Proximal	chr13	74831551	74832281	0.24	0.24	0.71	0.59	0.33	0.21	0.15	0.21	0.335	-0.36	-0.3	0.5	0.27	-0.12	-0.4	-0.51	-0.36	-0.16	0.0133333	0.851553	21.6667	7.95298	-0.128114	0.438017	0.438017	6.474	6.486	6.381	7.636	7.798	6.278	6.785	6.028	6.73325	0.370849	1	21.4558	11.9889	6.796	0.647121	0.0952209
Ccdc93:123397767.1	Ccdc93:123397767	Ccdc93	Distal	chr1	123397767	123403037	0.41	0.39	0.59	0.67	0.58	0.7	0.58	0.53	0.55625	-0.12	-0.11	-0.39	-0.47	-0.4	-0.54	-0.32	-0.3	-0.33125	0.0347875	1	22.8946	1.03791	-0.337619	0.157762	0.157762	1.311	1.199	1.38	1.513	1.358	1.884	1.388	1.502	1.44188	0.87692	1	24.2667	14.2843	1.44088	0.156447	0.108577
Ccdc93:123397767.3	Ccdc93:123397767	Ccdc93	Proximal	chr1	123397767	123397946	0.29	0.28	0.2	0.2	0.18	0.16	0.26	0.23	0.225	-0.12	-0.11	-0.39	-0.47	-0.4	-0.54	-0.32	-0.3	-0.33125	0.0347875	1	22.8946	1.03791	-0.337619	0.157762	0.157762	1.311	1.199	1.38	1.513	1.358	1.884	1.388	1.502	1.44188	0.87692	1	24.2667	14.2843	1.44088	0.156447	0.108577
Cep68:20129484.2	Cep68:20129484	Cep68	Distal	chr11	20126417	20129484	0.11	0.21	0.19	0.28	0.33	0.26	0.27	0.14	0.22375	0.07	-0.02	-0.01	-0.2	-0.22	-0.14	-0.14	0.05	-0.07625	0.00753757	0.789455	23.2618	0.259858	-0.0801809	0.133873	0.133873	4.104	3.497	5.123	4.641	4.665	3.658	5.58	4.359	4.45338	0.999651	1	25.3333	10.7521	4.44378	0.169871	0.0382268
Cep68:20129484.3	Cep68:20129484	Cep68	Proximal	chr11	20126930	20129484	0.18	0.19	0.18	0.08	0.11	0.12	0.13	0.19	0.1475	0.07	-0.02	-0.01	-0.2	-0.22	-0.14	-0.14	0.05	-0.07625	0.00753757	0.789455	23.2618	0.259858	-0.0801809	0.133873	0.133873	4.104	3.497	5.123	4.641	4.665	3.658	5.58	4.359	4.45338	0.999651	1	25.3333	10.7521	4.44378	0.169871	0.0382268
Cep68:20129484.2.1	Cep68:20129484.1	Cep68	Distal	chr11	20126417	20129484	0.11	0.21	0.19	0.28	0.33	0.26	0.27	0.14	0.22375	0.08	-0.08	-0.05	-0.16	-0.2	-0.18	-0.13	0.11	-0.07625	0.0200547	0.896864	24.3622	0.271743	-0.0742032	0.151063	0.151063	4.104	3.497	5.123	4.641	4.665	3.658	5.58	4.359	4.45338	0.999651	1	25.3333	10.7521	4.44378	0.169871	0.0382268
Cep68:20129484.4.1	Cep68:20129484.1	Cep68	Proximal	chr11	20127039	20129484	0.19	0.13	0.14	0.12	0.13	0.08	0.14	0.25	0.1475	0.08	-0.08	-0.05	-0.16	-0.2	-0.18	-0.13	0.11	-0.07625	0.0200547	0.896864	24.3622	0.271743	-0.0742032	0.151063	0.151063	4.104	3.497	5.123	4.641	4.665	3.658	5.58	4.359	4.45338	0.999651	1	25.3333	10.7521	4.44378	0.169871	0.0382268
Chpt1:87937018.2	Chpt1:87937018	Chpt1	Distal	chr10	87936275	87937018	0.25	0.26	0.31	0.28	0.39	0.39	0.46	0.38	0.34	-0.04	0.02	0.21	-0.03	-0.09	-0.21	-0.21	-0.13	-0.06	0.00880879	0.789455	23.4957	5.84187	-0.0588106	0.172612	0.172612	39.837	28.699	43.548	50.89	55.045	49.981	58.687	43.845	46.3165	0.169852	1	24.2667	14.0609	46.2478	9.98497	0.215902
Chpt1:87937018.3	Chpt1:87937018	Chpt1	Proximal	chr10	87936369	87937018	0.21	0.28	0.52	0.25	0.3	0.18	0.25	0.25	0.28	-0.04	0.02	0.21	-0.03	-0.09	-0.21	-0.21	-0.13	-0.06	0.00880879	0.789455	23.4957	5.84187	-0.0588106	0.172612	0.172612	39.837	28.699	43.548	50.89	55.045	49.981	58.687	43.845	46.3165	0.169852	1	24.2667	14.0609	46.2478	9.98497	0.215902
Clcn3:63391972.2	Clcn3:63391972	Clcn3	Distal	chr8	63389189	63391972	0.41	0.59	0.3	0.31	0.31	0.39	0.51	0.59	0.42625	-0.16	-0.4	-0.04	0.08	0.02	-0.06	-0.36	-0.41	-0.16625	0.00914309	0.789455	21.3647	10.5595	-0.142351	0.216058	0.216058	8.51	8.143	7.127	9.206	9.568	8.471	9.283	7.053	8.42012	0.713458	1	22.6667	13.5854	8.46154	1.11023	0.131209
Clcn3:63391972.3	Clcn3:63391972	Clcn3	Proximal	chr8	63389657	63391972	0.25	0.19	0.26	0.39	0.33	0.33	0.15	0.18	0.26	-0.16	-0.4	-0.04	0.08	0.02	-0.06	-0.36	-0.41	-0.16625	0.00914309	0.789455	21.3647	10.5595	-0.142351	0.216058	0.216058	8.51	8.143	7.127	9.206	9.568	8.471	9.283	7.053	8.42012	0.713458	1	22.6667	13.5854	8.46154	1.11023	0.131209
Clec14a:59370245.4	Clec14a:59370245	Clec14a	Distal	chr12	59366778	59370245	0.21	0.16	0.37	0.19	0.13	0.13	0.11	0.17	0.18375	0.02	-0.04	-0.32	-0.08	-0.06	0.02	0.15	0.04	-0.03375	0.027524	0.947076	23.1973	19.3691	-0.0374001	0.143955	0.143955	18.336	16.764	20.181	22.646	15.343	15.79	19.269	16.458	18.0984	0.986689	1	22.5873	7.33523	18.158	1.5538	0.085571
Clec14a:59370245.5	Clec14a:59370245	Clec14a	Proximal	chr12	59367032	59370245	0.23	0.12	0.05	0.11	0.07	0.15	0.26	0.21	0.15	0.02	-0.04	-0.32	-0.08	-0.06	0.02	0.15	0.04	-0.03375	0.027524	0.947076	23.1973	19.3691	-0.0374001	0.143955	0.143955	18.336	16.764	20.181	22.646	15.343	15.79	19.269	16.458	18.0984	0.986689	1	22.5873	7.33523	18.158	1.5538	0.085571
Clock:76645903.2	Clock:76645903	Clock	Distal	chr5	76638971	76645903	0.32	0.26	0.33	0.16	0.25	0.24	0.38	0.37	0.28875	0	0.11	0.07	0.31	0.13	0.11	-0.06	-0.17	0.0625	0.0176832	0.896864	24.5602	10.4299	0.0587862	0.155401	0.155401	6.406	6.971	5.213	3.691	3.062	4.947	7.955	5.725	5.49625	0.0884653	0.952121	21.5023	0.147108	5.31763	1.71088	0.321737
Clock:76645903.4	Clock:76645903	Clock	Proximal	chr5	76641205	76645903	0.32	0.37	0.4	0.47	0.38	0.35	0.32	0.2	0.35125	0	0.11	0.07	0.31	0.13	0.11	-0.06	-0.17	0.0625	0.0176832	0.896864	24.5602	10.4299	0.0587862	0.155401	0.155401	6.406	6.971	5.213	3.691	3.062	4.947	7.955	5.725	5.49625	0.0884653	0.952121	21.5023	0.147108	5.31763	1.71088	0.321737
Commd5:76730782.4	Commd5:76730782	Commd5	Distal	chr15	76730782	76731867	0.17	0.09	0.18	0.17	0.18	0.18	0.15	0.16	0.16	0	0.06	0.12	-0.01	-0.07	-0.11	-0.07	0.02	-0.0075	0.0205413	0.896864	21.7287	4.15749	-0.0103271	0.113263	0.113263	40.909	27.645	39.998	40.809	36.244	33.971	23.031	29.317	33.9905	0.85734	1	24.8753	10.5872	33.8497	3.77768	0.111602
Commd5:76730782.7	Commd5:76730782	Commd5	Proximal	chr15	76730782	76731735	0.17	0.15	0.3	0.16	0.11	0.07	0.08	0.18	0.1525	0	0.06	0.12	-0.01	-0.07	-0.11	-0.07	0.02	-0.0075	0.0205413	0.896864	21.7287	4.15749	-0.0103271	0.113263	0.113263	40.909	27.645	39.998	40.809	36.244	33.971	23.031	29.317	33.9905	0.85734	1	24.8753	10.5872	33.8497	3.77768	0.111602
Cryl1:57894399.1	Cryl1:57894399	Cryl1	Distal	chr14	57893832	57894399	0.27	0.36	0.29	0.21	0.23	0.36	0.44	0.58	0.3425	0.46	0.28	0.42	0.58	0.54	0.28	0.12	-0.16	0.315	0.00748316	0.789455	24.0313	10.7199	0.314705	0.220726	0.220726	2.064	2.135	2.967	3.11	2.779	2.581	2.555	2.391	2.57275	0.0121274	0.35719	21.6089	9.72373	2.61409	0.420765	0.16096
Cryl1:57894399.2	Cryl1:57894399	Cryl1	Proximal	chr14	57893871	57894399	0.73	0.64	0.71	0.79	0.77	0.64	0.56	0.42	0.6575	0.46	0.28	0.42	0.58	0.54	0.28	0.12	-0.16	0.315	0.00748316	0.789455	24.0313	10.7199	0.314705	0.220726	0.220726	2.064	2.135	2.967	3.11	2.779	2.581	2.555	2.391	2.57275	0.0121274	0.35719	21.6089	9.72373	2.61409	0.420765	0.16096
Ctbs:146126863.1	Ctbs:146126863	Ctbs	Distal	chr3	146126863	146131276	0.39	0.22	0.11	0.19	0.12	0.2	0.34	0.21	0.2225	-0.24	-0.02	0.5	0.29	0.34	0.14	-0.12	0.04	0.11625	0.0472559	1	20.3647	9.3868	0.156748	0.288821	0.288821	4.17	7.455	10.347	8.737	5.858	8.652	6.396	5.482	7.13713	0.453567	1	23.1733	8.71982	7.19892	1.97388	0.274192
Ctbs:146126863.3	Ctbs:146126863	Ctbs	Proximal	chr3	146126863	146128040	0.15	0.2	0.61	0.48	0.46	0.34	0.22	0.25	0.33875	-0.24	-0.02	0.5	0.29	0.34	0.14	-0.12	0.04	0.11625	0.0472559	1	20.3647	9.3868	0.156748	0.288821	0.288821	4.17	7.455	10.347	8.737	5.858	8.652	6.396	5.482	7.13713	0.453567	1	23.1733	8.71982	7.19892	1.97388	0.274192
D930014E17Rik:116855264.2	D930014E17Rik:116855264	D930014E17Rik	Distal	chr7	116855264	116855693	0.48	0.55	0.28	0.17	0.16	0.22	0.21	0.58	0.33125	-0.09	-0.23	0.38	0.6	0.62	0.41	0.48	-0.31	0.2325	0.0146225	0.889256	22.5532	11.5959	0.258528	0.442639	0.442639	13.96	12.013	12.636	18.59	13.823	12.729	11.835	10.842	13.3035	0.562138	1	21.4558	10.1431	13.5074	1.91671	0.141901
D930014E17Rik:116855264.3	D930014E17Rik:116855264	D930014E17Rik	Proximal	chr7	116855264	116855479	0.39	0.32	0.66	0.77	0.78	0.63	0.69	0.27	0.56375	-0.09	-0.23	0.38	0.6	0.62	0.41	0.48	-0.31	0.2325	0.0146225	0.889256	22.5532	11.5959	0.258528	0.442639	0.442639	13.96	12.013	12.636	18.59	13.823	12.729	11.835	10.842	13.3035	0.562138	1	21.4558	10.1431	13.5074	1.91671	0.141901
Ddi2:141241546.1	Ddi2:141241546	Ddi2	Distal	chr4	141233466	141241546	0.37	0.22	0.21	0.27	0.35	0.4	0.31	0.33	0.3075	0.08	0.33	0.4	0.24	0.06	0.04	0.16	0.19	0.1875	0.0496266	1	21.6667	5.45979	0.189691	0.204269	0.204269	21.574	24.454	27.44	21.932	20.089	21.478	24.056	19.979	22.6253	0.966212	1	20.8715	5.35388	22.6303	1.7992	0.0795038
Ddi2:141241546.4	Ddi2:141241546	Ddi2	Proximal	chr4	141239479	141241546	0.45	0.55	0.61	0.51	0.41	0.44	0.47	0.52	0.495	0.08	0.33	0.4	0.24	0.06	0.04	0.16	0.19	0.1875	0.0496266	1	21.6667	5.45979	0.189691	0.204269	0.204269	21.574	24.454	27.44	21.932	20.089	21.478	24.056	19.979	22.6253	0.966212	1	20.8715	5.35388	22.6303	1.7992	0.0795038
Ddx46:55780145.1	Ddx46:55780145	Ddx46	Distal	chr13	55780145	55782619	0.47	0.34	0.42	0.33	0.19	0.27	0.38	0.36	0.345	-0.33	-0.04	-0.12	0.06	0.43	0.11	-0.01	-0.05	0.00625	0.0423807	1	22.9647	12.3311	0.0147329	0.218681	0.218681	4.309	4.408	5.554	6.444	6.661	6.084	6.075	4.921	5.557	0.00020515	0.0530228	23.3904	11.9839	5.5827	1.06944	0.191564
Ddx46:55780145.4	Ddx46:55780145	Ddx46	Proximal	chr13	55780145	55780476	0.14	0.3	0.3	0.39	0.62	0.38	0.37	0.31	0.35125	-0.33	-0.04	-0.12	0.06	0.43	0.11	-0.01	-0.05	0.00625	0.0423807	1	22.9647	12.3311	0.0147329	0.218681	0.218681	4.309	4.408	5.554	6.444	6.661	6.084	6.075	4.921	5.557	0.00020515	0.0530228	23.3904	11.9839	5.5827	1.06944	0.191564
Ddx5:106645272.1	Ddx5:106645272	Ddx5	Distal	chr11	106645188	106645272	0.48	0.48	0.47	0.37	0.4	0.47	0.46	0.57	0.4625	0.04	0.04	0.06	0.26	0.2	0.06	0.08	-0.14	0.075	0.0412741	1	23.056	10.5827	0.0801393	0.127436	0.127436	262.225	225.306	235.885	276.713	300.828	321.389	321.204	245.873	273.678	0.00792444	0.290267	21.9887	14.7787	275.296	55.6476	0.202137
Ddx5:106645272.2	Ddx5:106645272	Ddx5	Proximal	chr11	106645234	106645272	0.52	0.52	0.53	0.63	0.6	0.53	0.54	0.43	0.5375	0.04	0.04	0.06	0.26	0.2	0.06	0.08	-0.14	0.075	0.0412741	1	23.056	10.5827	0.0801393	0.127436	0.127436	262.225	225.306	235.885	276.713	300.828	321.389	321.204	245.873	273.678	0.00792444	0.290267	21.9887	14.7787	275.296	55.6476	0.202137
Dhx36:62274669.1	Dhx36:62274669	Dhx36	Distal	chr3	62271937	62274669	0.39	0.38	0.25	0.22	0.32	0.2	0.47	0.42	0.33125	-0.09	-0.1	0.12	0.23	0.11	0.14	-0.29	-0.2	-0.01	0.0349217	1	21.4342	10.0128	0.0117496	0.203742	0.203742	5.515	8.712	8.023	10.278	9.399	7.975	11.076	8.451	8.67863	0.853525	1	24.3333	10.7905	8.66509	0.953173	0.110001
Dhx36:62274669.5	Dhx36:62274669	Dhx36	Proximal	chr3	62274326	62274669	0.3	0.28	0.37	0.45	0.43	0.34	0.18	0.22	0.32125	-0.09	-0.1	0.12	0.23	0.11	0.14	-0.29	-0.2	-0.01	0.0349217	1	21.4342	10.0128	0.0117496	0.203742	0.203742	5.515	8.712	8.023	10.278	9.399	7.975	11.076	8.451	8.67863	0.853525	1	24.3333	10.7905	8.66509	0.953173	0.110001
Dido1:180397288.1	Dido1:180397288	Dido1	Distal	chr2	180392669	180397288	0.3	0.35	0.26	0.32	0.42	0.6	0.55	0.5	0.4125	-0.11	0.17	0.28	0.19	0.03	-0.36	-0.29	-0.17	-0.0325	0.0194321	0.896864	22.1973	7.13049	-0.0198806	0.284803	0.284803	8.365	14.65	17.28	16.127	11.999	9.458	20.231	15.501	14.2014	0.992155	1	21.6667	5.84658	14.2891	4.0583	0.284014
Dido1:180397288.2	Dido1:180397288	Dido1	Proximal	chr2	180392821	180397288	0.19	0.52	0.54	0.51	0.45	0.24	0.26	0.33	0.38	-0.11	0.17	0.28	0.19	0.03	-0.36	-0.29	-0.17	-0.0325	0.0194321	0.896864	22.1973	7.13049	-0.0198806	0.284803	0.284803	8.365	14.65	17.28	16.127	11.999	9.458	20.231	15.501	14.2014	0.992155	1	21.6667	5.84658	14.2891	4.0583	0.284014
Dnajc30:135540076.6	Dnajc30:135540076	Dnajc30	Distal	chr5	135540076	135541418	0.49	0.38	0.39	0.36	0.23	0.28	0.25	0.33	0.33875	-0.33	-0.2	-0.12	-0.05	-0.02	-0.09	-0.15	-0.13	-0.13625	0.000265019	0.425225	23.8543	11.1051	-0.135628	0.101153	0.101153	113.675	101.789	77.483	86.722	56.54	71.763	53.892	74.836	79.5875	0.248996	1	26.4893	0.608332	80.7069	15.3147	0.189757
Dnajc30:135540076.7	Dnajc30:135540076	Dnajc30	Proximal	chr5	135540076	135541361	0.16	0.18	0.27	0.31	0.21	0.19	0.1	0.2	0.2025	-0.33	-0.2	-0.12	-0.05	-0.02	-0.09	-0.15	-0.13	-0.13625	0.000265019	0.425225	23.8543	11.1051	-0.135628	0.101153	0.101153	113.675	101.789	77.483	86.722	56.54	71.763	53.892	74.836	79.5875	0.248996	1	26.4893	0.608332	80.7069	15.3147	0.189757
Eapp:55774837.6	Eapp:55774837	Eapp	Distal	chr12	55774295	55774837	0.2	0.44	0.4	0.48	0.47	0.42	0.31	0.3	0.3775	-0.05	-0.2	-0.17	-0.27	-0.33	-0.16	-0.09	-0.07	-0.1675	0.0108759	0.806085	21.8843	21.7841	-0.177298	0.10995	0.10995	3.324	3.667	3.271	4.154	3.606	4.256	3.605	3.488	3.67137	0.800201	1	21.8978	12.1623	3.69316	0.27559	0.0746216
Eapp:55774837.7	Eapp:55774837	Eapp	Proximal	chr12	55774454	55774837	0.15	0.24	0.23	0.21	0.14	0.26	0.22	0.23	0.21	-0.05	-0.2	-0.17	-0.27	-0.33	-0.16	-0.09	-0.07	-0.1675	0.0108759	0.806085	21.8843	21.7841	-0.177298	0.10995	0.10995	3.324	3.667	3.271	4.154	3.606	4.256	3.605	3.488	3.67137	0.800201	1	21.8978	12.1623	3.69316	0.27559	0.0746216
Eif2c3:126022826.1	Eif2c3:126022826	Eif2c3	Distal	chr4	126008947	126022826	0.32	0.33	0.25	0.24	0.1	0.25	0.24	0.56	0.28625	-0.01	-0.15	0.21	0.13	0.47	0.23	0.09	-0.4	0.07125	0.0219853	0.896864	21.2601	13.0405	0.100187	0.344784	0.344784	#N/A	#N/A	#N/A	#N/A	#N/A	#N/A	#N/A	#N/A	#N/A	#N/A	#N/A	#N/A	#N/A	#N/A	#N/A	#N/A
Eif2c3:126022826.2	Eif2c3:126022826	Eif2c3	Proximal	chr4	126009976	126022826	0.31	0.18	0.46	0.37	0.57	0.48	0.33	0.16	0.3575	-0.01	-0.15	0.21	0.13	0.47	0.23	0.09	-0.4	0.07125	0.0219853	0.896864	21.2601	13.0405	0.100187	0.344784	0.344784	#N/A	#N/A	#N/A	#N/A	#N/A	#N/A	#N/A	#N/A	#N/A	#N/A	#N/A	#N/A	#N/A	#N/A	#N/A	#N/A
Epb4.1l4b:57076151.2	Epb4.1l4b:57076151	Epb4.1l4b	Distal	chr4	57074610	57076151	0.85	0.65	0.65	0.63	0.82	0.84	0.86	0.87	0.77125	-0.77	-0.35	-0.36	-0.3	-0.68	-0.72	-0.77	-0.79	-0.5925	0.037839	1	23.0371	7.62791	-0.585391	0.243845	0.243845	5.684	5.836	6.923	7.531	6.828	6.333	6.846	5.148	6.39112	0.0621438	0.794294	24.3622	10.0693	6.37761	0.878722	0.137782
Epb4.1l4b:57076151.3	Epb4.1l4b:57076151	Epb4.1l4b	Proximal	chr4	57075380	57076151	0.08	0.3	0.29	0.33	0.14	0.12	0.09	0.08	0.17875	-0.77	-0.35	-0.36	-0.3	-0.68	-0.72	-0.77	-0.79	-0.5925	0.037839	1	23.0371	7.62791	-0.585391	0.243845	0.243845	5.684	5.836	6.923	7.531	6.828	6.333	6.846	5.148	6.39112	0.0621438	0.794294	24.3622	10.0693	6.37761	0.878722	0.137782
Fam105b:27536216.2	Fam105b:27536216	Fam105b	Distal	chr15	27535698	27536216	0.64	0.63	0.48	0.35	0.49	0.75	0.77	0.79	0.6125	-0.29	-0.28	0.02	0.3	0.01	-0.52	-0.55	-0.59	-0.2375	0.000893661	0.670953	22.5047	9.09211	-0.217488	0.340108	0.340108	8.328	8.457	8.112	8.343	7.729	7.645	7.816	7.294	7.9655	0.738979	1	25.3333	4.40737	7.96519	0.091305	0.011463
Fam105b:27536216.3	Fam105b:27536216	Fam105b	Proximal	chr15	27535853	27536216	0.35	0.35	0.5	0.65	0.5	0.23	0.22	0.2	0.375	-0.29	-0.28	0.02	0.3	0.01	-0.52	-0.55	-0.59	-0.2375	0.000893661	0.670953	22.5047	9.09211	-0.217488	0.340108	0.340108	8.328	8.457	8.112	8.343	7.729	7.645	7.816	7.294	7.9655	0.738979	1	25.3333	4.40737	7.96519	0.091305	0.011463
Fam53b:139907685.3	Fam53b:139907685	Fam53b	Distal	chr7	139903767	139907685	0.37	0.47	0.51	0.62	0.66	0.47	0.49	0.35	0.4925	-0.2	-0.34	-0.35	-0.53	-0.57	-0.3	-0.4	-0.19	-0.36	0.0496525	1	23.0819	22.0968	-0.365972	0.152237	0.152237	#N/A	#N/A	#N/A	#N/A	#N/A	#N/A	#N/A	#N/A	#N/A	#N/A	#N/A	#N/A	#N/A	#N/A	#N/A	#N/A
Fam53b:139907685.4	Fam53b:139907685	Fam53b	Proximal	chr7	139904472	139907685	0.17	0.13	0.16	0.09	0.09	0.17	0.09	0.16	0.1325	-0.2	-0.34	-0.35	-0.53	-0.57	-0.3	-0.4	-0.19	-0.36	0.0496525	1	23.0819	22.0968	-0.365972	0.152237	0.152237	#N/A	#N/A	#N/A	#N/A	#N/A	#N/A	#N/A	#N/A	#N/A	#N/A	#N/A	#N/A	#N/A	#N/A	#N/A	#N/A
Fam63a:95099573.1	Fam63a:95099573	Fam63a	Distal	chr3	95099573	95100086	0.8	0.85	0.9	0.92	0.85	0.81	0.8	0.56	0.81125	-0.6	-0.7	-0.8	-0.84	-0.7	-0.62	-0.6	-0.12	-0.6225	0.00199819	0.670953	26.6604	22.3191	-0.599385	0.221483	0.221483	41.671	46.089	53.567	48.831	40.092	46.235	50.284	48.627	46.9245	0.986038	1	21.6667	5.61986	46.9988	4.87277	0.103678
Fam63a:95099573.2	Fam63a:95099573	Fam63a	Proximal	chr3	95099573	95099947	0.2	0.15	0.1	0.08	0.15	0.19	0.2	0.44	0.18875	-0.6	-0.7	-0.8	-0.84	-0.7	-0.62	-0.6	-0.12	-0.6225	0.00199819	0.670953	26.6604	22.3191	-0.599385	0.221483	0.221483	41.671	46.089	53.567	48.831	40.092	46.235	50.284	48.627	46.9245	0.986038	1	21.6667	5.61986	46.9988	4.87277	0.103678
Fbxo31:124076345.1	Fbxo31:124076345	Fbxo31	Distal	chr8	124073348	124076345	0.48	0.41	0.34	0.31	0.34	0.34	0.6	0.46	0.41	-0.22	-0.11	-0.01	0.21	0.15	-0.08	-0.37	-0.2	-0.07875	0.00398639	0.707086	21.5887	9.72615	-0.0565437	0.224191	0.224191	2.657	2.103	3.482	3.808	4.498	2.135	2.712	3.897	3.1615	0.930958	1	21.6667	9.06367	3.21915	0.640288	0.1989
Fbxo31:124076345.2	Fbxo31:124076345	Fbxo31	Proximal	chr8	124075874	124076345	0.26	0.3	0.33	0.52	0.49	0.26	0.23	0.26	0.33125	-0.22	-0.11	-0.01	0.21	0.15	-0.08	-0.37	-0.2	-0.07875	0.00398639	0.707086	21.5887	9.72615	-0.0565437	0.224191	0.224191	2.657	2.103	3.482	3.808	4.498	2.135	2.712	3.897	3.1615	0.930958	1	21.6667	9.06367	3.21915	0.640288	0.1989
Fbxo9:77929895.1	Fbxo9:77929895	Fbxo9	Distal	chr9	77929306	77929895	0.43	0.25	0.16	0.18	0.17	0.21	0.27	0.2	0.23375	0.06	0.28	0.63	0.57	0.6	0.43	0.37	0.43	0.42125	0.0420686	1	23.2033	10.0578	0.428053	0.201184	0.201184	14.873	15.509	20.496	18.88	20.096	16.209	18.975	19.828	18.1083	0.86854	1	24.3333	8.82477	18.0871	1.63944	0.0906415
Fbxo9:77929895.2	Fbxo9:77929895	Fbxo9	Proximal	chr9	77929336	77929895	0.49	0.53	0.79	0.75	0.77	0.64	0.64	0.63	0.655	0.06	0.28	0.63	0.57	0.6	0.43	0.37	0.43	0.42125	0.0420686	1	23.2033	10.0578	0.428053	0.201184	0.201184	14.873	15.509	20.496	18.88	20.096	16.209	18.975	19.828	18.1083	0.86854	1	24.3333	8.82477	18.0871	1.63944	0.0906415
Fcgr2b:172891231.2	Fcgr2b:172891231	Fcgr2b	Distal	chr1	172890689	172891231	0.11	0.19	0.04	0.09	0.06	0.3	0.33	0.46	0.1975	0.68	0.53	0.79	0.75	0.77	0.29	0.18	-0.04	0.49375	0.014388	0.887678	24.3124	9.57142	0.490593	0.243556	0.243556	27.602	22.459	24.818	27.154	28.249	25.653	25.567	23.917	25.6774	0.580253	1	21.6667	12.5825	25.8261	1.83582	0.0710837
Fcgr2b:172891231.3	Fcgr2b:172891231	Fcgr2b	Proximal	chr1	172890790	172891231	0.79	0.72	0.83	0.84	0.83	0.59	0.51	0.42	0.69125	0.68	0.53	0.79	0.75	0.77	0.29	0.18	-0.04	0.49375	0.014388	0.887678	24.3124	9.57142	0.490593	0.243556	0.243556	27.602	22.459	24.818	27.154	28.249	25.653	25.567	23.917	25.6774	0.580253	1	21.6667	12.5825	25.8261	1.83582	0.0710837
Gabpa:84860620.1	Gabpa:84860620	Gabpa	Distal	chr16	84860620	84864024	0.11	0.11	0.11	0.07	0.16	0.26	0.2	0.21	0.15375	0.17	0.37	0.41	0.34	0.18	-0.02	0.1	0.18	0.21625	0.0203467	0.896864	21.8562	5.91869	0.221117	0.213734	0.213734	9.438	10.812	11.667	12.809	12.614	8.976	11.716	10.3	11.0415	0.569277	1	20.6948	9.39491	11.2039	1.2584	0.112318
Gabpa:84860620.2	Gabpa:84860620	Gabpa	Proximal	chr16	84860620	84863889	0.28	0.48	0.52	0.41	0.34	0.24	0.3	0.39	0.37	0.17	0.37	0.41	0.34	0.18	-0.02	0.1	0.18	0.21625	0.0203467	0.896864	21.8562	5.91869	0.221117	0.213734	0.213734	9.438	10.812	11.667	12.809	12.614	8.976	11.716	10.3	11.0415	0.569277	1	20.6948	9.39491	11.2039	1.2584	0.112318
Gatad2b:90161791.1	Gatad2b:90161791	Gatad2b	Distal	chr3	90161791	90167325	0.25	0.2	0.16	0.19	0.19	0.14	0.23	0.32	0.21	-0.15	0	0.07	0.06	0	0.05	-0.08	-0.21	-0.0325	0.0222568	0.896864	24.8161	9.29307	-0.0365871	0.123249	0.123249	2.632	2.745	3.942	3.361	3.42	2.798	2.466	1.756	2.89	0.00988256	0.325677	24.6085	9.23131	2.87165	0.745758	0.259697
Gatad2b:90161791.7	Gatad2b:90161791	Gatad2b	Proximal	chr3	90161791	90162233	0.1	0.2	0.23	0.25	0.19	0.19	0.15	0.11	0.1775	-0.15	0	0.07	0.06	0	0.05	-0.08	-0.21	-0.0325	0.0222568	0.896864	24.8161	9.29307	-0.0365871	0.123249	0.123249	2.632	2.745	3.942	3.361	3.42	2.798	2.466	1.756	2.89	0.00988256	0.325677	24.6085	9.23131	2.87165	0.745758	0.259697
Glb1l:75196332.1	Glb1l:75196332	Glb1l	Distal	chr1	75192706	75196332	0.38	0.51	0.51	0.61	0.45	0.43	0.4	0.24	0.44125	-0.27	-0.43	-0.4	-0.54	-0.34	-0.33	-0.31	0.01	-0.32625	0.0360186	1	26.1252	22.0548	-0.313083	0.157318	0.157318	4.146	4.043	4.324	3.692	4.082	3.877	4.233	6.723	4.39	0.500623	1	25.3333	1.81755	4.43188	1.34496	0.303473
Glb1l:75196332.3	Glb1l:75196332	Glb1l	Proximal	chr1	75194109	75196332	0.11	0.08	0.11	0.07	0.11	0.1	0.09	0.25	0.115	-0.27	-0.43	-0.4	-0.54	-0.34	-0.33	-0.31	0.01	-0.32625	0.0360186	1	26.1252	22.0548	-0.313083	0.157318	0.157318	4.146	4.043	4.324	3.692	4.082	3.877	4.233	6.723	4.39	0.500623	1	25.3333	1.81755	4.43188	1.34496	0.303473
Gm4951:60405029.1	Gm4951:60405029	Gm4951	Distal	chr18	60405029	60408094	0.72	0.59	0.44	0.45	0.63	0.73	0.71	0.74	0.62625	-0.44	-0.18	0.12	0.1	-0.26	-0.46	-0.42	-0.48	-0.2525	0.0174466	0.896864	22.2368	7.52195	-0.236293	0.324566	0.324566	50.489	50.804	40.722	45.403	35.75	29.964	49.541	37.141	42.4768	0.644864	1	24.6117	0.801572	42.5809	5.07439	0.11917
Gm4951:60405029.2	Gm4951:60405029	Gm4951	Proximal	chr18	60405029	60407189	0.28	0.41	0.56	0.55	0.37	0.27	0.29	0.26	0.37375	-0.44	-0.18	0.12	0.1	-0.26	-0.46	-0.42	-0.48	-0.2525	0.0174466	0.896864	22.2368	7.52195	-0.236293	0.324566	0.324566	50.489	50.804	40.722	45.403	35.75	29.964	49.541	37.141	42.4768	0.644864	1	24.6117	0.801572	42.5809	5.07439	0.11917
Gm505:127426591.1	Gm505:127426591	Gm505	Distal	chr8	127426591	127430061	0.61	0.5	0.36	0.33	0.35	0.32	0.49	0.48	0.43	-0.39	-0.13	0.1	0.14	0.15	0.16	-0.19	-0.18	-0.0425	0.00499381	0.710856	24.447	11.2121	-0.0472781	0.254627	0.254627	2.925	4.092	4.05	2.858	5.183	5.181	2.898	4.471	3.95725	0.995935	1	24.9855	13.7347	3.945	0.42515	0.107769
Gm505:127426591.2	Gm505:127426591	Gm505	Proximal	chr8	127426591	127429994	0.22	0.37	0.46	0.47	0.5	0.48	0.3	0.3	0.3875	-0.39	-0.13	0.1	0.14	0.15	0.16	-0.19	-0.18	-0.0425	0.00499381	0.710856	24.447	11.2121	-0.0472781	0.254627	0.254627	2.925	4.092	4.05	2.858	5.183	5.181	2.898	4.471	3.95725	0.995935	1	24.9855	13.7347	3.945	0.42515	0.107769
Hdac11:91123043.1	Hdac11:91123043	Hdac11	Distal	chr6	91123043	91124686	0.47	0.54	0.61	0.53	0.44	0.42	0.44	0.48	0.49125	0.06	-0.08	-0.22	-0.06	0.12	0.16	0.12	0.04	0.0175	0.00706645	0.789455	21.7287	16.4848	0.0145512	0.193192	0.193192	14.456	15.735	23.189	19.467	17.993	12.819	12.847	12.001	16.0634	0.017195	0.432611	22.2848	8.43507	16.32	4.21375	0.258195
Hdac11:91123043.2	Hdac11:91123043	Hdac11	Proximal	chr6	91123043	91123300	0.53	0.46	0.39	0.47	0.56	0.58	0.56	0.52	0.50875	0.06	-0.08	-0.22	-0.06	0.12	0.16	0.12	0.04	0.0175	0.00706645	0.789455	21.7287	16.4848	0.0145512	0.193192	0.193192	14.456	15.735	23.189	19.467	17.993	12.819	12.847	12.001	16.0634	0.017195	0.432611	22.2848	8.43507	16.32	4.21375	0.258195
Hgfac:35390806.1	Hgfac:35390806	Hgfac	Distal	chr5	35390806	35391093	0.53	0.3	0.17	0.2	0.09	0.15	0.14	0.27	0.23125	-0.06	0.4	0.66	0.6	0.82	0.7	0.72	0.46	0.5375	0.0184429	0.896864	25.3333	12.7476	0.524349	0.273793	0.273793	125.427	118.153	129.175	108.352	111.197	129.026	85.128	121.296	115.969	0.999562	1	25.3333	2.47154	116.088	5.14871	0.0443517
Hgfac:35390806.2	Hgfac:35390806	Hgfac	Proximal	chr5	35390806	35391058	0.47	0.7	0.83	0.8	0.91	0.85	0.86	0.73	0.76875	-0.06	0.4	0.66	0.6	0.82	0.7	0.72	0.46	0.5375	0.0184429	0.896864	25.3333	12.7476	0.524349	0.273793	0.273793	125.427	118.153	129.175	108.352	111.197	129.026	85.128	121.296	115.969	0.999562	1	25.3333	2.47154	116.088	5.14871	0.0443517
Hsd11b1:195048422.2	Hsd11b1:195048422	Hsd11b1	Distal	chr1	195047883	195048422	0.4	0.37	0.24	0.41	0.27	0.43	0.5	0.44	0.3825	-0.04	0.02	0.29	0.08	0.26	0.01	-0.25	-0.12	0.03125	0.0370271	1	21.7409	9.14979	0.0470642	0.17919	0.17919	224.567	193.754	189.593	187.723	225.495	224.37	230.469	220.649	212.077	0.234134	1	21.9219	17.3079	211.236	25.7365	0.121837
Hsd11b1:195048422.4	Hsd11b1:195048422	Hsd11b1	Proximal	chr1	195048030	195048422	0.36	0.39	0.53	0.49	0.53	0.44	0.25	0.32	0.41375	-0.04	0.02	0.29	0.08	0.26	0.01	-0.25	-0.12	0.03125	0.0370271	1	21.7409	9.14979	0.0470642	0.17919	0.17919	224.567	193.754	189.593	187.723	225.495	224.37	230.469	220.649	212.077	0.234134	1	21.9219	17.3079	211.236	25.7365	0.121837
Hspa4:53075317.1	Hspa4:53075317	Hspa4	Distal	chr11	53073316	53075317	0.36	0.12	0.15	0.14	0.14	0.31	0.47	0.6	0.28625	-0.01	0.26	0.46	0.44	0.28	0.02	-0.25	-0.48	0.09	6.86397e-05	0.292199	24.7677	8.86163	0.0791029	0.364035	0.364035	10.998	15.156	11.523	14.608	12.64	15.765	12.633	11.553	13.1095	0.968462	1	23.9855	12.2332	13.1101	1.16395	0.0887827
Hspa4:53075317.4	Hspa4:53075317	Hspa4	Proximal	chr11	53075073	53075317	0.35	0.38	0.61	0.58	0.42	0.33	0.22	0.12	0.37625	-0.01	0.26	0.46	0.44	0.28	0.02	-0.25	-0.48	0.09	6.86397e-05	0.292199	24.7677	8.86163	0.0791029	0.364035	0.364035	10.998	15.156	11.523	14.608	12.64	15.765	12.633	11.553	13.1095	0.968462	1	23.9855	12.2332	13.1101	1.16395	0.0887827
Iars2:187111070.2	Iars2:187111070	Iars2	Distal	chr1	187110538	187111070	0.23	0.14	0.1	0.13	0.1	0.14	0.24	0.19	0.15875	0.46	0.66	0.74	0.7	0.74	0.67	0.48	0.54	0.62375	0.0211847	0.896864	21.9997	9.1696	0.634415	0.135446	0.135446	9.167	13.698	12.045	13.133	14.686	14.161	11.18	10.485	12.3194	0.108447	1	24.5602	11.5524	12.2713	2.08586	0.169978
Iars2:187111070.3	Iars2:187111070	Iars2	Proximal	chr1	187110580	187111070	0.69	0.8	0.84	0.83	0.84	0.81	0.72	0.73	0.7825	0.46	0.66	0.74	0.7	0.74	0.67	0.48	0.54	0.62375	0.0211847	0.896864	21.9997	9.1696	0.634415	0.135446	0.135446	9.167	13.698	12.045	13.133	14.686	14.161	11.18	10.485	12.3194	0.108447	1	24.5602	11.5524	12.2713	2.08586	0.169978
Ifi35:101319515.1	Ifi35:101319515	Ifi35	Distal	chr11	101319515	101320505	0.78	0.77	0.87	0.83	0.83	0.78	0.03	0.04	0.61625	-0.68	-0.67	-0.83	-0.75	-0.75	-0.67	0.56	0.77	-0.3775	0.0244334	0.922165	24.4113	21.532	-0.369231	0.493113	0.493113	8.424	9.323	7.173	5.817	9.553	9.949	7.436	10.186	8.48263	0.972649	1	23.0799	17.9463	8.4634	1.10925	0.131064
Ifi35:101319515.4	Ifi35:101319515	Ifi35	Proximal	chr11	101319515	101319778	0.1	0.1	0.04	0.08	0.08	0.11	0.59	0.81	0.23875	-0.68	-0.67	-0.83	-0.75	-0.75	-0.67	0.56	0.77	-0.3775	0.0244334	0.922165	24.4113	21.532	-0.369231	0.493113	0.493113	8.424	9.323	7.173	5.817	9.553	9.949	7.436	10.186	8.48263	0.972649	1	23.0799	17.9463	8.4634	1.10925	0.131064
Ift46:44598568.1	Ift46:44598568	Ift46	Distal	chr9	44598568	44601461	0.13	0.11	0.03	0.06	0.13	0.15	0.18	0.13	0.115	0.74	0.78	0.94	0.88	0.74	0.7	0.64	0.74	0.77	0.0179675	0.896864	21.7919	7.1823	0.77656	0.121946	0.121946	6.51	11.191	14.574	13.698	12.055	8.442	13.472	7.336	10.9097	0.589792	1	25.4226	8.67655	10.7321	3.27094	0.304782
Ift46:44598568.2	Ift46:44598568	Ift46	Proximal	chr9	44598568	44598976	0.87	0.89	0.97	0.94	0.87	0.85	0.82	0.87	0.885	0.74	0.78	0.94	0.88	0.74	0.7	0.64	0.74	0.77	0.0179675	0.896864	21.7919	7.1823	0.77656	0.121946	0.121946	6.51	11.191	14.574	13.698	12.055	8.442	13.472	7.336	10.9097	0.589792	1	25.4226	8.67655	10.7321	3.27094	0.304782
Igfbp7:77778524.6	Igfbp7:77778524	Igfbp7	Distal	chr5	77778270	77778524	0.78	0.82	0.88	0.95	0.89	0.92	0.85	0.81	0.8625	-0.58	-0.66	-0.78	-0.92	-0.79	-0.86	-0.72	-0.64	-0.74375	0.00180751	0.670953	25.4226	23.0994	-0.735089	0.143578	0.143578	8.755	6	4.642	6.011	6.373	5.375	5.125	5.408	5.96113	0.924652	1	25.3333	9.18587	6.00024	0.72949	0.121577
Igfbp7:77778524.7	Igfbp7:77778524	Igfbp7	Proximal	chr5	77778345	77778524	0.2	0.16	0.1	0.03	0.1	0.06	0.13	0.17	0.11875	-0.58	-0.66	-0.78	-0.92	-0.79	-0.86	-0.72	-0.64	-0.74375	0.00180751	0.670953	25.4226	23.0994	-0.735089	0.143578	0.143578	8.755	6	4.642	6.011	6.373	5.375	5.125	5.408	5.96113	0.924652	1	25.3333	9.18587	6.00024	0.72949	0.121577
Inhbe:126788067.1	Inhbe:126788067	Inhbe	Distal	chr10	126785913	126788067	0.7	0.73	0.77	0.88	0.87	0.87	0.85	0.82	0.81125	-0.4	-0.46	-0.54	-0.76	-0.74	-0.74	-0.7	-0.64	-0.6225	0.00344448	0.707086	23.9813	0.813292	-0.622588	0.133333	0.133333	58.115	28.398	61.432	46.632	95.859	81.086	38.942	29.55	55.0018	0.189354	1	21.6667	13.0218	57.1283	29.0195	0.507972
Inhbe:126788067.2	Inhbe:126788067	Inhbe	Proximal	chr10	126786702	126788067	0.3	0.27	0.23	0.12	0.13	0.13	0.15	0.18	0.18875	-0.4	-0.46	-0.54	-0.76	-0.74	-0.74	-0.7	-0.64	-0.6225	0.00344448	0.707086	23.9813	0.813292	-0.622588	0.133333	0.133333	58.115	28.398	61.432	46.632	95.859	81.086	38.942	29.55	55.0018	0.189354	1	21.6667	13.0218	57.1283	29.0195	0.507972
Itm2c:87804122.1	Itm2c:87804122	Itm2c	Distal	chr1	87804122	87805277	0.27	0.17	0.14	0.19	0.18	0.25	0.33	0.44	0.24625	0.35	0.57	0.49	0.56	0.57	0.4	0.23	0.06	0.40375	0.0133261	0.851553	25.9688	9.31698	0.388614	0.189933	0.189933	11.241	12.356	12.91	12.974	9.454	11.995	8.585	10.613	11.266	0.625883	1	23.8198	7.34195	11.2721	1.17337	0.104095
Itm2c:87804122.2	Itm2c:87804122	Itm2c	Proximal	chr1	87804122	87805223	0.62	0.74	0.63	0.75	0.75	0.65	0.56	0.5	0.65	0.35	0.57	0.49	0.56	0.57	0.4	0.23	0.06	0.40375	0.0133261	0.851553	25.9688	9.31698	0.388614	0.189933	0.189933	11.241	12.356	12.91	12.974	9.454	11.995	8.585	10.613	11.266	0.625883	1	23.8198	7.34195	11.2721	1.17337	0.104095
Kif1c:70541704.1	Kif1c:70541704	Kif1c	Distal	chr11	70541704	70545466	0.37	0.34	0.12	0.07	0.26	0.31	0.49	0.4	0.295	-0.1	0.07	0.43	0.37	0.18	0.23	-0.23	0.01	0.12	0.0206263	0.896864	20.6867	8.38972	0.149917	0.272463	0.272463	8.331	11.895	14.318	12.975	11.34	11.117	9.79	10.274	11.255	0.0287536	0.550124	20.7952	7.32222	11.4533	2.60326	0.227293
Kif1c:70541704.2	Kif1c:70541704	Kif1c	Proximal	chr11	70541704	70543928	0.27	0.41	0.55	0.44	0.44	0.54	0.26	0.41	0.415	-0.1	0.07	0.43	0.37	0.18	0.23	-0.23	0.01	0.12	0.0206263	0.896864	20.6867	8.38972	0.149917	0.272463	0.272463	8.331	11.895	14.318	12.975	11.34	11.117	9.79	10.274	11.255	0.0287536	0.550124	20.7952	7.32222	11.4533	2.60326	0.227293
Klf10:38225919.1	Klf10:38225919	Klf10	Distal	chr15	38224168	38225919	0.7	0.75	0.84	0.82	0.83	0.83	0.73	0.65	0.76875	-0.5	-0.62	-0.75	-0.69	-0.72	-0.73	-0.54	-0.47	-0.6275	0.0207208	0.896864	25.451	22.4963	-0.619027	0.139963	0.139963	14.297	11.367	15.794	27.226	24.197	21.512	11.888	10.317	17.0748	0.00269009	0.172724	20.4558	11.5401	18.1634	7.87637	0.433639
Klf10:38225919.3	Klf10:38225919	Klf10	Proximal	chr15	38225614	38225919	0.2	0.13	0.09	0.13	0.11	0.1	0.19	0.18	0.14125	-0.5	-0.62	-0.75	-0.69	-0.72	-0.73	-0.54	-0.47	-0.6275	0.0207208	0.896864	25.451	22.4963	-0.619027	0.139963	0.139963	14.297	11.367	15.794	27.226	24.197	21.512	11.888	10.317	17.0748	0.00269009	0.172724	20.4558	11.5401	18.1634	7.87637	0.433639
Klf15:90424114.1	Klf15:90424114	Klf15	Distal	chr6	90424114	90425155	0.42	0.17	0.28	0.58	0.61	0.68	0.73	0.4	0.48375	0.16	0.66	0.44	-0.16	-0.22	-0.36	-0.46	0.2	0.0325	0.0314427	1	22.3435	3.33446	0.017085	0.509003	0.509003	61.582	49.244	69.601	104.201	107.98	68.54	67.384	74.195	75.3409	0.23965	1	21.7447	10.8783	77.2322	19.9704	0.258576
Klf15:90424114.2	Klf15:90424114	Klf15	Proximal	chr6	90424114	90425090	0.58	0.83	0.72	0.42	0.39	0.32	0.27	0.6	0.51625	0.16	0.66	0.44	-0.16	-0.22	-0.36	-0.46	0.2	0.0325	0.0314427	1	22.3435	3.33446	0.017085	0.509003	0.509003	61.582	49.244	69.601	104.201	107.98	68.54	67.384	74.195	75.3409	0.23965	1	21.7447	10.8783	77.2322	19.9704	0.258576
Krr1:111421595.3	Krr1:111421595	Krr1	Distal	chr10	111421595	111423179	0.36	0.32	0.27	0.27	0.27	0.35	0.41	0.36	0.32625	0.04	0.16	0.17	0.25	0.31	0.09	0.03	0.04	0.13625	0.00606496	0.759369	21.3633	9.7471	0.149051	0.118545	0.118545	7.932	8.128	5.764	11.125	11.127	9.189	9.527	8.268	8.8825	0.52203	1	22.7919	12.6387	8.94852	1.54051	0.172152
Krr1:111421595.4	Krr1:111421595	Krr1	Proximal	chr10	111421595	111423151	0.4	0.48	0.44	0.52	0.58	0.44	0.44	0.4	0.4625	0.04	0.16	0.17	0.25	0.31	0.09	0.03	0.04	0.13625	0.00606496	0.759369	21.3633	9.7471	0.149051	0.118545	0.118545	7.932	8.128	5.764	11.125	11.127	9.189	9.527	8.268	8.8825	0.52203	1	22.7919	12.6387	8.94852	1.54051	0.172152
Lcp1:75629013.1	Lcp1:75629013	Lcp1	Distal	chr14	75629013	75630657	0.24	0.21	0.09	0.15	0.19	0.16	0.23	0.27	0.1925	0.49	0.54	0.81	0.69	0.59	0.66	0.5	0.4	0.585	0.0406002	1	24.46	9.12848	0.582368	0.142804	0.142804	6.757	7.17	8.685	8.72	8.481	7.671	7.031	5.895	7.55125	5.40541e-05	0.031538	24.7966	9.98003	7.50766	1.29534	0.172536
Lcp1:75629013.2	Lcp1:75629013	Lcp1	Proximal	chr14	75629013	75630630	0.73	0.75	0.9	0.84	0.78	0.82	0.73	0.67	0.7775	0.49	0.54	0.81	0.69	0.59	0.66	0.5	0.4	0.585	0.0406002	1	24.46	9.12848	0.582368	0.142804	0.142804	6.757	7.17	8.685	8.72	8.481	7.671	7.031	5.895	7.55125	5.40541e-05	0.031538	24.7966	9.98003	7.50766	1.29534	0.172536
Leap2:53235951.1	Leap2:53235951	Leap2	Distal	chr11	53235683	53235951	0.21	0.15	0.12	0.15	0.07	0.24	0.38	0.55	0.23375	0.58	0.7	0.76	0.7	0.86	0.52	0.24	-0.1	0.5325	0.00927243	0.789455	25.3333	10.1359	0.516089	0.291139	0.291139	154.294	124.686	122.896	100.517	126.513	172.844	212.561	156.415	146.341	0.0273891	0.53802	22.2697	18.6301	144.382	40.2423	0.278721
Leap2:53235951.2	Leap2:53235951	Leap2	Proximal	chr11	53235783	53235951	0.79	0.85	0.88	0.85	0.93	0.76	0.62	0.45	0.76625	0.58	0.7	0.76	0.7	0.86	0.52	0.24	-0.1	0.5325	0.00927243	0.789455	25.3333	10.1359	0.516089	0.291139	0.291139	154.294	124.686	122.896	100.517	126.513	172.844	212.561	156.415	146.341	0.0273891	0.53802	22.2697	18.6301	144.382	40.2423	0.278721
Lsm14a:35130977.2	Lsm14a:35130977	Lsm14a	Distal	chr7	35129665	35130977	0.21	0.21	0.22	0.09	0.19	0.17	0.21	0.13	0.17875	0.14	0.18	0.18	0.27	0.33	0.26	0.28	0.08	0.215	0.0405822	1	21.5532	12.5448	0.223687	0.101857	0.101857	4.216	4.895	5.039	5.241	6.031	5.339	4.947	4.166	4.98425	0.000834604	0.101247	23.1733	11.7495	5.00922	0.749261	0.149576
Lsm14a:35130977.3	Lsm14a:35130977	Lsm14a	Proximal	chr7	35129738	35130977	0.35	0.39	0.4	0.36	0.52	0.43	0.49	0.21	0.39375	0.14	0.18	0.18	0.27	0.33	0.26	0.28	0.08	0.215	0.0405822	1	21.5532	12.5448	0.223687	0.101857	0.101857	4.216	4.895	5.039	5.241	6.031	5.339	4.947	4.166	4.98425	0.000834604	0.101247	23.1733	11.7495	5.00922	0.749261	0.149576
Lyn:3716889.10	Lyn:3716889	Lyn	Proximal	chr4	3716889	3717916	0.21	0.33	0.3	0.35	0.35	0.23	0.08	0.15	0.25	0.08	0.2	0.18	0.21	0.17	0.09	-0.13	-0.05	0.09375	0.0177661	0.896864	24.2714	8.59477	0.0925529	0.117193	0.117193	2.597	2.808	2.374	2.418	2.797	3.822	2.71	2.303	2.72863	0.850836	1	21.6667	14.96	2.74489	0.603096	0.219716
Lyn:3716889.8	Lyn:3716889	Lyn	Distal	chr4	3716889	3718224	0.13	0.13	0.12	0.14	0.18	0.14	0.21	0.2	0.15625	0.08	0.2	0.18	0.21	0.17	0.09	-0.13	-0.05	0.09375	0.0177661	0.896864	24.2714	8.59477	0.0925529	0.117193	0.117193	2.597	2.808	2.374	2.418	2.797	3.822	2.71	2.303	2.72863	0.850836	1	21.6667	14.96	2.74489	0.603096	0.219716
Magi1:93628996.1	Magi1:93628996	Magi1	Distal	chr6	93625447	93628996	0.35	0.33	0.34	0.32	0.16	0.33	0.45	0.49	0.34625	-0.1	-0.05	-0.1	-0.03	0.01	-0.06	-0.28	-0.33	-0.1175	0.035275	1	24.3124	10.7977	-0.119007	0.113269	0.113269	1.222	1.31	1.273	1	1.01	1.031	1.278	1	1.1405	0.900585	1	23.0819	1.17038	1.13773	0.0857744	0.0753911
Magi1:93628996.4	Magi1:93628996	Magi1	Proximal	chr6	93626621	93628996	0.25	0.28	0.24	0.29	0.17	0.27	0.17	0.16	0.22875	-0.1	-0.05	-0.1	-0.03	0.01	-0.06	-0.28	-0.33	-0.1175	0.035275	1	24.3124	10.7977	-0.119007	0.113269	0.113269	1.222	1.31	1.273	1	1.01	1.031	1.278	1	1.1405	0.900585	1	23.0819	1.17038	1.13773	0.0857744	0.0753911
Mkln1:31457625.5	Mkln1:31457625	Mkln1	Distal	chr6	31457625	31458849	0.27	0.14	0.15	0.08	0.1	0.08	0.05	0.15	0.1275	0.14	0.39	0.49	0.66	0.64	0.49	0.55	0.48	0.48	0.0135119	0.851553	24.2426	11.0305	0.478376	0.158157	0.158157	2.883	3.438	4.62	5.134	5.08	4.371	4.586	3.8	4.239	0.00270663	0.172724	23.6627	10.1686	4.25204	0.907389	0.213401
Mkln1:31457625.6	Mkln1:31457625	Mkln1	Proximal	chr6	31457625	31457970	0.41	0.53	0.64	0.74	0.74	0.57	0.6	0.63	0.6075	0.14	0.39	0.49	0.66	0.64	0.49	0.55	0.48	0.48	0.0135119	0.851553	24.2426	11.0305	0.478376	0.158157	0.158157	2.883	3.438	4.62	5.134	5.08	4.371	4.586	3.8	4.239	0.00270663	0.172724	23.6627	10.1686	4.25204	0.907389	0.213401
Mknk2:80130077.2	Mknk2:80130077	Mknk2	Distal	chr10	80128033	80130077	0.38	0.36	0.21	0.23	0.2	0.24	0.3	0.3	0.2775	0.15	0.12	0.49	0.5	0.57	0.43	0.32	0.34	0.365	0.0117147	0.806085	22.8712	10.694	0.373499	0.176594	0.176594	15.795	18.786	31.191	49.804	56.722	40.224	31.301	29.197	34.1275	6.40677e-05	0.0330632	22.8358	11.9692	34.89	16.6885	0.478317
Mknk2:80130077.3	Mknk2:80130077	Mknk2	Proximal	chr10	80128070	80130077	0.53	0.48	0.7	0.73	0.77	0.67	0.62	0.64	0.6425	0.15	0.12	0.49	0.5	0.57	0.43	0.32	0.34	0.365	0.0117147	0.806085	22.8712	10.694	0.373499	0.176594	0.176594	15.795	18.786	31.191	49.804	56.722	40.224	31.301	29.197	34.1275	6.40677e-05	0.0330632	22.8358	11.9692	34.89	16.6885	0.478317
Mobkl1b:83290170.1	Mobkl1b:83290170	Mobkl1b	Distal	chr6	83290170	83293770	0.19	0.09	0.1	0.09	0.12	0.15	0.26	0.16	0.145	0.42	0.57	0.67	0.59	0.59	0.38	0.28	0.44	0.4925	0.0119294	0.806085	22.1264	7.63793	0.501263	0.160262	0.160262	#N/A	#N/A	#N/A	#N/A	#N/A	#N/A	#N/A	#N/A	#N/A	#N/A	#N/A	#N/A	#N/A	#N/A	#N/A	#N/A
Mobkl1b:83290170.2	Mobkl1b:83290170	Mobkl1b	Proximal	chr6	83290170	83293690	0.61	0.66	0.77	0.68	0.71	0.53	0.54	0.6	0.6375	0.42	0.57	0.67	0.59	0.59	0.38	0.28	0.44	0.4925	0.0119294	0.806085	22.1264	7.63793	0.501263	0.160262	0.160262	#N/A	#N/A	#N/A	#N/A	#N/A	#N/A	#N/A	#N/A	#N/A	#N/A	#N/A	#N/A	#N/A	#N/A	#N/A	#N/A
Mrpl17:112958658.2	Mrpl17:112958658	Mrpl17	Distal	chr7	112958095	112958658	0.2	0.17	0.12	0.11	0.24	0.52	0.28	0.21	0.23125	0.53	0.6	0.68	0.67	0.46	-0.06	0.32	0.53	0.46625	0.0468111	1	21.7287	6.1314	0.474387	0.280216	0.280216	18.747	23.545	21.665	29.683	21.305	28.026	16.673	21.273	22.6146	0.571989	1	21.3313	10.1379	22.9908	3.37864	0.146956
Mrpl17:112958658.3	Mrpl17:112958658	Mrpl17	Proximal	chr7	112958194	112958658	0.73	0.77	0.8	0.78	0.7	0.46	0.6	0.74	0.6975	0.53	0.6	0.68	0.67	0.46	-0.06	0.32	0.53	0.46625	0.0468111	1	21.7287	6.1314	0.474387	0.280216	0.280216	18.747	23.545	21.665	29.683	21.305	28.026	16.673	21.273	22.6146	0.571989	1	21.3313	10.1379	22.9908	3.37864	0.146956
Mrps5:127429365.1	Mrps5:127429365	Mrps5	Distal	chr2	127429365	127432565	0.25	0.33	0.16	0.34	0.54	0.43	0.42	0.32	0.34875	0	-0.06	-0.08	-0.26	-0.38	-0.13	-0.26	0.05	-0.14	0.0312929	1	21.7152	0.932801	-0.15415	0.157519	0.157519	4.711	5.06	5.262	7.297	5.379	5.563	5.28	5.892	5.5555	0.844061	1	21.6667	9.65616	5.61169	0.588275	0.10483
Mrps5:127429365.2	Mrps5:127429365	Mrps5	Proximal	chr2	127429365	127432108	0.25	0.27	0.08	0.08	0.16	0.3	0.16	0.37	0.20875	0	-0.06	-0.08	-0.26	-0.38	-0.13	-0.26	0.05	-0.14	0.0312929	1	21.7152	0.932801	-0.15415	0.157519	0.157519	4.711	5.06	5.262	7.297	5.379	5.563	5.28	5.892	5.5555	0.844061	1	21.6667	9.65616	5.61169	0.588275	0.10483
Mrps7:115468132.1	Mrps7:115468132	Mrps7	Distal	chr11	115468132	115468922	0.27	0.23	0.15	0.13	0.24	0.24	0.23	0.18	0.20875	0.22	0.37	0.52	0.54	0.38	0.3	0.21	0.36	0.3625	0.0041712	0.710272	21.6667	8.251	0.374735	0.156363	0.156363	96.335	81.906	77.316	84.546	85.792	91.004	69.69	88.103	84.3365	0.997528	1	24.0313	18.2952	84.3397	5.35793	0.0635279
Mrps7:115468132.4	Mrps7:115468132	Mrps7	Proximal	chr11	115468132	115468628	0.49	0.6	0.67	0.67	0.62	0.54	0.44	0.54	0.57125	0.22	0.37	0.52	0.54	0.38	0.3	0.21	0.36	0.3625	0.0041712	0.710272	21.6667	8.251	0.374735	0.156363	0.156363	96.335	81.906	77.316	84.546	85.792	91.004	69.69	88.103	84.3365	0.997528	1	24.0313	18.2952	84.3397	5.35793	0.0635279
Mrrf:36044595.5	Mrrf:36044595	Mrrf	Distal	chr2	36044595	36045804	0.17	0.14	0.05	0.06	0.15	0.2	0.15	0.09	0.12625	0.56	0.58	0.84	0.79	0.57	0.43	0.35	0.61	0.59125	0.0345093	1	21.6667	7.4341	0.603228	0.193079	0.193079	2.091	2.394	2.327	2.117	1.767	2.042	1.884	1.99	2.0765	0.489467	1	23.6543	4.48009	2.0764	0.246966	0.11894
Mrrf:36044595.6	Mrrf:36044595	Mrrf	Proximal	chr2	36044595	36045116	0.73	0.72	0.89	0.85	0.72	0.63	0.5	0.7	0.7175	0.56	0.58	0.84	0.79	0.57	0.43	0.35	0.61	0.59125	0.0345093	1	21.6667	7.4341	0.603228	0.193079	0.193079	2.091	2.394	2.327	2.117	1.767	2.042	1.884	1.99	2.0765	0.489467	1	23.6543	4.48009	2.0764	0.246966	0.11894
Mtmr7:41637267.1	Mtmr7:41637267	Mtmr7	Distal	chr8	41633428	41637267	0.05	0.06	0.86	0.9	0.83	0.81	0.84	0.05	0.55	0.57	0.21	-0.83	-0.87	-0.8	-0.77	-0.8	0.43	-0.3575	0.0223765	0.896864	23.6627	21.7824	-0.367504	0.700748	0.700748	#N/A	#N/A	#N/A	#N/A	#N/A	#N/A	#N/A	#N/A	#N/A	#N/A	#N/A	#N/A	#N/A	#N/A	#N/A	#N/A
Mtmr7:41637267.5	Mtmr7:41637267	Mtmr7	Proximal	chr8	41636453	41637267	0.62	0.27	0.03	0.03	0.03	0.04	0.04	0.48	0.1925	0.57	0.21	-0.83	-0.87	-0.8	-0.77	-0.8	0.43	-0.3575	0.0223765	0.896864	23.6627	21.7824	-0.367504	0.700748	0.700748	#N/A	#N/A	#N/A	#N/A	#N/A	#N/A	#N/A	#N/A	#N/A	#N/A	#N/A	#N/A	#N/A	#N/A	#N/A	#N/A
N4bp2l1:151396012.1	N4bp2l1:151396012	N4bp2l1	Distal	chr5	151394327	151396012	0.46	0.53	0.37	0.71	0.72	0.64	0.56	0.29	0.535	0.08	-0.06	0.26	-0.42	-0.44	-0.28	-0.12	0.42	-0.07	0.0340526	1	20.3647	2.27559	-0.115043	0.36751	0.36751	9.849	9.926	14.921	27.885	25.595	16.385	17.606	17.9	17.5084	0.155459	1	22.9232	11.2205	17.7886	6.21472	0.349365
N4bp2l1:151396012.2	N4bp2l1:151396012	N4bp2l1	Proximal	chr5	151394420	151396012	0.54	0.47	0.63	0.29	0.28	0.36	0.44	0.71	0.465	0.08	-0.06	0.26	-0.42	-0.44	-0.28	-0.12	0.42	-0.07	0.0340526	1	20.3647	2.27559	-0.115043	0.36751	0.36751	9.849	9.926	14.921	27.885	25.595	16.385	17.606	17.9	17.5084	0.155459	1	22.9232	11.2205	17.7886	6.21472	0.349365
N4bp2l2:151445890.7	N4bp2l2:151445890	N4bp2l2	Distal	chr5	151445526	151445890	0.71	0.82	0.81	0.74	0.64	0.58	0.71	0.8	0.72625	-0.61	-0.77	-0.74	-0.65	-0.46	-0.4	-0.58	-0.75	-0.62	0.0215544	0.896864	21.6667	14.5786	-0.611651	0.224114	0.224114	14.564	15.401	12.719	14.822	13.749	14.592	18.914	15.323	15.0105	0.85682	1	22.8198	20.2915	14.957	1.17611	0.0786324
N4bp2l2:151445890.8	N4bp2l2:151445890	N4bp2l2	Proximal	chr5	151445585	151445890	0.1	0.05	0.07	0.09	0.18	0.18	0.13	0.05	0.10625	-0.61	-0.77	-0.74	-0.65	-0.46	-0.4	-0.58	-0.75	-0.62	0.0215544	0.896864	21.6667	14.5786	-0.611651	0.224114	0.224114	14.564	15.401	12.719	14.822	13.749	14.592	18.914	15.323	15.0105	0.85682	1	22.8198	20.2915	14.957	1.17611	0.0786324
Naa25:121889837.11	Naa25:121889837	Naa25	Distal	chr5	121889837	121890301	0.5	0.53	0.48	0.35	0.25	0.33	0.28	0.44	0.395	-0.42	-0.47	-0.34	-0.25	-0.12	-0.16	-0.12	-0.39	-0.28375	0.0350856	1	22.3236	13.5995	-0.275929	0.170578	0.170578	3.744	3.768	4.347	4.128	4.131	3.948	4.151	4.232	4.05613	0.902434	1	24.3333	8.6601	4.05423	0.150049	0.0370105
Naa25:121889837.12	Naa25:121889837	Naa25	Proximal	chr5	121889837	121890165	0.08	0.06	0.14	0.1	0.13	0.17	0.16	0.05	0.11125	-0.42	-0.47	-0.34	-0.25	-0.12	-0.16	-0.12	-0.39	-0.28375	0.0350856	1	22.3236	13.5995	-0.275929	0.170578	0.170578	3.744	3.768	4.347	4.128	4.131	3.948	4.151	4.232	4.05613	0.902434	1	24.3333	8.6601	4.05423	0.150049	0.0370105
Nipsnap1:4793123.1	Nipsnap1:4793123	Nipsnap1	Distal	chr11	4793123	4794204	0.54	0.45	0.84	0.85	0.97	0.74	0.82	0.48	0.71125	-0.08	0.1	-0.68	-0.7	-0.94	-0.48	-0.64	0.04	-0.4225	0.0445853	1	22.6696	0.889059	-0.445401	0.454493	0.454493	52.615	44.927	63.745	64.751	48.465	58.603	46.311	44.495	52.989	0.467469	1	22.7817	9.14596	53.3242	6.92524	0.12987
Nipsnap1:4793123.2	Nipsnap1:4793123	Nipsnap1	Proximal	chr11	4793123	4793651	0.46	0.55	0.16	0.15	0.03	0.26	0.18	0.52	0.28875	-0.08	0.1	-0.68	-0.7	-0.94	-0.48	-0.64	0.04	-0.4225	0.0445853	1	22.6696	0.889059	-0.445401	0.454493	0.454493	52.615	44.927	63.745	64.751	48.465	58.603	46.311	44.495	52.989	0.467469	1	22.7817	9.14596	53.3242	6.92524	0.12987
Nme1:93820827.1	Nme1:93820827	Nme1	Distal	chr11	93820239	93820827	0.27	0.23	0.19	0.17	0.13	0.21	0.19	0.29	0.21	0.41	0.48	0.57	0.57	0.68	0.54	0.52	0.38	0.51875	0.00131918	0.670953	23.1733	11.4084	0.522781	0.117599	0.117599	38.84	42.167	34.283	32.717	34.358	40.804	42.308	34.397	37.4843	0.595592	1	21.6667	18.8189	37.1937	3.95742	0.1064
Nme1:93820827.3	Nme1:93820827	Nme1	Proximal	chr11	93820546	93820827	0.68	0.71	0.76	0.74	0.81	0.75	0.71	0.67	0.72875	0.41	0.48	0.57	0.57	0.68	0.54	0.52	0.38	0.51875	0.00131918	0.670953	23.1733	11.4084	0.522781	0.117599	0.117599	38.84	42.167	34.283	32.717	34.358	40.804	42.308	34.397	37.4843	0.595592	1	21.6667	18.8189	37.1937	3.95742	0.1064
Nme3:25034159.1	Nme3:25034159	Nme3	Distal	chr17	25034159	25034476	0.34	0.25	0.33	0.38	0.62	0.5	0.44	0.34	0.4	0.32	0.5	0.34	0.24	-0.24	0	0.12	0.32	0.2	0.0136024	0.851553	21.9219	3.08228	0.185422	0.314244	0.314244	52.225	49.288	50.116	34.023	54.727	43.523	30.35	59.705	46.7446	0.992132	1	26.0084	2.89152	46.9484	9.10622	0.193963
Nme3:25034159.2	Nme3:25034159	Nme3	Proximal	chr17	25034159	25034450	0.66	0.75	0.67	0.62	0.38	0.5	0.56	0.66	0.6	0.32	0.5	0.34	0.24	-0.24	0	0.12	0.32	0.2	0.0136024	0.851553	21.9219	3.08228	0.185422	0.314244	0.314244	52.225	49.288	50.116	34.023	54.727	43.523	30.35	59.705	46.7446	0.992132	1	26.0084	2.89152	46.9484	9.10622	0.193963
Nufip2:77523185.1	Nufip2:77523185	Nufip2	Distal	chr11	77523185	77531468	0.45	0.35	0.25	0.26	0.22	0.29	0.38	0.3	0.3125	-0.34	-0.29	-0.17	-0.1	0.1	-0.14	-0.31	-0.2	-0.18125	0.0194455	0.896864	21.5972	11.4416	-0.166518	0.151097	0.151097	11.22	7.309	10.448	10.929	11.742	9.247	11.235	8.213	10.0429	0.92892	1	22.6667	12.2325	10.102	1.17191	0.116008
Nufip2:77523185.6	Nufip2:77523185	Nufip2	Proximal	chr11	77523185	77524414	0.11	0.06	0.08	0.16	0.32	0.15	0.07	0.1	0.13125	-0.34	-0.29	-0.17	-0.1	0.1	-0.14	-0.31	-0.2	-0.18125	0.0194455	0.896864	21.5972	11.4416	-0.166518	0.151097	0.151097	11.22	7.309	10.448	10.929	11.742	9.247	11.235	8.213	10.0429	0.92892	1	22.6667	12.2325	10.102	1.17191	0.116008
Oxr1:41690704.1	Oxr1:41690704	Oxr1	Distal	chr15	41690704	41692594	0.68	0.51	0.41	0.34	0.46	0.22	0.42	0.48	0.44	-0.59	-0.35	-0.11	-0.03	-0.2	-0.09	-0.22	-0.34	-0.24125	0.0275341	0.947076	24.8753	10.4577	-0.248818	0.203004	0.203004	14.461	15.683	12.677	14.15	13.578	11.397	14.168	13.372	13.6858	0.938581	1	23.3396	0.115434	13.6685	0.65011	0.0475627
Oxr1:41690704.4	Oxr1:41690704	Oxr1	Proximal	chr15	41690704	41691789	0.09	0.16	0.3	0.31	0.26	0.13	0.2	0.14	0.19875	-0.59	-0.35	-0.11	-0.03	-0.2	-0.09	-0.22	-0.34	-0.24125	0.0275341	0.947076	24.8753	10.4577	-0.248818	0.203004	0.203004	14.461	15.683	12.677	14.15	13.578	11.397	14.168	13.372	13.6858	0.938581	1	23.3396	0.115434	13.6685	0.65011	0.0475627
Oxsm:17073584.2	Oxsm:17073584	Oxsm	Distal	chr14	17071250	17073584	0.25	0.24	0.24	0.24	0.22	0.21	0.32	0.23	0.24375	-0.02	0.01	0.15	0.21	0.06	0.08	-0.05	0	0.055	0.00573707	0.759369	20.581	8.94374	0.0681332	0.104778	0.104778	15.082	18.79	18.741	19.651	13.592	14.117	19.048	14.695	16.7145	0.944807	1	20.6457	5.84174	16.7607	2.18685	0.130475
Oxsm:17073584.3	Oxsm:17073584	Oxsm	Proximal	chr14	17071416	17073584	0.23	0.25	0.39	0.45	0.28	0.29	0.27	0.23	0.29875	-0.02	0.01	0.15	0.21	0.06	0.08	-0.05	0	0.055	0.00573707	0.759369	20.581	8.94374	0.0681332	0.104778	0.104778	15.082	18.79	18.741	19.651	13.592	14.117	19.048	14.695	16.7145	0.944807	1	20.6457	5.84174	16.7607	2.18685	0.130475
Parp14:35835021.1	Parp14:35835021	Parp14	Distal	chr16	35832964	35835021	0.58	0.6	0.68	0.69	0.78	0.8	0.71	0.46	0.6625	-0.38	-0.33	-0.43	-0.44	-0.64	-0.63	-0.52	0.05	-0.415	0.0298832	1	21.6667	2.0672	-0.435605	0.272754	0.272754	7.023	9.049	6.835	8.33	5.77	7.411	5.515	5.694	6.95338	0.93563	1	25.3333	6.39088	6.93403	0.652288	0.0940706
Parp14:35835021.3	Parp14:35835021	Parp14	Proximal	chr16	35834792	35835021	0.2	0.27	0.25	0.25	0.14	0.17	0.19	0.51	0.2475	-0.38	-0.33	-0.43	-0.44	-0.64	-0.63	-0.52	0.05	-0.415	0.0298832	1	21.6667	2.0672	-0.435605	0.272754	0.272754	7.023	9.049	6.835	8.33	5.77	7.411	5.515	5.694	6.95338	0.93563	1	25.3333	6.39088	6.93403	0.652288	0.0940706
Pcgf5:36530111.1	Pcgf5:36530111	Pcgf5	Distal	chr19	36530111	36535460	0.42	0.47	0.35	0.38	0.29	0.35	0.53	0.45	0.405	-0.34	-0.33	-0.23	-0.22	-0.05	-0.25	-0.42	-0.34	-0.2725	0.0426709	1	20.6457	10.9052	-0.255883	0.120867	0.120867	0.719	0.943	1.164	1.186	1.473	1.377	1.053	0.875	1.09875	0.000328906	0.0672462	24.2667	11.8097	1.09533	0.318693	0.290957
Pcgf5:36530111.7	Pcgf5:36530111	Pcgf5	Proximal	chr19	36530111	36530504	0.08	0.14	0.12	0.16	0.24	0.1	0.11	0.11	0.1325	-0.34	-0.33	-0.23	-0.22	-0.05	-0.25	-0.42	-0.34	-0.2725	0.0426709	1	20.6457	10.9052	-0.255883	0.120867	0.120867	0.719	0.943	1.164	1.186	1.473	1.377	1.053	0.875	1.09875	0.000328906	0.0672462	24.2667	11.8097	1.09533	0.318693	0.290957
Pde8a:88478302.1	Pde8a:88478302	Pde8a	Distal	chr7	88478302	88479419	0.45	0.25	0.24	0.17	0.16	0.26	0.37	0.39	0.28625	-0.13	0.34	0.31	0.49	0.57	0.34	0.06	0.01	0.24875	0.00383703	0.707086	24.1733	11.2157	0.246611	0.29395	0.29395	1.49	1.96	2.486	2.912	2.794	2.713	2.75	1.719	2.353	0.00680695	0.268604	24.5602	12.1591	2.33822	0.678373	0.290123
Pde8a:88478302.2	Pde8a:88478302	Pde8a	Proximal	chr7	88478302	88479346	0.32	0.59	0.55	0.66	0.73	0.6	0.43	0.4	0.535	-0.13	0.34	0.31	0.49	0.57	0.34	0.06	0.01	0.24875	0.00383703	0.707086	24.1733	11.2157	0.246611	0.29395	0.29395	1.49	1.96	2.486	2.912	2.794	2.713	2.75	1.719	2.353	0.00680695	0.268604	24.5602	12.1591	2.33822	0.678373	0.290123
Phlpp1:108288706.1	Phlpp1:108288706	Phlpp1	Distal	chr1	108288706	108290822	0.73	0.76	0.85	0.84	0.81	0.69	0.66	0.62	0.745	-0.58	-0.64	-0.77	-0.76	-0.67	-0.51	-0.45	-0.47	-0.60625	0.00111817	0.670953	23.7405	19.9168	-0.607519	0.143516	0.143516	#N/A	#N/A	#N/A	#N/A	#N/A	#N/A	#N/A	#N/A	#N/A	#N/A	#N/A	#N/A	#N/A	#N/A	#N/A	#N/A
Phlpp1:108288706.2	Phlpp1:108288706	Phlpp1	Proximal	chr1	108288706	108290207	0.15	0.12	0.08	0.08	0.14	0.18	0.21	0.15	0.13875	-0.58	-0.64	-0.77	-0.76	-0.67	-0.51	-0.45	-0.47	-0.60625	0.00111817	0.670953	23.7405	19.9168	-0.607519	0.143516	0.143516	#N/A	#N/A	#N/A	#N/A	#N/A	#N/A	#N/A	#N/A	#N/A	#N/A	#N/A	#N/A	#N/A	#N/A	#N/A	#N/A
Pigp:94586394.5	Pigp:94586394	Pigp	Distal	chr16	94586173	94586394	0.15	0.15	0.19	0.15	0.2	0.2	0.32	0.26	0.2025	0.13	0.1	0.29	0.26	0.32	0.22	0	0.07	0.17375	0.0417697	1	22.3313	10.4442	0.18263	0.125121	0.125121	7.963	9.941	9.983	13.257	13.935	15.021	14.611	11.887	12.0747	0.0063785	0.261086	23.8683	14.0763	12.0834	2.61899	0.216742
Pigp:94586394.6	Pigp:94586394	Pigp	Proximal	chr16	94586198	94586394	0.28	0.25	0.48	0.41	0.52	0.42	0.32	0.33	0.37625	0.13	0.1	0.29	0.26	0.32	0.22	0	0.07	0.17375	0.0417697	1	22.3313	10.4442	0.18263	0.125121	0.125121	7.963	9.941	9.983	13.257	13.935	15.021	14.611	11.887	12.0747	0.0063785	0.261086	23.8683	14.0763	12.0834	2.61899	0.216742
Pisd:33080102.2	Pisd:33080102	Pisd	Distal	chr5	33078952	33080102	0.44	0.57	0.39	0.57	0.56	0.38	0.16	0.24	0.41375	-0.12	-0.32	-0.28	-0.31	-0.27	0.02	0.57	0.35	-0.045	0.0163421	0.896864	23.8418	20.1821	-0.0465833	0.28157	0.28157	16.918	15.591	12.573	12.596	13.969	13.889	13.684	13.076	14.037	0.497526	1	24.3333	20.4336	14.0551	1.51618	0.107874
Pisd:33080102.3	Pisd:33080102	Pisd	Proximal	chr5	33079163	33080102	0.32	0.25	0.11	0.26	0.29	0.4	0.73	0.59	0.36875	-0.12	-0.32	-0.28	-0.31	-0.27	0.02	0.57	0.35	-0.045	0.0163421	0.896864	23.8418	20.1821	-0.0465833	0.28157	0.28157	16.918	15.591	12.573	12.596	13.969	13.889	13.684	13.076	14.037	0.497526	1	24.3333	20.4336	14.0551	1.51618	0.107874
Pnrc2:135428369.3	Pnrc2:135428369	Pnrc2	Distal	chr4	135426841	135428369	0.39	0.29	0.33	0.27	0.46	0.52	0.62	0.4	0.41	-0.02	0.28	0.01	0	-0.25	-0.32	-0.49	-0.11	-0.1125	0.0486901	1	23.9053	4.31616	-0.112569	0.311767	0.311767	189.977	213.336	143.723	162.825	125.883	141.981	205.884	195.549	172.395	0.0617684	0.792064	20.5351	1.29101	167.536	35.9238	0.214424
Pnrc2:135428369.9	Pnrc2:135428369	Pnrc2	Proximal	chr4	135427822	135428369	0.37	0.57	0.34	0.27	0.21	0.2	0.13	0.29	0.2975	-0.02	0.28	0.01	0	-0.25	-0.32	-0.49	-0.11	-0.1125	0.0486901	1	23.9053	4.31616	-0.112569	0.311767	0.311767	189.977	213.336	143.723	162.825	125.883	141.981	205.884	195.549	172.395	0.0617684	0.792064	20.5351	1.29101	167.536	35.9238	0.214424
Prkaa2:104708935.2	Prkaa2:104708935	Prkaa2	Distal	chr4	104702479	104708935	0.68	0.57	0.49	0.53	0.6	0.62	0.55	0.63	0.58375	-0.54	-0.35	-0.17	-0.16	-0.35	-0.39	-0.42	-0.48	-0.3575	0.00996612	0.806085	21.8925	8.20203	-0.345041	0.176719	0.176719	7.95	7.364	7.401	11.385	12.734	8.292	12.337	7.611	9.38425	0.192134	1	22.5742	13.0455	9.48294	2.1386	0.225521
Prkaa2:104708935.3	Prkaa2:104708935	Prkaa2	Proximal	chr4	104707126	104708935	0.14	0.22	0.32	0.37	0.25	0.23	0.13	0.15	0.22625	-0.54	-0.35	-0.17	-0.16	-0.35	-0.39	-0.42	-0.48	-0.3575	0.00996612	0.806085	21.8925	8.20203	-0.345041	0.176719	0.176719	7.95	7.364	7.401	11.385	12.734	8.292	12.337	7.611	9.38425	0.192134	1	22.5742	13.0455	9.48294	2.1386	0.225521
Psma2:14717616.4	Psma2:14717616	Psma2	Distal	chr13	14717616	14717940	0.11	0.08	0.1	0.08	0.13	0.15	0.21	0.17	0.12875	0.66	0.77	0.74	0.77	0.66	0.55	0.47	0.5	0.64	0.0111416	0.806085	23.8457	7.38858	0.640497	0.11036	0.11036	21.894	33.704	31.614	30.252	25.863	27.175	32.032	27.618	28.769	0.98371	1	21.6667	6.09204	28.8796	3.89538	0.134883
Psma2:14717616.5	Psma2:14717616	Psma2	Proximal	chr13	14717616	14717869	0.77	0.85	0.84	0.85	0.79	0.7	0.68	0.67	0.76875	0.66	0.77	0.74	0.77	0.66	0.55	0.47	0.5	0.64	0.0111416	0.806085	23.8457	7.38858	0.640497	0.11036	0.11036	21.894	33.704	31.614	30.252	25.863	27.175	32.032	27.618	28.769	0.98371	1	21.6667	6.09204	28.8796	3.89538	0.134883
Rab11b:33884758.1	Rab11b:33884758	Rab11b	Distal	chr17	33883542	33884758	0.77	0.85	0.81	0.92	0.94	0.93	0.89	0.89	0.875	-0.54	-0.7	-0.62	-0.84	-0.88	-0.86	-0.78	-0.78	-0.75	0.0253736	0.939264	24.0776	0.794147	-0.749713	0.105496	0.105496	6.644	6.676	6.223	7.842	6.825	5.9	5.812	5.755	6.45962	0.226131	1	23.1055	9.37285	6.4784	0.51499	0.0794934
Rab11b:33884758.2	Rab11b:33884758	Rab11b	Proximal	chr17	33883630	33884758	0.23	0.15	0.19	0.08	0.06	0.07	0.11	0.11	0.125	-0.54	-0.7	-0.62	-0.84	-0.88	-0.86	-0.78	-0.78	-0.75	0.0253736	0.939264	24.0776	0.794147	-0.749713	0.105496	0.105496	6.644	6.676	6.223	7.842	6.825	5.9	5.812	5.755	6.45962	0.226131	1	23.1055	9.37285	6.4784	0.51499	0.0794934
Rab20:11454526.1	Rab20:11454526	Rab20	Distal	chr8	11453390	11454526	0.27	0.19	0.2	0.24	0.32	0.5	0.4	0.21	0.29125	0.46	0.62	0.6	0.52	0.36	0	0.2	0.58	0.4175	0.0399657	1	21.6667	4.75092	0.414318	0.335796	0.335796	1.485	1.888	1.632	1.382	1.211	2.4	2.038	1.474	1.68875	0.993886	1	21.6667	18.3621	1.67428	0.225728	0.134821
Rab20:11454526.2	Rab20:11454526	Rab20	Proximal	chr8	11453518	11454526	0.73	0.81	0.8	0.76	0.68	0.5	0.6	0.79	0.70875	0.46	0.62	0.6	0.52	0.36	0	0.2	0.58	0.4175	0.0399657	1	21.6667	4.75092	0.414318	0.335796	0.335796	1.485	1.888	1.632	1.382	1.211	2.4	2.038	1.474	1.68875	0.993886	1	21.6667	18.3621	1.67428	0.225728	0.134821
Rbm16:3196760.5	Rbm16:3196760	Rbm16	Distal	chr17	3196760	3198803	0.15	0.23	0.17	0.2	0.16	0.18	0.23	0.21	0.19125	0.06	0.08	0.2	0.16	0.23	0.11	-0.08	0.01	0.09625	0.0337513	1	22.5631	10.3417	0.102535	0.102735	0.102735	2.025	2.261	2.183	2.639	2.502	2.624	3.146	2.068	2.431	0.799512	1	24.0784	14.6526	2.4304	0.381419	0.156937
Rbm16:3196760.6	Rbm16:3196760	Rbm16	Proximal	chr17	3196760	3198687	0.21	0.31	0.37	0.36	0.39	0.29	0.15	0.22	0.2875	0.06	0.08	0.2	0.16	0.23	0.11	-0.08	0.01	0.09625	0.0337513	1	22.5631	10.3417	0.102535	0.102735	0.102735	2.025	2.261	2.183	2.639	2.502	2.624	3.146	2.068	2.431	0.799512	1	24.0784	14.6526	2.4304	0.381419	0.156937
Rbmx:54640570.2	Rbmx:54640570	Rbmx	Distal	chrX	54636525	54640570	0.42	0.28	0.17	0.18	0.27	0.24	0.55	0.47	0.3225	-0.14	0.27	0.51	0.49	0.21	0.27	-0.36	-0.26	0.12375	0.00889581	0.789455	23.5115	7.8536	0.130427	0.420369	0.420369	38.105	32.261	28.682	44.329	21.191	28.857	43.685	31.122	33.529	0.999194	1	20.6651	1.84525	33.2288	2.49589	0.0751122
Rbmx:54640570.3	Rbmx:54640570	Rbmx	Proximal	chrX	54639520	54640570	0.28	0.55	0.68	0.67	0.48	0.51	0.19	0.21	0.44625	-0.14	0.27	0.51	0.49	0.21	0.27	-0.36	-0.26	0.12375	0.00889581	0.789455	23.5115	7.8536	0.130427	0.420369	0.420369	38.105	32.261	28.682	44.329	21.191	28.857	43.685	31.122	33.529	0.999194	1	20.6651	1.84525	33.2288	2.49589	0.0751122
Rnf149:39609360.1	Rnf149:39609360	Rnf149	Distal	chr1	39608141	39609360	0.13	0.35	0.44	0.73	0.61	0.7	0.56	0.45	0.49625	0.3	0.06	-0.04	-0.55	-0.34	-0.54	-0.29	-0.11	-0.18875	0.0213462	0.896864	25.3711	0.354057	-0.172891	0.337059	0.337059	7.986	8.804	9.933	11.923	9.395	10.218	12.649	8.324	9.904	0.877502	1	25.2144	11.7858	9.84744	1.15488	0.117278
Rnf149:39609360.2	Rnf149:39609360	Rnf149	Proximal	chr1	39608218	39609360	0.43	0.41	0.4	0.18	0.27	0.16	0.27	0.34	0.3075	0.3	0.06	-0.04	-0.55	-0.34	-0.54	-0.29	-0.11	-0.18875	0.0213462	0.896864	25.3711	0.354057	-0.172891	0.337059	0.337059	7.986	8.804	9.933	11.923	9.395	10.218	12.649	8.324	9.904	0.877502	1	25.2144	11.7858	9.84744	1.15488	0.117278
Rnmt:68480972.3	Rnmt:68480972	Rnmt	Distal	chr18	68480972	68481561	0.27	0.22	0.24	0.44	0.49	0.37	0.27	0.28	0.3225	-0.01	0.07	0.05	-0.12	-0.22	-0.02	0.06	0.14	-0.00625	0.0230183	0.896864	20.9513	1.97804	-0.0212931	0.142288	0.142288	4.671	5.176	3.557	5.578	4.18	3.239	4.717	4.967	4.51063	0.994677	1	22.6667	2.02039	4.49178	0.471311	0.104927
Rnmt:68480972.4	Rnmt:68480972	Rnmt	Proximal	chr18	68480972	68481509	0.26	0.29	0.29	0.32	0.27	0.35	0.33	0.42	0.31625	-0.01	0.07	0.05	-0.12	-0.22	-0.02	0.06	0.14	-0.00625	0.0230183	0.896864	20.9513	1.97804	-0.0212931	0.142288	0.142288	4.671	5.176	3.557	5.578	4.18	3.239	4.717	4.967	4.51063	0.994677	1	22.6667	2.02039	4.49178	0.471311	0.104927
Rsc1a1:141241631.1	Rsc1a1:141241631	Rsc1a1	Distal	chr4	141233466	141241631	0.38	0.23	0.22	0.28	0.36	0.41	0.32	0.35	0.31875	0.07	0.31	0.38	0.21	0.03	-0.01	0.12	0.14	0.15625	0.0456991	1	21.6667	5.40778	0.158166	0.207109	0.207109	204.514	224.812	254.392	240.239	190.227	203.854	232.812	201.987	219.105	0.89148	1	20.7447	6.07159	219.769	21.6763	0.0986321
Rsc1a1:141241631.4	Rsc1a1:141241631	Rsc1a1	Proximal	chr4	141239479	141241631	0.45	0.54	0.6	0.49	0.39	0.4	0.44	0.49	0.475	0.07	0.31	0.38	0.21	0.03	-0.01	0.12	0.14	0.15625	0.0456991	1	21.6667	5.40778	0.158166	0.207109	0.207109	204.514	224.812	254.392	240.239	190.227	203.854	232.812	201.987	219.105	0.89148	1	20.7447	6.07159	219.769	21.6763	0.0986321
Rtn4:29641987.1	Rtn4:29641987	Rtn4	Distal	chr11	29641987	29642916	0.8	0.87	0.82	0.86	0.89	0.77	0.72	0.68	0.80125	-0.67	-0.77	-0.69	-0.78	-0.85	-0.57	-0.49	-0.43	-0.65625	0.0479098	1	23.9577	21.1288	-0.656464	0.125867	0.125867	12.607	16.762	19.708	23.154	19.368	22.027	20.779	14.586	18.6239	0.0637586	0.804269	25.9236	10.7819	18.2805	4.23865	0.231868
Rtn4:29641987.2	Rtn4:29641987	Rtn4	Proximal	chr11	29641987	29642285	0.13	0.1	0.13	0.08	0.04	0.2	0.23	0.25	0.145	-0.67	-0.77	-0.69	-0.78	-0.85	-0.57	-0.49	-0.43	-0.65625	0.0479098	1	23.9577	21.1288	-0.656464	0.125867	0.125867	12.607	16.762	19.708	23.154	19.368	22.027	20.779	14.586	18.6239	0.0637586	0.804269	25.9236	10.7819	18.2805	4.23865	0.231868
Samhd1:156925239.3	Samhd1:156925239	Samhd1	Distal	chr2	156925050	156925239	0.24	0.19	0.29	0.17	0.13	0.17	0.25	0.3	0.2175	-0.06	0.01	0.05	0.21	0.57	0.24	0.08	0.07	0.14625	0.00269181	0.707086	22.033	12.3579	0.162094	0.22013	0.22013	3.633	4.388	3.468	4.704	4.564	6.857	5.013	3.196	4.47788	0.637727	1	21.7287	14.5523	4.53259	1.46812	0.323903
Samhd1:156925239.4	Samhd1:156925239	Samhd1	Proximal	chr2	156925135	156925239	0.18	0.2	0.34	0.38	0.7	0.41	0.33	0.37	0.36375	-0.06	0.01	0.05	0.21	0.57	0.24	0.08	0.07	0.14625	0.00269181	0.707086	22.033	12.3579	0.162094	0.22013	0.22013	3.633	4.388	3.468	4.704	4.564	6.857	5.013	3.196	4.47788	0.637727	1	21.7287	14.5523	4.53259	1.46812	0.323903
Sdccag3:26239214.1	Sdccag3:26239214	Sdccag3	Distal	chr2	26238322	26239214	0.31	0.23	0.31	0.46	0.36	0.31	0.23	0.2	0.30125	0.38	0.54	0.38	0.08	0.28	0.38	0.54	0.6	0.3975	0.0405076	1	21.4099	0.180014	0.378565	0.175112	0.175112	39.374	29.95	25.79	29.117	38.027	44.97	34.269	32.538	34.2544	0.219797	1	21.6667	16.1587	34.1821	10.4742	0.306425
Sdccag3:26239214.2	Sdccag3:26239214	Sdccag3	Proximal	chr2	26238878	26239214	0.69	0.77	0.69	0.54	0.64	0.69	0.77	0.8	0.69875	0.38	0.54	0.38	0.08	0.28	0.38	0.54	0.6	0.3975	0.0405076	1	21.4099	0.180014	0.378565	0.175112	0.175112	39.374	29.95	25.79	29.117	38.027	44.97	34.269	32.538	34.2544	0.219797	1	21.6667	16.1587	34.1821	10.4742	0.306425
Sdhaf2:10577619.6	Sdhaf2:10577619	Sdhaf2	Distal	chr19	10576131	10577619	0.18	0.27	0.35	0.57	0.4	0.52	0.25	0.32	0.3575	0.28	0.18	-0.06	-0.42	-0.11	-0.39	-0.02	0.01	-0.06625	0.0266401	0.947076	24.46	23.9922	-0.0614622	0.257187	0.257187	12.213	11.741	7.776	8.094	11.194	10.31	11.128	9.024	10.185	0.776687	1	21.6667	18.5206	10.0587	1.87203	0.186111
Sdhaf2:10577619.8	Sdhaf2:10577619	Sdhaf2	Proximal	chr19	10576924	10577619	0.46	0.45	0.29	0.15	0.29	0.13	0.23	0.33	0.29125	0.28	0.18	-0.06	-0.42	-0.11	-0.39	-0.02	0.01	-0.06625	0.0266401	0.947076	24.46	23.9922	-0.0614622	0.257187	0.257187	12.213	11.741	7.776	8.094	11.194	10.31	11.128	9.024	10.185	0.776687	1	21.6667	18.5206	10.0587	1.87203	0.186111
Selk:30787662.3	Selk:30787662	Selk	Distal	chr14	30787662	30788195	0.37	0.3	0.38	0.74	0.72	0.56	0.57	0.27	0.48875	0	-0.11	-0.07	-0.68	-0.6	-0.39	-0.41	0.04	-0.2775	0.0362115	1	21.4899	1.0557	-0.308511	0.316235	0.316235	31.853	28.824	19.127	20.751	20.955	28.673	31.725	19.616	25.1905	0.624294	1	21.6667	19.1007	24.7165	6.03613	0.244215
Selk:30787662.4	Selk:30787662	Selk	Proximal	chr14	30787662	30788018	0.37	0.19	0.31	0.06	0.12	0.17	0.16	0.31	0.21125	0	-0.11	-0.07	-0.68	-0.6	-0.39	-0.41	0.04	-0.2775	0.0362115	1	21.4899	1.0557	-0.308511	0.316235	0.316235	31.853	28.824	19.127	20.751	20.955	28.673	31.725	19.616	25.1905	0.624294	1	21.6667	19.1007	24.7165	6.03613	0.244215
Selp:166079151.1	Selp:166079151	Selp	Distal	chr1	166079151	166080154	0.22	0.2	0.18	0.15	0.13	0.17	0.22	0.35	0.2025	0.56	0.6	0.64	0.7	0.74	0.66	0.56	0.3	0.595	0.00161668	0.670953	24.7071	11.7029	0.590297	0.1636	0.1636	2.344	2.125	2.583	3.346	2.592	2.319	1.887	2.079	2.40938	0.0547558	0.744087	21.4099	9.78014	2.45782	0.455325	0.185255
Selp:166079151.2	Selp:166079151	Selp	Proximal	chr1	166079151	166079876	0.78	0.8	0.82	0.85	0.87	0.83	0.78	0.65	0.7975	0.56	0.6	0.64	0.7	0.74	0.66	0.56	0.3	0.595	0.00161668	0.670953	24.7071	11.7029	0.590297	0.1636	0.1636	2.344	2.125	2.583	3.346	2.592	2.319	1.887	2.079	2.40938	0.0547558	0.744087	21.4099	9.78014	2.45782	0.455325	0.185255
Sema6d:124489757.1	Sema6d:124489757	Sema6d	Distal	chr2	124489757	124493747	0.34	0.29	0.29	0.27	0.31	0.42	0.42	0.39	0.34125	0.32	0.42	0.42	0.46	0.38	0.16	0.16	0.22	0.3175	0.0458634	1	23.8198	7.91435	0.318178	0.113298	0.113298	5.613	5.742	5.194	5.961	5.045	7.385	6.374	5.935	5.90613	0.954564	1	22.3435	17.5832	5.89048	0.543203	0.0922171
Sema6d:124489757.2	Sema6d:124489757	Sema6d	Proximal	chr2	124489757	124493506	0.66	0.71	0.71	0.73	0.69	0.58	0.58	0.61	0.65875	0.32	0.42	0.42	0.46	0.38	0.16	0.16	0.22	0.3175	0.0458634	1	23.8198	7.91435	0.318178	0.113298	0.113298	5.613	5.742	5.194	5.961	5.045	7.385	6.374	5.935	5.90613	0.954564	1	22.3435	17.5832	5.89048	0.543203	0.0922171
Slain2:73367236.1	Slain2:73367236	Slain2	Distal	chr5	73367236	73370094	0.33	0.26	0.08	0.15	0.18	0.2	0.35	0.25	0.225	-0.24	0.05	0.06	0.12	0.03	-0.03	-0.21	-0.03	-0.03125	0.0378566	1	21.6667	8.13859	-0.0187067	0.164487	0.164487	6.076	4.805	4.619	5.202	5.939	6.688	6.587	5.212	5.641	0.00962897	0.323673	21.6667	16.3782	5.62356	1.32793	0.236137
Slain2:73367236.2	Slain2:73367236	Slain2	Proximal	chr5	73367236	73370068	0.09	0.31	0.14	0.27	0.21	0.17	0.14	0.22	0.19375	-0.24	0.05	0.06	0.12	0.03	-0.03	-0.21	-0.03	-0.03125	0.0378566	1	21.6667	8.13859	-0.0187067	0.164487	0.164487	6.076	4.805	4.619	5.202	5.939	6.688	6.587	5.212	5.641	0.00962897	0.323673	21.6667	16.3782	5.62356	1.32793	0.236137
Slc22a23:34275180.1	Slc22a23:34275180	Slc22a23	Distal	chr13	34271038	34275180	0.65	0.62	0.69	0.59	0.49	0.48	0.57	0.66	0.59375	-0.44	-0.44	-0.46	-0.34	-0.06	-0.03	-0.24	-0.44	-0.30625	0.0275017	0.947076	21.9219	14.258	-0.295505	0.257656	0.257656	2.704	2.889	3.786	4.768	3.947	3.53	3.621	3.018	3.53287	0.0115127	0.348726	21.6033	9.96924	3.6083	0.75555	0.209392
Slc22a23:34275180.2	Slc22a23:34275180	Slc22a23	Proximal	chr13	34271512	34275180	0.21	0.18	0.23	0.25	0.43	0.45	0.33	0.22	0.2875	-0.44	-0.44	-0.46	-0.34	-0.06	-0.03	-0.24	-0.44	-0.30625	0.0275017	0.947076	21.9219	14.258	-0.295505	0.257656	0.257656	2.704	2.889	3.786	4.768	3.947	3.53	3.621	3.018	3.53287	0.0115127	0.348726	21.6033	9.96924	3.6083	0.75555	0.209392
Slc35b1:95252802.1	Slc35b1:95252802	Slc35b1	Distal	chr11	95252802	95253090	0.85	0.93	0.93	0.92	0.89	0.86	0.83	0.78	0.87375	-0.7	-0.86	-0.86	-0.84	-0.78	-0.72	-0.66	-0.56	-0.7475	0.0209524	0.896864	24.9855	21.2884	-0.743503	0.104758	0.104758	65.169	67.496	50.204	49.671	57.813	60.652	64.502	54.952	58.8074	0.608264	1	21.6667	18.7737	58.2362	7.87199	0.135173
Slc35b1:95252802.2	Slc35b1:95252802	Slc35b1	Proximal	chr11	95252802	95253034	0.15	0.07	0.07	0.08	0.11	0.14	0.17	0.22	0.12625	-0.7	-0.86	-0.86	-0.84	-0.78	-0.72	-0.66	-0.56	-0.7475	0.0209524	0.896864	24.9855	21.2884	-0.743503	0.104758	0.104758	65.169	67.496	50.204	49.671	57.813	60.652	64.502	54.952	58.8074	0.608264	1	21.6667	18.7737	58.2362	7.87199	0.135173
Sod3:52759182.1	Sod3:52759182	Sod3	Distal	chr5	52759182	52760938	0.13	0.09	0.08	0.1	0.32	0.24	0.17	0.11	0.155	0.74	0.82	0.84	0.8	0.36	0.52	0.66	0.78	0.69	0.0429411	1	21.6667	4.37769	0.685198	0.240017	0.240017	22.494	22.296	23.524	26.073	18.635	15.31	24.473	18.068	21.3591	0.99233	1	23.3435	6.32844	21.382	1.88215	0.0880251
Sod3:52759182.2	Sod3:52759182	Sod3	Proximal	chr5	52759182	52760748	0.87	0.91	0.92	0.9	0.68	0.76	0.83	0.89	0.845	0.74	0.82	0.84	0.8	0.36	0.52	0.66	0.78	0.69	0.0429411	1	21.6667	4.37769	0.685198	0.240017	0.240017	22.494	22.296	23.524	26.073	18.635	15.31	24.473	18.068	21.3591	0.99233	1	23.3435	6.32844	21.382	1.88215	0.0880251
Sorbs2:46911099.1	Sorbs2:46911099	Sorbs2	Distal	chr8	46911099	46913259	0.79	0.77	0.61	0.67	0.66	0.69	0.84	0.76	0.72375	-0.65	-0.6	-0.3	-0.41	-0.41	-0.51	-0.74	-0.63	-0.53125	0.00832147	0.789455	20.8953	9.00526	-0.511052	0.173781	0.173781	5.663	7.077	4.373	5.228	3.789	3.964	6.268	4.451	5.10163	0.861808	1	22.5742	1.00752	5.05956	0.788474	0.155838
Sorbs2:46911099.4	Sorbs2:46911099	Sorbs2	Proximal	chr8	46911099	46911780	0.14	0.17	0.31	0.26	0.25	0.18	0.1	0.13	0.1925	-0.65	-0.6	-0.3	-0.41	-0.41	-0.51	-0.74	-0.63	-0.53125	0.00832147	0.789455	20.8953	9.00526	-0.511052	0.173781	0.173781	5.663	7.077	4.373	5.228	3.789	3.964	6.268	4.451	5.10163	0.861808	1	22.5742	1.00752	5.05956	0.788474	0.155838
Srsf2ip:96245347.1	Srsf2ip:96245347	Srsf2ip	Distal	chr15	96242133	96245347	0.15	0.12	0.1	0.09	0.21	0.13	0.3	0.29	0.17375	0.02	0.14	0.28	0.15	0.03	0.02	-0.21	-0.21	0.0275	0.00220656	0.670953	23.8058	7.63399	0.0285075	0.166789	0.166789	7.76	7.224	8.503	10.41	8.021	7.03	7.085	7.207	7.905	0.220305	1	20.4558	8.9508	8.04987	1.11943	0.139062
Srsf2ip:96245347.3	Srsf2ip:96245347	Srsf2ip	Proximal	chr15	96243467	96245347	0.17	0.26	0.38	0.24	0.24	0.15	0.09	0.08	0.20125	0.02	0.14	0.28	0.15	0.03	0.02	-0.21	-0.21	0.0275	0.00220656	0.670953	23.8058	7.63399	0.0285075	0.166789	0.166789	7.76	7.224	8.503	10.41	8.021	7.03	7.085	7.207	7.905	0.220305	1	20.4558	8.9508	8.04987	1.11943	0.139062
Ssbp3:106720629.1	Ssbp3:106720629	Ssbp3	Distal	chr4	106720629	106722299	0.15	0.1	0.25	0.24	0.21	0.26	0.12	0.07	0.175	0.11	0.04	0.03	0.01	-0.09	0.04	0.21	0.25	0.075	0.00489984	0.710856	23.7407	23.3667	0.0736948	0.121887	0.121887	1.292	1.723	2.058	1.822	1.652	1.963	2.022	1.717	1.78113	0.914526	1	25.3333	9.32877	1.77228	0.163023	0.0919845
Ssbp3:106720629.3	Ssbp3:106720629	Ssbp3	Proximal	chr4	106720629	106721301	0.26	0.14	0.28	0.25	0.12	0.3	0.33	0.32	0.25	0.11	0.04	0.03	0.01	-0.09	0.04	0.21	0.25	0.075	0.00489984	0.710856	23.7407	23.3667	0.0736948	0.121887	0.121887	1.292	1.723	2.058	1.822	1.652	1.963	2.022	1.717	1.78113	0.914526	1	25.3333	9.32877	1.77228	0.163023	0.0919845
Stk35:129653510.1	Stk35:129653510	Stk35	Distal	chr2	129653510	129658008	0.41	0.59	0.59	0.69	0.58	0.54	0.54	0.51	0.55625	-0.17	-0.41	-0.42	-0.57	-0.49	-0.39	-0.36	-0.36	-0.39625	0.00355738	0.707086	21.6485	20.03	-0.408831	0.136338	0.136338	2.074	1.423	2.659	3.413	4.416	2.82	2.458	2.275	2.69225	0.00410524	0.218328	21.3647	11.5919	2.798	1.00735	0.360025
Stk35:129653510.3	Stk35:129653510	Stk35	Proximal	chr2	129653510	129653798	0.24	0.18	0.17	0.12	0.09	0.15	0.18	0.15	0.16	-0.17	-0.41	-0.42	-0.57	-0.49	-0.39	-0.36	-0.36	-0.39625	0.00355738	0.707086	21.6485	20.03	-0.408831	0.136338	0.136338	2.074	1.423	2.659	3.413	4.416	2.82	2.458	2.275	2.69225	0.00410524	0.218328	21.3647	11.5919	2.798	1.00735	0.360025
Stk38l:146724116.1	Stk38l:146724116	Stk38l	Distal	chr6	146724116	146727329	0.25	0.25	0.09	0.18	0.32	0.41	0.7	0.32	0.315	0.05	0.27	0.41	0.33	0.15	0.02	-0.52	0.21	0.115	0.0230086	0.896864	21.9219	6.97511	0.130084	0.322421	0.322421	2.124	2.046	2.277	2.788	2.851	2.612	3.565	2.191	2.55675	0.536722	1	22.1514	14.3334	2.57288	0.442196	0.171868
Stk38l:146724116.2	Stk38l:146724116	Stk38l	Proximal	chr6	146724116	146727100	0.3	0.52	0.5	0.51	0.47	0.43	0.18	0.53	0.43	0.05	0.27	0.41	0.33	0.15	0.02	-0.52	0.21	0.115	0.0230086	0.896864	21.9219	6.97511	0.130084	0.322421	0.322421	2.124	2.046	2.277	2.788	2.851	2.612	3.565	2.191	2.55675	0.536722	1	22.1514	14.3334	2.57288	0.442196	0.171868
Styx:45993187.2	Styx:45993187	Styx	Distal	chr14	45993187	46005163	0.32	0.46	0.46	0.67	0.57	0.37	0.17	0.22	0.405	0.2	-0.12	-0.09	-0.45	-0.42	-0.26	0.25	0.23	-0.0825	0.00821505	0.789455	22.9335	22.4426	-0.0978487	0.339825	0.339825	#N/A	#N/A	#N/A	#N/A	#N/A	#N/A	#N/A	#N/A	#N/A	#N/A	#N/A	#N/A	#N/A	#N/A	#N/A	#N/A
Styx:45993187.3	Styx:45993187	Styx	Proximal	chr14	45993187	46001188	0.52	0.34	0.37	0.22	0.15	0.11	0.42	0.45	0.3225	0.2	-0.12	-0.09	-0.45	-0.42	-0.26	0.25	0.23	-0.0825	0.00821505	0.789455	22.9335	22.4426	-0.0978487	0.339825	0.339825	#N/A	#N/A	#N/A	#N/A	#N/A	#N/A	#N/A	#N/A	#N/A	#N/A	#N/A	#N/A	#N/A	#N/A	#N/A	#N/A
Sugt1:80028659.2	Sugt1:80028659	Sugt1	Distal	chr14	80028659	80030599	0.4	0.58	0.49	0.26	0.26	0.27	0.35	0.42	0.37875	-0.18	-0.35	-0.25	-0.02	0	0.04	-0.11	-0.27	-0.1425	0.0115376	0.806085	21.6667	13.0004	-0.128843	0.185337	0.185337	6.017	5.635	4.439	4.403	5.55	4.746	5.791	4.382	5.12038	0.90771	1	21.6667	18.5133	5.07507	0.672935	0.132596
Sugt1:80028659.5	Sugt1:80028659	Sugt1	Proximal	chr14	80028659	80028784	0.22	0.23	0.24	0.24	0.26	0.31	0.24	0.15	0.23625	-0.18	-0.35	-0.25	-0.02	0	0.04	-0.11	-0.27	-0.1425	0.0115376	0.806085	21.6667	13.0004	-0.128843	0.185337	0.185337	6.017	5.635	4.439	4.403	5.55	4.746	5.791	4.382	5.12038	0.90771	1	21.6667	18.5133	5.07507	0.672935	0.132596
Sumf1:108058580.1	Sumf1:108058580	Sumf1	Distal	chr6	108057022	108058580	0.81	0.74	0.56	0.59	0.46	0.7	0.63	0.82	0.66375	-0.62	-0.48	-0.12	-0.18	0.08	-0.4	-0.26	-0.64	-0.3275	0.0196181	0.896864	23.1733	10.689	-0.31751	0.283049	0.283049	2.207	2.4	2.184	2.329	2.594	2.378	2.405	2.331	2.3535	0.865286	1	21.7026	13.4507	2.35959	0.0955853	0.0405093
Sumf1:108058580.2	Sumf1:108058580	Sumf1	Proximal	chr6	108058317	108058580	0.19	0.26	0.44	0.41	0.54	0.3	0.37	0.18	0.33625	-0.62	-0.48	-0.12	-0.18	0.08	-0.4	-0.26	-0.64	-0.3275	0.0196181	0.896864	23.1733	10.689	-0.31751	0.283049	0.283049	2.207	2.4	2.184	2.329	2.594	2.378	2.405	2.331	2.3535	0.865286	1	21.7026	13.4507	2.35959	0.0955853	0.0405093
Taco1:105934415.4	Taco1:105934415	Taco1	Distal	chr11	105934415	105937071	0.67	0.41	0.36	0.42	0.35	0.4	0.68	0.51	0.475	-0.52	-0.1	-0.02	-0.01	0.04	-0.08	-0.53	-0.2	-0.1775	0.0373148	1	20.4898	10.2354	-0.145657	0.221347	0.221347	6.006	11.018	9.359	10.082	9.686	7.331	5.618	9.149	8.53113	0.415933	1	21.6667	7.12849	8.66716	2.4722	0.285238
Taco1:105934415.5	Taco1:105934415	Taco1	Proximal	chr11	105934415	105935070	0.15	0.31	0.34	0.41	0.39	0.32	0.15	0.31	0.2975	-0.52	-0.1	-0.02	-0.01	0.04	-0.08	-0.53	-0.2	-0.1775	0.0373148	1	20.4898	10.2354	-0.145657	0.221347	0.221347	6.006	11.018	9.359	10.082	9.686	7.331	5.618	9.149	8.53113	0.415933	1	21.6667	7.12849	8.66716	2.4722	0.285238
Tarsl2:72836057.3	Tarsl2:72836057	Tarsl2	Distal	chr7	72836057	72836977	0.56	0.62	0.68	0.73	0.76	0.68	0.56	0.61	0.65	-0.37	-0.44	-0.5	-0.63	-0.68	-0.54	-0.44	-0.49	-0.51125	0.0021735	0.670953	22.3978	22.3319	-0.519077	0.116612	0.116612	2.755	2.103	3.391	2.824	3.862	3.362	2.713	2.399	2.92613	0.139554	1	21.0593	12.7288	2.98801	0.640943	0.214505
Tarsl2:72836057.4	Tarsl2:72836057	Tarsl2	Proximal	chr7	72836057	72836674	0.19	0.18	0.18	0.1	0.08	0.14	0.12	0.12	0.13875	-0.37	-0.44	-0.5	-0.63	-0.68	-0.54	-0.44	-0.49	-0.51125	0.0021735	0.670953	22.3978	22.3319	-0.519077	0.116612	0.116612	2.755	2.103	3.391	2.824	3.862	3.362	2.713	2.399	2.92613	0.139554	1	21.0593	12.7288	2.98801	0.640943	0.214505
Tbc1d8b:136286000.1	Tbc1d8b:136286000	Tbc1d8b	Distal	chrX	136286000	136288772	0.34	0.18	0.14	0.22	0.17	0.2	0.4	0.37	0.2525	0.03	0.41	0.47	0.34	0.46	0.28	-0.01	0.01	0.24875	0.0425939	1	25.603	8.4872	0.23344	0.256148	0.256148	2.78	4.364	3.314	3.932	3.92	3.179	4.263	2.819	3.57138	0.986458	1	25.3333	8.7397	3.55244	0.369112	0.103904
Tbc1d8b:136286000.3	Tbc1d8b:136286000	Tbc1d8b	Proximal	chrX	136286000	136288465	0.37	0.59	0.61	0.56	0.63	0.48	0.39	0.38	0.50125	0.03	0.41	0.47	0.34	0.46	0.28	-0.01	0.01	0.24875	0.0425939	1	25.603	8.4872	0.23344	0.256148	0.256148	2.78	4.364	3.314	3.932	3.92	3.179	4.263	2.819	3.57138	0.986458	1	25.3333	8.7397	3.55244	0.369112	0.103904
Tcp1:13117126.4	Tcp1:13117126	Tcp1	Distal	chr17	13117126	13117311	0.01	0.27	0.01	0.01	0.26	0.23	0.45	0.47	0.21375	0.35	0.33	0.44	0.4	0.35	0.31	-0.2	-0.16	0.2275	0.011615	0.806085	24.0313	8.80368	0.227266	0.193189	0.193189	262.272	276.079	240.446	276.453	220.879	261.54	285.746	244.293	258.464	0.997928	1	21.6667	21.3285	257.625	8.51796	0.0330634
Tcp1:13117126.5	Tcp1:13117126	Tcp1	Proximal	chr17	13117126	13117190	0.36	0.6	0.45	0.41	0.61	0.54	0.25	0.31	0.44125	0.35	0.33	0.44	0.4	0.35	0.31	-0.2	-0.16	0.2275	0.011615	0.806085	24.0313	8.80368	0.227266	0.193189	0.193189	262.272	276.079	240.446	276.453	220.879	261.54	285.746	244.293	258.464	0.997928	1	21.6667	21.3285	257.625	8.51796	0.0330634
Tgfbr3:107538776.1	Tgfbr3:107538776	Tgfbr3	Distal	chr5	107535589	107538776	0.44	0.34	0.66	0.68	0.68	0.65	0.54	0.55	0.5675	-0.17	-0.06	-0.51	-0.57	-0.56	-0.51	-0.32	-0.38	-0.385	0.0395474	1	21.8712	20.9478	-0.402261	0.193504	0.193504	#N/A	#N/A	#N/A	#N/A	#N/A	#N/A	#N/A	#N/A	#N/A	#N/A	#N/A	#N/A	#N/A	#N/A	#N/A	#N/A
Tgfbr3:107538776.4	Tgfbr3:107538776	Tgfbr3	Proximal	chr5	107536959	107538776	0.27	0.28	0.15	0.11	0.12	0.14	0.22	0.17	0.1825	-0.17	-0.06	-0.51	-0.57	-0.56	-0.51	-0.32	-0.38	-0.385	0.0395474	1	21.8712	20.9478	-0.402261	0.193504	0.193504	#N/A	#N/A	#N/A	#N/A	#N/A	#N/A	#N/A	#N/A	#N/A	#N/A	#N/A	#N/A	#N/A	#N/A	#N/A	#N/A
Tial1:135586173.2	Tial1:135586173	Tial1	Distal	chr7	135583286	135586173	0.28	0.24	0.17	0.25	0.24	0.47	0.48	0.33	0.3075	0.27	0.39	0.56	0.41	0.36	-0.11	-0.15	0.19	0.24	0.0117906	0.806085	22.2697	7.34057	0.251575	0.250443	0.250443	17.067	13.344	14.153	16.782	15.639	19.486	22.464	15.961	16.862	0.315181	1	22.2697	17.5388	16.7721	3.02987	0.180649
Tial1:135586173.5	Tial1:135586173	Tial1	Proximal	chr7	135585794	135586173	0.55	0.63	0.73	0.66	0.6	0.36	0.33	0.52	0.5475	0.27	0.39	0.56	0.41	0.36	-0.11	-0.15	0.19	0.24	0.0117906	0.806085	22.2697	7.34057	0.251575	0.250443	0.250443	17.067	13.344	14.153	16.782	15.639	19.486	22.464	15.961	16.862	0.315181	1	22.2697	17.5388	16.7721	3.02987	0.180649
Tifa:127499487.1	Tifa:127499487	Tifa	Distal	chr3	127499487	127501307	0.46	0.46	0.39	0.68	0.83	0.77	0.49	0.3	0.5475	0.08	0.08	0.22	-0.36	-0.66	-0.54	0.02	0.4	-0.095	0.00823901	0.789455	20.3647	2.87554	-0.150014	0.524449	0.524449	16.566	31.739	17.099	23.184	14.617	11.473	12.527	11.228	17.3041	0.581197	1	23.5932	5.44866	17.3263	5.69713	0.328814
Tifa:127499487.2	Tifa:127499487	Tifa	Proximal	chr3	127499487	127500872	0.54	0.54	0.61	0.32	0.17	0.23	0.51	0.7	0.4525	0.08	0.08	0.22	-0.36	-0.66	-0.54	0.02	0.4	-0.095	0.00823901	0.789455	20.3647	2.87554	-0.150014	0.524449	0.524449	16.566	31.739	17.099	23.184	14.617	11.473	12.527	11.228	17.3041	0.581197	1	23.5932	5.44866	17.3263	5.69713	0.328814
Tm9sf3:41289629.8	Tm9sf3:41289629	Tm9sf3	Distal	chr19	41289177	41289629	0.2	0.19	0.12	0.07	0.1	0.08	0.18	0.3	0.155	0.2	0.11	0.29	0.39	0.4	0.44	0.22	0	0.25625	0.00481237	0.710856	20.5351	12	0.280955	0.193159	0.193159	21.261	26.692	22.01	26.894	25.462	26.043	32.134	20.145	25.0801	0.982587	1	24.46	14.6067	25.0481	3.30284	0.13186
Tm9sf3:41289629.9	Tm9sf3:41289629	Tm9sf3	Proximal	chr19	41289208	41289629	0.4	0.3	0.41	0.46	0.5	0.52	0.4	0.3	0.41125	0.2	0.11	0.29	0.39	0.4	0.44	0.22	0	0.25625	0.00481237	0.710856	20.5351	12	0.280955	0.193159	0.193159	21.261	26.692	22.01	26.894	25.462	26.043	32.134	20.145	25.0801	0.982587	1	24.46	14.6067	25.0481	3.30284	0.13186
Tmem161b:84434208.3	Tmem161b:84434208	Tmem161b	Distal	chr13	84434208	84435413	0.27	0.28	0.26	0.25	0.21	0.15	0.21	0.26	0.23625	0.06	0.08	0.18	0.26	0.36	0.53	0.24	0.2	0.23875	0.0095296	0.795442	22.8282	13.9534	0.244075	0.183147	0.183147	1.53	1.272	1.412	1.809	2.224	1.737	2.12	1.455	1.69487	0.101791	1	22.2697	13.8664	1.71199	0.399866	0.233568
Tmem161b:84434208.4	Tmem161b:84434208	Tmem161b	Proximal	chr13	84434208	84434586	0.33	0.36	0.44	0.51	0.57	0.68	0.45	0.46	0.475	0.06	0.08	0.18	0.26	0.36	0.53	0.24	0.2	0.23875	0.0095296	0.795442	22.8282	13.9534	0.244075	0.183147	0.183147	1.53	1.272	1.412	1.809	2.224	1.737	2.12	1.455	1.69487	0.101791	1	22.2697	13.8664	1.71199	0.399866	0.233568
Tmem168:13533334.4	Tmem168:13533334	Tmem168	Distal	chr6	13531110	13533334	0.23	0.17	0.16	0.09	0.13	0.18	0.2	0.16	0.165	0.05	0.28	0.4	0.45	0.36	0.4	0.17	0.25	0.295	0.0230774	0.896864	21.6944	9.92553	0.309497	0.151041	0.151041	5.629	6.114	6.196	8.57	6.687	7.563	8.033	6.9	6.9615	0.735411	1	24.3817	11.5589	6.95173	0.622609	0.0895618
Tmem168:13533334.5	Tmem168:13533334	Tmem168	Proximal	chr6	13531294	13533334	0.28	0.45	0.56	0.54	0.49	0.58	0.37	0.41	0.46	0.05	0.28	0.4	0.45	0.36	0.4	0.17	0.25	0.295	0.0230774	0.896864	21.6944	9.92553	0.309497	0.151041	0.151041	5.629	6.114	6.196	8.57	6.687	7.563	8.033	6.9	6.9615	0.735411	1	24.3817	11.5589	6.95173	0.622609	0.0895618
Traf4:77974050.3	Traf4:77974050	Traf4	Distal	chr11	77972285	77974050	0.22	0.19	0.22	0.06	0.11	0.13	0.2	0.19	0.165	0.42	0.4	0.43	0.68	0.59	0.52	0.39	0.37	0.475	0.00883111	0.789455	21.5023	10.9594	0.488194	0.12666	0.12666	14.108	16.553	31.813	29.79	24.998	22.263	19.5	23.664	22.8361	0.283778	1	21.6667	9.45323	23.4387	6.4133	0.273621
Traf4:77974050.4	Traf4:77974050	Traf4	Proximal	chr11	77972907	77974050	0.64	0.59	0.65	0.74	0.7	0.65	0.59	0.56	0.64	0.42	0.4	0.43	0.68	0.59	0.52	0.39	0.37	0.475	0.00883111	0.789455	21.5023	10.9594	0.488194	0.12666	0.12666	14.108	16.553	31.813	29.79	24.998	22.263	19.5	23.664	22.8361	0.283778	1	21.6667	9.45323	23.4387	6.4133	0.273621
Trim56:137588261.1	Trim56:137588261	Trim56	Distal	chr5	137581514	137588261	0.71	0.76	0.84	0.79	0.76	0.78	0.68	0.61	0.74125	-0.56	-0.61	-0.76	-0.68	-0.62	-0.68	-0.54	-0.35	-0.6	0.0368843	1	26.2054	22.115	-0.588754	0.129305	0.129305	4.58	6.722	7.769	5.508	6.658	5.2	3.808	4.406	5.58137	0.0736806	0.869015	22.7817	7.37695	5.63208	1.49713	0.265821
Trim56:137588261.2	Trim56:137588261	Trim56	Proximal	chr5	137584459	137588261	0.15	0.15	0.08	0.11	0.14	0.1	0.14	0.26	0.14125	-0.56	-0.61	-0.76	-0.68	-0.62	-0.68	-0.54	-0.35	-0.6	0.0368843	1	26.2054	22.115	-0.588754	0.129305	0.129305	4.58	6.722	7.769	5.508	6.658	5.2	3.808	4.406	5.58137	0.0736806	0.869015	22.7817	7.37695	5.63208	1.49713	0.265821
Tspan4:148678784.1	Tspan4:148678784	Tspan4	Distal	chr7	148678784	148679321	0.33	0.52	0.38	0.31	0.17	0.17	0.26	0.26	0.3	0.34	-0.04	0.24	0.38	0.66	0.66	0.48	0.48	0.4	0.0419505	1	23.5742	14.6341	0.402184	0.265317	0.265317	11.389	12.03	14.865	17.49	23.244	35.429	19.419	25.652	19.9398	0.254677	1	24.0137	14.6199	19.9381	6.13082	0.307493
Tspan4:148678784.2	Tspan4:148678784	Tspan4	Proximal	chr7	148678784	148679285	0.67	0.48	0.62	0.69	0.83	0.83	0.74	0.74	0.7	0.34	-0.04	0.24	0.38	0.66	0.66	0.48	0.48	0.4	0.0419505	1	23.5742	14.6341	0.402184	0.265317	0.265317	11.389	12.03	14.865	17.49	23.244	35.429	19.419	25.652	19.9398	0.254677	1	24.0137	14.6199	19.9381	6.13082	0.307493
Tspyl1:34001996.2	Tspyl1:34001996	Tspyl1	Distal	chr10	34001996	34004692	0.24	0.2	0.23	0.23	0.54	0.56	0.31	0.27	0.3225	0.43	0.51	0.47	0.42	-0.16	-0.23	0.3	0.37	0.26375	0.0109219	0.806085	22.7287	3.4319	0.255241	0.419642	0.419642	91.984	72.412	67.963	70.4	66.107	61.724	84.594	56.321	71.4381	0.938854	1	24.3333	23.0366	71.5087	4.98053	0.0696493
Tspyl1:34001996.3	Tspyl1:34001996	Tspyl1	Proximal	chr10	34001996	34004639	0.67	0.71	0.7	0.65	0.38	0.33	0.61	0.64	0.58625	0.43	0.51	0.47	0.42	-0.16	-0.23	0.3	0.37	0.26375	0.0109219	0.806085	22.7287	3.4319	0.255241	0.419642	0.419642	91.984	72.412	67.963	70.4	66.107	61.724	84.594	56.321	71.4381	0.938854	1	24.3333	23.0366	71.5087	4.98053	0.0696493
Ttpal:163441099.1	Ttpal:163441099	Ttpal	Distal	chr2	163441099	163444749	0.58	0.69	0.67	0.79	0.75	0.76	0.7	0.66	0.7	-0.39	-0.57	-0.56	-0.7	-0.66	-0.67	-0.61	-0.52	-0.585	0.0196152	0.896864	24.7677	24.2512	-0.581506	0.113556	0.113556	11.605	11.305	9.795	9.761	16.138	15.505	12.835	12.658	12.4502	0.476698	1	21.7287	15.5311	12.483	2.94884	0.236229
Ttpal:163441099.3	Ttpal:163441099	Ttpal	Proximal	chr2	163441099	163442839	0.19	0.12	0.11	0.09	0.09	0.09	0.09	0.14	0.115	-0.39	-0.57	-0.56	-0.7	-0.66	-0.67	-0.61	-0.52	-0.585	0.0196152	0.896864	24.7677	24.2512	-0.581506	0.113556	0.113556	11.605	11.305	9.795	9.761	16.138	15.505	12.835	12.658	12.4502	0.476698	1	21.7287	15.5311	12.483	2.94884	0.236229
Ubac1:25854587.1	Ubac1:25854587	Ubac1	Distal	chr2	25854067	25854587	0.71	0.83	0.84	0.9	0.9	0.91	0.89	0.71	0.83625	-0.42	-0.66	-0.68	-0.8	-0.8	-0.82	-0.78	-0.42	-0.6725	0.0189167	0.896864	25.3409	25.208	-0.661771	0.215415	0.215415	4.753	3.379	3.943	5.054	5.573	5.469	4.281	4.468	4.615	0.182708	1	21.6667	12.9214	4.6768	0.82225	0.175815
Ubac1:25854587.2	Ubac1:25854587	Ubac1	Proximal	chr2	25854141	25854587	0.29	0.17	0.16	0.1	0.1	0.09	0.11	0.29	0.16375	-0.42	-0.66	-0.68	-0.8	-0.8	-0.82	-0.78	-0.42	-0.6725	0.0189167	0.896864	25.3409	25.208	-0.661771	0.215415	0.215415	4.753	3.379	3.943	5.054	5.573	5.469	4.281	4.468	4.615	0.182708	1	21.6667	12.9214	4.6768	0.82225	0.175815
Uck2:169156652.1	Uck2:169156652	Uck2	Distal	chr1	169153021	169156652	0.4	0.41	0.22	0.16	0.23	0.21	0.28	0.37	0.285	-0.18	-0.22	0.08	0.25	0.15	0.16	0.05	-0.16	0.01625	0.00911861	0.789455	23.2618	10.9904	0.0228313	0.210348	0.210348	#N/A	#N/A	#N/A	#N/A	#N/A	#N/A	#N/A	#N/A	#N/A	#N/A	#N/A	#N/A	#N/A	#N/A	#N/A	#N/A
Uck2:169156652.3	Uck2:169156652	Uck2	Proximal	chr1	169156203	169156652	0.22	0.19	0.3	0.41	0.38	0.37	0.33	0.21	0.30125	-0.18	-0.22	0.08	0.25	0.15	0.16	0.05	-0.16	0.01625	0.00911861	0.789455	23.2618	10.9904	0.0228313	0.210348	0.210348	#N/A	#N/A	#N/A	#N/A	#N/A	#N/A	#N/A	#N/A	#N/A	#N/A	#N/A	#N/A	#N/A	#N/A	#N/A	#N/A
Usp45:21761382.2	Usp45:21761382	Usp45	Distal	chr4	21761382	21765017	0.3	0.23	0.29	0.47	0.41	0.46	0.32	0.29	0.34625	0.07	0.2	0.18	-0.13	-0.07	-0.15	-0.01	0.15	0.03	0.0204232	0.896864	21.6667	2.95495	0.0190473	0.192214	0.192214	3.208	2.363	2.829	4.308	3.324	3.116	3.397	2.699	3.1555	0.72426	1	20.4558	11.4999	3.22017	0.466015	0.144717
Usp45:21761382.3	Usp45:21761382	Usp45	Proximal	chr4	21761382	21764949	0.37	0.43	0.47	0.34	0.34	0.31	0.31	0.44	0.37625	0.07	0.2	0.18	-0.13	-0.07	-0.15	-0.01	0.15	0.03	0.0204232	0.896864	21.6667	2.95495	0.0190473	0.192214	0.192214	3.208	2.363	2.829	4.308	3.324	3.116	3.397	2.699	3.1555	0.72426	1	20.4558	11.4999	3.22017	0.466015	0.144717
Usp6nl:6361407.2	Usp6nl:6361407	Usp6nl	Distal	chr2	6361407	6367436	0.18	0.27	0.4	0.47	0.26	0.17	0.22	0.11	0.26	-0.04	-0.11	-0.17	-0.39	-0.13	-0.02	-0.04	0.12	-0.0975	0.0206351	0.896864	22.8712	20.6306	-0.104276	0.150147	0.150147	1.751	1.876	1.63	1.376	1.54	1.489	1.852	1.627	1.64263	0.290111	1	21.4099	1.07273	1.62588	0.165388	0.101723
Usp6nl:6361407.8	Usp6nl:6361407	Usp6nl	Proximal	chr2	6361407	6362836	0.14	0.16	0.23	0.08	0.13	0.15	0.18	0.23	0.1625	-0.04	-0.11	-0.17	-0.39	-0.13	-0.02	-0.04	0.12	-0.0975	0.0206351	0.896864	22.8712	20.6306	-0.104276	0.150147	0.150147	1.751	1.876	1.63	1.376	1.54	1.489	1.852	1.627	1.64263	0.290111	1	21.4099	1.07273	1.62588	0.165388	0.101723
Vps13c:67843095.1	Vps13c:67843095	Vps13c	Distal	chr9	67843095	67845549	0.77	0.77	0.83	0.91	0.83	0.85	0.82	0.73	0.81375	-0.54	-0.54	-0.66	-0.82	-0.66	-0.7	-0.64	-0.46	-0.6275	0.0183918	0.896864	23.9138	22.6053	-0.627973	0.128323	0.128323	1.251	2.06	1.97	2.095	1.477	1.245	1.64	1.49	1.6535	0.594515	1	21.6667	6.35697	1.67041	0.4759	0.284899
Vps13c:67843095.2	Vps13c:67843095	Vps13c	Proximal	chr9	67843095	67843445	0.23	0.23	0.17	0.09	0.17	0.15	0.18	0.27	0.18625	-0.54	-0.54	-0.66	-0.82	-0.66	-0.7	-0.64	-0.46	-0.6275	0.0183918	0.896864	23.9138	22.6053	-0.627973	0.128323	0.128323	1.251	2.06	1.97	2.095	1.477	1.245	1.64	1.49	1.6535	0.594515	1	21.6667	6.35697	1.67041	0.4759	0.284899
Vps26a:61919606.2	Vps26a:61919606	Vps26a	Distal	chr10	61917980	61919606	0.32	0.19	0.13	0.15	0.12	0.21	0.15	0.23	0.1875	0.07	0.2	0.39	0.4	0.38	0.32	0.36	0.19	0.28875	0.0113495	0.806085	23.7677	10.064	0.290086	0.135318	0.135318	7.752	7.382	7.896	9.187	12.027	10.195	9.82	8.232	9.06137	0.00414646	0.218328	23.2697	13.3762	9.10497	1.95742	0.214983
Vps26a:61919606.3	Vps26a:61919606	Vps26a	Proximal	chr10	61918015	61919606	0.39	0.39	0.52	0.55	0.5	0.53	0.51	0.42	0.47625	0.07	0.2	0.39	0.4	0.38	0.32	0.36	0.19	0.28875	0.0113495	0.806085	23.7677	10.064	0.290086	0.135318	0.135318	7.752	7.382	7.896	9.187	12.027	10.195	9.82	8.232	9.06137	0.00414646	0.218328	23.2697	13.3762	9.10497	1.95742	0.214983
Wasl:24566346.1	Wasl:24566346	Wasl	Distal	chr6	24563815	24566346	0.54	0.39	0.45	0.49	0.64	0.64	0.69	0.52	0.545	-0.26	0.08	-0.04	-0.16	-0.41	-0.42	-0.57	-0.19	-0.24625	0.0412775	1	22.1264	4.85277	-0.247056	0.308889	0.308889	8.569	9.155	8.859	11.473	9.482	9.875	11.837	8.543	9.72413	0.93474	1	23.7677	11.7165	9.73117	0.747329	0.0767975
Wasl:24566346.2	Wasl:24566346	Wasl	Proximal	chr6	24564491	24566346	0.28	0.47	0.41	0.33	0.23	0.22	0.12	0.33	0.29875	-0.26	0.08	-0.04	-0.16	-0.41	-0.42	-0.57	-0.19	-0.24625	0.0412775	1	22.1264	4.85277	-0.247056	0.308889	0.308889	8.569	9.155	8.859	11.473	9.482	9.875	11.837	8.543	9.72413	0.93474	1	23.7677	11.7165	9.73117	0.747329	0.0767975
Yes1:32986924.4	Yes1:32986924	Yes1	Distal	chr5	32986924	32989682	0.17	0.13	0.12	0.1	0.06	0.16	0.2	0.2	0.1425	0.45	0.62	0.63	0.71	0.8	0.53	0.42	0.35	0.56375	0.00163974	0.670953	23.6049	10.0166	0.566697	0.175803	0.175803	4.271	4.794	6.596	5.431	5.221	4.063	5.576	3.857	4.97612	0.800014	1	22.5371	8.16966	5.0155	0.793383	0.158186
Yes1:32986924.5	Yes1:32986924	Yes1	Proximal	chr5	32986924	32989430	0.62	0.75	0.75	0.81	0.86	0.69	0.62	0.55	0.70625	0.45	0.62	0.63	0.71	0.8	0.53	0.42	0.35	0.56375	0.00163974	0.670953	23.6049	10.0166	0.566697	0.175803	0.175803	4.271	4.794	6.596	5.431	5.221	4.063	5.576	3.857	4.97612	0.800014	1	22.5371	8.16966	5.0155	0.793383	0.158186
Yipf4:74898311.2	Yipf4:74898311	Yipf4	Distal	chr17	74898311	74899300	0.6	0.48	0.41	0.55	0.58	0.56	0.82	0.64	0.58	-0.44	-0.12	-0.03	-0.12	-0.18	-0.24	-0.67	-0.39	-0.27375	0.0381608	1	23.5742	7.52724	-0.270405	0.261554	0.261554	17.683	19.017	16.078	22.515	20.034	20.883	26.209	20.219	20.3297	0.752494	1	25.0985	16.9131	20.3334	2.27724	0.111995
Yipf4:74898311.3	Yipf4:74898311	Yipf4	Proximal	chr17	74898311	74898712	0.16	0.36	0.38	0.43	0.4	0.32	0.15	0.25	0.30625	-0.44	-0.12	-0.03	-0.12	-0.18	-0.24	-0.67	-0.39	-0.27375	0.0381608	1	23.5742	7.52724	-0.270405	0.261554	0.261554	17.683	19.017	16.078	22.515	20.034	20.883	26.209	20.219	20.3297	0.752494	1	25.0985	16.9131	20.3334	2.27724	0.111995
Zbtb33:35545392.2	Zbtb33:35545392	Zbtb33	Distal	chrX	35545392	35550223	0.73	0.78	0.48	0.61	0.68	0.8	0.86	0.86	0.725	-0.48	-0.58	0.03	-0.23	-0.38	-0.61	-0.73	-0.73	-0.46375	0.0275529	0.947076	22.6333	8.17346	-0.451113	0.271557	0.271557	53.299	47.884	44.377	59.791	56.467	48.692	62.65	47.003	52.5204	0.981202	1	22.7287	12.7378	52.6847	3.71963	0.0706016
Zbtb33:35545392.3	Zbtb33:35545392	Zbtb33	Proximal	chrX	35545392	35547864	0.25	0.2	0.51	0.38	0.3	0.19	0.13	0.13	0.26125	-0.48	-0.58	0.03	-0.23	-0.38	-0.61	-0.73	-0.73	-0.46375	0.0275529	0.947076	22.6333	8.17346	-0.451113	0.271557	0.271557	53.299	47.884	44.377	59.791	56.467	48.692	62.65	47.003	52.5204	0.981202	1	22.7287	12.7378	52.6847	3.71963	0.0706016
Zc3h12c:51924907.1	Zc3h12c:51924907	Zc3h12c	Distal	chr9	51917674	51924907	0.18	0.18	0.15	0.27	0.3	0.36	0.24	0.19	0.23375	0.08	0.19	0.1	0.02	-0.02	-0.26	-0.07	0.1	0.0175	0.024594	0.922165	22.0569	3.23938	0.0105056	0.177834	0.177834	#N/A	#N/A	#N/A	#N/A	#N/A	#N/A	#N/A	#N/A	#N/A	#N/A	#N/A	#N/A	#N/A	#N/A	#N/A	#N/A
Zc3h12c:51924907.3	Zc3h12c:51924907	Zc3h12c	Proximal	chr9	51918027	51924907	0.26	0.37	0.25	0.29	0.28	0.1	0.17	0.29	0.25125	0.08	0.19	0.1	0.02	-0.02	-0.26	-0.07	0.1	0.0175	0.024594	0.922165	22.0569	3.23938	0.0105056	0.177834	0.177834	#N/A	#N/A	#N/A	#N/A	#N/A	#N/A	#N/A	#N/A	#N/A	#N/A	#N/A	#N/A	#N/A	#N/A	#N/A	#N/A
Zfp259:46089121.2	Zfp259:46089121	Zfp259	Distal	chr9	46089121	46089685	0.32	0.19	0.09	0.05	0.22	0.3	0.25	0.48	0.2375	0.25	0.5	0.71	0.7	0.37	0.24	0.33	-0.09	0.37625	0.0356824	1	25.8186	7.96339	0.357784	0.294652	0.294652	19.728	18.303	31.284	34.547	31.856	26.586	25.27	26.789	26.7954	0.053934	0.738353	20.5972	9.74826	27.6491	6.24674	0.225929
Zfp259:46089121.3	Zfp259:46089121	Zfp259	Proximal	chr9	46089121	46089587	0.57	0.69	0.8	0.75	0.59	0.54	0.58	0.39	0.61375	0.25	0.5	0.71	0.7	0.37	0.24	0.33	-0.09	0.37625	0.0356824	1	25.8186	7.96339	0.357784	0.294652	0.294652	19.728	18.303	31.284	34.547	31.856	26.586	25.27	26.789	26.7954	0.053934	0.738353	20.5972	9.74826	27.6491	6.24674	0.225929
Zfp574:25864554.2	Zfp574:25864554	Zfp574	Distal	chr7	25864554	25868085	0.27	0.15	0.14	0.11	0.1	0.2	0.17	0.39	0.19125	0.32	0.53	0.6	0.7	0.66	0.4	0.57	0.06	0.48	0.0407053	1	24.7677	10.0601	0.472762	0.222595	0.222595	6.106	8.296	9.111	8.317	9.836	9.219	8.25	7.908	8.38037	0.0317239	0.574571	26.2024	11.9547	8.27502	1.20953	0.146166
Zfp574:25864554.3	Zfp574:25864554	Zfp574	Proximal	chr7	25864554	25867500	0.59	0.68	0.74	0.81	0.76	0.6	0.74	0.45	0.67125	0.32	0.53	0.6	0.7	0.66	0.4	0.57	0.06	0.48	0.0407053	1	24.7677	10.0601	0.472762	0.222595	0.222595	6.106	8.296	9.111	8.317	9.836	9.219	8.25	7.908	8.38037	0.0317239	0.574571	26.2024	11.9547	8.27502	1.20953	0.146166
Zfp687:94811888.3	Zfp687:94811888	Zfp687	Distal	chr3	94810623	94811888	0.3	0.31	0.19	0.34	0.27	0.29	0.54	0.29	0.31625	0.05	0.17	0.22	0.15	0.13	0	-0.32	0.1	0.0625	0.0277395	0.947076	22.1973	7.01128	0.0696745	0.170105	0.170105	6.499	8.783	11.25	7.541	8.996	8.694	7.866	7.056	8.33563	0.828994	1	24.46	8.12427	8.31368	1.3637	0.164031
Zfp687:94811888.4	Zfp687:94811888	Zfp687	Proximal	chr3	94810753	94811888	0.35	0.48	0.41	0.49	0.4	0.29	0.22	0.39	0.37875	0.05	0.17	0.22	0.15	0.13	0	-0.32	0.1	0.0625	0.0277395	0.947076	22.1973	7.01128	0.0696745	0.170105	0.170105	6.499	8.783	11.25	7.541	8.996	8.694	7.866	7.056	8.33563	0.828994	1	24.46	8.12427	8.31368	1.3637	0.164031
Zfp738:67772548.2	Zfp738:67772548	Zfp738	Distal	chr13	67768777	67772548	0.31	0.67	0.7	0.75	0.6	0.58	0.29	0.49	0.54875	0.24	-0.53	-0.51	-0.62	-0.45	-0.43	-0.03	-0.21	-0.3175	0.0445581	1	21.3772	19.8587	-0.350288	0.322013	0.322013	3.667	3.087	2.324	2.811	1.72	2.309	2.526	2.848	2.6615	0.0378188	0.6151	24.8753	0.0345779	2.68107	0.597709	0.222936
Zfp738:67772548.3	Zfp738:67772548	Zfp738	Proximal	chr13	67769510	67772548	0.55	0.14	0.19	0.13	0.15	0.15	0.26	0.28	0.23125	0.24	-0.53	-0.51	-0.62	-0.45	-0.43	-0.03	-0.21	-0.3175	0.0445581	1	21.3772	19.8587	-0.350288	0.322013	0.322013	3.667	3.087	2.324	2.811	1.72	2.309	2.526	2.848	2.6615	0.0378188	0.6151	24.8753	0.0345779	2.68107	0.597709	0.222936
Zfp952:33139703.1	Zfp952:33139703	Zfp952	Distal	chr17	33139703	33142402	0.49	0.36	0.34	0.33	0.23	0.4	0.42	0.5	0.38375	0.02	0.28	0.32	0.34	0.54	0.2	0.16	0	0.2325	0.00500956	0.710856	24.2667	10.6073	0.230137	0.207517	0.207517	5.066	5.728	4.836	6.509	6.65	7.272	7.352	5.966	6.17237	0.19042	1	24.1733	15.5885	6.17027	1.1571	0.187527
Zfp952:33139703.2	Zfp952:33139703	Zfp952	Proximal	chr17	33139703	33142194	0.51	0.64	0.66	0.67	0.77	0.6	0.58	0.5	0.61625	0.02	0.28	0.32	0.34	0.54	0.2	0.16	0	0.2325	0.00500956	0.710856	24.2667	10.6073	0.230137	0.207517	0.207517	5.066	5.728	4.836	6.509	6.65	7.272	7.352	5.966	6.17237	0.19042	1	24.1733	15.5885	6.17027	1.1571	0.187527
Zmym5:57413337.1	Zmym5:57413337	Zmym5	Distal	chr14	57409437	57413337	0.36	0.45	0.36	0.29	0.19	0.14	0.31	0.48	0.3225	-0.1	-0.2	-0.15	0.12	0.06	0.16	-0.03	-0.31	-0.05625	0.0262418	0.947076	20.4099	13.0224	-0.0331994	0.219415	0.219415	12.122	11.67	11.711	14.766	12.309	9.561	16.005	10.905	12.3811	0.999993	1	25.3333	11.6639	12.3616	0.358989	0.0290405
Zmym5:57413337.4	Zmym5:57413337	Zmym5	Proximal	chr14	57411794	57413337	0.26	0.25	0.21	0.41	0.25	0.3	0.28	0.17	0.26625	-0.1	-0.2	-0.15	0.12	0.06	0.16	-0.03	-0.31	-0.05625	0.0262418	0.947076	20.4099	13.0224	-0.0331994	0.219415	0.219415	12.122	11.67	11.711	14.766	12.309	9.561	16.005	10.905	12.3811	0.999993	1	25.3333	11.6639	12.3616	0.358989	0.0290405
Znrd1as:37101779.1	Znrd1as:37101779	Znrd1as	Distal	chr17	37101779	37102736	0.3	0.14	0.08	0.1	0.15	0.32	0.24	0.21	0.1925	0.4	0.72	0.84	0.8	0.7	0.36	0.52	0.58	0.615	0.0264094	0.947076	21.6667	7.46526	0.630113	0.240933	0.240933	10.602	10.82	10.117	8.352	7.718	8.19	7.329	7.025	8.76913	0.453872	1	25.3333	2.3206	8.78438	0.609635	0.0693999
Znrd1as:37101779.2	Znrd1as:37101779	Znrd1as	Proximal	chr17	37101779	37102568	0.7	0.86	0.92	0.9	0.85	0.68	0.76	0.79	0.8075	0.4	0.72	0.84	0.8	0.7	0.36	0.52	0.58	0.615	0.0264094	0.947076	21.6667	7.46526	0.630113	0.240933	0.240933	10.602	10.82	10.117	8.352	7.718	8.19	7.329	7.025	8.76913	0.453872	1	25.3333	2.3206	8.78438	0.609635	0.0693999

## Sheet: Dataset3_Zhang
Transcript	Isoform	Gene	Proximal/Distal	Chromosome	Start	End	CT_22_MISO_psi	CT_28_MISO_psi	CT_34_MISO_psi	CT_40_MISO_psi	CT_46_MISO_psi	CT_52_MISO_psi	CT_58_MISO_psi	CT_64_MISO_psi	Average_MISO_psi	CT_22_MISO_delta_psi	CT_28_MISO_delta_psi	CT_34_MISO_delta_psi	CT_40_MISO_delta_psi	CT_46_MISO_delta_psi	CT_52_MISO_delta_psi	CT_58_MISO_delta_psi	CT_64_MISO_delta_psi	Average_delta_psi	meta2d_pvalue	meta2d_BH.Q	meta2d_period	meta2d_phase	meta2d_Base	meta2d_AMP	meta2d_rAMP	Zhang_CT22_tag	Zhang_CT28_tag	Zhang_CT34_tag	Zhang_CT40_tag	Zhang_CT46_tag	Zhang_CT52_tag	Zhang_CT58_tag	Zhang_CT64_tag	TPM_AVG	meta2d_pvalue	meta2d_BH.Q	meta2d_period	meta2d_phase	meta2d_Base	meta2d_AMP	meta2d_rAMP
1810013L24Rik:8845870.1	1810013L24Rik:8845870	1810013L24Rik	Distal	chr16	8845870	8852699	0.3	0.18	0.21	0.34	0.22	0.2	0.29	0.35	0.26125	0.4	0.64	0.58	0.32	0.56	0.6	0.42	0.3	0.4775	0.000525563	0.206217	22.2244	8.18888	0.488359	0.148103	0.148103	17.71	22.211	21.045	15.396	15.624	23.575	20.746	12.881	18.6485	5.65574e-05	0.0119232	23.882	6.35813	18.6738	4.73194	0.2534
1810013L24Rik:8845870.2	1810013L24Rik:8845870	1810013L24Rik	Proximal	chr16	8845870	8851792	0.7	0.82	0.79	0.66	0.78	0.8	0.71	0.65	0.73875	0.4	0.64	0.58	0.32	0.56	0.6	0.42	0.3	0.4775	0.000525563	0.206217	22.2244	8.18888	0.488359	0.148103	0.148103	17.71	22.211	21.045	15.396	15.624	23.575	20.746	12.881	18.6485	5.65574e-05	0.0119232	23.882	6.35813	18.6738	4.73194	0.2534
2200002D01Rik:30032753.4	2200002D01Rik:30032753	2200002D01Rik	Distal	chr7	30031935	30032753	0.56	0.68	0.57	0.5	0.59	0.72	0.46	0.52	0.575	-0.42	-0.56	-0.35	-0.17	-0.42	-0.59	-0.22	-0.37	-0.3875	0.0144085	0.524725	21.9634	17.9089	-0.39713	0.16933	0.16933	43.203	35.611	30.382	43.407	39.444	31.849	34.99	25.65	35.567	0.849677	1	23.3333	12.5474	35.5497	1.65236	0.0464804
2200002D01Rik:30032753.6	2200002D01Rik:30032753	2200002D01Rik	Proximal	chr7	30032581	30032753	0.14	0.12	0.22	0.33	0.17	0.13	0.24	0.15	0.1875	-0.42	-0.56	-0.35	-0.17	-0.42	-0.59	-0.22	-0.37	-0.3875	0.0144085	0.524725	21.9634	17.9089	-0.39713	0.16933	0.16933	43.203	35.611	30.382	43.407	39.444	31.849	34.99	25.65	35.567	0.849677	1	23.3333	12.5474	35.5497	1.65236	0.0464804
2700078K21Rik:149195483.2	2700078K21Rik:149195483	2700078K21Rik	Distal	chr7	149194455	149195483	0.59	0.4	0.39	0.46	0.48	0.32	0.18	0.29	0.38875	-0.3	0.05	0.09	-0.12	-0.06	0.28	0.55	0.31	0.1	0.00175435	0.289956	25.2144	7.5955	0.0909333	0.200803	0.200803	2.76	2.845	2.76	2.26	2.229	2.815	2.496	2.215	2.5475	0.0331485	0.195736	25.1383	4.24301	2.5333	0.285603	0.11274
2700078K21Rik:149195483.3	2700078K21Rik:149195483	2700078K21Rik	Proximal	chr7	149194931	149195483	0.29	0.45	0.48	0.34	0.42	0.6	0.73	0.6	0.48875	-0.3	0.05	0.09	-0.12	-0.06	0.28	0.55	0.31	0.1	0.00175435	0.289956	25.2144	7.5955	0.0909333	0.200803	0.200803	2.76	2.845	2.76	2.26	2.229	2.815	2.496	2.215	2.5475	0.0331485	0.195736	25.1383	4.24301	2.5333	0.285603	0.11274
4833442J19Rik:149093052.1	4833442J19Rik:149093052	4833442J19Rik	Distal	chr6	149093052	149094470	0.09	0.22	0.23	0.23	0.17	0.24	0.32	0.2	0.2125	0.82	0.56	0.54	0.54	0.66	0.52	0.36	0.6	0.575	0.02927	0.636987	23.7405	21.5681	0.573722	0.129713	0.129713	85.85	32.698	90.163	94.992	95.344	42.064	94.167	74.124	76.1753	0.481484	1	23.0248	16.9897	75.3844	25.6056	0.339667
4833442J19Rik:149093052.2	4833442J19Rik:149093052	4833442J19Rik	Proximal	chr6	149093052	149093656	0.91	0.78	0.77	0.77	0.83	0.76	0.68	0.8	0.7875	0.82	0.56	0.54	0.54	0.66	0.52	0.36	0.6	0.575	0.02927	0.636987	23.7405	21.5681	0.573722	0.129713	0.129713	85.85	32.698	90.163	94.992	95.344	42.064	94.167	74.124	76.1753	0.481484	1	23.0248	16.9897	75.3844	25.6056	0.339667
6530401N04Rik:53100860.7	6530401N04Rik:53100860	6530401N04Rik	Distal	chr12	53099966	53100860	0.1	0.08	0.08	0.24	0.28	0.23	0.23	0.5	0.2175	0.6	0.68	0.62	0.28	0.2	0.34	0.27	-0.25	0.3425	0.0486232	0.798951	25.8798	3.11424	0.327386	0.188913	0.188913	6.638	5.88	5.943	5.294	5.296	5.051	6.475	6.001	5.82225	0.944581	1	23.5258	23.1703	5.82483	0.212539	0.0364885
6530401N04Rik:53100860.8	6530401N04Rik:53100860	6530401N04Rik	Proximal	chr12	53100119	53100860	0.7	0.76	0.7	0.52	0.48	0.57	0.5	0.25	0.56	0.6	0.68	0.62	0.28	0.2	0.34	0.27	-0.25	0.3425	0.0486232	0.798951	25.8798	3.11424	0.327386	0.188913	0.188913	6.638	5.88	5.943	5.294	5.296	5.051	6.475	6.001	5.82225	0.944581	1	23.5258	23.1703	5.82483	0.212539	0.0364885
9630033F20Rik:127038320.1	9630033F20Rik:127038320	9630033F20Rik	Distal	chr6	127035137	127038320	0.57	0.42	0.58	0.59	0.67	0.48	0.49	0.66	0.5575	-0.36	-0.14	-0.41	-0.42	-0.58	-0.28	-0.28	-0.55	-0.3775	0.0135428	0.516223	27.7994	0.977464	-0.402834	0.168389	0.168389	3.95	3.436	4.744	4.119	4.258	3.574	4.778	4.618	4.18462	0.47474	1	23.8198	15.2969	4.18269	0.444882	0.106362
9630033F20Rik:127038320.3	9630033F20Rik:127038320	9630033F20Rik	Proximal	chr6	127036079	127038320	0.21	0.28	0.17	0.17	0.09	0.2	0.21	0.11	0.18	-0.36	-0.14	-0.41	-0.42	-0.58	-0.28	-0.28	-0.55	-0.3775	0.0135428	0.516223	27.7994	0.977464	-0.402834	0.168389	0.168389	3.95	3.436	4.744	4.119	4.258	3.574	4.778	4.618	4.18462	0.47474	1	23.8198	15.2969	4.18269	0.444882	0.106362
Abca8b:109795925.1	Abca8b:109795925	Abca8b	Distal	chr11	109793504	109795925	0.29	0.13	0.1	0.22	0.2	0.1	0.13	0.2	0.17125	0.4	0.69	0.68	0.51	0.56	0.77	0.71	0.58	0.6125	0.00182855	0.289956	23.13	9.1917	0.617685	0.132732	0.132732	8.976	10.381	6.905	3.899	5.999	8.809	5.939	4.306	6.90175	0.00890778	0.0913995	24.4106	3.3021	6.86926	2.45035	0.356712
Abca8b:109795925.2	Abca8b:109795925	Abca8b	Proximal	chr11	109793886	109795925	0.69	0.82	0.78	0.73	0.76	0.87	0.84	0.78	0.78375	0.4	0.69	0.68	0.51	0.56	0.77	0.71	0.58	0.6125	0.00182855	0.289956	23.13	9.1917	0.617685	0.132732	0.132732	8.976	10.381	6.905	3.899	5.999	8.809	5.939	4.306	6.90175	0.00890778	0.0913995	24.4106	3.3021	6.86926	2.45035	0.356712
Abcb1a:8747355.1	Abcb1a:8747355	Abcb1a	Distal	chr5	8747355	8748573	0.57	0.67	0.83	0.82	0.73	0.71	0.87	0.9	0.7625	-0.14	-0.34	-0.66	-0.64	-0.46	-0.42	-0.74	-0.8	-0.525	0.0370417	0.720005	26.46	23.4158	-0.526289	0.197427	0.197427	#N/A	#N/A	#N/A	#N/A	#N/A	#N/A	#N/A	#N/A	#N/A	#N/A	#N/A	#N/A	#N/A	#N/A	#N/A	#N/A
Abcb1a:8747355.2	Abcb1a:8747355	Abcb1a	Proximal	chr5	8747355	8747933	0.43	0.33	0.17	0.18	0.27	0.29	0.13	0.1	0.2375	-0.14	-0.34	-0.66	-0.64	-0.46	-0.42	-0.74	-0.8	-0.525	0.0370417	0.720005	26.46	23.4158	-0.526289	0.197427	0.197427	#N/A	#N/A	#N/A	#N/A	#N/A	#N/A	#N/A	#N/A	#N/A	#N/A	#N/A	#N/A	#N/A	#N/A	#N/A	#N/A
Abi3:95694190.1	Abi3:95694190	Abi3	Distal	chr11	95688057	95694190	0.12	0.07	0.06	0.14	0.09	0.08	0.16	0.19	0.11375	0.6	0.69	0.6	0.32	0.61	0.61	0.42	0.28	0.51625	0.00418289	0.335728	22.9997	5.39976	0.520971	0.154468	0.154468	8.176	8.304	5.629	3.895	9.823	5.886	3.59	4.863	6.27075	0.0145859	0.120522	22.4992	2.52402	6.21844	2.52192	0.405555
Abi3:95694190.3	Abi3:95694190	Abi3	Proximal	chr11	95691409	95694190	0.72	0.76	0.66	0.46	0.7	0.69	0.58	0.47	0.63	0.6	0.69	0.6	0.32	0.61	0.61	0.42	0.28	0.51625	0.00418289	0.335728	22.9997	5.39976	0.520971	0.154468	0.154468	8.176	8.304	5.629	3.895	9.823	5.886	3.59	4.863	6.27075	0.0145859	0.120522	22.4992	2.52402	6.21844	2.52192	0.405555
Acad8:26783345.1	Acad8:26783345	Acad8	Distal	chr9	26781734	26783345	0.25	0.19	0.23	0.16	0.16	0.22	0.18	0.2	0.19875	0.29	0.18	0.35	0.42	0.3	0.14	0.49	0.46	0.32875	0.0334977	0.687266	22.9668	16.6785	0.324663	0.141169	0.141169	20.685	22.995	18.998	17.519	17.95	20.595	15.914	13.827	18.5604	0.0390328	0.217539	23.6401	4.17326	18.5855	2.40799	0.129563
Acad8:26783345.3	Acad8:26783345	Acad8	Proximal	chr9	26782739	26783345	0.54	0.37	0.58	0.58	0.46	0.36	0.67	0.66	0.5275	0.29	0.18	0.35	0.42	0.3	0.14	0.49	0.46	0.32875	0.0334977	0.687266	22.9668	16.6785	0.324663	0.141169	0.141169	20.685	22.995	18.998	17.519	17.95	20.595	15.914	13.827	18.5604	0.0390328	0.217539	23.6401	4.17326	18.5855	2.40799	0.129563
Ado:67011703.1	Ado:67011703	Ado	Distal	chr10	67007259	67011703	0.66	0.79	0.84	0.66	0.53	0.7	0.76	0.74	0.71	-0.43	-0.72	-0.8	-0.41	-0.15	-0.51	-0.68	-0.66	-0.545	0.0222349	0.578201	27.3333	18.4264	-0.513295	0.288942	0.288942	28.956	18.357	19.834	23.351	27.948	21.629	16.056	17.32	21.6814	0.00967268	0.0955763	27.7785	17.9213	22.3722	5.61271	0.250879
Ado:67011703.2	Ado:67011703	Ado	Proximal	chr10	67007879	67011703	0.23	0.07	0.04	0.25	0.38	0.19	0.08	0.08	0.165	-0.43	-0.72	-0.8	-0.41	-0.15	-0.51	-0.68	-0.66	-0.545	0.0222349	0.578201	27.3333	18.4264	-0.513295	0.288942	0.288942	28.956	18.357	19.834	23.351	27.948	21.629	16.056	17.32	21.6814	0.00967268	0.0955763	27.7785	17.9213	22.3722	5.61271	0.250879
Adra1a:67350401.4	Adra1a:67350401	Adra1a	Distal	chr14	67350401	67353326	0.5	0.57	0.25	0.28	0.43	0.45	0.29	0.26	0.37875	-0.27	-0.45	0.07	0.02	-0.3	-0.37	-0.06	-0.12	-0.185	0.0221067	0.578201	23.2511	15.5852	-0.188495	0.233935	0.233935	#N/A	#N/A	#N/A	#N/A	#N/A	#N/A	#N/A	#N/A	#N/A	#N/A	#N/A	#N/A	#N/A	#N/A	#N/A	#N/A
Adra1a:67350401.5	Adra1a:67350401	Adra1a	Proximal	chr14	67350401	67351153	0.23	0.12	0.32	0.3	0.13	0.08	0.23	0.14	0.19375	-0.27	-0.45	0.07	0.02	-0.3	-0.37	-0.06	-0.12	-0.185	0.0221067	0.578201	23.2511	15.5852	-0.188495	0.233935	0.233935	#N/A	#N/A	#N/A	#N/A	#N/A	#N/A	#N/A	#N/A	#N/A	#N/A	#N/A	#N/A	#N/A	#N/A	#N/A	#N/A
Aebp2:140599837.2	Aebp2:140599837	Aebp2	Distal	chr6	140599837	140603813	0.38	0.35	0.4	0.71	0.5	0.35	0.38	0.49	0.445	-0.02	0.02	-0.23	-0.63	-0.32	-0.01	-0.05	-0.33	-0.19625	0.0269245	0.613473	27.3333	0.494757	-0.23411	0.295405	0.295405	6.612	6.365	7.907	5.26	5.815	6.308	7.084	4.361	6.214	0.301696	0.826285	22.0237	10.396	6.30096	0.990566	0.157209
Aebp2:140599837.7	Aebp2:140599837	Aebp2	Proximal	chr6	140599837	140601347	0.36	0.37	0.17	0.08	0.18	0.34	0.33	0.16	0.24875	-0.02	0.02	-0.23	-0.63	-0.32	-0.01	-0.05	-0.33	-0.19625	0.0269245	0.613473	27.3333	0.494757	-0.23411	0.295405	0.295405	6.612	6.365	7.907	5.26	5.815	6.308	7.084	4.361	6.214	0.301696	0.826285	22.0237	10.396	6.30096	0.990566	0.157209
Aff4:53228890.1	Aff4:53228890	Aff4	Distal	chr11	53228890	53235830	0.58	0.21	0.08	0.36	0.53	0.12	0.06	0.56	0.3125	-0.41	0.33	0.66	-0.31	-0.5	-0.06	0.65	-0.43	-0.00875	0.00135028	0.289956	24.4554	8.15518	-0.0207918	0.645584	0.645584	9.916	10.962	11.547	7.327	8.028	8.572	9.221	5.841	8.92675	0.104189	0.410341	26.3536	4.18297	8.75873	1.6808	0.191899
Aff4:53228890.3	Aff4:53228890	Aff4	Proximal	chr11	53228890	53234749	0.17	0.54	0.74	0.05	0.03	0.06	0.71	0.13	0.30375	-0.41	0.33	0.66	-0.31	-0.5	-0.06	0.65	-0.43	-0.00875	0.00135028	0.289956	24.4554	8.15518	-0.0207918	0.645584	0.645584	9.916	10.962	11.547	7.327	8.028	8.572	9.221	5.841	8.92675	0.104189	0.410341	26.3536	4.18297	8.75873	1.6808	0.191899
Agpat1:34749198.1	Agpat1:34749198	Agpat1	Distal	chr17	34749198	34750368	0.75	0.8	0.74	0.66	0.93	0.79	0.64	0.78	0.76125	-0.5	-0.6	-0.48	-0.32	-0.86	-0.58	-0.28	-0.56	-0.5225	0.038188	0.73009	21.9717	14.183	-0.515005	0.219434	0.219434	12.472	9.041	18.65	18.216	17.994	15.481	16.134	18.973	15.8701	0.223508	0.684761	26.9855	12.9664	16.1617	3.08726	0.191024
Agpat1:34749198.2	Agpat1:34749198	Agpat1	Proximal	chr17	34749198	34749668	0.25	0.2	0.26	0.34	0.07	0.21	0.36	0.22	0.23875	-0.5	-0.6	-0.48	-0.32	-0.86	-0.58	-0.28	-0.56	-0.5225	0.038188	0.73009	21.9717	14.183	-0.515005	0.219434	0.219434	12.472	9.041	18.65	18.216	17.994	15.481	16.134	18.973	15.8701	0.223508	0.684761	26.9855	12.9664	16.1617	3.08726	0.191024
Ahsa2:23390570.1	Ahsa2:23390570	Ahsa2	Distal	chr11	23388546	23390570	0.5	0.71	0.54	0.41	0.49	0.76	0.62	0.51	0.5675	-0.35	-0.63	-0.45	-0.29	-0.24	-0.67	-0.38	-0.15	-0.395	0.0017646	0.289956	23.8259	17.8296	-0.39661	0.212767	0.212767	50.855	36.929	50.715	61.038	46.579	44.798	49.742	46.38	48.3795	0.275305	0.780738	24.3319	23.0967	48.359	3.23357	0.0668659
Ahsa2:23390570.4	Ahsa2:23390570	Ahsa2	Proximal	chr11	23390228	23390570	0.15	0.08	0.09	0.12	0.25	0.09	0.24	0.36	0.1725	-0.35	-0.63	-0.45	-0.29	-0.24	-0.67	-0.38	-0.15	-0.395	0.0017646	0.289956	23.8259	17.8296	-0.39661	0.212767	0.212767	50.855	36.929	50.715	61.038	46.579	44.798	49.742	46.38	48.3795	0.275305	0.780738	24.3319	23.0967	48.359	3.23357	0.0668659
AI597468:84577153.1	AI597468:84577153	AI597468	Distal	chr10	84577153	84585471	0.19	0.45	0.24	0.22	0.26	0.34	0.25	0.31	0.2825	0.1	-0.27	-0.02	0.07	-0.09	-0.1	0.02	-0.11	-0.05	0.026175	0.613473	19.4099	0.797684	-0.0594802	0.137169	0.137169	3.691	3.55	3.802	3.882	3.711	3.703	3.33	2.433	3.51275	0.959764	1	26.5391	11.5285	3.50864	0.096734	0.0275703
AI597468:84577153.5	AI597468:84577153	AI597468	Proximal	chr10	84577153	84580331	0.29	0.18	0.22	0.29	0.17	0.24	0.27	0.2	0.2325	0.1	-0.27	-0.02	0.07	-0.09	-0.1	0.02	-0.11	-0.05	0.026175	0.613473	19.4099	0.797684	-0.0594802	0.137169	0.137169	3.691	3.55	3.802	3.882	3.711	3.703	3.33	2.433	3.51275	0.959764	1	26.5391	11.5285	3.50864	0.096734	0.0275703
Aim1:43671763.1	Aim1:43671763	Aim1	Distal	chr10	43670442	43671763	0.21	0.35	0.52	0.21	0.15	0.14	0.39	0.26	0.27875	0.48	0.23	-0.16	0.48	0.59	0.57	0.09	0.37	0.33125	0.020426	0.568093	27.3409	19.9145	0.355863	0.322751	0.322751	3.392	4.84	4.14	4.36	3.671	5.004	4.238	3.282	4.11587	0.151426	0.527813	23.0278	7.4222	4.14378	0.64749	0.156256
Aim1:43671763.2	Aim1:43671763	Aim1	Proximal	chr10	43670474	43671763	0.69	0.58	0.36	0.69	0.74	0.71	0.48	0.63	0.61	0.48	0.23	-0.16	0.48	0.59	0.57	0.09	0.37	0.33125	0.020426	0.568093	27.3409	19.9145	0.355863	0.322751	0.322751	3.392	4.84	4.14	4.36	3.671	5.004	4.238	3.282	4.11587	0.151426	0.527813	23.0278	7.4222	4.14378	0.64749	0.156256
Akr1c14:4088194.3	Akr1c14:4088194	Akr1c14	Distal	chr13	4088194	4089882	0.28	0.32	0.29	0.22	0.23	0.19	0.26	0.22	0.25125	0.16	0.02	0.11	0.3	0.25	0.17	0.17	0.23	0.17625	0.0300885	0.646349	28.2024	14.6892	0.193157	0.104111	0.104111	108.13	105.401	165.045	175.326	113.489	115.605	162.411	131.865	134.659	0.0551354	0.272508	22.5729	15.9291	133.976	33.3982	0.249285
Akr1c14:4088194.4	Akr1c14:4088194	Akr1c14	Proximal	chr13	4088194	4089808	0.44	0.34	0.4	0.52	0.48	0.36	0.43	0.45	0.4275	0.16	0.02	0.11	0.3	0.25	0.17	0.17	0.23	0.17625	0.0300885	0.646349	28.2024	14.6892	0.193157	0.104111	0.104111	108.13	105.401	165.045	175.326	113.489	115.605	162.411	131.865	134.659	0.0551354	0.272508	22.5729	15.9291	133.976	33.3982	0.249285
Amacr:10924595.4	Amacr:10924595	Amacr	Distal	chr15	10924595	10925333	0.16	0.19	0.22	0.1	0.08	0.19	0.21	0.13	0.16	0.61	0.55	0.48	0.77	0.82	0.6	0.53	0.67	0.62875	0.00850777	0.460481	27.9765	17.211	0.649062	0.147606	0.147606	63.798	80.368	73.683	58.171	62.605	74.549	62.016	44.433	64.9529	0.000851426	0.0311406	23.2399	6.73908	65.3418	11.8994	0.18211
Amacr:10924595.5	Amacr:10924595	Amacr	Proximal	chr15	10924595	10925296	0.77	0.74	0.7	0.87	0.9	0.79	0.74	0.8	0.78875	0.61	0.55	0.48	0.77	0.82	0.6	0.53	0.67	0.62875	0.00850777	0.460481	27.9765	17.211	0.649062	0.147606	0.147606	63.798	80.368	73.683	58.171	62.605	74.549	62.016	44.433	64.9529	0.000851426	0.0311406	23.2399	6.73908	65.3418	11.8994	0.18211
Ankrd39:36596379.1	Ankrd39:36596379	Ankrd39	Distal	chr1	36595016	36596379	0.68	0.54	0.44	0.73	0.71	0.55	0.22	0.51	0.5475	-0.49	-0.3	-0.11	-0.6	-0.55	-0.34	0.28	-0.26	-0.29625	0.015953	0.530173	27.8608	2.92844	-0.341971	0.323473	0.323473	3.326	2.948	2.18	2.617	3.374	2.32	2.095	2.313	2.64662	0.00368668	0.0577576	23.7946	23.0045	2.64386	0.541069	0.204651
Ankrd39:36596379.2	Ankrd39:36596379	Ankrd39	Proximal	chr1	36595873	36596379	0.19	0.24	0.33	0.13	0.16	0.21	0.5	0.25	0.25125	-0.49	-0.3	-0.11	-0.6	-0.55	-0.34	0.28	-0.26	-0.29625	0.015953	0.530173	27.8608	2.92844	-0.341971	0.323473	0.323473	3.326	2.948	2.18	2.617	3.374	2.32	2.095	2.313	2.64662	0.00368668	0.0577576	23.7946	23.0045	2.64386	0.541069	0.204651
Ankrd52:127827527.1	Ankrd52:127827527	Ankrd52	Distal	chr10	127827527	127833026	0.67	0.91	0.7	0.56	0.49	0.6	0.69	0.54	0.645	-0.49	-0.86	-0.6	-0.2	-0.14	-0.29	-0.51	-0.23	-0.415	0.00768674	0.449271	28.3704	16.9142	-0.375494	0.27047	0.27047	14.7	15.212	18.69	14.488	13.544	18.495	17.599	17.217	16.2431	0.136964	0.492183	22.5631	10.937	16.3525	1.89469	0.115865
Ankrd52:127827527.2	Ankrd52:127827527	Ankrd52	Proximal	chr10	127827527	127832619	0.18	0.05	0.1	0.36	0.35	0.31	0.18	0.31	0.23	-0.49	-0.86	-0.6	-0.2	-0.14	-0.29	-0.51	-0.23	-0.415	0.00768674	0.449271	28.3704	16.9142	-0.375494	0.27047	0.27047	14.7	15.212	18.69	14.488	13.544	18.495	17.599	17.217	16.2431	0.136964	0.492183	22.5631	10.937	16.3525	1.89469	0.115865
Aox1:58135358.1	Aox1:58135358	Aox1	Distal	chr1	58135358	58136484	0.66	0.81	0.83	0.65	0.68	0.89	0.76	0.67	0.74375	-0.32	-0.62	-0.66	-0.3	-0.36	-0.78	-0.52	-0.34	-0.4875	0.000235024	0.120195	22.4238	19.5269	-0.503275	0.229839	0.229839	14.249	16.941	18.702	14.628	16.127	14.732	15.781	16.107	15.9084	0.814115	1	27.3333	5.04497	15.77	1.32828	0.0842283
Aox1:58135358.2	Aox1:58135358	Aox1	Proximal	chr1	58135358	58135852	0.34	0.19	0.17	0.35	0.32	0.11	0.24	0.33	0.25625	-0.32	-0.62	-0.66	-0.3	-0.36	-0.78	-0.52	-0.34	-0.4875	0.000235024	0.120195	22.4238	19.5269	-0.503275	0.229839	0.229839	14.249	16.941	18.702	14.628	16.127	14.732	15.781	16.107	15.9084	0.814115	1	27.3333	5.04497	15.77	1.32828	0.0842283
Ap4m1:138619505.2	Ap4m1:138619505	Ap4m1	Distal	chr5	138619505	138621657	0.34	0.48	0.44	0.37	0.27	0.38	0.44	0.41	0.39125	0.06	-0.14	-0.19	-0.03	0.14	0.05	-0.26	-0.05	-0.0525	0.00646644	0.413381	27.0843	20.0197	-0.0397244	0.172218	0.172218	10.468	12.166	9.968	8.406	10.361	10.963	8.625	8.398	9.91937	0.000553515	0.0264417	22.6522	5.80391	9.97669	1.47938	0.148284
Ap4m1:138619505.3	Ap4m1:138619505	Ap4m1	Proximal	chr5	138619505	138620704	0.4	0.34	0.25	0.34	0.41	0.43	0.18	0.36	0.33875	0.06	-0.14	-0.19	-0.03	0.14	0.05	-0.26	-0.05	-0.0525	0.00646644	0.413381	27.0843	20.0197	-0.0397244	0.172218	0.172218	10.468	12.166	9.968	8.406	10.361	10.963	8.625	8.398	9.91937	0.000553515	0.0264417	22.6522	5.80391	9.97669	1.47938	0.148284
Arf6:70473311.2	Arf6:70473311	Arf6	Distal	chr12	70473311	70476967	0.48	0.34	0.39	0.32	0.35	0.17	0.36	0.38	0.34875	-0.16	0.18	0.1	-0.18	-0.07	0.27	0.14	0.09	0.04625	0.0140428	0.524725	24.3151	6.42	0.0435997	0.182544	0.182544	101.653	88.844	105.31	101.329	99.809	104.774	107.021	94.146	100.361	0.726555	1	20.6667	10.551	100.452	0.753711	0.00750318
Arf6:70473311.3	Arf6:70473311	Arf6	Proximal	chr12	70473311	70476824	0.32	0.52	0.49	0.14	0.28	0.44	0.5	0.47	0.395	-0.16	0.18	0.1	-0.18	-0.07	0.27	0.14	0.09	0.04625	0.0140428	0.524725	24.3151	6.42	0.0435997	0.182544	0.182544	101.653	88.844	105.31	101.329	99.809	104.774	107.021	94.146	100.361	0.726555	1	20.6667	10.551	100.452	0.753711	0.00750318
Arfgap2:91115922.5	Arfgap2:91115922	Arfgap2	Distal	chr2	91115922	91117093	0.94	0.84	0.84	0.87	0.93	0.9	0.7	0.82	0.855	-0.9	-0.7	-0.69	-0.77	-0.88	-0.83	-0.42	-0.67	-0.7325	0.0490884	0.798951	27.5511	5.53422	-0.74647	0.153179	0.153179	55.056	55.938	56.334	54.263	57.28	54.867	44.975	47.58	53.2866	0.846375	1	22.8339	3.16315	53.2911	2.46182	0.0461958
Arfgap2:91115922.6	Arfgap2:91115922	Arfgap2	Proximal	chr2	91115922	91116116	0.04	0.14	0.15	0.1	0.05	0.07	0.28	0.15	0.1225	-0.9	-0.7	-0.69	-0.77	-0.88	-0.83	-0.42	-0.67	-0.7325	0.0490884	0.798951	27.5511	5.53422	-0.74647	0.153179	0.153179	55.056	55.938	56.334	54.263	57.28	54.867	44.975	47.58	53.2866	0.846375	1	22.8339	3.16315	53.2911	2.46182	0.0461958
Arhgdib:136872847.2	Arhgdib:136872847	Arhgdib	Distal	chr6	136872176	136872847	0.16	0.27	0.46	0.42	0.29	0.43	0.46	0.4	0.36125	0.58	0.43	0.01	0.1	0.36	0.05	0.01	0.17	0.21375	0.0119916	0.500631	22.4747	0.950565	0.203684	0.210176	0.210176	2.214	2.955	2.164	2.145	2.455	2.773	2.461	3.034	2.52512	0.767916	1	20.3436	2.78918	2.51915	0.0427297	0.0169619
Arhgdib:136872847.3	Arhgdib:136872847	Arhgdib	Proximal	chr6	136872226	136872847	0.74	0.7	0.47	0.52	0.65	0.48	0.47	0.57	0.575	0.58	0.43	0.01	0.1	0.36	0.05	0.01	0.17	0.21375	0.0119916	0.500631	22.4747	0.950565	0.203684	0.210176	0.210176	2.214	2.955	2.164	2.145	2.455	2.773	2.461	3.034	2.52512	0.767916	1	20.3436	2.78918	2.51915	0.0427297	0.0169619
Aspa:73119135.4	Aspa:73119135	Aspa	Distal	chr11	73118494	73119135	0.24	0.33	0.3	0.12	0.27	0.32	0.08	0.09	0.21875	0.34	0.19	0.3	0.58	0.34	0.13	0.66	0.62	0.395	0.015494	0.530173	22.162	18.9387	0.381744	0.186505	0.186505	6.808	5.642	8.289	8.558	8.026	5.984	7.515	7.17	7.249	0.179129	0.591425	28.4893	11.6503	7.41184	1.18553	0.15995
Aspa:73119135.5	Aspa:73119135	Aspa	Proximal	chr11	73118741	73119135	0.58	0.52	0.6	0.7	0.61	0.45	0.74	0.71	0.61375	0.34	0.19	0.3	0.58	0.34	0.13	0.66	0.62	0.395	0.015494	0.530173	22.162	18.9387	0.381744	0.186505	0.186505	6.808	5.642	8.289	8.558	8.026	5.984	7.515	7.17	7.249	0.179129	0.591425	28.4893	11.6503	7.41184	1.18553	0.15995
Aspscr1:120570658.1	Aspscr1:120570658	Aspscr1	Distal	chr11	120570658	120572971	0.54	0.66	0.66	0.61	0.58	0.6	0.73	0.69	0.63375	-0.08	-0.32	-0.32	-0.22	-0.16	-0.2	-0.46	-0.38	-0.2675	0.0175125	0.551151	28.0312	18.8133	-0.253858	0.132907	0.132907	14.437	15.63	13.506	15.814	14.024	14.186	10.934	12.211	13.8428	0.980696	1	23.8198	3.97104	13.8431	0.0574227	0.00414812
Aspscr1:120570658.2	Aspscr1:120570658	Aspscr1	Proximal	chr11	120570658	120570761	0.46	0.34	0.34	0.39	0.42	0.4	0.27	0.31	0.36625	-0.08	-0.32	-0.32	-0.22	-0.16	-0.2	-0.46	-0.38	-0.2675	0.0175125	0.551151	28.0312	18.8133	-0.253858	0.132907	0.132907	14.437	15.63	13.506	15.814	14.024	14.186	10.934	12.211	13.8428	0.980696	1	23.8198	3.97104	13.8431	0.0574227	0.00414812
Avpi1:42198338.1	Avpi1:42198338	Avpi1	Distal	chr19	42197763	42198338	0.22	0.1	0.12	0.17	0.2	0.12	0.09	0.24	0.1575	0.56	0.8	0.76	0.66	0.6	0.76	0.82	0.52	0.685	0.0170051	0.540726	23.6167	8.97757	0.687299	0.13892	0.13892	24.945	26.754	24.63	24.745	25.936	20.308	21.041	22.724	23.8854	0.940762	1	20.7919	16.1994	23.8488	1.15299	0.0483458
Avpi1:42198338.2	Avpi1:42198338	Avpi1	Proximal	chr19	42197893	42198338	0.78	0.9	0.88	0.83	0.8	0.88	0.91	0.76	0.8425	0.56	0.8	0.76	0.66	0.6	0.76	0.82	0.52	0.685	0.0170051	0.540726	23.6167	8.97757	0.687299	0.13892	0.13892	24.945	26.754	24.63	24.745	25.936	20.308	21.041	22.724	23.8854	0.940762	1	20.7919	16.1994	23.8488	1.15299	0.0483458
AW146020:81907948.1	AW146020:81907948	AW146020	Distal	chr6	81907948	81909436	0.34	0.29	0.34	0.6	0.54	0.25	0.42	0.64	0.4275	-0.13	-0.21	-0.18	-0.53	-0.46	-0.06	-0.26	-0.51	-0.2925	0.0355873	0.710887	26.7677	0.970042	-0.314044	0.20397	0.20397	1.96	2.161	2.037	1.94	1.784	1.964	2.221	1.885	1.994	0.0103846	0.0992131	27.8566	2.64104	1.9678	0.181022	0.0919921
AW146020:81907948.2	AW146020:81907948	AW146020	Proximal	chr6	81907948	81909252	0.21	0.08	0.16	0.07	0.08	0.19	0.16	0.13	0.135	-0.13	-0.21	-0.18	-0.53	-0.46	-0.06	-0.26	-0.51	-0.2925	0.0355873	0.710887	26.7677	0.970042	-0.314044	0.20397	0.20397	1.96	2.161	2.037	1.94	1.784	1.964	2.221	1.885	1.994	0.0103846	0.0992131	27.8566	2.64104	1.9678	0.181022	0.0919921
B230118H07Rik:101402511.2	B230118H07Rik:101402511	B230118H07Rik	Distal	chr2	101402251	101402511	0.33	0.44	0.48	0.28	0.32	0.33	0	0.39	0.32125	0.33	0.1	0.02	0.43	0.31	0.31	0	0.19	0.21125	0.024784	0.613473	27.9362	17.5863	0.236458	0.192975	0.192975	1.177	1.39	1.147	1.201	1.272	1.214	1.482	1.098	1.24763	0.880478	1	24.7677	6.14781	1.24447	0.0900815	0.0723851
B230118H07Rik:101402511.3	B230118H07Rik:101402511	B230118H07Rik	Proximal	chr2	101402280	101402511	0.66	0.54	0.5	0.71	0.63	0.64	0	0.58	0.5325	0.33	0.1	0.02	0.43	0.31	0.31	0	0.19	0.21125	0.024784	0.613473	27.9362	17.5863	0.236458	0.192975	0.192975	1.177	1.39	1.147	1.201	1.272	1.214	1.482	1.098	1.24763	0.880478	1	24.7677	6.14781	1.24447	0.0900815	0.0723851
B230208H17Rik:25439508.1	B230208H17Rik:25439508	B230208H17Rik	Distal	chr2	25438538	25439508	0.74	0.71	0.53	0.69	0.84	0.46	0.53	0.73	0.65375	-0.61	-0.55	-0.31	-0.5	-0.76	-0.18	-0.25	-0.62	-0.4725	0.021935	0.578201	21.739	12.5569	-0.453269	0.238065	0.238065	8.275	5.853	11.529	9.865	9.222	9.18	11.201	9.686	9.35138	0.154055	0.533962	22.2002	16.1462	9.31936	1.57052	0.168522
B230208H17Rik:25439508.2	B230208H17Rik:25439508	B230208H17Rik	Proximal	chr2	25438999	25439508	0.13	0.16	0.22	0.19	0.08	0.28	0.28	0.11	0.18125	-0.61	-0.55	-0.31	-0.5	-0.76	-0.18	-0.25	-0.62	-0.4725	0.021935	0.578201	21.739	12.5569	-0.453269	0.238065	0.238065	8.275	5.853	11.529	9.865	9.222	9.18	11.201	9.686	9.35138	0.154055	0.533962	22.2002	16.1462	9.31936	1.57052	0.168522
Bag5:112949623.3	Bag5:112949623	Bag5	Distal	chr12	112947699	112949623	0.6	0.44	0.3	0.51	0.63	0.33	0.42	0.39	0.4525	-0.49	-0.15	0	-0.32	-0.51	-0.08	-0.2	-0.23	-0.2475	0.0260393	0.613473	23.9133	9.13763	-0.246757	0.214009	0.214009	30.287	27.659	32.322	27.292	30.241	31.337	32.166	24.336	29.455	0.685763	1	22.0593	10.8727	29.6391	2.19709	0.0741282
Bag5:112949623.5	Bag5:112949623	Bag5	Proximal	chr12	112948113	112949623	0.11	0.29	0.3	0.19	0.12	0.25	0.22	0.16	0.205	-0.49	-0.15	0	-0.32	-0.51	-0.08	-0.2	-0.23	-0.2475	0.0260393	0.613473	23.9133	9.13763	-0.246757	0.214009	0.214009	30.287	27.659	32.322	27.292	30.241	31.337	32.166	24.336	29.455	0.685763	1	22.0593	10.8727	29.6391	2.19709	0.0741282
Birc2:7818943.2	Birc2:7818943	Birc2	Distal	chr9	7818309	7818943	0.42	0.54	0.54	0.39	0.32	0.31	0.36	0.3	0.3975	-0.27	-0.41	-0.4	-0.05	0.04	-0.01	-0.22	-0.01	-0.16625	0.0489989	0.798951	28.3243	17.4647	-0.140884	0.187846	0.187846	11.431	10.811	12.444	11.291	10.423	11.337	12.257	9.991	11.2481	0.0247886	0.163028	21.6457	13.1719	11.3238	1.01734	0.0898412
Birc2:7818943.3	Birc2:7818943	Birc2	Proximal	chr9	7818563	7818943	0.15	0.13	0.14	0.34	0.36	0.3	0.14	0.29	0.23125	-0.27	-0.41	-0.4	-0.05	0.04	-0.01	-0.22	-0.01	-0.16625	0.0489989	0.798951	28.3243	17.4647	-0.140884	0.187846	0.187846	11.431	10.811	12.444	11.291	10.423	11.337	12.257	9.991	11.2481	0.0247886	0.163028	21.6457	13.1719	11.3238	1.01734	0.0898412
Bri3bp:125934696.2	Bri3bp:125934696	Bri3bp	Distal	chr5	125934696	125940734	0.29	0.33	0.29	0.26	0.31	0.32	0.2	0.18	0.2725	0.31	0.21	0.38	0.37	0.27	0.26	0.51	0.58	0.36125	0.0484098	0.798951	23.8198	15.407	0.360762	0.107426	0.107426	10.647	10.646	10.275	8.769	10.124	9.924	8.876	9.495	9.8445	0.3642	0.934526	22.522	5.64273	9.86369	0.524303	0.0531548
Bri3bp:125934696.3	Bri3bp:125934696	Bri3bp	Proximal	chr5	125934696	125935465	0.6	0.54	0.67	0.63	0.58	0.58	0.71	0.76	0.63375	0.31	0.21	0.38	0.37	0.27	0.26	0.51	0.58	0.36125	0.0484098	0.798951	23.8198	15.407	0.360762	0.107426	0.107426	10.647	10.646	10.275	8.769	10.124	9.924	8.876	9.495	9.8445	0.3642	0.934526	22.522	5.64273	9.86369	0.524303	0.0531548
Brwd1:96224040.5	Brwd1:96224040	Brwd1	Distal	chr16	96223149	96224040	0.15	0.1	0.24	0.2	0.18	0.17	0.25	0.25	0.1925	0.24	0.39	0.19	0.13	0.3	0.24	0.14	0.16	0.22375	0.00286911	0.308846	22.2487	5.06034	0.226051	0.104734	0.104734	3.267	3.412	3.981	2.383	2.522	3.071	2.953	1.924	2.93912	0.0856198	0.360562	23.4374	7.36826	2.95388	0.570573	0.19316
Brwd1:96224040.6	Brwd1:96224040	Brwd1	Proximal	chr16	96223709	96224040	0.39	0.49	0.43	0.33	0.48	0.41	0.39	0.41	0.41625	0.24	0.39	0.19	0.13	0.3	0.24	0.14	0.16	0.22375	0.00286911	0.308846	22.2487	5.06034	0.226051	0.104734	0.104734	3.267	3.412	3.981	2.383	2.522	3.071	2.953	1.924	2.93912	0.0856198	0.360562	23.4374	7.36826	2.95388	0.570573	0.19316
Cbfa2t2:154360620.2	Cbfa2t2:154360620	Cbfa2t2	Distal	chr2	154360620	154365028	0.29	0.45	0.17	0.38	0.4	0.33	0.18	0.24	0.305	-0.18	-0.25	0.01	-0.17	-0.28	-0.03	0.12	-0.02	-0.1	0.033525	0.687266	22.807	12.607	-0.0963171	0.135341	0.135341	#N/A	#N/A	#N/A	#N/A	#N/A	#N/A	#N/A	#N/A	#N/A	#N/A	#N/A	#N/A	#N/A	#N/A	#N/A	#N/A
Cbfa2t2:154360620.3	Cbfa2t2:154360620	Cbfa2t2	Proximal	chr2	154360620	154364766	0.11	0.2	0.18	0.21	0.12	0.3	0.3	0.22	0.205	-0.18	-0.25	0.01	-0.17	-0.28	-0.03	0.12	-0.02	-0.1	0.033525	0.687266	22.807	12.607	-0.0963171	0.135341	0.135341	#N/A	#N/A	#N/A	#N/A	#N/A	#N/A	#N/A	#N/A	#N/A	#N/A	#N/A	#N/A	#N/A	#N/A	#N/A	#N/A
Cbx4:118943615.2	Cbx4:118943615	Cbx4	Distal	chr11	118941469	118943615	0.35	0.72	0.61	0.17	0.22	0.25	0.56	0.25	0.39125	0.21	-0.55	-0.31	0.53	0.49	0.33	-0.25	0.21	0.0825	0.0202958	0.568093	27.9688	17.4732	0.15051	0.511443	0.511443	18.524	15.201	20.102	17.666	20.571	15.445	24.336	14.903	18.3435	0.854286	1	21.3423	18.3028	18.2473	1.53273	0.0839977
Cbx4:118943615.3	Cbx4:118943615	Cbx4	Proximal	chr11	118941556	118943615	0.56	0.17	0.3	0.7	0.71	0.58	0.31	0.46	0.47375	0.21	-0.55	-0.31	0.53	0.49	0.33	-0.25	0.21	0.0825	0.0202958	0.568093	27.9688	17.4732	0.15051	0.511443	0.511443	18.524	15.201	20.102	17.666	20.571	15.445	24.336	14.903	18.3435	0.854286	1	21.3423	18.3028	18.2473	1.53273	0.0839977
Cdc25a:109794583.2	Cdc25a:109794583	Cdc25a	Distal	chr9	109794583	109796399	0.51	0.45	0.25	0.3	0.44	0.27	0.25	0.2	0.33375	-0.31	-0.22	0.3	0.1	-0.1	0.14	0.2	0.04	0.01875	0.0098684	0.473127	22.4262	12.5219	0.0287717	0.221183	0.221183	1.622	1.346	2.014	1.816	1.592	1.573	1.624	1.76	1.66837	0.0926923	0.381112	24.1733	14.8055	1.6692	0.204357	0.122428
Cdc25a:109794583.3	Cdc25a:109794583	Cdc25a	Proximal	chr9	109794583	109796326	0.2	0.23	0.55	0.4	0.34	0.41	0.45	0.24	0.3525	-0.31	-0.22	0.3	0.1	-0.1	0.14	0.2	0.04	0.01875	0.0098684	0.473127	22.4262	12.5219	0.0287717	0.221183	0.221183	1.622	1.346	2.014	1.816	1.592	1.573	1.624	1.76	1.66837	0.0926923	0.381112	24.1733	14.8055	1.6692	0.204357	0.122428
Cdk12:98111024.4	Cdk12:98111024	Cdk12	Distal	chr11	98111024	98114852	0.29	0.48	0.2	0.12	0.06	0.3	0.18	0.1	0.21625	-0.17	-0.41	-0.06	0.11	0.29	-0.17	-0.04	0.18	-0.03375	0.0482448	0.798951	28.159	14.1916	0.00601364	0.24922	0.24922	3.529	3.275	3.198	2.919	3.286	4.09	3.78	3.041	3.38975	0.0628157	0.295168	27.3333	26.2146	3.34062	0.478391	0.143204
Cdk12:98111024.5	Cdk12:98111024	Cdk12	Proximal	chr11	98111024	98114245	0.12	0.07	0.14	0.23	0.35	0.13	0.14	0.28	0.1825	-0.17	-0.41	-0.06	0.11	0.29	-0.17	-0.04	0.18	-0.03375	0.0482448	0.798951	28.159	14.1916	0.00601364	0.24922	0.24922	3.529	3.275	3.198	2.919	3.286	4.09	3.78	3.041	3.38975	0.0628157	0.295168	27.3333	26.2146	3.34062	0.478391	0.143204
Celsr1:85731135.1	Celsr1:85731135	Celsr1	Distal	chr15	85729125	85731135	0.08	0.25	0.32	0.07	0.05	0.25	0.28	0.05	0.16875	0.84	0.5	0.36	0.86	0.9	0.5	0.44	0.9	0.6625	7.11398e-05	0.0545731	23.8259	21.0566	0.660397	0.296467	0.296467	1.703	0.909	0.711	2.487	1.932	0.422	0.664	2.203	1.37888	0.00368037	0.0577015	24.0819	18.0116	1.38264	1.02152	0.738819
Celsr1:85731135.2	Celsr1:85731135	Celsr1	Proximal	chr15	85729359	85731135	0.92	0.75	0.68	0.93	0.95	0.75	0.72	0.95	0.83125	0.84	0.5	0.36	0.86	0.9	0.5	0.44	0.9	0.6625	7.11398e-05	0.0545731	23.8259	21.0566	0.660397	0.296467	0.296467	1.703	0.909	0.711	2.487	1.932	0.422	0.664	2.203	1.37888	0.00368037	0.0577015	24.0819	18.0116	1.38264	1.02152	0.738819
Chpf2:24096887.5	Chpf2:24096887	Chpf2	Distal	chr5	24096887	24100214	0.33	0.14	0.31	0.42	0.35	0.26	0.1	0.19	0.2625	0.04	0.57	0.24	-0.04	0.11	0.28	0.6	0.36	0.27	0.0158934	0.530173	28.4126	2.22843	0.228607	0.268319	0.268319	20.145	25.07	23.077	20.465	22.27	23.684	19.489	17.012	21.4015	0.0178887	0.135632	22.2982	6.93909	21.5595	2.76689	0.128337
Chpf2:24096887.6	Chpf2:24096887	Chpf2	Proximal	chr5	24096887	24098305	0.37	0.71	0.55	0.38	0.46	0.54	0.7	0.55	0.5325	0.04	0.57	0.24	-0.04	0.11	0.28	0.6	0.36	0.27	0.0158934	0.530173	28.4126	2.22843	0.228607	0.268319	0.268319	20.145	25.07	23.077	20.465	22.27	23.684	19.489	17.012	21.4015	0.0178887	0.135632	22.2982	6.93909	21.5595	2.76689	0.128337
Ciao1:127068773.1	Ciao1:127068773	Ciao1	Distal	chr2	127065497	127068773	0.24	0.24	0.23	0.25	0.25	0.29	0.22	0.29	0.25125	0.17	0.41	0.42	0.15	0.15	0.27	0.31	0.19	0.25875	0.00696876	0.436401	26.8921	4.37249	0.242546	0.145105	0.145105	36.249	40.591	41.207	38.352	39.719	42.468	43.572	36.398	39.8195	0.0185346	0.138557	23.2217	8.8121	39.9248	2.96862	0.0743553
Ciao1:127068773.6	Ciao1:127068773	Ciao1	Proximal	chr2	127068277	127068773	0.41	0.65	0.65	0.4	0.4	0.56	0.53	0.48	0.51	0.17	0.41	0.42	0.15	0.15	0.27	0.31	0.19	0.25875	0.00696876	0.436401	26.8921	4.37249	0.242546	0.145105	0.145105	36.249	40.591	41.207	38.352	39.719	42.468	43.572	36.398	39.8195	0.0185346	0.138557	23.2217	8.8121	39.9248	2.96862	0.0743553
Ciz1:32233484.1	Ciz1:32233484	Ciz1	Distal	chr2	32233484	32236484	0.78	0.58	0.82	0.84	0.77	0.68	0.9	0.87	0.78	-0.56	-0.16	-0.64	-0.68	-0.54	-0.36	-0.8	-0.74	-0.56	0.00874895	0.460481	22.4223	5.56745	-0.551659	0.239658	0.239658	13.183	12.225	11.927	13.008	13.758	15.1	14.28	16.778	13.7824	0.856691	1	25.6543	19.9015	13.8231	0.683745	0.0494639
Ciz1:32233484.2	Ciz1:32233484	Ciz1	Proximal	chr2	32233484	32233819	0.22	0.42	0.18	0.16	0.23	0.32	0.1	0.13	0.22	-0.56	-0.16	-0.64	-0.68	-0.54	-0.36	-0.8	-0.74	-0.56	0.00874895	0.460481	22.4223	5.56745	-0.551659	0.239658	0.239658	13.183	12.225	11.927	13.008	13.758	15.1	14.28	16.778	13.7824	0.856691	1	25.6543	19.9015	13.8231	0.683745	0.0494639
Clcc1:108479897.1	Clcc1:108479897	Clcc1	Distal	chr3	108479897	108480930	0.68	0.83	0.48	0.73	0.82	0.54	0.62	0.77	0.68375	-0.36	-0.66	0.04	-0.46	-0.64	-0.08	-0.24	-0.54	-0.3675	0.0104848	0.473127	19.3872	15.4697	-0.325209	0.319866	0.319866	14.739	15.66	15.807	13.56	13.569	15.323	15.451	11.259	14.421	0.0317502	0.191023	23.8485	6.67325	14.4322	1.61136	0.111651
Clcc1:108479897.2	Clcc1:108479897	Clcc1	Proximal	chr3	108479897	108480818	0.32	0.17	0.52	0.27	0.18	0.46	0.38	0.23	0.31625	-0.36	-0.66	0.04	-0.46	-0.64	-0.08	-0.24	-0.54	-0.3675	0.0104848	0.473127	19.3872	15.4697	-0.325209	0.319866	0.319866	14.739	15.66	15.807	13.56	13.569	15.323	15.451	11.259	14.421	0.0317502	0.191023	23.8485	6.67325	14.4322	1.61136	0.111651
Clic3:25314085.1	Clic3:25314085	Clic3	Distal	chr2	25314085	25316516	0.72	0.91	0.76	0.58	0.6	0.78	0.72	0.47	0.6925	-0.49	-0.87	-0.64	-0.19	-0.22	-0.68	-0.52	0.03	-0.4475	2.25058e-05	0.037568	24.3872	17.7613	-0.441538	0.342568	0.342568	95.64	21.243	3.973	101.809	181.508	14.928	10.481	35.302	58.1105	0.00675062	0.0792649	26.2024	18.9679	64.5651	77.8254	1.20538
Clic3:25314085.2	Clic3:25314085	Clic3	Proximal	chr2	25314085	25314427	0.23	0.04	0.12	0.39	0.38	0.1	0.2	0.5	0.245	-0.49	-0.87	-0.64	-0.19	-0.22	-0.68	-0.52	0.03	-0.4475	2.25058e-05	0.037568	24.3872	17.7613	-0.441538	0.342568	0.342568	95.64	21.243	3.973	101.809	181.508	14.928	10.481	35.302	58.1105	0.00675062	0.0792649	26.2024	18.9679	64.5651	77.8254	1.20538
Cnot7:41579469.1	Cnot7:41579469	Cnot7	Distal	chr8	41577895	41579469	0.21	0.15	0.09	0.12	0.14	0.04	0.09	0.09	0.11625	0.41	0.59	0.73	0.52	0.4	0.6	0.6	0.49	0.5425	0.00198878	0.289956	22.5253	10.941	0.550752	0.138368	0.138368	14.316	15.333	16.187	10.307	12.161	15.097	16.163	7.862	13.4282	0.0824175	0.351794	24.447	6.29867	13.3614	3.25112	0.243322
Cnot7:41579469.2	Cnot7:41579469	Cnot7	Proximal	chr8	41577955	41579469	0.62	0.74	0.82	0.64	0.54	0.64	0.69	0.58	0.65875	0.41	0.59	0.73	0.52	0.4	0.6	0.6	0.49	0.5425	0.00198878	0.289956	22.5253	10.941	0.550752	0.138368	0.138368	14.316	15.333	16.187	10.307	12.161	15.097	16.163	7.862	13.4282	0.0824175	0.351794	24.447	6.29867	13.3614	3.25112	0.243322
Commd6:102033609.4	Commd6:102033609	Commd6	Distal	chr14	102033122	102033609	0.15	0.17	0.21	0.13	0.27	0.42	0.17	0.05	0.19625	0.48	0.32	0.26	0.52	0.28	-0.03	0.44	0.76	0.37875	0.0201102	0.566129	22.2262	19.1396	0.360837	0.249775	0.249775	21.762	21.878	18.98	19.771	21.144	18.889	15.52	14.67	19.0767	0.498164	1	24.0819	0.210175	19.0778	1.58617	0.0831424
Commd6:102033609.5	Commd6:102033609	Commd6	Proximal	chr14	102033289	102033609	0.63	0.49	0.47	0.65	0.55	0.39	0.61	0.81	0.575	0.48	0.32	0.26	0.52	0.28	-0.03	0.44	0.76	0.37875	0.0201102	0.566129	22.2262	19.1396	0.360837	0.249775	0.249775	21.762	21.878	18.98	19.771	21.144	18.889	15.52	14.67	19.0767	0.498164	1	24.0819	0.210175	19.0778	1.58617	0.0831424
Cpsf1:76426337.1	Cpsf1:76426337	Cpsf1	Distal	chr15	76424988	76426337	0.45	0.58	0.6	0.42	0.45	0.46	0.64	0.53	0.51625	0.1	-0.16	-0.2	0.16	0.1	0.08	-0.28	-0.06	-0.0325	0.0064017	0.413381	28.0092	17.5525	-0.00500585	0.208619	0.208619	28.946	27.417	25.829	25.777	29.611	25.039	18.941	26.837	26.0496	0.0824488	0.351804	22.9328	0.772026	25.9636	3.22126	0.124069
Cpsf1:76426337.2	Cpsf1:76426337	Cpsf1	Proximal	chr15	76426238	76426337	0.55	0.42	0.4	0.58	0.55	0.54	0.36	0.47	0.48375	0.1	-0.16	-0.2	0.16	0.1	0.08	-0.28	-0.06	-0.0325	0.0064017	0.413381	28.0092	17.5525	-0.00500585	0.208619	0.208619	28.946	27.417	25.829	25.777	29.611	25.039	18.941	26.837	26.0496	0.0824488	0.351804	22.9328	0.772026	25.9636	3.22126	0.124069
Cr1l:196930101.2	Cr1l:196930101	Cr1l	Distal	chr1	196922759	196930101	0.26	0.12	0.11	0.43	0.39	0.38	0.25	0.34	0.285	-0.04	0.13	0.14	-0.18	-0.19	-0.08	0.11	-0.15	-0.0325	0.0100653	0.473127	27.7587	2.66625	-0.0588774	0.184259	0.184259	7.645	7.977	7.087	6.756	6.936	7.433	6.97	4.879	6.96037	0.149217	0.523115	24.3622	3.40834	6.95156	0.747445	0.107522
Cr1l:196930101.4	Cr1l:196930101	Cr1l	Proximal	chr1	196929988	196930101	0.22	0.25	0.25	0.25	0.2	0.3	0.36	0.19	0.2525	-0.04	0.13	0.14	-0.18	-0.19	-0.08	0.11	-0.15	-0.0325	0.0100653	0.473127	27.7587	2.66625	-0.0588774	0.184259	0.184259	7.645	7.977	7.087	6.756	6.936	7.433	6.97	4.879	6.96037	0.149217	0.523115	24.3622	3.40834	6.95156	0.747445	0.107522
Csnk1g3:54112899.8	Csnk1g3:54112899	Csnk1g3	Distal	chr18	54112899	54113285	0.43	0.37	0.12	0.13	0.26	0.13	0.21	0.28	0.24125	-0.33	-0.28	0.18	0	-0.17	0.11	0.2	0.07	-0.0275	0.0168455	0.540611	22.3865	13.4505	-0.0213167	0.198142	0.198142	2.015	2.124	2.621	2.377	1.889	2.099	3.398	2.314	2.35462	0.00294779	0.0526072	22.6243	13.2133	2.36879	0.55371	0.233752
Csnk1g3:54112899.9	Csnk1g3:54112899	Csnk1g3	Proximal	chr18	54112899	54113180	0.1	0.09	0.3	0.13	0.09	0.24	0.41	0.35	0.21375	-0.33	-0.28	0.18	0	-0.17	0.11	0.2	0.07	-0.0275	0.0168455	0.540611	22.3865	13.4505	-0.0213167	0.198142	0.198142	2.015	2.124	2.621	2.377	1.889	2.099	3.398	2.314	2.35462	0.00294779	0.0526072	22.6243	13.2133	2.36879	0.55371	0.233752
Csrnp1:119882329.1	Csrnp1:119882329	Csrnp1	Distal	chr9	119880281	119882329	0.73	0.81	0.71	0.64	0.76	0.78	0.74	0.72	0.73625	-0.63	-0.76	-0.6	-0.44	-0.66	-0.69	-0.65	-0.62	-0.63125	0.038106	0.73009	25.5328	15.3389	-0.625145	0.103067	0.103067	3.102	3.988	6.261	6.302	4.189	4.367	6.008	3.317	4.69175	0.157183	0.541554	22.2296	13.6396	4.74671	1.59757	0.336563
Csrnp1:119882329.4	Csrnp1:119882329	Csrnp1	Proximal	chr9	119881330	119882329	0.1	0.05	0.11	0.2	0.1	0.09	0.09	0.1	0.105	-0.63	-0.76	-0.6	-0.44	-0.66	-0.69	-0.65	-0.62	-0.63125	0.038106	0.73009	25.5328	15.3389	-0.625145	0.103067	0.103067	3.102	3.988	6.261	6.302	4.189	4.367	6.008	3.317	4.69175	0.157183	0.541554	22.2296	13.6396	4.74671	1.59757	0.336563
Ctnnal1:56825260.1	Ctnnal1:56825260	Ctnnal1	Distal	chr4	56823807	56825260	0.83	0.79	0.79	0.87	0.87	0.75	0.64	0.78	0.79	-0.66	-0.58	-0.58	-0.74	-0.74	-0.5	-0.28	-0.56	-0.58	0.0497461	0.8034	28.2262	1.96765	-0.605092	0.160592	0.160592	#N/A	#N/A	#N/A	#N/A	#N/A	#N/A	#N/A	#N/A	#N/A	#N/A	#N/A	#N/A	#N/A	#N/A	#N/A	#N/A
Ctnnal1:56825260.2	Ctnnal1:56825260	Ctnnal1	Proximal	chr4	56824362	56825260	0.17	0.21	0.21	0.13	0.13	0.25	0.36	0.22	0.21	-0.66	-0.58	-0.58	-0.74	-0.74	-0.5	-0.28	-0.56	-0.58	0.0497461	0.8034	28.2262	1.96765	-0.605092	0.160592	0.160592	#N/A	#N/A	#N/A	#N/A	#N/A	#N/A	#N/A	#N/A	#N/A	#N/A	#N/A	#N/A	#N/A	#N/A	#N/A	#N/A
Cyhr1:76477004.2	Cyhr1:76477004	Cyhr1	Distal	chr15	76474208	76477004	0.22	0.16	0.17	0.27	0.28	0.16	0.15	0.2	0.20125	0.46	0.58	0.61	0.42	0.39	0.6	0.67	0.58	0.53875	0.00274377	0.308846	27.4787	3.46695	0.5218	0.12978	0.12978	34.263	47.688	45.906	32.499	34.982	40.495	26.242	26.825	36.1125	0.294118	0.81428	22.8538	7.62653	36.4358	6.41619	0.176096
Cyhr1:76477004.3	Cyhr1:76477004	Cyhr1	Proximal	chr15	76476197	76477004	0.68	0.74	0.78	0.69	0.67	0.76	0.82	0.78	0.74	0.46	0.58	0.61	0.42	0.39	0.6	0.67	0.58	0.53875	0.00274377	0.308846	27.4787	3.46695	0.5218	0.12978	0.12978	34.263	47.688	45.906	32.499	34.982	40.495	26.242	26.825	36.1125	0.294118	0.81428	22.8538	7.62653	36.4358	6.41619	0.176096
Cyp7a1:6195655.1	Cyp7a1:6195655	Cyp7a1	Distal	chr4	6191650	6195655	0.46	0.52	0.58	0.55	0.45	0.6	0.78	0.47	0.55125	-0.27	-0.48	-0.46	-0.27	-0.2	-0.33	-0.67	-0.19	-0.35875	0.0432002	0.768462	27.1007	18.2602	-0.338273	0.186677	0.186677	134.86	48.379	217.447	121.608	181.093	82.872	287.884	230.014	163.02	0.747838	1	23.4209	15.7864	162.29	51.7664	0.318976
Cyp7a1:6195655.3	Cyp7a1:6195655	Cyp7a1	Proximal	chr4	6193208	6195655	0.19	0.04	0.12	0.28	0.25	0.27	0.11	0.28	0.1925	-0.27	-0.48	-0.46	-0.27	-0.2	-0.33	-0.67	-0.19	-0.35875	0.0432002	0.768462	27.1007	18.2602	-0.338273	0.186677	0.186677	134.86	48.379	217.447	121.608	181.093	82.872	287.884	230.014	163.02	0.747838	1	23.4209	15.7864	162.29	51.7664	0.318976
D16Ertd472e:78545529.1	D16Ertd472e:78545529	D16Ertd472e	Distal	chr16	78540583	78545529	0.76	0.42	0.72	0.85	0.78	0.64	0.8	0.81	0.7225	-0.67	0.09	-0.53	-0.75	-0.65	-0.39	-0.65	-0.69	-0.53	0.0364012	0.711447	22.991	7.21743	-0.51906	0.250559	0.250559	2.926	2.03	2.917	2.225	2.364	2.065	3.451	2.211	2.52362	0.769992	1	24.1423	17.2669	2.52349	0.0227353	0.00900947
D16Ertd472e:78545529.4	D16Ertd472e:78545529	D16Ertd472e	Proximal	chr16	78545205	78545529	0.09	0.51	0.19	0.1	0.13	0.25	0.15	0.12	0.1925	-0.67	0.09	-0.53	-0.75	-0.65	-0.39	-0.65	-0.69	-0.53	0.0364012	0.711447	22.991	7.21743	-0.51906	0.250559	0.250559	2.926	2.03	2.917	2.225	2.364	2.065	3.451	2.211	2.52362	0.769992	1	24.1423	17.2669	2.52349	0.0227353	0.00900947
D17Wsu104e:56316426.1	D17Wsu104e:56316426	D17Wsu104e	Distal	chr17	56315691	56316426	0.21	0.27	0.24	0.2	0.21	0.23	0.37	0.26	0.24875	0.58	0.46	0.52	0.6	0.58	0.54	0.26	0.48	0.5025	0.0452895	0.793079	27.8551	17.0248	0.517922	0.110946	0.110946	45.333	44.189	42.088	49.207	44.902	38.103	34.087	36.826	41.8419	0.656936	1	25.3333	19.5755	42.0077	3.10851	0.0739987
D17Wsu104e:56316426.2	D17Wsu104e:56316426	D17Wsu104e	Proximal	chr17	56315970	56316426	0.79	0.73	0.76	0.8	0.79	0.77	0.63	0.74	0.75125	0.58	0.46	0.52	0.6	0.58	0.54	0.26	0.48	0.5025	0.0452895	0.793079	27.8551	17.0248	0.517922	0.110946	0.110946	45.333	44.189	42.088	49.207	44.902	38.103	34.087	36.826	41.8419	0.656936	1	25.3333	19.5755	42.0077	3.10851	0.0739987
D6Wsu163e:126925129.4	D6Wsu163e:126925129	D6Wsu163e	Distal	chr6	126925129	126925638	0.2	0.19	0.41	0.37	0.22	0.32	0.29	0.29	0.28625	0.1	0.08	-0.18	-0.08	0.14	-0.13	-0.06	0.05	-0.01	0.0151865	0.530173	21.5178	3.53025	-0.0176891	0.141088	0.141088	1.984	1.502	1.443	1.689	1.703	1.69	1.564	1.573	1.6435	0.12036	0.451878	26.7677	20.2726	1.65539	0.174679	0.105521
D6Wsu163e:126925129.5	D6Wsu163e:126925129	D6Wsu163e	Proximal	chr6	126925129	126925593	0.3	0.27	0.23	0.29	0.36	0.19	0.23	0.34	0.27625	0.1	0.08	-0.18	-0.08	0.14	-0.13	-0.06	0.05	-0.01	0.0151865	0.530173	21.5178	3.53025	-0.0176891	0.141088	0.141088	1.984	1.502	1.443	1.689	1.703	1.69	1.564	1.573	1.6435	0.12036	0.451878	26.7677	20.2726	1.65539	0.174679	0.105521
Dab2:6388782.1	Dab2:6388782	Dab2	Distal	chr15	6388782	6390712	0.35	0.45	0.32	0.28	0.41	0.39	0.24	0.25	0.33625	-0.16	-0.36	-0.13	0.04	-0.29	-0.22	0.16	0.14	-0.1025	0.0085918	0.460481	22.5474	17.0734	-0.109878	0.188961	0.188961	2.293	2.914	2.311	2.678	2.044	2.834	2.571	2.971	2.577	0.992343	1	27.3333	6.68999	2.56779	0.142882	0.055644
Dab2:6388782.5	Dab2:6388782	Dab2	Proximal	chr15	6388782	6389464	0.19	0.09	0.19	0.32	0.12	0.17	0.4	0.39	0.23375	-0.16	-0.36	-0.13	0.04	-0.29	-0.22	0.16	0.14	-0.1025	0.0085918	0.460481	22.5474	17.0734	-0.109878	0.188961	0.188961	2.293	2.914	2.311	2.678	2.044	2.834	2.571	2.971	2.577	0.992343	1	27.3333	6.68999	2.56779	0.142882	0.055644
Dclre1c:3370867.1	Dclre1c:3370867	Dclre1c	Distal	chr2	3370867	3372626	0.28	0.23	0.26	0.24	0.33	0.16	0.25	0.23	0.2475	0.13	0.27	0.19	0.04	0.11	0.41	0.17	0.14	0.1825	0.0256708	0.613473	23.371	6.89691	0.186002	0.125107	0.125107	2.312	2.913	4.089	1.596	2.511	3.046	3.366	2.328	2.77012	0.0585531	0.282636	23.5563	8.6528	2.78652	0.825166	0.296128
Dclre1c:3370867.2	Dclre1c:3370867	Dclre1c	Proximal	chr2	3370867	3372573	0.41	0.5	0.45	0.28	0.44	0.57	0.42	0.37	0.43	0.13	0.27	0.19	0.04	0.11	0.41	0.17	0.14	0.1825	0.0256708	0.613473	23.371	6.89691	0.186002	0.125107	0.125107	2.312	2.913	4.089	1.596	2.511	3.046	3.366	2.328	2.77012	0.0585531	0.282636	23.5563	8.6528	2.78652	0.825166	0.296128
Dda1:73998387.1	Dda1:73998387	Dda1	Distal	chr8	73998387	73999998	0.36	0.23	0.45	0.47	0.25	0.25	0.37	0.42	0.35	0.14	0.25	-0.17	-0.07	0.32	0.27	-0.12	-0.1	0.065	0.0185074	0.552834	25.7362	24.9932	0.059459	0.231739	0.231739	14.338	12.82	16.678	16.359	14.816	14.774	14.5	12.492	14.5971	0.733967	1	24.0049	1.53266	14.5972	0.923235	0.0632476
Dda1:73998387.2	Dda1:73998387	Dda1	Proximal	chr8	73998387	73999919	0.5	0.48	0.28	0.4	0.57	0.52	0.25	0.32	0.415	0.14	0.25	-0.17	-0.07	0.32	0.27	-0.12	-0.1	0.065	0.0185074	0.552834	25.7362	24.9932	0.059459	0.231739	0.231739	14.338	12.82	16.678	16.359	14.816	14.774	14.5	12.492	14.5971	0.733967	1	24.0049	1.53266	14.5972	0.923235	0.0632476
Ddx19a:113499990.6	Ddx19a:113499990	Ddx19a	Distal	chr8	113498995	113499990	0.2	0.16	0.15	0.33	0.25	0.3	0.16	0.27	0.2275	-0.08	0.07	0.01	-0.18	-0.09	0	0.21	-0.12	-0.0225	0.0188272	0.552834	27.5606	2.57102	-0.0433155	0.148222	0.148222	5.198	5.357	5.49	4.833	5.362	5.384	5.539	4.954	5.26463	0.290237	0.807111	24.0819	6.77886	5.26366	0.254099	0.0482741
Ddx19a:113499990.7	Ddx19a:113499990	Ddx19a	Proximal	chr8	113499422	113499990	0.12	0.23	0.16	0.15	0.16	0.3	0.37	0.15	0.205	-0.08	0.07	0.01	-0.18	-0.09	0	0.21	-0.12	-0.0225	0.0188272	0.552834	27.5606	2.57102	-0.0433155	0.148222	0.148222	5.198	5.357	5.49	4.833	5.362	5.384	5.539	4.954	5.26463	0.290237	0.807111	24.0819	6.77886	5.26366	0.254099	0.0482741
Dennd2d:106303454.4	Dennd2d:106303454	Dennd2d	Distal	chr3	106303454	106303972	0.41	0.42	0.31	0.23	0.44	0.38	0.32	0.35	0.3575	-0.28	-0.21	0.03	0.15	-0.3	-0.13	0.06	-0.02	-0.0875	0.00758615	0.447656	22.6333	13.9275	-0.0846642	0.210721	0.210721	5.149	6.592	5.291	4.801	5.555	5.783	5.366	5.413	5.49375	0.238293	0.714121	22.8538	6.12046	5.51622	0.563944	0.102234
Dennd2d:106303454.5	Dennd2d:106303454	Dennd2d	Proximal	chr3	106303454	106303906	0.13	0.21	0.34	0.38	0.14	0.25	0.38	0.33	0.27	-0.28	-0.21	0.03	0.15	-0.3	-0.13	0.06	-0.02	-0.0875	0.00758615	0.447656	22.6333	13.9275	-0.0846642	0.210721	0.210721	5.149	6.592	5.291	4.801	5.555	5.783	5.366	5.413	5.49375	0.238293	0.714121	22.8538	6.12046	5.51622	0.563944	0.102234
Dgkq:109077830.1	Dgkq:109077830	Dgkq	Distal	chr5	109074757	109077830	0.36	0.32	0.21	0.26	0.28	0.27	0.22	0.34	0.2825	-0.04	-0.09	0.1	0.09	-0.01	-0.01	0.28	0.04	0.045	0.0180455	0.552834	21.9453	16.6041	0.0421823	0.105256	0.105256	19.72	21.733	22.43	21.358	24.488	21.428	17.373	17.603	20.7666	0.895687	1	22.1173	4.73328	20.7825	1.5114	0.0727246
Dgkq:109077830.3	Dgkq:109077830	Dgkq	Proximal	chr5	109076067	109077830	0.32	0.23	0.31	0.35	0.27	0.26	0.5	0.38	0.3275	-0.04	-0.09	0.1	0.09	-0.01	-0.01	0.28	0.04	0.045	0.0180455	0.552834	21.9453	16.6041	0.0421823	0.105256	0.105256	19.72	21.733	22.43	21.358	24.488	21.428	17.373	17.603	20.7666	0.895687	1	22.1173	4.73328	20.7825	1.5114	0.0727246
Dolpp1:30254662.1	Dolpp1:30254662	Dolpp1	Distal	chr2	30254662	30264836	0.49	0.23	0.47	0.5	0.65	0.36	0.42	0.76	0.485	-0.28	0.24	-0.19	-0.32	-0.61	-0.08	-0.18	-0.74	-0.27	0.0242418	0.607232	24.6181	5.49373	-0.278952	0.319403	0.319403	11.266	12.487	13.16	12.824	12.162	13.195	11.377	13.542	12.5016	0.954429	1	24.6604	5.10414	12.5022	0.0179294	0.00143411
Dolpp1:30254662.2	Dolpp1:30254662	Dolpp1	Proximal	chr2	30254662	30256049	0.21	0.47	0.28	0.18	0.04	0.28	0.24	0.02	0.215	-0.28	0.24	-0.19	-0.32	-0.61	-0.08	-0.18	-0.74	-0.27	0.0242418	0.607232	24.6181	5.49373	-0.278952	0.319403	0.319403	11.266	12.487	13.16	12.824	12.162	13.195	11.377	13.542	12.5016	0.954429	1	24.6604	5.10414	12.5022	0.0179294	0.00143411
Drosha:12864747.2	Drosha:12864747	Drosha	Distal	chr15	12864747	12865046	0.27	0.29	0	0.28	0.27	0.32	0.35	0.26	0.255	0.3	0.29	0	0.33	0.34	0.21	0.14	0.38	0.24875	0.0141213	0.524725	21.95	2.00983	0.239356	0.152743	0.152743	#N/A	#N/A	#N/A	#N/A	#N/A	#N/A	#N/A	#N/A	#N/A	#N/A	#N/A	#N/A	#N/A	#N/A	#N/A	#N/A
Drosha:12864747.3	Drosha:12864747	Drosha	Proximal	chr15	12864747	12865001	0.57	0.58	0	0.61	0.61	0.53	0.49	0.64	0.50375	0.3	0.29	0	0.33	0.34	0.21	0.14	0.38	0.24875	0.0141213	0.524725	21.95	2.00983	0.239356	0.152743	0.152743	#N/A	#N/A	#N/A	#N/A	#N/A	#N/A	#N/A	#N/A	#N/A	#N/A	#N/A	#N/A	#N/A	#N/A	#N/A	#N/A
Dusp7:106275970.1	Dusp7:106275970	Dusp7	Distal	chr9	106275970	106278055	0.81	0.74	0.64	0.81	0.84	0.67	0.65	0.76	0.74	-0.73	-0.63	-0.46	-0.75	-0.77	-0.48	-0.43	-0.67	-0.615	0.00261201	0.308846	25.5264	7.62097	-0.622477	0.145492	0.145492	3.68	2.677	3.49	4.249	4.744	3.61	4.78	5.059	4.03613	0.243263	0.724037	25.2683	18.7276	4.06533	0.52737	0.129724
Dusp7:106275970.2	Dusp7:106275970	Dusp7	Proximal	chr9	106275970	106276932	0.08	0.11	0.18	0.06	0.07	0.19	0.22	0.09	0.125	-0.73	-0.63	-0.46	-0.75	-0.77	-0.48	-0.43	-0.67	-0.615	0.00261201	0.308846	25.5264	7.62097	-0.622477	0.145492	0.145492	3.68	2.677	3.49	4.249	4.744	3.61	4.78	5.059	4.03613	0.243263	0.724037	25.2683	18.7276	4.06533	0.52737	0.129724
Ebag9:44471848.8	Ebag9:44471848	Ebag9	Distal	chr15	44471848	44472379	0.28	0.14	0.15	0.31	0.36	0.45	0.2	0.12	0.25125	-0.11	-0.04	0.04	0.14	-0.05	-0.06	0.1	0.27	0.03625	0.0109731	0.487985	26.5602	12.2452	0.0431664	0.11583	0.11583	5.994	6.613	6.16	5.641	5.935	6.988	7.146	4.831	6.1635	0.0400299	0.22108	24.3805	5.28567	6.14896	0.867271	0.141044
Ebag9:44471848.9	Ebag9:44471848	Ebag9	Proximal	chr15	44471848	44472302	0.17	0.1	0.19	0.45	0.31	0.39	0.3	0.39	0.2875	-0.11	-0.04	0.04	0.14	-0.05	-0.06	0.1	0.27	0.03625	0.0109731	0.487985	26.5602	12.2452	0.0431664	0.11583	0.11583	5.994	6.613	6.16	5.641	5.935	6.988	7.146	4.831	6.1635	0.0400299	0.22108	24.3805	5.28567	6.14896	0.867271	0.141044
Edc3:57595968.1	Edc3:57595968	Edc3	Distal	chr9	57595968	57600806	0.2	0.23	0.26	0.17	0.15	0.16	0.29	0.12	0.1975	0.26	0.27	0.08	0.34	0.38	0.21	0.12	0.52	0.2725	0.0285776	0.628604	21.6353	2.75923	0.261908	0.160467	0.160467	3.133	3.497	3.578	3.38	3.078	3.5	3.369	3.158	3.33663	0.0126525	0.111481	22.757	10.635	3.34802	0.226036	0.0675135
Edc3:57595968.2	Edc3:57595968	Edc3	Proximal	chr9	57595968	57600306	0.46	0.5	0.34	0.51	0.53	0.37	0.41	0.64	0.47	0.26	0.27	0.08	0.34	0.38	0.21	0.12	0.52	0.2725	0.0285776	0.628604	21.6353	2.75923	0.261908	0.160467	0.160467	3.133	3.497	3.578	3.38	3.078	3.5	3.369	3.158	3.33663	0.0126525	0.111481	22.757	10.635	3.34802	0.226036	0.0675135
Egfr:16787270.2	Egfr:16787270	Egfr	Distal	chr11	16787270	16787647	0.41	0.46	0.53	0.36	0.38	0.42	0.43	0.36	0.41875	0.06	-0.04	-0.2	0.17	0.12	0	0.01	0.19	0.03875	0.0198141	0.56296	22.9994	21.2861	0.0327999	0.13725	0.13725	37.614	19.323	30.812	14.433	31.439	28.411	25.878	22.582	26.3115	0.981121	1	27.3333	23.1988	26.2118	4.575	0.17454
Egfr:16787270.3	Egfr:16787270	Egfr	Proximal	chr11	16787270	16787456	0.47	0.42	0.33	0.53	0.5	0.42	0.44	0.55	0.4575	0.06	-0.04	-0.2	0.17	0.12	0	0.01	0.19	0.03875	0.0198141	0.56296	22.9994	21.2861	0.0327999	0.13725	0.13725	37.614	19.323	30.812	14.433	31.439	28.411	25.878	22.582	26.3115	0.981121	1	27.3333	23.1988	26.2118	4.575	0.17454
Egr1:35022119.1	Egr1:35022119	Egr1	Distal	chr18	35022119	35024638	0.18	0.23	0.52	0.38	0.28	0.15	0.25	0.17	0.27	0.61	0.5	-0.25	0.06	0.26	0.62	0.25	0.07	0.265	0.0409544	0.741408	27.3333	24.8603	0.24021	0.352416	0.352416	295.217	72.054	9.626	3.095	7.883	37.374	6.027	6.646	54.7402	0.673934	1	24.6627	0.591223	54.5396	34.7668	0.637459
Egr1:35022119.2	Egr1:35022119	Egr1	Proximal	chr18	35022119	35024574	0.79	0.73	0.27	0.44	0.54	0.77	0.5	0.24	0.535	0.61	0.5	-0.25	0.06	0.26	0.62	0.25	0.07	0.265	0.0409544	0.741408	27.3333	24.8603	0.24021	0.352416	0.352416	295.217	72.054	9.626	3.095	7.883	37.374	6.027	6.646	54.7402	0.673934	1	24.6627	0.591223	54.5396	34.7668	0.637459
Eid1:125498836.1	Eid1:125498836	Eid1	Distal	chr2	125498836	125500521	0.89	0.71	0.58	0.68	0.82	0.6	0.69	0.93	0.7375	-0.83	-0.54	-0.3	-0.45	-0.71	-0.32	-0.49	-0.89	-0.56625	0.0166293	0.539967	21.5124	13.0021	-0.544371	0.256891	0.256891	15.69	20.621	17.839	16.549	17.786	17.202	13.723	14.37	16.7225	0.645226	1	22.8844	5.89618	16.7813	1.58252	0.0943024
Eid1:125498836.2	Eid1:125498836	Eid1	Proximal	chr2	125498836	125500330	0.06	0.17	0.28	0.23	0.11	0.28	0.2	0.04	0.17125	-0.83	-0.54	-0.3	-0.45	-0.71	-0.32	-0.49	-0.89	-0.56625	0.0166293	0.539967	21.5124	13.0021	-0.544371	0.256891	0.256891	15.69	20.621	17.839	16.549	17.786	17.202	13.723	14.37	16.7225	0.645226	1	22.8844	5.89618	16.7813	1.58252	0.0943024
Elmo2:165116061.3	Elmo2:165116061	Elmo2	Distal	chr2	165114706	165116061	0.24	0.47	0.33	0.29	0.4	0.37	0.41	0.35	0.3575	-0.06	-0.3	-0.13	0.07	0.04	-0.05	-0.11	0	-0.0675	0.00167319	0.289956	27.6638	15.85	-0.0464099	0.144716	0.144716	3.002	3.116	2.83	2.293	2.991	3.159	2.219	2.511	2.76512	0.0174682	0.133643	22.4223	5.80356	2.78055	0.396871	0.142731
Elmo2:165116061.4	Elmo2:165116061	Elmo2	Proximal	chr2	165114745	165116061	0.18	0.17	0.2	0.36	0.44	0.32	0.3	0.35	0.29	-0.06	-0.3	-0.13	0.07	0.04	-0.05	-0.11	0	-0.0675	0.00167319	0.289956	27.6638	15.85	-0.0464099	0.144716	0.144716	3.002	3.116	2.83	2.293	2.991	3.159	2.219	2.511	2.76512	0.0174682	0.133643	22.4223	5.80356	2.78055	0.396871	0.142731
Elof1:21918123.3	Elof1:21918123	Elof1	Distal	chr9	21917435	21918123	0.15	0.1	0.2	0.24	0.13	0.12	0.18	0.47	0.19875	0.66	0.75	0.56	0.48	0.71	0.73	0.57	0.01	0.55875	0.0279646	0.627298	24.3622	3.02062	0.556464	0.216599	0.216599	99.733	102.159	103.382	99.291	110.909	114.562	102.799	115.421	106.032	0.375087	0.951206	19.6214	11.7479	106.491	3.65646	0.0343359
Elof1:21918123.4	Elof1:21918123	Elof1	Proximal	chr9	21917471	21918123	0.81	0.85	0.76	0.72	0.84	0.85	0.75	0.48	0.7575	0.66	0.75	0.56	0.48	0.71	0.73	0.57	0.01	0.55875	0.0279646	0.627298	24.3622	3.02062	0.556464	0.216599	0.216599	99.733	102.159	103.382	99.291	110.909	114.562	102.799	115.421	106.032	0.375087	0.951206	19.6214	11.7479	106.491	3.65646	0.0343359
Eps8l2:148548022.1	Eps8l2:148548022	Eps8l2	Distal	chr7	148548022	148548919	0.82	0.69	0.73	0.81	0.75	0.68	0.75	0.9	0.76625	-0.64	-0.38	-0.46	-0.62	-0.5	-0.36	-0.5	-0.8	-0.5325	0.00131312	0.289956	23.2217	6.78813	-0.52675	0.171444	0.171444	39.821	36.458	12.647	22.188	35.461	30.184	10.656	24.712	26.5159	0.00119372	0.0357938	23.0744	1.22214	26.2948	13.921	0.529421
Eps8l2:148548022.2	Eps8l2:148548022	Eps8l2	Proximal	chr7	148548022	148548170	0.18	0.31	0.27	0.19	0.25	0.32	0.25	0.1	0.23375	-0.64	-0.38	-0.46	-0.62	-0.5	-0.36	-0.5	-0.8	-0.5325	0.00131312	0.289956	23.2217	6.78813	-0.52675	0.171444	0.171444	39.821	36.458	12.647	22.188	35.461	30.184	10.656	24.712	26.5159	0.00119372	0.0357938	23.0744	1.22214	26.2948	13.921	0.529421
Errfi1:150229577.1	Errfi1:150229577	Errfi1	Distal	chr4	150229577	150233522	0.65	0.9	0.9	0.7	0.56	0.77	0.83	0.6	0.73875	-0.42	-0.85	-0.85	-0.5	-0.32	-0.63	-0.72	-0.36	-0.58125	0.000871682	0.267476	24.2623	21.0805	-0.578586	0.268006	0.268006	427.796	496.05	818.822	586.254	472.618	619.827	822.898	397.272	580.192	0.00391674	0.0594273	22.1055	12.5617	593.149	212.65	0.35851
Errfi1:150229577.3	Errfi1:150229577	Errfi1	Proximal	chr4	150229577	150229832	0.23	0.05	0.05	0.2	0.24	0.14	0.11	0.24	0.1575	-0.42	-0.85	-0.85	-0.5	-0.32	-0.63	-0.72	-0.36	-0.58125	0.000871682	0.267476	24.2623	21.0805	-0.578586	0.268006	0.268006	427.796	496.05	818.822	586.254	472.618	619.827	822.898	397.272	580.192	0.00391674	0.0594273	22.1055	12.5617	593.149	212.65	0.35851
Esf1:139946641.2	Esf1:139946641	Esf1	Distal	chr2	139945780	139946641	0.25	0.32	0.16	0.2	0.22	0.48	0.36	0.3	0.28625	0.29	0.04	0.3	0.42	0.42	-0.1	0.04	0.27	0.21	0.0194125	0.559316	27.8818	13.642	0.24659	0.252523	0.252523	2.219	1.977	2.508	2.03	2.558	2.739	3.098	2.134	2.40787	0.860731	1	21.1384	18.6696	2.41433	0.0917147	0.0379877
Esf1:139946641.3	Esf1:139946641	Esf1	Proximal	chr2	139946190	139946641	0.54	0.36	0.46	0.62	0.64	0.38	0.4	0.57	0.49625	0.29	0.04	0.3	0.42	0.42	-0.1	0.04	0.27	0.21	0.0194125	0.559316	27.8818	13.642	0.24659	0.252523	0.252523	2.219	1.977	2.508	2.03	2.558	2.739	3.098	2.134	2.40787	0.860731	1	21.1384	18.6696	2.41433	0.0917147	0.0379877
Exoc3:74309692.1	Exoc3:74309692	Exoc3	Distal	chr13	74307250	74309692	0.5	0.47	0.4	0.39	0.42	0.64	0.42	0.27	0.43875	-0.14	-0.01	0.08	0.18	0.06	-0.38	0.06	0.42	0.03375	0.013409	0.516223	26.8753	12.9776	0.0553404	0.241436	0.241436	5.727	5.717	5.579	5.827	5.931	6.276	5.672	5.615	5.793	0.145369	0.513426	27.3333	21.7093	5.7987	0.231625	0.0399443
Exoc3:74309692.3	Exoc3:74309692	Exoc3	Proximal	chr13	74309440	74309692	0.36	0.46	0.48	0.57	0.48	0.26	0.48	0.69	0.4725	-0.14	-0.01	0.08	0.18	0.06	-0.38	0.06	0.42	0.03375	0.013409	0.516223	26.8753	12.9776	0.0553404	0.241436	0.241436	5.727	5.717	5.579	5.827	5.931	6.276	5.672	5.615	5.793	0.145369	0.513426	27.3333	21.7093	5.7987	0.231625	0.0399443
Exosc6:113580239.2	Exosc6:113580239	Exosc6	Distal	chr8	113580239	113581505	0.41	0.19	0.33	0.45	0.27	0.29	0.42	0.38	0.3425	0.03	0.53	0.2	-0.08	0.34	0.28	0	0.11	0.17625	0.0187767	0.552834	22.0765	6.81954	0.189272	0.234671	0.234671	19.325	15.559	20.848	18.359	19.425	15.998	22.588	18.904	18.8758	0.590007	1	22.3063	17.0637	18.8	1.89274	0.100677
Exosc6:113580239.3	Exosc6:113580239	Exosc6	Proximal	chr8	113580239	113581439	0.44	0.72	0.53	0.37	0.61	0.57	0.42	0.49	0.51875	0.03	0.53	0.2	-0.08	0.34	0.28	0	0.11	0.17625	0.0187767	0.552834	22.0765	6.81954	0.189272	0.234671	0.234671	19.325	15.559	20.848	18.359	19.425	15.998	22.588	18.904	18.8758	0.590007	1	22.3063	17.0637	18.8	1.89274	0.100677
Exosc9:36464351.3	Exosc9:36464351	Exosc9	Distal	chr3	36464351	36464649	0.3	0.24	0.63	0.44	0.15	0.15	0.3	0.1	0.28875	0.13	0.17	-0.41	-0.16	0.41	0.11	-0.11	0.39	0.06625	0.00850581	0.460481	21.8449	3.81914	0.0565683	0.374445	0.374445	8.006	7.291	7.143	7.841	9.269	7.082	6.193	6.622	7.43088	0.1699	0.572209	25.2144	21.8227	7.45692	0.88799	0.119083
Exosc9:36464351.4	Exosc9:36464351	Exosc9	Proximal	chr3	36464351	36464567	0.43	0.41	0.22	0.28	0.56	0.26	0.19	0.49	0.355	0.13	0.17	-0.41	-0.16	0.41	0.11	-0.11	0.39	0.06625	0.00850581	0.460481	21.8449	3.81914	0.0565683	0.374445	0.374445	8.006	7.291	7.143	7.841	9.269	7.082	6.193	6.622	7.43088	0.1699	0.572209	25.2144	21.8227	7.45692	0.88799	0.119083
Fam188a:12269830.1	Fam188a:12269830	Fam188a	Distal	chr2	12268890	12269830	0.38	0.33	0.34	0.24	0.25	0.21	0.37	0.36	0.31	-0.1	0.07	-0.02	-0.16	-0.05	0.14	0.09	-0.2	-0.02875	0.000783432	0.267476	24.0819	5.66989	-0.0293089	0.155151	0.155151	4.667	4.945	4.731	4.624	4.51	4.136	4.648	3.762	4.50287	0.935728	1	26.2189	5.01266	4.48765	0.166702	0.0371467
Fam188a:12269830.2	Fam188a:12269830	Fam188a	Proximal	chr2	12269221	12269830	0.28	0.4	0.32	0.08	0.2	0.35	0.46	0.16	0.28125	-0.1	0.07	-0.02	-0.16	-0.05	0.14	0.09	-0.2	-0.02875	0.000783432	0.267476	24.0819	5.66989	-0.0293089	0.155151	0.155151	4.667	4.945	4.731	4.624	4.51	4.136	4.648	3.762	4.50287	0.935728	1	26.2189	5.01266	4.48765	0.166702	0.0371467
Fam76b:13648473.1	Fam76b:13648473	Fam76b	Distal	chr9	13648473	13650974	0.23	0.33	0.46	0.32	0.31	0.23	0.35	0.24	0.30875	0.14	0.09	-0.1	0.02	0.03	-0.06	-0.26	-0.06	-0.025	0.0358471	0.710887	22.8342	1.05642	-0.0280916	0.111032	0.111032	7.144	8.273	8.385	4.655	5.594	7.2	6.475	4.269	6.49938	0.0136327	0.115928	24.0819	5.89073	6.49363	1.56908	0.241634
Fam76b:13648473.2	Fam76b:13648473	Fam76b	Proximal	chr9	13648473	13650896	0.37	0.42	0.36	0.34	0.34	0.17	0.09	0.18	0.28375	0.14	0.09	-0.1	0.02	0.03	-0.06	-0.26	-0.06	-0.025	0.0358471	0.710887	22.8342	1.05642	-0.0280916	0.111032	0.111032	7.144	8.273	8.385	4.655	5.594	7.2	6.475	4.269	6.49938	0.0136327	0.115928	24.0819	5.89073	6.49363	1.56908	0.241634
Fip1l1:74991864.1	Fip1l1:74991864	Fip1l1	Distal	chr5	74991864	74994841	0.21	0.18	0.14	0.15	0.18	0.42	0.23	0.17	0.21	0.41	0.42	0.43	0.62	0.53	0.08	0.43	0.58	0.4375	0.0115707	0.490432	26.2667	14.6551	0.453474	0.18528	0.18528	3.275	3.093	2.875	2.835	3.301	3.441	3.704	3.388	3.239	0.915158	1	27.3333	26.6628	3.21101	0.251361	0.078281
Fip1l1:74991864.2	Fip1l1:74991864	Fip1l1	Proximal	chr5	74991864	74994815	0.62	0.6	0.57	0.77	0.71	0.5	0.66	0.75	0.6475	0.41	0.42	0.43	0.62	0.53	0.08	0.43	0.58	0.4375	0.0115707	0.490432	26.2667	14.6551	0.453474	0.18528	0.18528	3.275	3.093	2.875	2.835	3.301	3.441	3.704	3.388	3.239	0.915158	1	27.3333	26.6628	3.21101	0.251361	0.078281
Flt1:148375982.1	Flt1:148375982	Flt1	Distal	chr5	148373180	148375982	0.23	0.46	0.27	0.15	0.21	0.23	0.21	0.21	0.24625	0.32	-0.18	0.05	0.49	0.35	0.29	0.21	0.21	0.2175	0.0148706	0.530173	28.4061	16.5907	0.252665	0.23163	0.23163	#N/A	#N/A	#N/A	#N/A	#N/A	#N/A	#N/A	#N/A	#N/A	#N/A	#N/A	#N/A	#N/A	#N/A	#N/A	#N/A
Flt1:148375982.2	Flt1:148375982	Flt1	Proximal	chr5	148373265	148375982	0.55	0.28	0.32	0.64	0.56	0.52	0.42	0.42	0.46375	0.32	-0.18	0.05	0.49	0.35	0.29	0.21	0.21	0.2175	0.0148706	0.530173	28.4061	16.5907	0.252665	0.23163	0.23163	#N/A	#N/A	#N/A	#N/A	#N/A	#N/A	#N/A	#N/A	#N/A	#N/A	#N/A	#N/A	#N/A	#N/A	#N/A	#N/A
Foxa3:19600479.2	Foxa3:19600479	Foxa3	Distal	chr7	19598633	19600479	0.84	0.73	0.72	0.85	0.8	0.58	0.82	0.74	0.76	-0.76	-0.56	-0.51	-0.76	-0.7	-0.26	-0.74	-0.69	-0.6225	0.0348133	0.702793	19.3647	12.9448	-0.59202	0.213376	0.213376	32.056	14.965	44.418	32.868	30.62	32.081	33.376	31.444	31.4785	0.508081	1	22.2488	15.4668	31.435	7.01383	0.223122
Foxa3:19600479.3	Foxa3:19600479	Foxa3	Proximal	chr7	19599066	19600479	0.08	0.17	0.21	0.09	0.1	0.32	0.08	0.05	0.1375	-0.76	-0.56	-0.51	-0.76	-0.7	-0.26	-0.74	-0.69	-0.6225	0.0348133	0.702793	19.3647	12.9448	-0.59202	0.213376	0.213376	32.056	14.965	44.418	32.868	30.62	32.081	33.376	31.444	31.4785	0.508081	1	22.2488	15.4668	31.435	7.01383	0.223122
Foxk1:142932430.1	Foxk1:142932430	Foxk1	Distal	chr5	142932430	142937965	0.52	0.65	0.66	0.2	0.13	0.17	0.32	0.12	0.34625	-0.3	-0.53	-0.56	0.24	0.59	0.45	0.22	0.57	0.085	0.0470766	0.798951	27.9765	17.5287	0.137436	0.397213	0.397213	2.864	3.539	3.034	2.552	2.291	3.659	3.17	2.509	2.95225	0.00973132	0.095885	25.0029	4.98778	2.92476	0.608654	0.208104
Foxk1:142932430.2	Foxk1:142932430	Foxk1	Proximal	chr5	142932430	142937776	0.22	0.12	0.1	0.44	0.72	0.62	0.54	0.69	0.43125	-0.3	-0.53	-0.56	0.24	0.59	0.45	0.22	0.57	0.085	0.0470766	0.798951	27.9765	17.5287	0.137436	0.397213	0.397213	2.864	3.539	3.034	2.552	2.291	3.659	3.17	2.509	2.95225	0.00973132	0.095885	25.0029	4.98778	2.92476	0.608654	0.208104
Fxc1:112789542.1	Fxc1:112789542	Fxc1	Distal	chr7	112789542	112790363	0.43	0.38	0.48	0.57	0.44	0.43	0.46	0.5	0.46125	0.14	0.24	0.04	-0.14	0.12	0.14	0.08	0	0.0775	0.0145282	0.524725	25.6893	1.70546	0.0698848	0.130162	0.130162	60.623	61.165	69.498	59.683	52.595	49.036	59.234	63.679	59.4391	0.342866	0.898763	27.3333	6.05063	58.859	7.13419	0.121208
Fxc1:112789542.2	Fxc1:112789542	Fxc1	Proximal	chr7	112789542	112789864	0.57	0.62	0.52	0.43	0.56	0.57	0.54	0.5	0.53875	0.14	0.24	0.04	-0.14	0.12	0.14	0.08	0	0.0775	0.0145282	0.524725	25.6893	1.70546	0.0698848	0.130162	0.130162	60.623	61.165	69.498	59.683	52.595	49.036	59.234	63.679	59.4391	0.342866	0.898763	27.3333	6.05063	58.859	7.13419	0.121208
Fyb:6613150.1	Fyb:6613150	Fyb	Distal	chr15	6613150	6615608	0.6	0.71	0.86	0.74	0.61	0.75	0.74	0.65	0.7075	-0.2	-0.42	-0.72	-0.48	-0.22	-0.5	-0.48	-0.3	-0.415	0.00321957	0.309624	22.4755	0.949778	-0.425461	0.218569	0.218569	6.436	6.522	7.252	6.839	6.996	6.394	6.231	6.404	6.63425	0.979944	1	27.3333	11.9396	6.66004	0.289058	0.0434019
Fyb:6613150.2	Fyb:6613150	Fyb	Proximal	chr15	6613150	6613308	0.4	0.29	0.14	0.26	0.39	0.25	0.26	0.35	0.2925	-0.2	-0.42	-0.72	-0.48	-0.22	-0.5	-0.48	-0.3	-0.415	0.00321957	0.309624	22.4755	0.949778	-0.425461	0.218569	0.218569	6.436	6.522	7.252	6.839	6.996	6.394	6.231	6.404	6.63425	0.979944	1	27.3333	11.9396	6.66004	0.289058	0.0434019
Fyttd1:32905618.2	Fyttd1:32905618	Fyttd1	Distal	chr16	32905618	32908512	0.14	0.1	0.21	0.23	0.22	0.11	0.29	0.34	0.205	0.6	0.63	0.44	0.31	0.39	0.61	0.24	0.17	0.42375	0.0360159	0.710887	24.0819	3.32635	0.423387	0.159567	0.159567	8.86	9.515	11.6	8.285	9.024	10.638	11.417	6.862	9.52512	0.0205216	0.147128	22.1299	11.1214	9.66922	1.84001	0.190295
Fyttd1:32905618.3	Fyttd1:32905618	Fyttd1	Proximal	chr16	32905618	32908139	0.74	0.73	0.65	0.54	0.61	0.72	0.53	0.51	0.62875	0.6	0.63	0.44	0.31	0.39	0.61	0.24	0.17	0.42375	0.0360159	0.710887	24.0819	3.32635	0.423387	0.159567	0.159567	8.86	9.515	11.6	8.285	9.024	10.638	11.417	6.862	9.52512	0.0205216	0.147128	22.1299	11.1214	9.66922	1.84001	0.190295
G6pc3:102054757.1	G6pc3:102054757	G6pc3	Distal	chr11	102054757	102059366	0.38	0.2	0.28	0.35	0.34	0.16	0.13	0.2	0.255	0.24	0.6	0.44	0.3	0.32	0.68	0.74	0.6	0.49	0.0122478	0.503359	25.7587	5.75236	0.476642	0.182044	0.182044	11.309	12.16	9.909	11.635	10.782	10.737	8.366	11.281	10.7724	0.632668	1	20.4222	3.87157	10.6636	0.901021	0.0844951
G6pc3:102054757.2	G6pc3:102054757	G6pc3	Proximal	chr11	102054757	102055395	0.62	0.8	0.72	0.65	0.66	0.84	0.87	0.8	0.745	0.24	0.6	0.44	0.3	0.32	0.68	0.74	0.6	0.49	0.0122478	0.503359	25.7587	5.75236	0.476642	0.182044	0.182044	11.309	12.16	9.909	11.635	10.782	10.737	8.366	11.281	10.7724	0.632668	1	20.4222	3.87157	10.6636	0.901021	0.0844951
Gas7:67496840.3	Gas7:67496840	Gas7	Distal	chr11	67496840	67502324	0.21	0.26	0.18	0.22	0.37	0.17	0.26	0.29	0.245	-0.1	0.1	0.15	-0.08	-0.19	0.16	-0.08	-0.16	-0.025	0.021776	0.578201	21.8243	10.9248	-0.0106452	0.151674	0.151674	#N/A	#N/A	#N/A	#N/A	#N/A	#N/A	#N/A	#N/A	#N/A	#N/A	#N/A	#N/A	#N/A	#N/A	#N/A	#N/A
Gas7:67496840.5	Gas7:67496840	Gas7	Proximal	chr11	67496840	67499245	0.11	0.36	0.33	0.14	0.18	0.33	0.18	0.13	0.22	-0.1	0.1	0.15	-0.08	-0.19	0.16	-0.08	-0.16	-0.025	0.021776	0.578201	21.8243	10.9248	-0.0106452	0.151674	0.151674	#N/A	#N/A	#N/A	#N/A	#N/A	#N/A	#N/A	#N/A	#N/A	#N/A	#N/A	#N/A	#N/A	#N/A	#N/A	#N/A
Ggta1:35258322.2	Ggta1:35258322	Ggta1	Distal	chr2	35255701	35258322	0.17	0.29	0.22	0.24	0.2	0.32	0.25	0.15	0.23	0.16	0.04	0.1	0.21	0.24	0.01	0.08	0.2	0.13	0.00381138	0.328039	26.8921	15.4392	0.143462	0.112414	0.112414	#N/A	#N/A	#N/A	#N/A	#N/A	#N/A	#N/A	#N/A	#N/A	#N/A	#N/A	#N/A	#N/A	#N/A	#N/A	#N/A
Ggta1:35258322.3	Ggta1:35258322	Ggta1	Proximal	chr2	35255800	35258322	0.33	0.33	0.32	0.45	0.44	0.33	0.33	0.35	0.36	0.16	0.04	0.1	0.21	0.24	0.01	0.08	0.2	0.13	0.00381138	0.328039	26.8921	15.4392	0.143462	0.112414	0.112414	#N/A	#N/A	#N/A	#N/A	#N/A	#N/A	#N/A	#N/A	#N/A	#N/A	#N/A	#N/A	#N/A	#N/A	#N/A	#N/A
Gnl1:36125466.3	Gnl1:36125466	Gnl1	Distal	chr17	36125466	36126354	0.18	0.1	0.16	0.19	0.17	0.15	0.22	0.25	0.1775	0.36	0.65	0.46	0.37	0.46	0.51	0.36	0.19	0.42	0.0486604	0.798951	22.9713	6.71398	0.425546	0.133219	0.133219	9.375	11.093	16.661	10.411	10.142	12.004	13.552	10.717	11.7444	0.00146541	0.0389057	23.0219	10.9404	11.8449	2.85293	0.240856
Gnl1:36125466.4	Gnl1:36125466	Gnl1	Proximal	chr17	36125466	36125812	0.54	0.75	0.62	0.56	0.63	0.66	0.58	0.44	0.5975	0.36	0.65	0.46	0.37	0.46	0.51	0.36	0.19	0.42	0.0486604	0.798951	22.9713	6.71398	0.425546	0.133219	0.133219	9.375	11.093	16.661	10.411	10.142	12.004	13.552	10.717	11.7444	0.00146541	0.0389057	23.0219	10.9404	11.8449	2.85293	0.240856
Gpr19:134820461.2	Gpr19:134820461	Gpr19	Distal	chr6	134819126	134820461	0.27	0.35	0.39	0.31	0.31	0.34	0.3	0.23	0.3125	0.32	0.18	0.05	0.26	0.24	0.17	0.22	0.4	0.23	0.00356873	0.322078	21.8284	1.36551	0.221084	0.110927	0.110927	1.405	1.478	0.999	0.875	1.154	1.312	1.124	1.103	1.18125	0.0904845	0.375054	24.9855	1.97714	1.17526	0.213015	0.18125
Gpr19:134820461.3	Gpr19:134820461	Gpr19	Proximal	chr6	134819175	134820461	0.59	0.53	0.44	0.57	0.55	0.51	0.52	0.63	0.5425	0.32	0.18	0.05	0.26	0.24	0.17	0.22	0.4	0.23	0.00356873	0.322078	21.8284	1.36551	0.221084	0.110927	0.110927	1.405	1.478	0.999	0.875	1.154	1.312	1.124	1.103	1.18125	0.0904845	0.375054	24.9855	1.97714	1.17526	0.213015	0.18125
Gps1:120649984.1	Gps1:120649984	Gps1	Distal	chr11	120649984	120650680	0.69	0.45	0.56	0.73	0.68	0.57	0.86	0.95	0.68625	-0.41	0.08	-0.14	-0.48	-0.38	-0.17	-0.76	-0.91	-0.39625	0.0101045	0.473127	22.1326	6.8035	-0.379775	0.297482	0.297482	16.067	16.113	17.092	15.301	16.507	14.474	11.451	10.95	14.7444	0.961027	1	22.8648	6.34147	14.7655	0.508131	0.0344133
Gps1:120649984.3	Gps1:120649984	Gps1	Proximal	chr11	120649984	120650421	0.28	0.53	0.42	0.25	0.3	0.4	0.1	0.04	0.29	-0.41	0.08	-0.14	-0.48	-0.38	-0.17	-0.76	-0.91	-0.39625	0.0101045	0.473127	22.1326	6.8035	-0.379775	0.297482	0.297482	16.067	16.113	17.092	15.301	16.507	14.474	11.451	10.95	14.7444	0.961027	1	22.8648	6.34147	14.7655	0.508131	0.0344133
Gsk3a:26013949.1	Gsk3a:26013949	Gsk3a	Distal	chr7	26013278	26013949	0.55	0.77	0.91	0.63	0.66	0.77	0.71	0.44	0.68	-0.1	-0.54	-0.82	-0.26	-0.32	-0.54	-0.42	0.12	-0.36	0.00352029	0.322078	22.1099	0.36123	-0.384477	0.319908	0.319908	31.092	35.344	40.884	33.422	35.026	42.252	37.608	37.565	36.6491	0.0551162	0.272506	21.9513	11.362	36.9373	3.38124	0.09154
Gsk3a:26013949.2	Gsk3a:26013949	Gsk3a	Proximal	chr7	26013445	26013949	0.45	0.23	0.09	0.37	0.34	0.23	0.29	0.56	0.32	-0.1	-0.54	-0.82	-0.26	-0.32	-0.54	-0.42	0.12	-0.36	0.00352029	0.322078	22.1099	0.36123	-0.384477	0.319908	0.319908	31.092	35.344	40.884	33.422	35.026	42.252	37.608	37.565	36.6491	0.0551162	0.272506	21.9513	11.362	36.9373	3.38124	0.09154
H2afj:136756769.1	H2afj:136756769	H2afj	Distal	chr6	136756769	136758591	0.2	0.11	0.17	0.24	0.28	0.23	0.13	0.25	0.20125	0.6	0.78	0.66	0.52	0.44	0.54	0.74	0.5	0.5975	0.0363708	0.711447	27.702	2.69199	0.575579	0.154323	0.154323	53.753	39.858	38.738	38.56	34.531	28.693	40.271	37.008	38.9265	0.671343	1	20.032	1.42037	38.1661	5.83666	0.152928
H2afj:136756769.2	H2afj:136756769	H2afj	Proximal	chr6	136756769	136757319	0.8	0.89	0.83	0.76	0.72	0.77	0.87	0.75	0.79875	0.6	0.78	0.66	0.52	0.44	0.54	0.74	0.5	0.5975	0.0363708	0.711447	27.702	2.69199	0.575579	0.154323	0.154323	53.753	39.858	38.738	38.56	34.531	28.693	40.271	37.008	38.9265	0.671343	1	20.032	1.42037	38.1661	5.83666	0.152928
Hacl1:32439525.1	Hacl1:32439525	Hacl1	Distal	chr14	32437822	32439525	0.83	0.83	0.72	0.84	0.84	0.73	0.71	0.86	0.795	-0.66	-0.66	-0.44	-0.68	-0.68	-0.46	-0.42	-0.72	-0.59	0.025668	0.613473	21.7628	12.374	-0.577838	0.147482	0.147482	117.842	83.113	49.376	80.394	145.657	73.674	34.543	108.142	86.5926	0.00352148	0.0568471	23.5742	22.1021	85.8834	47.5089	0.55318
Hacl1:32439525.2	Hacl1:32439525	Hacl1	Proximal	chr14	32439343	32439525	0.17	0.17	0.28	0.16	0.16	0.27	0.29	0.14	0.205	-0.66	-0.66	-0.44	-0.68	-0.68	-0.46	-0.42	-0.72	-0.59	0.025668	0.613473	21.7628	12.374	-0.577838	0.147482	0.147482	117.842	83.113	49.376	80.394	145.657	73.674	34.543	108.142	86.5926	0.00352148	0.0568471	23.5742	22.1021	85.8834	47.5089	0.55318
Higd1a:121758807.1	Higd1a:121758807	Higd1a	Distal	chr9	121757678	121758807	0.69	0.35	0.23	0.63	0.67	0.64	0.4	0.63	0.53	-0.38	0.3	0.54	-0.26	-0.34	-0.28	0.2	-0.26	-0.06	0.0306011	0.649824	26.6404	6.47606	-0.0938267	0.437618	0.437618	15.77	11.718	12.263	17.187	15.566	14.221	14.362	14.483	14.4463	0.116571	0.44276	25.6537	17.7823	14.5954	2.04233	0.139929
Higd1a:121758807.2	Higd1a:121758807	Higd1a	Proximal	chr9	121758641	121758807	0.31	0.65	0.77	0.37	0.33	0.36	0.6	0.37	0.47	-0.38	0.3	0.54	-0.26	-0.34	-0.28	0.2	-0.26	-0.06	0.0306011	0.649824	26.6404	6.47606	-0.0938267	0.437618	0.437618	15.77	11.718	12.263	17.187	15.566	14.221	14.362	14.483	14.4463	0.116571	0.44276	25.6537	17.7823	14.5954	2.04233	0.139929
Hinfp:44104663.2	Hinfp:44104663	Hinfp	Distal	chr9	44098297	44104663	0.19	0.1	0.18	0.32	0.31	0.14	0.26	0.3	0.225	0.24	0.47	0.37	0.12	0.16	0.4	0.06	0.07	0.23625	0.0192403	0.556969	22.2026	8.24109	0.247462	0.150852	0.150852	5.204	6.161	6.564	5.882	4.686	8.814	6.681	5.311	6.16287	0.0563278	0.275952	21.6457	12.2026	6.27341	1.21087	0.193017
Hinfp:44104663.3	Hinfp:44104663	Hinfp	Proximal	chr9	44100521	44104663	0.43	0.57	0.55	0.44	0.47	0.54	0.32	0.37	0.46125	0.24	0.47	0.37	0.12	0.16	0.4	0.06	0.07	0.23625	0.0192403	0.556969	22.2026	8.24109	0.247462	0.150852	0.150852	5.204	6.161	6.564	5.882	4.686	8.814	6.681	5.311	6.16287	0.0563278	0.275952	21.6457	12.2026	6.27341	1.21087	0.193017
Hnrnpa1:103074687.1	Hnrnpa1:103074687	Hnrnpa1	Distal	chr15	103074687	103077123	0.28	0.25	0.28	0.41	0.31	0.4	0.48	0.63	0.38	0.13	0.22	0.16	-0.24	0.01	-0.01	-0.39	-0.43	-0.06875	0.0466448	0.798951	22.3749	5.06883	-0.0644408	0.173123	0.173123	42.877	43.769	44.144	40.323	43.14	55.117	36.018	34.079	42.4334	0.132576	0.481944	22.2947	7.79976	42.8119	5.57121	0.130132
Hnrnpa1:103074687.4	Hnrnpa1:103074687	Hnrnpa1	Proximal	chr15	103074687	103075023	0.41	0.47	0.44	0.17	0.32	0.39	0.09	0.2	0.31125	0.13	0.22	0.16	-0.24	0.01	-0.01	-0.39	-0.43	-0.06875	0.0466448	0.798951	22.3749	5.06883	-0.0644408	0.173123	0.173123	42.877	43.769	44.144	40.323	43.14	55.117	36.018	34.079	42.4334	0.132576	0.481944	22.2947	7.79976	42.8119	5.57121	0.130132
Hnrnph1:50194328.1	Hnrnph1:50194328	Hnrnph1	Distal	chr11	50194328	50194711	0.44	0.55	0.7	0.69	0.5	0.54	0.63	0.72	0.59625	0.12	-0.1	-0.4	-0.38	0	-0.08	-0.26	-0.44	-0.1925	0.00218252	0.298389	26.8753	23.8	-0.198716	0.232372	0.232372	87.611	87.43	85.973	79.106	77.839	99.477	94.592	74.328	85.7945	0.0906513	0.375619	27.4556	27.4535	84.4892	10.1796	0.120484
Hnrnph1:50194328.2	Hnrnph1:50194328	Hnrnph1	Proximal	chr11	50194328	50194601	0.56	0.45	0.3	0.31	0.5	0.46	0.37	0.28	0.40375	0.12	-0.1	-0.4	-0.38	0	-0.08	-0.26	-0.44	-0.1925	0.00218252	0.298389	26.8753	23.8	-0.198716	0.232372	0.232372	87.611	87.43	85.973	79.106	77.839	99.477	94.592	74.328	85.7945	0.0906513	0.375619	27.4556	27.4535	84.4892	10.1796	0.120484
Hnrnpul2:8905945.1	Hnrnpul2:8905945	Hnrnpul2	Distal	chr19	8905945	8908633	0.89	0.6	0.64	0.68	0.76	0.47	0.52	0.64	0.65	-0.78	-0.2	-0.28	-0.36	-0.52	0.06	-0.04	-0.28	-0.3	0.0494437	0.800622	23.7022	8.91056	-0.296836	0.247521	0.247521	51.754	45.868	52.243	54.244	52.678	58.46	61.582	51.648	53.5596	0.00335673	0.0561479	20.1144	15.8904	53.8929	3.97842	0.0738209
Hnrnpul2:8905945.2	Hnrnpul2:8905945	Hnrnpul2	Proximal	chr19	8905945	8906549	0.11	0.4	0.36	0.32	0.24	0.53	0.48	0.36	0.35	-0.78	-0.2	-0.28	-0.36	-0.52	0.06	-0.04	-0.28	-0.3	0.0494437	0.800622	23.7022	8.91056	-0.296836	0.247521	0.247521	51.754	45.868	52.243	54.244	52.678	58.46	61.582	51.648	53.5596	0.00335673	0.0561479	20.1144	15.8904	53.8929	3.97842	0.0738209
Hprt:50374244.2	Hprt:50374244	Hprt	Distal	chrX	50374244	50374759	0.46	0.49	0.54	0.57	0.51	0.46	0.54	0.74	0.53875	-0.08	-0.13	-0.31	-0.31	-0.16	0	-0.17	-0.57	-0.21625	0.028416	0.627298	26.9855	24.8837	-0.227924	0.197662	0.197662	13.739	11.364	12.99	12.121	13.151	10.87	12.005	10.221	12.0576	0.979612	1	28.6604	15.6828	12.1521	0.565799	0.0465599
Hprt:50374244.3	Hprt:50374244	Hprt	Proximal	chrX	50374244	50374407	0.38	0.36	0.23	0.26	0.35	0.46	0.37	0.17	0.3225	-0.08	-0.13	-0.31	-0.31	-0.16	0	-0.17	-0.57	-0.21625	0.028416	0.627298	26.9855	24.8837	-0.227924	0.197662	0.197662	13.739	11.364	12.99	12.121	13.151	10.87	12.005	10.221	12.0576	0.979612	1	28.6604	15.6828	12.1521	0.565799	0.0465599
Hsp90aa1:111929859.4	Hsp90aa1:111929859	Hsp90aa1	Distal	chr12	111929154	111929859	0.16	0.24	0.09	0.09	0.19	0.19	0.11	0.07	0.1425	0.67	0.51	0.81	0.82	0.62	0.6	0.77	0.84	0.705	0.00300014	0.308846	23.4726	15.8285	0.703049	0.1455	0.1455	14.916	6.662	14.868	35.834	25.488	10.797	14.942	35.176	19.8354	0.00129294	0.0371437	25.3531	16.2735	20.6093	13.5096	0.655507
Hsp90aa1:111929859.5	Hsp90aa1:111929859	Hsp90aa1	Proximal	chr12	111929235	111929859	0.83	0.75	0.9	0.91	0.81	0.79	0.88	0.91	0.8475	0.67	0.51	0.81	0.82	0.62	0.6	0.77	0.84	0.705	0.00300014	0.308846	23.4726	15.8285	0.703049	0.1455	0.1455	14.916	6.662	14.868	35.834	25.488	10.797	14.942	35.176	19.8354	0.00129294	0.0371437	25.3531	16.2735	20.6093	13.5096	0.655507
Hspa4:53075317.1	Hspa4:53075317	Hspa4	Distal	chr11	53073316	53075317	0.25	0.28	0.2	0.26	0.34	0.29	0.13	0.2	0.24375	-0.01	0.18	0.46	0.24	-0.06	0.16	0.45	0.39	0.22625	0.0020265	0.289956	26.46	8.29621	0.216816	0.237157	0.237157	25.344	22.708	28.684	28.977	26.949	27.496	30.468	26.563	27.1486	0.0791379	0.342205	21.7325	17.1701	27.0784	1.86473	0.068864
Hspa4:53075317.4	Hspa4:53075317	Hspa4	Proximal	chr11	53075073	53075317	0.24	0.46	0.66	0.5	0.28	0.45	0.58	0.59	0.47	-0.01	0.18	0.46	0.24	-0.06	0.16	0.45	0.39	0.22625	0.0020265	0.289956	26.46	8.29621	0.216816	0.237157	0.237157	25.344	22.708	28.684	28.977	26.949	27.496	30.468	26.563	27.1486	0.0791379	0.342205	21.7325	17.1701	27.0784	1.86473	0.068864
Id1:152562708.1	Id1:152562708	Id1	Distal	chr2	152562708	152563146	0.19	0.48	0.61	0.15	0.11	0.05	0.56	0.31	0.3075	0.35	-0.22	-0.31	0.42	0.56	0.55	-0.19	0.28	0.18	0.0301282	0.646349	28.0074	17.9827	0.237683	0.469169	0.469169	23.792	21.366	24.936	15.404	16.685	51.992	47.371	14.52	27.0083	0.237847	0.71357	24.3622	5.77179	26.7746	14.2226	0.531196
Id1:152562708.2	Id1:152562708	Id1	Proximal	chr2	152562708	152563081	0.54	0.26	0.3	0.57	0.67	0.6	0.37	0.59	0.4875	0.35	-0.22	-0.31	0.42	0.56	0.55	-0.19	0.28	0.18	0.0301282	0.646349	28.0074	17.9827	0.237683	0.469169	0.469169	23.792	21.366	24.936	15.404	16.685	51.992	47.371	14.52	27.0083	0.237847	0.71357	24.3622	5.77179	26.7746	14.2226	0.531196
Igf2r:12876992.2	Igf2r:12876992	Igf2r	Distal	chr17	12875325	12876992	0.54	0.59	0.36	0.57	0.55	0.59	0.54	0.37	0.51375	-0.43	-0.38	-0.18	-0.34	-0.4	-0.46	-0.35	-0.12	-0.3325	0.00920848	0.467711	27.3333	8.59591	-0.333485	0.132534	0.132534	3.505	4.099	4.059	3.575	3.582	4.516	3.596	3.326	3.78225	0.000268929	0.0215343	21.9397	9.32203	3.82303	0.455009	0.119018
Igf2r:12876992.3	Igf2r:12876992	Igf2r	Proximal	chr17	12876216	12876992	0.11	0.21	0.18	0.23	0.15	0.13	0.19	0.25	0.18125	-0.43	-0.38	-0.18	-0.34	-0.4	-0.46	-0.35	-0.12	-0.3325	0.00920848	0.467711	27.3333	8.59591	-0.333485	0.132534	0.132534	3.505	4.099	4.059	3.575	3.582	4.516	3.596	3.326	3.78225	0.000268929	0.0215343	21.9397	9.32203	3.82303	0.455009	0.119018
Igfbp5:72909082.2	Igfbp5:72909082	Igfbp5	Distal	chr1	72904562	72909082	0.25	0.36	0.23	0.22	0.16	0.22	0.31	0.24	0.24875	0.2	0.02	0.08	0.41	0.55	0.3	0.06	0.3	0.24	0.00332638	0.309624	28.244	17.1088	0.274238	0.241647	0.241647	3.029	4.115	4.153	6.894	6.801	4.103	4.271	10.382	5.4685	0.102443	0.406668	27.6943	13.8152	5.75988	2.0916	0.363132
Igfbp5:72909082.3	Igfbp5:72909082	Igfbp5	Proximal	chr1	72904615	72909082	0.45	0.38	0.31	0.63	0.71	0.52	0.37	0.54	0.48875	0.2	0.02	0.08	0.41	0.55	0.3	0.06	0.3	0.24	0.00332638	0.309624	28.244	17.1088	0.274238	0.241647	0.241647	3.029	4.115	4.153	6.894	6.801	4.103	4.271	10.382	5.4685	0.102443	0.406668	27.6943	13.8152	5.75988	2.0916	0.363132
Ikbkap:56764591.4	Ikbkap:56764591	Ikbkap	Distal	chr4	56763771	56764591	0.35	0.44	0.41	0.26	0.22	0.42	0.25	0.26	0.32625	0.06	-0.14	-0.14	0.1	0.19	-0.22	0.04	0.08	-0.00375	0.0465351	0.798951	22.4968	19.7563	-0.0142467	0.156511	0.156511	2.304	2.082	1.974	1.837	2.173	2.304	1.766	1.668	2.0135	0.0446738	0.236615	26.5602	24.6437	2.00428	0.233492	0.116497
Ikbkap:56764591.5	Ikbkap:56764591	Ikbkap	Proximal	chr4	56763875	56764591	0.41	0.3	0.27	0.36	0.41	0.2	0.29	0.34	0.3225	0.06	-0.14	-0.14	0.1	0.19	-0.22	0.04	0.08	-0.00375	0.0465351	0.798951	22.4968	19.7563	-0.0142467	0.156511	0.156511	2.304	2.082	1.974	1.837	2.173	2.304	1.766	1.668	2.0135	0.0446738	0.236615	26.5602	24.6437	2.00428	0.233492	0.116497
Il12rb1:73344414.1	Il12rb1:73344414	Il12rb1	Distal	chr8	73344414	73347439	0.41	0.63	0.82	0.51	0.52	0.78	0.85	0.82	0.6675	0.18	-0.26	-0.64	-0.02	-0.04	-0.56	-0.7	-0.64	-0.335	0.0437523	0.776035	24.9177	20.151	-0.323076	0.329268	0.329268	#N/A	#N/A	#N/A	#N/A	#N/A	#N/A	#N/A	#N/A	#N/A	#N/A	#N/A	#N/A	#N/A	#N/A	#N/A	#N/A
Il12rb1:73344414.2	Il12rb1:73344414	Il12rb1	Proximal	chr8	73344414	73345323	0.59	0.37	0.18	0.49	0.48	0.22	0.15	0.18	0.3325	0.18	-0.26	-0.64	-0.02	-0.04	-0.56	-0.7	-0.64	-0.335	0.0437523	0.776035	24.9177	20.151	-0.323076	0.329268	0.329268	#N/A	#N/A	#N/A	#N/A	#N/A	#N/A	#N/A	#N/A	#N/A	#N/A	#N/A	#N/A	#N/A	#N/A	#N/A	#N/A
Ilf3:21209140.1.1	Ilf3:21209140.1	Ilf3	Distal	chr9	21209140	21209807	0.59	0.62	0.53	0.11	0.04	0.13	0.32	0.08	0.3025	-0.44	-0.48	-0.37	0.22	0.27	0.07	-0.1	0.34	-0.06125	0.0421447	0.756263	28.2127	16.0481	-0.0155181	0.292489	0.292489	3.752	3.293	3.854	3.62	4.034	4.231	3.815	4.18	3.84737	0.99146	1	27.3333	22.9358	3.84591	0.107363	0.0279162
Ilf3:21209140.4.1	Ilf3:21209140.1	Ilf3	Proximal	chr9	21209140	21209551	0.15	0.14	0.16	0.33	0.31	0.2	0.22	0.42	0.24125	-0.44	-0.48	-0.37	0.22	0.27	0.07	-0.1	0.34	-0.06125	0.0421447	0.756263	28.2127	16.0481	-0.0155181	0.292489	0.292489	3.752	3.293	3.854	3.62	4.034	4.231	3.815	4.18	3.84737	0.99146	1	27.3333	22.9358	3.84591	0.107363	0.0279162
Ing2:48754690.3	Ing2:48754690	Ing2	Distal	chr8	48753878	48754690	0.6	0.74	0.7	0.47	0.64	0.69	0.87	0.73	0.68	-0.35	-0.58	-0.54	-0.04	-0.41	-0.46	-0.81	-0.51	-0.4625	0.00967889	0.467711	28.6604	14.8156	-0.418143	0.255696	0.255696	8.267	9.434	8.823	7.76	7.474	11.008	11.35	7.732	8.981	0.0355066	0.204609	27.2144	2.83134	8.76634	1.64112	0.187207
Ing2:48754690.4	Ing2:48754690	Ing2	Proximal	chr8	48754155	48754690	0.25	0.16	0.16	0.43	0.23	0.23	0.06	0.22	0.2175	-0.35	-0.58	-0.54	-0.04	-0.41	-0.46	-0.81	-0.51	-0.4625	0.00967889	0.467711	28.6604	14.8156	-0.418143	0.255696	0.255696	8.267	9.434	8.823	7.76	7.474	11.008	11.35	7.732	8.981	0.0355066	0.204609	27.2144	2.83134	8.76634	1.64112	0.187207
Inpp5k:75461154.1	Inpp5k:75461154	Inpp5k	Distal	chr11	75461154	75462367	0.26	0.25	0.28	0.3	0.28	0.11	0.17	0.25	0.2375	0.27	0.33	0.26	0.1	0.09	0.51	0.43	0.18	0.27125	0.0171538	0.542644	27.5535	1.08289	0.244375	0.189233	0.189233	8.922	10.517	8.894	7.391	8.524	9.757	7.697	7.698	8.675	0.00309699	0.0537478	22.6243	6.28017	8.72914	1.20112	0.137598
Inpp5k:75461154.2	Inpp5k:75461154	Inpp5k	Proximal	chr11	75461154	75462305	0.53	0.58	0.54	0.4	0.37	0.62	0.6	0.43	0.50875	0.27	0.33	0.26	0.1	0.09	0.51	0.43	0.18	0.27125	0.0171538	0.542644	27.5535	1.08289	0.244375	0.189233	0.189233	8.922	10.517	8.894	7.391	8.524	9.757	7.697	7.698	8.675	0.00309699	0.0537478	22.6243	6.28017	8.72914	1.20112	0.137598
Ip6k2:108699615.1	Ip6k2:108699615	Ip6k2	Distal	chr9	108699615	108700325	0.45	0.38	0.63	0.46	0.31	0.45	0.45	0.17	0.4125	0.01	0.15	-0.4	0.02	0.22	-0.04	-0.14	0.27	0.01125	0.0130866	0.516223	21.3423	4.38147	0.000306563	0.262818	0.262818	18.368	29.593	19.876	24.758	14.95	22.501	27.088	14.738	21.484	0.62742	1	24.8199	7.2016	21.3125	4.90237	0.230023
Ip6k2:108699615.2	Ip6k2:108699615	Ip6k2	Proximal	chr9	108699615	108700246	0.46	0.53	0.23	0.48	0.53	0.41	0.31	0.44	0.42375	0.01	0.15	-0.4	0.02	0.22	-0.04	-0.14	0.27	0.01125	0.0130866	0.516223	21.3423	4.38147	0.000306563	0.262818	0.262818	18.368	29.593	19.876	24.758	14.95	22.501	27.088	14.738	21.484	0.62742	1	24.8199	7.2016	21.3125	4.90237	0.230023
Itgb1bp1:21276818.3	Itgb1bp1:21276818	Itgb1bp1	Distal	chr12	21273458	21276818	0.71	0.78	0.17	0.3	0.72	0.53	0.29	0.34	0.48	-0.64	-0.7	0.21	0.11	-0.66	-0.45	-0.12	-0.22	-0.30875	0.0263103	0.613473	23.1021	13.5509	-0.305653	0.482054	0.482054	4.595	4.812	4.674	4.143	4.517	4.057	4.222	3.541	4.32012	0.828733	1	23.6992	4.71738	4.32197	0.176681	0.0408797
Itgb1bp1:21276818.6	Itgb1bp1:21276818	Itgb1bp1	Proximal	chr12	21276557	21276818	0.07	0.08	0.38	0.41	0.06	0.08	0.17	0.12	0.17125	-0.64	-0.7	0.21	0.11	-0.66	-0.45	-0.12	-0.22	-0.30875	0.0263103	0.613473	23.1021	13.5509	-0.305653	0.482054	0.482054	4.595	4.812	4.674	4.143	4.517	4.057	4.222	3.541	4.32012	0.828733	1	23.6992	4.71738	4.32197	0.176681	0.0408797
Jagn1:113397252.2	Jagn1:113397252	Jagn1	Distal	chr6	113397252	113398168	0.41	0.39	0.48	0.5	0.47	0.36	0.23	0.44	0.41	-0.09	0.15	-0.09	-0.17	-0.01	0.13	0.12	-0.26	-0.0275	0.0144542	0.524725	24.6181	4.34892	-0.0322506	0.18529	0.18529	29.521	21.52	32.781	29.059	25.577	25.698	28.05	25.031	27.1546	0.219846	0.677736	19.9248	18.4512	27.0974	3.44482	0.127127
Jagn1:113397252.3	Jagn1:113397252	Jagn1	Proximal	chr6	113397252	113398100	0.32	0.54	0.39	0.33	0.46	0.49	0.35	0.18	0.3825	-0.09	0.15	-0.09	-0.17	-0.01	0.13	0.12	-0.26	-0.0275	0.0144542	0.524725	24.6181	4.34892	-0.0322506	0.18529	0.18529	29.521	21.52	32.781	29.059	25.577	25.698	28.05	25.031	27.1546	0.219846	0.677736	19.9248	18.4512	27.0974	3.44482	0.127127
Jmjd4:59268809.1	Jmjd4:59268809	Jmjd4	Distal	chr11	59268809	59276473	0.29	0.42	0.43	0.31	0.27	0.47	0.49	0.31	0.37375	-0.21	-0.36	-0.31	-0.1	-0.07	-0.34	-0.44	-0.09	-0.24	0.000396236	0.187054	27.0538	16.4269	-0.216063	0.189874	0.189874	8.975	9.337	11.598	9.571	9.013	10.575	9.815	8.955	9.72987	0.00544928	0.0705412	21.4099	13.104	9.8269	1.09203	0.111127
Jmjd4:59268809.7	Jmjd4:59268809	Jmjd4	Proximal	chr11	59268809	59271723	0.08	0.06	0.12	0.21	0.2	0.13	0.05	0.22	0.13375	-0.21	-0.36	-0.31	-0.1	-0.07	-0.34	-0.44	-0.09	-0.24	0.000396236	0.187054	27.0538	16.4269	-0.216063	0.189874	0.189874	8.975	9.337	11.598	9.571	9.013	10.575	9.815	8.955	9.72987	0.00544928	0.0705412	21.4099	13.104	9.8269	1.09203	0.111127
Kdm5c:148707252.6	Kdm5c:148707252	Kdm5c	Distal	chrX	148707252	148708350	0.47	0.51	0.51	0.59	0.42	0.48	0.59	0.58	0.51875	-0.3	-0.31	-0.36	-0.48	-0.19	-0.27	-0.48	-0.36	-0.34375	0.0420278	0.756263	22.5279	3.21228	-0.344629	0.12904	0.12904	11.364	9.928	10.979	11.041	10.892	10.317	9.082	10.187	10.4737	0.472739	1	27.0985	15.8824	10.5695	0.745542	0.0705373
Kdm5c:148707252.7	Kdm5c:148707252	Kdm5c	Proximal	chrX	148707252	148708300	0.17	0.2	0.15	0.11	0.23	0.21	0.11	0.22	0.175	-0.3	-0.31	-0.36	-0.48	-0.19	-0.27	-0.48	-0.36	-0.34375	0.0420278	0.756263	22.5279	3.21228	-0.344629	0.12904	0.12904	11.364	9.928	10.979	11.041	10.892	10.317	9.082	10.187	10.4737	0.472739	1	27.0985	15.8824	10.5695	0.745542	0.0705373
Kit:76050439.1	Kit:76050439	Kit	Distal	chr5	76050439	76052747	0.87	0.9	0.94	0.94	0.9	0.8	0.89	0.93	0.89625	-0.74	-0.8	-0.88	-0.88	-0.8	-0.6	-0.78	-0.86	-0.7925	0.0471323	0.798951	27.3333	25.3738	-0.801892	0.112349	0.112349	#N/A	#N/A	#N/A	#N/A	#N/A	#N/A	#N/A	#N/A	#N/A	#N/A	#N/A	#N/A	#N/A	#N/A	#N/A	#N/A
Kit:76050439.2	Kit:76050439	Kit	Proximal	chr5	76050439	76051425	0.13	0.1	0.06	0.06	0.1	0.2	0.11	0.07	0.10375	-0.74	-0.8	-0.88	-0.88	-0.8	-0.6	-0.78	-0.86	-0.7925	0.0471323	0.798951	27.3333	25.3738	-0.801892	0.112349	0.112349	#N/A	#N/A	#N/A	#N/A	#N/A	#N/A	#N/A	#N/A	#N/A	#N/A	#N/A	#N/A	#N/A	#N/A	#N/A	#N/A
Klhl3:58106565.2	Klhl3:58106565	Klhl3	Distal	chr13	58101672	58106565	0.43	0.24	0.28	0.28	0.43	0.22	0.27	0.27	0.3025	-0.21	0.08	0.18	0.05	-0.2	0.17	0.02	-0.08	0.00125	0.0130684	0.516223	22.4495	11.2872	0.0115909	0.171697	0.171697	#N/A	#N/A	#N/A	#N/A	#N/A	#N/A	#N/A	#N/A	#N/A	#N/A	#N/A	#N/A	#N/A	#N/A	#N/A	#N/A
Klhl3:58106565.3	Klhl3:58106565	Klhl3	Proximal	chr13	58101909	58106565	0.22	0.32	0.46	0.33	0.23	0.39	0.29	0.19	0.30375	-0.21	0.08	0.18	0.05	-0.2	0.17	0.02	-0.08	0.00125	0.0130684	0.516223	22.4495	11.2872	0.0115909	0.171697	0.171697	#N/A	#N/A	#N/A	#N/A	#N/A	#N/A	#N/A	#N/A	#N/A	#N/A	#N/A	#N/A	#N/A	#N/A	#N/A	#N/A
Krba1:48365575.7	Krba1:48365575	Krba1	Distal	chr6	48365575	48366905	0.22	0.15	0.26	0.18	0.12	0.21	0.25	0.1	0.18625	0.16	0.42	0.19	0.27	0.46	0.28	-0.01	0.5	0.28375	0.0269377	0.613473	19.3872	7.30991	0.267476	0.199518	0.199518	5.052	6.096	4.54	5.476	4.259	5.296	4.222	4.886	4.97837	0.999303	1	23.2697	4.68871	4.98215	0.184304	0.0369928
Krba1:48365575.8	Krba1:48365575	Krba1	Proximal	chr6	48365575	48366786	0.38	0.57	0.45	0.45	0.58	0.49	0.24	0.6	0.47	0.16	0.42	0.19	0.27	0.46	0.28	-0.01	0.5	0.28375	0.0269377	0.613473	19.3872	7.30991	0.267476	0.199518	0.199518	5.052	6.096	4.54	5.476	4.259	5.296	4.222	4.886	4.97837	0.999303	1	23.2697	4.68871	4.98215	0.184304	0.0369928
Lcp2:33990565.6	Lcp2:33990565	Lcp2	Distal	chr11	33990565	33991159	0.24	0.14	0.24	0.24	0.22	0.21	0.29	0.12	0.2125	0.07	-0.01	-0.08	0.11	0.24	0.02	-0.07	0.23	0.06375	0.00810512	0.460481	24.0819	21.217	0.0642163	0.149085	0.149085	#N/A	#N/A	#N/A	#N/A	#N/A	#N/A	#N/A	#N/A	#N/A	#N/A	#N/A	#N/A	#N/A	#N/A	#N/A	#N/A
Lcp2:33990565.7	Lcp2:33990565	Lcp2	Proximal	chr11	33990565	33991111	0.31	0.13	0.16	0.35	0.46	0.23	0.22	0.35	0.27625	0.07	-0.01	-0.08	0.11	0.24	0.02	-0.07	0.23	0.06375	0.00810512	0.460481	24.0819	21.217	0.0642163	0.149085	0.149085	#N/A	#N/A	#N/A	#N/A	#N/A	#N/A	#N/A	#N/A	#N/A	#N/A	#N/A	#N/A	#N/A	#N/A	#N/A	#N/A
Lin9:182619399.1	Lin9:182619399	Lin9	Distal	chr1	182619399	182620818	0.24	0.34	0.51	0.14	0.11	0.27	0.48	0.23	0.29	0.02	-0.04	-0.42	0.32	0.4	0.07	-0.23	0.05	0.02125	0.0343738	0.698516	28.0312	17.5997	0.0638657	0.325275	0.325275	#N/A	#N/A	#N/A	#N/A	#N/A	#N/A	#N/A	#N/A	#N/A	#N/A	#N/A	#N/A	#N/A	#N/A	#N/A	#N/A
Lin9:182619399.2	Lin9:182619399	Lin9	Proximal	chr1	182619399	182620640	0.26	0.3	0.09	0.46	0.51	0.34	0.25	0.28	0.31125	0.02	-0.04	-0.42	0.32	0.4	0.07	-0.23	0.05	0.02125	0.0343738	0.698516	28.0312	17.5997	0.0638657	0.325275	0.325275	#N/A	#N/A	#N/A	#N/A	#N/A	#N/A	#N/A	#N/A	#N/A	#N/A	#N/A	#N/A	#N/A	#N/A	#N/A	#N/A
Litaf:10961144.4	Litaf:10961144	Litaf	Distal	chr16	10959604	10961144	0.23	0.15	0.16	0.11	0.06	0.16	0.35	0.03	0.15625	0.16	0.28	0.37	0.46	0.61	0.32	-0.07	0.38	0.31375	2.99782e-06	0.0183976	28.284	14.7155	0.35051	0.223231	0.223231	15.901	12.237	8.638	9.29	16.806	9.228	6.283	9.778	11.0201	0.00333558	0.0559469	23.078	0.813965	10.9361	4.19042	0.383172
Litaf:10961144.5	Litaf:10961144	Litaf	Proximal	chr16	10959662	10961144	0.39	0.43	0.53	0.57	0.67	0.48	0.28	0.41	0.47	0.16	0.28	0.37	0.46	0.61	0.32	-0.07	0.38	0.31375	2.99782e-06	0.0183976	28.284	14.7155	0.35051	0.223231	0.223231	15.901	12.237	8.638	9.29	16.806	9.228	6.283	9.778	11.0201	0.00333558	0.0559469	23.078	0.813965	10.9361	4.19042	0.383172
Lrp4:91351586.1	Lrp4:91351586	Lrp4	Distal	chr2	91351586	91354058	0.19	0.58	0.69	0.33	0.43	0.47	0.5	0.27	0.4325	0.43	-0.38	-0.52	0.2	0	-0.05	-0.11	0.26	-0.02125	0.0476314	0.798951	22.861	22.1552	-0.0358218	0.326843	0.326843	2.294	2.096	6.524	4.183	2.556	3.273	5.331	4.018	3.78438	0.0239971	0.160663	23.1925	12.6546	3.8112	2.0012	0.525083
Lrp4:91351586.2	Lrp4:91351586	Lrp4	Proximal	chr2	91351586	91353978	0.62	0.2	0.17	0.53	0.43	0.42	0.39	0.53	0.41125	0.43	-0.38	-0.52	0.2	0	-0.05	-0.11	0.26	-0.02125	0.0476314	0.798951	22.861	22.1552	-0.0358218	0.326843	0.326843	2.294	2.096	6.524	4.183	2.556	3.273	5.331	4.018	3.78438	0.0239971	0.160663	23.1925	12.6546	3.8112	2.0012	0.525083
Lrp5:3585291.1	Lrp5:3585291	Lrp5	Distal	chr19	3584828	3585291	0.58	0.38	0.27	0.54	0.46	0.15	0.47	0.48	0.41625	-0.16	0.24	0.46	-0.08	0.08	0.7	0.06	0.04	0.1675	0.00146273	0.289956	21.3423	11.1103	0.202826	0.30998	0.30998	5.693	4.967	2.626	4.178	5.153	4.119	2.048	3.916	4.0875	0.00250418	0.0495156	23.1288	0.740195	4.05966	1.48324	0.365361
Lrp5:3585291.2	Lrp5:3585291	Lrp5	Proximal	chr19	3584922	3585291	0.42	0.62	0.73	0.46	0.54	0.85	0.53	0.52	0.58375	-0.16	0.24	0.46	-0.08	0.08	0.7	0.06	0.04	0.1675	0.00146273	0.289956	21.3423	11.1103	0.202826	0.30998	0.30998	5.693	4.967	2.626	4.178	5.153	4.119	2.048	3.916	4.0875	0.00250418	0.0495156	23.1288	0.740195	4.05966	1.48324	0.365361
Lrrc8d:106240743.1	Lrrc8d:106240743	Lrrc8d	Distal	chr5	106240743	106244229	0.23	0.41	0.3	0.18	0.21	0.22	0.35	0.14	0.255	0.29	-0.01	0.13	0.47	0.32	0.2	0.07	0.2	0.20875	0.00287682	0.308846	28.4126	15.3383	0.242421	0.203094	0.203094	3.02	3.589	2.5	2.476	3.017	2.698	2.277	2.582	2.76988	0.0165423	0.12976	22.2732	3.11465	2.76133	0.432168	0.156507
Lrrc8d:106240743.2	Lrrc8d:106240743	Lrrc8d	Proximal	chr5	106240743	106244102	0.52	0.4	0.43	0.65	0.53	0.42	0.42	0.34	0.46375	0.29	-0.01	0.13	0.47	0.32	0.2	0.07	0.2	0.20875	0.00287682	0.308846	28.4126	15.3383	0.242421	0.203094	0.203094	3.02	3.589	2.5	2.476	3.017	2.698	2.277	2.582	2.76988	0.0165423	0.12976	22.2732	3.11465	2.76133	0.432168	0.156507
Lyrm2:32888118.2	Lyrm2:32888118	Lyrm2	Distal	chr4	32888118	32888358	0.42	0.49	0.53	0.65	0.53	0.27	0.62	0.56	0.50875	-0.12	-0.2	-0.28	-0.52	-0.26	0.19	-0.46	-0.43	-0.26	0.0477852	0.798951	26.0819	1.18522	-0.275645	0.216047	0.216047	36.612	37.112	32.975	35.405	34.063	34.014	32.985	32.434	34.45	0.887186	1	26.0819	23.3855	34.4508	0.688288	0.0199789
Lyrm2:32888118.3	Lyrm2:32888118	Lyrm2	Proximal	chr4	32888118	32888310	0.3	0.29	0.25	0.13	0.27	0.46	0.16	0.13	0.24875	-0.12	-0.2	-0.28	-0.52	-0.26	0.19	-0.46	-0.43	-0.26	0.0477852	0.798951	26.0819	1.18522	-0.275645	0.216047	0.216047	36.612	37.112	32.975	35.405	34.063	34.014	32.985	32.434	34.45	0.887186	1	26.0819	23.3855	34.4508	0.688288	0.0199789
Magix:7252317.1	Magix:7252317	Magix	Distal	chrX	7250286	7252317	0.43	0.35	0.34	0.54	0.5	0.37	0.49	0.64	0.4575	0.14	0.3	0.32	-0.08	0	0.26	0.02	-0.28	0.085	0.00218796	0.298389	22.916	7.4242	0.094834	0.20808	0.20808	11.083	13.121	7.981	9.971	11.791	11.324	8.756	9.089	10.3895	0.0866222	0.364033	23.2511	1.51795	10.3743	2.06014	0.198581
Magix:7252317.2	Magix:7252317	Magix	Proximal	chrX	7251753	7252317	0.57	0.65	0.66	0.46	0.5	0.63	0.51	0.36	0.5425	0.14	0.3	0.32	-0.08	0	0.26	0.02	-0.28	0.085	0.00218796	0.298389	22.916	7.4242	0.094834	0.20808	0.20808	11.083	13.121	7.981	9.971	11.791	11.324	8.756	9.089	10.3895	0.0866222	0.364033	23.2511	1.51795	10.3743	2.06014	0.198581
Malt1:65635642.2	Malt1:65635642	Malt1	Distal	chr18	65635642	65638491	0.2	0.31	0.43	0.29	0.23	0.32	0.25	0.22	0.28125	0.37	0.2	-0.23	0.13	0.24	0.05	0.11	0.2	0.13375	0.0156421	0.530173	22.033	1.79946	0.12191	0.196431	0.196431	1.854	2.225	1.634	1.567	1.855	2.315	1.957	1.739	1.89325	0.0173848	0.133338	26.8466	0.259771	1.8594	0.337958	0.181757
Malt1:65635642.3	Malt1:65635642	Malt1	Proximal	chr18	65635642	65638460	0.57	0.51	0.2	0.42	0.47	0.37	0.36	0.42	0.415	0.37	0.2	-0.23	0.13	0.24	0.05	0.11	0.2	0.13375	0.0156421	0.530173	22.033	1.79946	0.12191	0.196431	0.196431	1.854	2.225	1.634	1.567	1.855	2.315	1.957	1.739	1.89325	0.0173848	0.133338	26.8466	0.259771	1.8594	0.337958	0.181757
Mapk1:17038645.1	Mapk1:17038645	Mapk1	Distal	chr16	17038645	17039155	0.5	0.55	0.38	0.32	0.56	0.5	0.42	0.46	0.46125	0	-0.1	0.24	0.36	-0.12	0	0.16	0.08	0.0775	0.0490125	0.798951	22.082	15.7895	0.0753352	0.225939	0.225939	10.644	11.489	11.494	10.563	10.91	11.663	11.462	9.741	10.9958	0.000434103	0.0245157	23.3255	6.93433	11.0189	0.774202	0.0702611
Mapk1:17038645.2	Mapk1:17038645	Mapk1	Proximal	chr16	17038645	17038738	0.5	0.45	0.62	0.68	0.44	0.5	0.58	0.54	0.53875	0	-0.1	0.24	0.36	-0.12	0	0.16	0.08	0.0775	0.0490125	0.798951	22.082	15.7895	0.0753352	0.225939	0.225939	10.644	11.489	11.494	10.563	10.91	11.663	11.462	9.741	10.9958	0.000434103	0.0245157	23.3255	6.93433	11.0189	0.774202	0.0702611
Mapk6:75236954.4	Mapk6:75236954	Mapk6	Distal	chr9	75234711	75236954	0.26	0.2	0.3	0.37	0.19	0.23	0.2	0.34	0.26125	0.02	-0.09	-0.17	-0.08	0.11	0	-0.13	-0.07	-0.05125	0.00371269	0.325497	27.4556	20.0095	-0.0426012	0.118225	0.118225	12.686	14.955	15.227	11.99	10.948	13.829	16.979	13.336	13.7437	0.000317602	0.0228879	27.8818	2.78202	13.3663	2.63226	0.196932
Mapk6:75236954.6	Mapk6:75236954	Mapk6	Proximal	chr9	75236554	75236954	0.28	0.11	0.13	0.29	0.3	0.23	0.07	0.27	0.21	0.02	-0.09	-0.17	-0.08	0.11	0	-0.13	-0.07	-0.05125	0.00371269	0.325497	27.4556	20.0095	-0.0426012	0.118225	0.118225	12.686	14.955	15.227	11.99	10.948	13.829	16.979	13.336	13.7437	0.000317602	0.0228879	27.8818	2.78202	13.3663	2.63226	0.196932
Mapk8:34195510.1	Mapk8:34195510	Mapk8	Distal	chr14	34191084	34195510	0.31	0.27	0.27	0.46	0.35	0.34	0.29	0.48	0.34625	0.22	0.37	0.21	-0.01	0.16	0.21	0.22	-0.12	0.1575	0.0145353	0.524725	26.5762	1.60688	0.140824	0.162355	0.162355	5.128	6.068	6.777	4.952	4.868	5.92	6.558	4.257	5.566	0.00538853	0.0703452	23.4726	9.06156	5.59149	1.10588	0.197779
Mapk8:34195510.4	Mapk8:34195510	Mapk8	Proximal	chr14	34193978	34195510	0.53	0.64	0.48	0.45	0.51	0.55	0.51	0.36	0.50375	0.22	0.37	0.21	-0.01	0.16	0.21	0.22	-0.12	0.1575	0.0145353	0.524725	26.5762	1.60688	0.140824	0.162355	0.162355	5.128	6.068	6.777	4.952	4.868	5.92	6.558	4.257	5.566	0.00538853	0.0703452	23.4726	9.06156	5.59149	1.10588	0.197779
Mett5d1:108933454.1	Mett5d1:108933454	Mett5d1	Distal	chr2	108932456	108933454	0.5	0.78	0.63	0.19	0.15	0.3	0.16	0	0.33875	0	-0.56	-0.26	0.62	0.7	0.4	0.68	1	0.3225	0.0197347	0.56296	27.0194	18.0377	0.363107	0.36397	0.36397	#N/A	#N/A	#N/A	#N/A	#N/A	#N/A	#N/A	#N/A	#N/A	#N/A	#N/A	#N/A	#N/A	#N/A	#N/A	#N/A
Mett5d1:108933454.2	Mett5d1:108933454	Mett5d1	Proximal	chr2	108932811	108933454	0.5	0.22	0.37	0.81	0.85	0.7	0.84	1	0.66125	0	-0.56	-0.26	0.62	0.7	0.4	0.68	1	0.3225	0.0197347	0.56296	27.0194	18.0377	0.363107	0.36397	0.36397	#N/A	#N/A	#N/A	#N/A	#N/A	#N/A	#N/A	#N/A	#N/A	#N/A	#N/A	#N/A	#N/A	#N/A	#N/A	#N/A
Mettl11a:30677882.1	Mettl11a:30677882	Mettl11a	Distal	chr2	30677882	30678644	0.18	0.11	0.21	0.24	0.1	0.11	0.37	0.14	0.1825	0.64	0.78	0.58	0.52	0.8	0.78	0.26	0.72	0.635	0.0250926	0.613473	21.6223	4.7238	0.631922	0.233501	0.233501	3.624	3.837	4.099	3.183	3.451	4.335	3.361	3.47	3.67	0.126753	0.467573	19.7447	12.4838	3.73488	0.452151	0.121062
Mettl11a:30677882.2	Mettl11a:30677882	Mettl11a	Proximal	chr2	30677882	30678534	0.82	0.89	0.79	0.76	0.9	0.89	0.63	0.86	0.8175	0.64	0.78	0.58	0.52	0.8	0.78	0.26	0.72	0.635	0.0250926	0.613473	21.6223	4.7238	0.631922	0.233501	0.233501	3.624	3.837	4.099	3.183	3.451	4.335	3.361	3.47	3.67	0.126753	0.467573	19.7447	12.4838	3.73488	0.452151	0.121062
Mif4gd:115469927.1	Mif4gd:115469927	Mif4gd	Distal	chr11	115467968	115469927	0.53	0.68	0.87	0.75	0.58	0.71	0.6	0.41	0.64125	-0.45	-0.45	-0.82	-0.59	-0.29	-0.54	-0.47	-0.18	-0.47375	0.0221766	0.578201	23.479	7.28797	-0.47679	0.126986	0.126986	66.421	55.2	47.338	54.916	67.111	44.113	49.811	65.114	56.253	0.00240166	0.0485112	22.0116	1.31192	55.4942	10.8538	0.195584
Mif4gd:115469927.3	Mif4gd:115469927	Mif4gd	Proximal	chr11	115469398	115469927	0.08	0.23	0.05	0.16	0.29	0.17	0.13	0.23	0.1675	-0.45	-0.45	-0.82	-0.59	-0.29	-0.54	-0.47	-0.18	-0.47375	0.0221766	0.578201	23.479	7.28797	-0.47679	0.126986	0.126986	66.421	55.2	47.338	54.916	67.111	44.113	49.811	65.114	56.253	0.00240166	0.0485112	22.0116	1.31192	55.4942	10.8538	0.195584
Mmd2:143040895.2	Mmd2:143040895	Mmd2	Distal	chr5	143039434	143040895	0.75	0.66	0.61	0.84	0.67	0.63	0.72	0.81	0.71125	-0.53	-0.35	-0.24	-0.71	-0.38	-0.28	-0.48	-0.65	-0.4525	0.0126814	0.51201	21.9855	9.06818	-0.436425	0.18545	0.18545	#N/A	#N/A	#N/A	#N/A	#N/A	#N/A	#N/A	#N/A	#N/A	#N/A	#N/A	#N/A	#N/A	#N/A	#N/A	#N/A
Mmd2:143040895.3	Mmd2:143040895	Mmd2	Proximal	chr5	143040514	143040895	0.22	0.31	0.37	0.13	0.29	0.35	0.24	0.16	0.25875	-0.53	-0.35	-0.24	-0.71	-0.38	-0.28	-0.48	-0.65	-0.4525	0.0126814	0.51201	21.9855	9.06818	-0.436425	0.18545	0.18545	#N/A	#N/A	#N/A	#N/A	#N/A	#N/A	#N/A	#N/A	#N/A	#N/A	#N/A	#N/A	#N/A	#N/A	#N/A	#N/A
Mphosph8:57315968.1	Mphosph8:57315968	Mphosph8	Distal	chr14	57315968	57316528	0.31	0.2	0.09	0.33	0.57	0.39	0.26	0.4	0.31875	0.38	0.6	0.82	0.34	-0.14	0.22	0.48	0.2	0.3625	0.0478646	0.798951	27.5535	4.36313	0.321121	0.353324	0.353324	6.137	4.631	6.812	5.717	6.711	7.168	7.601	5.222	6.24988	0.937168	1	20.6667	15.5149	6.29971	0.771786	0.122511
Mphosph8:57315968.2	Mphosph8:57315968	Mphosph8	Proximal	chr14	57315968	57316267	0.69	0.8	0.91	0.67	0.43	0.61	0.74	0.6	0.68125	0.38	0.6	0.82	0.34	-0.14	0.22	0.48	0.2	0.3625	0.0478646	0.798951	27.5535	4.36313	0.321121	0.353324	0.353324	6.137	4.631	6.812	5.717	6.711	7.168	7.601	5.222	6.24988	0.937168	1	20.6667	15.5149	6.29971	0.771786	0.122511
Mri1:86775610.1	Mri1:86775610	Mri1	Distal	chr8	86773806	86775610	0.13	0.08	0.11	0.21	0.21	0.15	0.1	0.2	0.14875	0.69	0.77	0.72	0.47	0.44	0.64	0.72	0.56	0.62625	0.00159862	0.289956	28.5315	0.814602	0.598226	0.165208	0.165208	20.505	18.777	24.609	17.346	19.253	21.416	17.389	17.979	19.6593	0.82822	1	20.6667	10.7722	19.8912	1.85696	0.093356
Mri1:86775610.3	Mri1:86775610	Mri1	Proximal	chr8	86775387	86775610	0.82	0.85	0.83	0.68	0.65	0.79	0.82	0.76	0.775	0.69	0.77	0.72	0.47	0.44	0.64	0.72	0.56	0.62625	0.00159862	0.289956	28.5315	0.814602	0.598226	0.165208	0.165208	20.505	18.777	24.609	17.346	19.253	21.416	17.389	17.979	19.6593	0.82822	1	20.6667	10.7722	19.8912	1.85696	0.093356
Mrpl42:94943611.2	Mrpl42:94943611	Mrpl42	Distal	chr10	94943439	94943611	0.2	0.15	0.39	0.38	0.13	0.33	0.36	0.16	0.2625	0.59	0.69	0.19	0.22	0.72	0.24	0.21	0.63	0.43625	0.0211582	0.574122	22.0134	3.11749	0.426305	0.2958	0.2958	11.183	10.231	11.37	12.505	12.064	11.646	14.649	13.947	12.1994	0.0871952	0.365731	22.308	18.2765	12.1514	0.804739	0.0662259
Mrpl42:94943611.3	Mrpl42:94943611	Mrpl42	Proximal	chr10	94943467	94943611	0.79	0.84	0.58	0.6	0.85	0.57	0.57	0.79	0.69875	0.59	0.69	0.19	0.22	0.72	0.24	0.21	0.63	0.43625	0.0211582	0.574122	22.0134	3.11749	0.426305	0.2958	0.2958	11.183	10.231	11.37	12.505	12.064	11.646	14.649	13.947	12.1994	0.0871952	0.365731	22.308	18.2765	12.1514	0.804739	0.0662259
Mrps30:119169476.4	Mrps30:119169476	Mrps30	Distal	chr13	119169074	119169476	0.13	0.52	0.27	0.07	0.35	0.3	0.16	0.12	0.24	0.61	-0.12	0.38	0.8	0.17	0.29	0.62	0.57	0.415	0.0399917	0.738227	22.4539	17.3669	0.399832	0.342096	0.342096	20.546	21.085	20.926	18.467	17.695	20.589	24.172	18.211	20.2114	0.023198	0.157901	27.8566	1.68592	19.8261	2.53997	0.128113
Mrps30:119169476.5	Mrps30:119169476	Mrps30	Proximal	chr13	119169108	119169476	0.74	0.4	0.65	0.87	0.52	0.59	0.78	0.69	0.655	0.61	-0.12	0.38	0.8	0.17	0.29	0.62	0.57	0.415	0.0399917	0.738227	22.4539	17.3669	0.399832	0.342096	0.342096	20.546	21.085	20.926	18.467	17.695	20.589	24.172	18.211	20.2114	0.023198	0.157901	27.8566	1.68592	19.8261	2.53997	0.128113
Mtcp1:72650557.2	Mtcp1:72650557	Mtcp1	Distal	chrX	72650185	72650557	0.59	0.75	0.65	0.57	0.42	0.58	0.76	0.65	0.62125	-0.23	-0.56	-0.39	-0.19	0.1	-0.22	-0.6	-0.49	-0.3225	0.0239864	0.607232	27.3333	18.2463	-0.289095	0.295674	0.295674	7.483	8.637	7.019	5.777	5.787	6.381	3.937	3.993	6.12675	0.0723889	0.322767	22.3299	5.0768	6.14907	0.9236	0.150202
Mtcp1:72650557.3	Mtcp1:72650557	Mtcp1	Proximal	chrX	72650389	72650557	0.36	0.19	0.26	0.38	0.52	0.36	0.16	0.16	0.29875	-0.23	-0.56	-0.39	-0.19	0.1	-0.22	-0.6	-0.49	-0.3225	0.0239864	0.607232	27.3333	18.2463	-0.289095	0.295674	0.295674	7.483	8.637	7.019	5.777	5.787	6.381	3.937	3.993	6.12675	0.0723889	0.322767	22.3299	5.0768	6.14907	0.9236	0.150202
Mtdh:34070447.3	Mtdh:34070447	Mtdh	Distal	chr15	34070447	34073292	0.52	0.47	0.35	0.37	0.36	0.35	0.29	0.39	0.3875	-0.45	-0.36	-0.06	-0.12	-0.27	-0.28	-0.02	-0.05	-0.20125	0.0403528	0.738227	26.1733	11.2627	-0.198074	0.144366	0.144366	6.698	5.958	6.902	6.594	6.713	7.583	7.584	6.719	6.84387	0.897627	1	21.9938	18.6065	6.85354	0.139168	0.0203061
Mtdh:34070447.8	Mtdh:34070447	Mtdh	Proximal	chr15	34070447	34071034	0.07	0.11	0.29	0.25	0.09	0.07	0.27	0.34	0.18625	-0.45	-0.36	-0.06	-0.12	-0.27	-0.28	-0.02	-0.05	-0.20125	0.0403528	0.738227	26.1733	11.2627	-0.198074	0.144366	0.144366	6.698	5.958	6.902	6.594	6.713	7.583	7.584	6.719	6.84387	0.897627	1	21.9938	18.6065	6.85354	0.139168	0.0203061
Mthfsd:123621825.5	Mthfsd:123621825	Mthfsd	Distal	chr8	123621417	123621825	0.3	0.51	0.43	0.35	0.31	0.46	0.21	0.21	0.3475	0.03	-0.21	-0.23	-0.08	0.06	-0.25	-0.04	0.24	-0.06	0.0131594	0.516223	22.2255	21.3164	-0.0742199	0.179536	0.179536	5.779	7.492	6.212	6.63	5.688	5.581	4.579	6.088	6.00612	0.970587	1	25.9504	8.69834	5.99697	0.245118	0.0408736
Mthfsd:123621825.6	Mthfsd:123621825	Mthfsd	Proximal	chr8	123621461	123621825	0.33	0.3	0.2	0.27	0.37	0.21	0.17	0.45	0.2875	0.03	-0.21	-0.23	-0.08	0.06	-0.25	-0.04	0.24	-0.06	0.0131594	0.516223	22.2255	21.3164	-0.0742199	0.179536	0.179536	5.779	7.492	6.212	6.63	5.688	5.581	4.579	6.088	6.00612	0.970587	1	25.9504	8.69834	5.99697	0.245118	0.0408736
Mtrr:68701309.2	Mtrr:68701309	Mtrr	Distal	chr13	68700158	68701309	0.44	0.65	0.75	0.48	0.36	0.58	0.56	0.44	0.5325	-0.01	-0.5	-0.61	-0.09	0.15	-0.4	-0.3	0.03	-0.21625	0.00332983	0.309624	23.7091	21.5045	-0.220036	0.337175	0.337175	3.541	2.022	4.321	3.234	3.89	2.294	3.03	3.212	3.193	0.817483	1	28.1415	12.153	3.27921	0.651567	0.198697
Mtrr:68701309.4	Mtrr:68701309	Mtrr	Proximal	chr13	68701046	68701309	0.43	0.15	0.14	0.39	0.51	0.18	0.26	0.47	0.31625	-0.01	-0.5	-0.61	-0.09	0.15	-0.4	-0.3	0.03	-0.21625	0.00332983	0.309624	23.7091	21.5045	-0.220036	0.337175	0.337175	3.541	2.022	4.321	3.234	3.89	2.294	3.03	3.212	3.193	0.817483	1	28.1415	12.153	3.27921	0.651567	0.198697
Myo1b:51808140.2	Myo1b:51808140	Myo1b	Distal	chr1	51806663	51808140	0.42	0.35	0.35	0.28	0.37	0.18	0.39	0.54	0.36	-0.17	-0.03	0.06	-0.17	-0.34	-0.14	0.09	-0.21	-0.11375	0.0114072	0.490432	27.2333	4.31818	-0.135932	0.190168	0.190168	13.163	11.843	8.102	10.874	11.129	9.2	8.404	7.961	10.0845	0.147064	0.517893	26.1733	21.911	10.1289	1.36877	0.135135
Myo1b:51808140.4	Myo1b:51808140	Myo1b	Proximal	chr1	51806833	51808140	0.25	0.32	0.41	0.11	0.03	0.04	0.48	0.33	0.24625	-0.17	-0.03	0.06	-0.17	-0.34	-0.14	0.09	-0.21	-0.11375	0.0114072	0.490432	27.2333	4.31818	-0.135932	0.190168	0.190168	13.163	11.843	8.102	10.874	11.129	9.2	8.404	7.961	10.0845	0.147064	0.517893	26.1733	21.911	10.1289	1.36877	0.135135
Naa40:7302581.1	Naa40:7302581	Naa40	Distal	chr19	7300163	7302581	0.77	0.84	0.88	0.71	0.66	0.85	0.93	0.85	0.81125	-0.54	-0.68	-0.76	-0.42	-0.32	-0.7	-0.86	-0.7	-0.6225	0.0315777	0.666789	27.0985	18.1386	-0.597433	0.224819	0.224819	5.435	6.15	5.882	5.51	6.19	6.866	6.155	4.932	5.89	0.142834	0.506974	23.5742	5.99522	5.9019	0.665776	0.112807
Naa40:7302581.2	Naa40:7302581	Naa40	Proximal	chr19	7300462	7302581	0.23	0.16	0.12	0.29	0.34	0.15	0.07	0.15	0.18875	-0.54	-0.68	-0.76	-0.42	-0.32	-0.7	-0.86	-0.7	-0.6225	0.0315777	0.666789	27.0985	18.1386	-0.597433	0.224819	0.224819	5.435	6.15	5.882	5.51	6.19	6.866	6.155	4.932	5.89	0.142834	0.506974	23.5742	5.99522	5.9019	0.665776	0.112807
Nacc1:87197203.3	Nacc1:87197203	Nacc1	Distal	chr8	87194375	87197203	0.93	0.91	0.88	0.74	0.71	0.77	0.74	0.66	0.7925	-0.89	-0.88	-0.79	-0.5	-0.48	-0.57	-0.55	-0.36	-0.6275	0.0347218	0.702793	27.8186	16.0962	-0.609207	0.123426	0.123426	11.699	10.89	13.145	15.92	12.981	11.911	11.209	17.209	13.1205	0.0225389	0.155058	27.5221	13.8097	13.4593	2.56476	0.190556
Nacc1:87197203.4	Nacc1:87197203	Nacc1	Proximal	chr8	87195762	87197203	0.04	0.03	0.09	0.24	0.23	0.2	0.19	0.3	0.165	-0.89	-0.88	-0.79	-0.5	-0.48	-0.57	-0.55	-0.36	-0.6275	0.0347218	0.702793	27.8186	16.0962	-0.609207	0.123426	0.123426	11.699	10.89	13.145	15.92	12.981	11.911	11.209	17.209	13.1205	0.0225389	0.155058	27.5221	13.8097	13.4593	2.56476	0.190556
Ncapd3:26902282.3	Ncapd3:26902282	Ncapd3	Distal	chr9	26902282	26902874	0.38	0.29	0.4	0.43	0.47	0.23	0.42	0.45	0.38375	0.01	0.18	-0.13	-0.27	-0.26	0.37	-0.1	-0.14	-0.0425	0.0352807	0.707575	27.0635	1.08733	-0.0717358	0.241048	0.241048	1.703	2.069	1.755	1.37	1.355	1.629	2.011	1.27	1.64525	0.0216443	0.151799	27.9894	1.44614	1.5871	0.373477	0.235321
Ncapd3:26902282.4	Ncapd3:26902282	Ncapd3	Proximal	chr9	26902282	26902709	0.39	0.47	0.27	0.16	0.21	0.6	0.32	0.31	0.34125	0.01	0.18	-0.13	-0.27	-0.26	0.37	-0.1	-0.14	-0.0425	0.0352807	0.707575	27.0635	1.08733	-0.0717358	0.241048	0.241048	1.703	2.069	1.755	1.37	1.355	1.629	2.011	1.27	1.64525	0.0216443	0.151799	27.9894	1.44614	1.5871	0.373477	0.235321
Ncrna00081:54005992.6	Ncrna00081:54005992	Ncrna00081	Distal	chr19	54005594	54005992	0.29	0.23	0.43	0.52	0.5	0.35	0.38	0.55	0.40625	-0.15	-0.01	-0.27	-0.26	-0.23	0.06	-0.14	-0.39	-0.17375	0.0241333	0.607232	26.99	26.6648	-0.191028	0.175619	0.175619	11.635	10.422	8.577	8.521	8.871	9.281	9.389	8.21	9.36325	0.32154	0.862445	27.3333	25.3173	9.29092	0.880034	0.0947198
Ncrna00081:54005992.7	Ncrna00081:54005992	Ncrna00081	Proximal	chr19	54005620	54005992	0.14	0.22	0.16	0.26	0.27	0.41	0.24	0.16	0.2325	-0.15	-0.01	-0.27	-0.26	-0.23	0.06	-0.14	-0.39	-0.17375	0.0241333	0.607232	26.99	26.6648	-0.191028	0.175619	0.175619	11.635	10.422	8.577	8.521	8.871	9.281	9.389	8.21	9.36325	0.32154	0.862445	27.3333	25.3173	9.29092	0.880034	0.0947198
Ndufa3:3569505.1	Ndufa3:3569505	Ndufa3	Distal	chr7	3569505	3569827	0.49	0.68	0.69	0.6	0.35	0.44	0.71	0.58	0.5675	0.02	-0.36	-0.38	-0.2	0.3	0.12	-0.42	-0.16	-0.135	0.0134573	0.516223	26.2872	20.3079	-0.112694	0.345473	0.345473	115.684	120.066	122.734	131.036	144.439	150.101	113.606	129.333	128.375	0.80636	1	27.3333	18.5309	129.608	11.4476	0.0883246
Ndufa3:3569505.2	Ndufa3:3569505	Ndufa3	Proximal	chr7	3569505	3569779	0.51	0.32	0.31	0.4	0.65	0.56	0.29	0.42	0.4325	0.02	-0.36	-0.38	-0.2	0.3	0.12	-0.42	-0.16	-0.135	0.0134573	0.516223	26.2872	20.3079	-0.112694	0.345473	0.345473	115.684	120.066	122.734	131.036	144.439	150.101	113.606	129.333	128.375	0.80636	1	27.3333	18.5309	129.608	11.4476	0.0883246
Nfxl1:72905570.2	Nfxl1:72905570	Nfxl1	Distal	chr5	72904600	72905570	0.36	0.42	0.49	0.48	0.35	0.42	0.66	0.38	0.445	0.02	0.02	-0.23	-0.06	0.15	0.01	-0.46	0.07	-0.06	0.0262183	0.613473	22.5899	1.93499	-0.0664962	0.243636	0.243636	2.309	1.926	2.98	2.56	2.128	2.638	3.311	1.512	2.4205	0.0574653	0.279866	21.479	14.4597	2.45646	0.69287	0.282061
Nfxl1:72905570.3	Nfxl1:72905570	Nfxl1	Proximal	chr5	72904750	72905570	0.38	0.44	0.26	0.42	0.5	0.43	0.2	0.45	0.385	0.02	0.02	-0.23	-0.06	0.15	0.01	-0.46	0.07	-0.06	0.0262183	0.613473	22.5899	1.93499	-0.0664962	0.243636	0.243636	2.309	1.926	2.98	2.56	2.128	2.638	3.311	1.512	2.4205	0.0574653	0.279866	21.479	14.4597	2.45646	0.69287	0.282061
[truncated: 286 more rows]
